# Supplementary material for: Single-nucleus multiomic atlas of ALS primary motor cortex nominates neuroprotective WDR49-expressing astrocytes
Source: Research Square preprint supplement (doi:10.21203/rs.3.rs-9853460/v1), 2026-06-01
Supplement: Supplementary file 1 [file c25d6fb2140349414391639a.xlsx]

## Sheet: Supplementary Table 1
Supplementary Table 1: Metadata for ALS patient and control primary motor cortex samples used to generate single-nucleus transcriptomes and chromatin accessibility profiles.
Sample_ID	Case/Control	Type of ALS	Sex	ALS Survival (months)	Age at death (years)	RNA reads mapped to transcriptome	ATAC TSS enrichment	Source Brain Bank
39_ALS_1	Control	NA	Male	NA	51	0.6689	4.7102	Sheffield
39_ALS_10	Control	NA	Male	NA	58	0.7367	6.0868	Sheffield
39_ALS_11	ALS	Sporadic	Female	12	64	0.4515	1.7159	Sheffield
39_ALS_12	Control	NA	Male	NA	63	0.7225	4.8603	Sheffield
39_ALS_13	Control	NA	Male	NA	63	0.7319	3.173	Sheffield
39_ALS_14	ALS	Sporadic	Female	12	65	0.4567	2.1118	Sheffield
39_ALS_15	ALS	C9ORF72	Female	36	64	0.7232	5.2439	Sheffield
39_ALS_16	ALS	Sporadic	Female	NA	65	0.6868	4.8304	Sheffield
39_ALS_17	ALS	Sporadic	Male	24	66	0.6847	4.1482	Sheffield
39_ALS_18	ALS	C9ORF72	Female	36	64	0.3346	1.3738	Sheffield
39_ALS_19	Control	NA	Female	NA	63	0.5842	5.8687	Sheffield
39_ALS_2	ALS	Sporadic	Male	36	46	0.6535	2.624	Sheffield
39_ALS_20	ALS	C9ORF72	Female	48	67	0.5963	2.0156	Sheffield
39_ALS_21	ALS	C9ORF72	Female	24	69	0.6793	4.4079	Sheffield
39_ALS_22	Control	NA	Male	NA	71	0.6876	4.3333	Sheffield
39_ALS_23	ALS	Sporadic	Female	12	67	0.4595	1.5906	Sheffield
39_ALS_24	Control	NA	Male	NA	73	0.6675	4.613	Sheffield
39_ALS_25	Control	NA	Female	NA	75	0.5153	2.3497	Sheffield
39_ALS_26	ALS	Sporadic	Female	24	69	0.6237	3.1831	Sheffield
39_ALS_27	ALS	C9ORF72	Female	48	76	0.6277	3.1595	Sheffield
39_ALS_28	ALS	Sporadic	Male	NA	72	0.4417	4.3441	Sheffield
39_ALS_29	ALS	Sporadic	Female	36	76	0.6676	3.1444	Sheffield
39_ALS_3	ALS	C9ORF72	Male	12	46	0.6745	2.96	Sheffield
39_ALS_30	ALS	C9ORF72	Male	144	79	0.6949	3.5955	Sheffield
39_ALS_31	Control	NA	Female	NA	75	0.2807	3.2724	Sheffield
39_ALS_32	Control	NA	Male	NA	81	0.7494	4.6266	Sheffield
39_ALS_33	Control	NA	Female	NA	84	0.7164	2.8539	Sheffield
39_ALS_34	ALS	Sporadic	Male	NA	78	0.723	2.785	Sheffield
39_ALS_35	ALS	Sporadic	Male	NA	78	0.7289	3.8891	Sheffield
39_ALS_36	Control	NA	Male	NA	NA	0.7419	3.768	Sheffield
39_ALS_37	Control	NA	Male	NA	NA	0.7035	3.3791	Sheffield
39_ALS_38	ALS	Sporadic	Female	NA	78	0.6194	5.0898	Sheffield
39_ALS_39	ALS	Sporadic	Male	12	79	0.4481	2.8764	Sheffield
39_ALS_4	ALS	Sporadic	Male	12	48	0.6654	5.4197	Sheffield
39_ALS_5	ALS	Sporadic	Male	36	61	0.7105	5.0365	Sheffield
39_ALS_6	ALS	C9ORF72	Male	12	48	0.6973	4.1359	Sheffield
39_ALS_7	Control	NA	Male	NA	53	0.725	5.4777	Sheffield
39_ALS_8	ALS	C9ORF72	Male	36	59	0.4542	2.0495	Sheffield
39_ALS_9	ALS	C9ORF72	Male	24	64	0.7137	4.1759	Sheffield
ALS_50	ALS	C9ORF72	Female	12	73	0.732	6	Columbia
ALS_51	ALS	C9ORF72	Female	60	51	0.71	7.2	Barrow/Dignity Health
ALS_52	ALS	Sporadic	Female	24	61	0.68	5.36	Georgetown
ALS_53	Control	NA	Male	NA	51	0.7	3.71	Georgetown
ALS_54	ALS	C9ORF72	Female	24	70	0.69	4.15	Columbia
ALS_55	ALS	Sporadic	Female	48	68	0.65	4.33	Georgetown
ALS_56	ALS	Sporadic	Male	0	66	0.63	4.14	Georgetown
ALS_57	Control	NA	Male	NA	63	0.38	4.48	Georgetown
ALS_58	ALS	C9ORF72	Male	NA	67	0.62	5.38	Barrow/Dignity Health
ALS_59	ALS	Sporadic	Male	36	73	0.73	4.36	Georgetown
ALS_60	Control	NA	Male	NA	71	0.61	5.16	Georgetown
ALS_61	Control	NA	Male	NA	68	0.478	4.46	Georgetown
ALS_62	ALS	C9ORF72	Female	24	62	0.72	5.04	Barrow/Dignity Health
ALS_63	ALS	Sporadic	Male	36	55	0.68	5.29	Georgetown
ALS_64	ALS	Sporadic	Male	36	67	0.66	3.49	Georgetown
ALS_65	Control	NA	Male	NA	48	0.246	1.98	Georgetown
ALS_66	ALS	C9ORF72	Female	15	68	0.525	6.91	Columbia
ALS_67	ALS	Sporadic	Female	48	59	0.71	2.83	Georgetown
ALS_68	Control	NA	Female	NA	82	0.683	2.98	Georgetown
ALS_69	Control	NA	Male	NA	91	0.683	3.68	Georgetown
ALS_70	ALS	C9ORF72	Male	24	63	0.74	4.59	Barrow/Dignity Health
ALS_71	ALS	C9ORF72	Male	52	66	0.663	5.67	Columbia
ALS_72	ALS	Sporadic	Male	72	69	0.702	5.56	Georgetown
ALS_73	Control	NA	Male	NA	75	0.477	4.04	Georgetown
ALS-1-1	Control	NA	Female	NA	68	0.6188	2.761	Sheffield
ALS-1-2	Control	NA	Female	NA	86	0.7095	4.6308	Sheffield
ALS-1-3	ALS	Sporadic	Male	NA	72	0.7322	5.4419	Sheffield
ALS-1-4	ALS	Sporadic	Female	NA	60	0.6949	3.6984	Sheffield
ALS-1-5	Control	NA	Female	NA	70	0.6692	3.9297	Sheffield
ALS-1-7	ALS	C9ORF72	Female	NA	68	0.7308	4.8489	Sheffield
ALS-1-8	ALS	Sporadic	Female	NA	59	0.7208	3.9699	Sheffield

## Sheet: Supplementary Table 2
Supplementary Table 2: Cell proportions per sample within primary motor cortex.
Sample	Astrocytes	Claustrum Neurons	Corticothalamic L6 Neurons	Extratelencephalic L5 Neurons	Endothelial Cells	Intratelencephalic L2/3 Neurons	Intratelencephalic L4 Neurons	Intratelencephalic L5 Neurons	Intratelencephalic L6 Neurons	Layer 6b Neurons	LAMP5 Interneurons	Microglia	NDNF Interneurons	Near-Projecting Neurons	Oligodendrocytes	Oligodendrocyte Precursor Cells	Parvalbumin Interneurons	Parvalbumin Chandelier Cells	Somatostatin-Expressing Neurons	VIP Interneurons	Vascular Leptomeningeal Cells	WDR49+ Astrocytes	status
191112_ALS_110_snRNA-B9	0.148022	0.00695624	0.00550028	0.00517674	0.00711801	0.25916	0.0312222	0.0462671	0.0221629	0.00614738	0.027825	0.0433552	0.029928	0.00760333	0.116315	0.0723125	0.0504732	0.00905929	0.0312222	0.066974	0.00711801	8.08865e-05	ALS
191112_ALS_111_snRNA-B10	0.0819957	0.00777017	0.0143135	0.00531643	0.0137	0.201411	0.0388508	0.0519374	0.0304672	0.0224926	0.0245374	0.0271956	0.0218792	0.00961047	0.235763	0.0879256	0.0388508	0.0102239	0.0212657	0.0443717	0.0100194	0.000102239	ALS
191112_ALS_112_snRNA-D1	0.0950444	0.00554734	0.0110947	0.000184911	0.000739645	0.0362426	0.012574	0.0151627	0.0247781	0.0366124	0.00998521	0.0532544	0.00480769	0.00628698	0.531435	0.0876479	0.0306953	0.00295858	0.0133136	0.0136834	0.00776627	0.000184911	ALS
191112_ALS_114_snRNA-B12	0.0461134	0.0264474	0.0303467	0.00966347	0.00542511	0.179198	0.0496736	0.0883275	0.0751038	0.0281427	0.022209	0.0779859	0.00966347	0.0245825	0.123252	0.0583199	0.0532339	0.0083072	0.0476392	0.0276341	0.00864627	8.47673e-05	ALS
191112_ALS_115_snRNA-C1	0.0655938	0.0137289	0.0137289	0.00122035	0.00457631	0.259629	0.0762718	0.0842041	0.0431699	0.0149493	0.0221188	0.0485089	0.019373	0.00884753	0.0710853	0.0631531	0.0552208	0.00793227	0.0658989	0.0533903	0.0073221	7.62718e-05	ALS
191112_ALS_116_snRNA-C2	0.122243	0.0046088	0.0153627	0.00241413	0.0171184	0.147921	0.0322616	0.0392845	0.0447712	0.0287501	0.0201909	0.0177768	0.0160211	0.00943707	0.264677	0.0994184	0.0333589	0.0059256	0.029628	0.0340173	0.0147043	0.000109733	ALS
191112_ALS_117_snRNA-C3	0.131645	0.0123248	0.0268166	0.00812623	0.0058238	0.202478	0.0375161	0.0746259	0.0502472	0.0232952	0.0230243	0.0237015	0.0197738	0.0111058	0.0977856	0.0742195	0.0575608	0.00853254	0.0585088	0.0440171	0.00880341	6.77186e-05	ALS
191112_ALS_118_snRNA-C4	0.0713558	0.020758	0.0263182	0.00759893	0.0111204	0.211473	0.0470763	0.0665369	0.069873	0.0341025	0.0187193	0.0179779	0.0237235	0.0111204	0.13641	0.057826	0.049671	0.00759893	0.0630155	0.0428135	0.00481883	9.26698e-05	ALS
191112_ALS_120_snRNA-A1	0.140351	0.00997028	0.0187901	0.00460167	0.00766945	0.312913	0.0417985	0.0628895	0.0391142	0.020324	0.0260761	0.0272265	0.023967	0.0069025	0.0251174	0.0634647	0.0580961	0.00709424	0.0425654	0.0494679	0.0115042	9.58681e-05	ALS
191112_ALS_122_snRNA-D2	0.109659	0.0102273	0.0375	0.000284091	0.00738636	0.0142045	0.0130682	0.00170455	0.0829545	0.0522727	0.0125	0.0136364	0.00340909	0.00454545	0.435795	0.155682	0.0113636	0.00397727	0.0142045	0.00454545	0.0107955	0.000284091	ALS
191112_ALS_124_snRNA-A3	0.17142	0.0120893	0.0244885	0.0049597	0.00433974	0.204278	0.0576565	0.050527	0.0468072	0.016119	0.0282083	0.032858	0.0309981	0.0136392	0.000154991	0.119653	0.0443273	0.00898946	0.0681959	0.0564166	0.00371978	0.000154991	ALS
191112_ALS_126_snRNA-A6	0.0954598	0.019092	0.0200233	0.0032596	0.00232829	0.0689173	0.0330617	0.051688	0.0461001	0.0293364	0.016298	0.112689	0.0032596	0.00791618	0.326892	0.0763679	0.0293364	0.00419092	0.0274738	0.0218859	0.00419092	0.000232829	ALS
191112_ALS_127_snRNA-A4	0.113621	0.00848734	0.0106776	0.00383299	0.00164271	0.236824	0.102122	0.0845996	0.0342231	0.0158795	0.0183436	0.0350445	0.0169747	0.0109514	0.114716	0.0323066	0.044627	0.00574949	0.0665298	0.0386037	0.00410678	0.000136893	ALS
191112_ALS_128_snRNA-A7	0.111264	0.015752	0.0290036	0.00150019	0.00325041	0.174772	0.0832604	0.0780098	0.0630079	0.0260033	0.0167521	0.0247531	0.015752	0.00900113	0.169021	0.063758	0.0362545	0.00700088	0.0342543	0.032254	0.00525066	0.000125016	ALS
191112_ALS_129_snRNA-A2	0.0852736	0.0161116	0.0143433	0.00766284	0.0023578	0.241085	0.0514785	0.0842912	0.0451911	0.0127714	0.0267217	0.0304549	0.0216131	0.0133608	0.131251	0.063464	0.0540328	0.00648394	0.0447981	0.0444051	0.00275076	9.82415e-05	ALS
191112_ALS_130_snRNA-A5	0.0407883	0.0113737	0.0247083	0.00470634	0.00431415	0.220414	0.0470634	0.0717717	0.060202	0.0184332	0.0364742	0.0635356	0.0237278	0.0170605	0.0907932	0.0725561	0.0656927	0.00764781	0.0598098	0.0556917	0.00313756	9.80488e-05	ALS
191114_PN_301_snRNA-E7	0.141704	0.00743113	0.0189622	0.0061499	0.00384369	0.210122	0.0376682	0.0535554	0.0438181	0.0169122	0.0217809	0.0471493	0.0128123	0.0115311	0.190391	0.0620115	0.0407431	0.00563741	0.0330557	0.0315183	0.00307495	0.000128123	Control
191114_PN_303_snRNA-E8	0.170174	0.0133316	0.0295386	0.00522807	0.010979	0.0870474	0.0308456	0.0590772	0.0802509	0.0373807	0.0151614	0.0386878	0.00601229	0.0159456	0.237355	0.0865246	0.0360737	0.00575088	0.0146386	0.0151614	0.00470527	0.000130702	Control
191114_PN_304_snRNA-E9	0.0728381	0.0166854	0.0317664	0.0102679	0.00128349	0.0535858	0.0266324	0.04043	0.0869565	0.037863	0.0349751	0.0465266	0.0070592	0.0166854	0.167175	0.218193	0.0583988	0.00898444	0.0291994	0.0291994	0.00513396	0.000160436	Control
191114_PN_306_snRNA-E10	0.121647	0.0132802	0.0249668	0.0063745	0.0063745	0.0807437	0.0281541	0.0727756	0.0770252	0.0414343	0.0111554	0.0722444	0.00159363	0.00849934	0.239575	0.0950863	0.0446215	0.0132802	0.0239044	0.010093	0.00690571	0.000265604	Control
191114_PN_307_snRNA-E11	0.114082	0.0085013	0.0153572	0.00521048	0.00137118	0.136569	0.0342794	0.0732209	0.047717	0.018648	0.0252297	0.0743178	0.00822707	0.0120664	0.248732	0.0723982	0.0438777	0.00575895	0.0263266	0.0257781	0.00219388	0.000137118	Control
191114_PN_309_snRNA-F1	0.111929	0.0133105	0.0129071	0.00685691	0.00282343	0.238379	0.0391247	0.0685691	0.0437632	0.0225875	0.0221841	0.0566704	0.019159	0.00806696	0.141172	0.0546536	0.0530402	0.00887365	0.0328728	0.0348896	0.00806696	0.000100837	Control
191114_PN_317_snRNA-F2	0.0282336	0.00741133	0.0155285	0.00564673	0.00494089	0.196577	0.035292	0.0504676	0.0299982	0.0204694	0.0179989	0.093171	0.022234	0.00917593	0.238574	0.0896418	0.0377625	0.00741133	0.0377625	0.0455267	0.00599965	0.00017646	Control
191114_PN_318_snRNA-F3	0.0578635	0.0356083	0.0178042	0.00074184	0.0252226	0.133531	0.00890208	0.00445104	0.14095	0.102374	0.0133531	0.0504451	0.00296736	0.00296736	0.0445104	0.293769	0.0118694	0.0074184	0.0163205	0.0192878	0.00890208	0.00074184	Control
191114_PN_319_snRNA-F4	0.0309789	0.0111524	0.0136307	0.000619579	0.00495663	0.0508055	0.0371747	0.0371747	0.0359356	0.0483271	0.00743494	0.0458488	0.00371747	0.0123916	0.522924	0.0644362	0.0297398	0.00495663	0.0247831	0.0086741	0.00371747	0.000619579	Control
191114_PN_322_snRNA-F5	0.279661	0.0201271	0.0222458	0.00741525	0.00741525	0.0985169	0.0455508	0.0847458	0.0979873	0.0407839	0.0143008	0.0805085	0.00370763	0.0116525	0.000264831	0.103814	0.0354873	0.00741525	0.0259534	0.00529661	0.00688559	0.000264831	Control
191114_PN_323_snRNA-F6	0.305863	0.000410004	0.00246002	0.000410004	0.0188602	0.0697007	0.00574006	0.0114801	0.00328003	0.00328003	0.00328003	0.0729807	0.00410004	0.000410004	0.385404	0.0754408	0.00492005	0.000410004	0.0131201	0.00492005	0.0131201	0.000410004	Control
191114_PN_324_snRNA-F7	0.00652529	0.0163132	0.0243215	0.0103811	0.00563547	0.175886	0.0551683	0.100549	0.0640664	0.0302536	0.0258045	0.0358891	0.0201691	0.018686	0.177369	0.0765238	0.0563547	0.0106777	0.0542785	0.029957	0.00504227	0.000148302	Control
191114_PN_325_snRNA-F8	0.115679	0.0109426	0.0175082	0.00500234	0.00343911	0.120369	0.0343911	0.0531499	0.0487729	0.0228232	0.0171956	0.0612787	0.01063	0.0118806	0.299828	0.0678443	0.0434579	0.0087541	0.0231358	0.0218853	0.00187588	0.000156323	Control
191114_PN_328_snRNA-F9	0.135125	0.0152435	0.0268699	0.00852603	0.00155019	0.224519	0.0527064	0.0777677	0.0625242	0.0294536	0.0222194	0.021961	0.0152435	0.013435	0.0974034	0.0769926	0.0483142	0.00594238	0.024803	0.0356543	0.0036171	0.000129182	Control
200721_PN_302_snRNA-B4	0.224822	0.012258	0.00975066	0.0105864	0.0117008	0.240145	0.0484747	0.0819056	0.0370525	0.0161582	0.00557181	0.0158796	0.012258	0.0100293	0.0777267	0.0916562	0.0317593	0.00891489	0.0114222	0.0328737	0.00891489	0.000139295	Control
201019_ALS_101_snRNA-B1	0.0601041	0.00679622	0.0182648	0.0133801	0.0140172	0.262929	0.0407773	0.0972709	0.0429011	0.0123181	0.0269725	0.0586174	0.0265477	0.00976957	0.0513964	0.0883509	0.065626	0.0106191	0.0318573	0.0516088	0.00976957	0.000106191	ALS
201019_ALS_102_snRNA-B2	0.00249377	0.00249377	0.0249377	0.0149626	0.42394	0.00249377	0.00249377	0.00249377	0.00249377	0.0897756	0.00249377	0.0149626	0.0249377	0.00249377	0.00249377	0.229426	0.00498753	0.00249377	0.00498753	0.0299252	0.109726	0.00249377	ALS
201019_ALS_103_snRNA-B3	0.0687867	0.00737	0.0103726	0.00464037	0.0270233	0.319094	0.0464037	0.0772485	0.0226559	0.00327556	0.0248396	0.00764296	0.0308448	0.0106456	0.100177	0.0668759	0.066057	0.00900778	0.0330285	0.051863	0.0120104	0.000136482	ALS
201019_ALS_104_snRNA-B4	0.17451	0.0183093	0.0260335	0.0031469	0.0449149	0.106136	0.0297525	0.0354742	0.0809612	0.0537834	0.00715205	0.017451	0.00200257	0.00514948	0.211129	0.12416	0.0160206	0.0031469	0.0108711	0.0108711	0.0188814	0.000143041	ALS
201019_ALS_106_snRNA-B5	0.0837682	0.011564	0.0186151	0.00479481	0.0329996	0.251869	0.0383585	0.0552813	0.0298971	0.0135383	0.023692	0.0208715	0.0301791	0.0109999	0.0987167	0.0863066	0.0547172	0.012128	0.053307	0.0504865	0.017769	0.000141024	ALS
201019_ALS_108_snRNA-B6	0.116982	0.00941509	0.0141226	0.00400141	0.0112981	0.285042	0.0327174	0.0581382	0.0284806	0.016241	0.023067	0.0470754	0.0313052	0.00870896	0.0894433	0.0567259	0.0437802	0.00800282	0.0484877	0.0562551	0.010592	0.000117689	ALS
201019_ALS_113_snRNA-B7	0.0299138	0.0204845	0.0156072	0.01073	0.0529995	0.379776	0.0780361	0.07576	0.0809624	0.0139815	0.00715331	0.0113803	0.0191839	0.00357665	0.0156072	0.0656804	0.0312144	0.01073	0.0110551	0.0409689	0.0250366	0.000162575	ALS
201019_PN_311_snRNA-B8	0.112256	0.0030695	0.013155	0.000877001	0.004385	0.00964701	0.00877001	0.0162245	0.039465	0.037711	0.00745451	0.211357	0.0013155	0.0048235	0.418329	0.0732296	0.0118395	0.000877001	0.0127165	0.00745451	0.0048235	0.00021925	Control
39_ALS_1	0.0869264	0.00373728	0.00664406	0.00138418	0.0121116	0.251575	0.0117655	0.0280296	0.0141186	0.00788982	0.00906637	0.0429095	0.0111426	0.0038757	0.378365	0.03412	0.0249844	0.00269915	0.0211779	0.0194477	0.0146031	0.0134265	Control
39_ALS_10	0.054729	0.0014352	0.00306176	4.784e-05	0.00401856	0.0066976	0.00019136	0.0014352	0.00296608	0.00698464	0.00229632	0.0573123	0.00076544	0.00066976	0.800746	0.0341578	0.0009568	9.568e-05	0.00200928	0.00076544	0.0028704	0.0157872	Control
39_ALS_11	0.325452	0.0164204	0.0047619	0.00426929	0.0221675	0.156322	0.079803	0.056486	0.046798	0.00788177	0.0103448	0.0124795	0.0110016	0.00295567	0.0504105	0.111658	0.0106732	0.00509031	0.00935961	0.0310345	0.017734	0.00689655	ALS
39_ALS_12	0.0716514	0.00251585	0.00644058	0.000905706	0.00422663	0.276442	0.0113716	0.0242528	0.0100634	0.0128812	0.00644058	0.0249572	0.00744692	0.00271712	0.4445	0.0314984	0.0191205	0.00110697	0.0143907	0.0133843	0.00674248	0.00694375	Control
39_ALS_13	0.0530452	0.0137525	0.00731658	0.0152429	0.01653	0.325791	0.0427478	0.0817018	0.0398347	0.0051487	0.0231014	0.00731658	0.0174107	0.00968769	0.179256	0.0280469	0.0575842	0.004268	0.0203238	0.025879	0.0186302	0.00738432	Control
39_ALS_14	0.45588	0.0133584	0.00206961	0.0208843	0.0656632	0.025588	0.020508	0.00526811	0.0276576	0.0165569	0.0028222	0.00771402	0.00188147	0.00507996	0.201129	0.0415804	0.00771402	0.00451552	0.00376294	0.0174976	0.0521167	0.000752587	ALS
39_ALS_15	0.111782	0.00430466	0.00791502	0.00194404	0.0161772	0.125321	0.0139554	0.0277026	0.0160383	0.00354093	0.013886	0.0757481	0.0143026	0.00645699	0.381032	0.0334653	0.0268694	0.00402694	0.0260362	0.0240922	0.0231202	0.0422829	ALS
39_ALS_16	0.0745367	0.00624496	0.0112812	0.00292103	0.0125907	0.174859	0.0197421	0.0353546	0.0173247	0.0122885	0.0111805	0.0746374	0.0116841	0.00775584	0.328263	0.0391821	0.0258864	0.00352538	0.0259871	0.0164182	0.0158139	0.0725222	ALS
39_ALS_17	0.112292	0.00951315	0.0135236	0.00326432	0.0150159	0.165827	0.0212647	0.032923	0.0267674	0.0104458	0.0156687	0.0644469	0.00830069	0.00699496	0.331095	0.0389853	0.0295654	0.00531617	0.0289125	0.0207051	0.0232233	0.0159485	ALS
39_ALS_18	0.397861	0.00713012	0.000356506	0.0752228	0.0848485	0.0484848	0.0142602	0.00784314	0.00534759	0.00106952	0.00106952	0.00748663	0.00784314	0.00499109	0.13262	0.106239	0.00891266	0.00677362	0.00926916	0.0253119	0.0456328	0.00142602	ALS
39_ALS_19	0.0867962	0.00567295	0.00992767	0.000709119	0.00964402	0.161821	0.0239682	0.0238264	0.0180116	0.0137569	0.00808396	0.0649553	0.00680755	0.00340377	0.431854	0.0589987	0.0164516	0.00241101	0.0167352	0.0126223	0.0208481	0.00269465	Control
39_ALS_2	0.128579	0.00407955	0.0118016	0.00437095	0.00939754	0.0849421	0.0182851	0.0279012	0.0264442	0.0160268	0.0112916	0.0678225	0.00794056	0.00706637	0.429591	0.0370802	0.0302324	0.0040067	0.0245502	0.0172652	0.0134042	0.0179209	ALS
39_ALS_20	0.161958	0.0288925	0.0213483	0.00176565	0.0261637	0.0836276	0.0868379	0.0707865	0.0645265	0.023756	0.0166934	0.0516854	0.00433387	0.0110754	0.151685	0.0677368	0.0245586	0.00256822	0.023756	0.0208668	0.0367576	0.0186196	ALS
39_ALS_21	0.0568925	0.00579323	0.00920974	0.00237671	0.00787285	0.17855	0.0111408	0.0317885	0.0199049	0.0123292	0.00742721	0.0528818	0.00623886	0.00876411	0.439542	0.0441176	0.0190137	0.00207962	0.0179739	0.0103981	0.0114379	0.0442662	ALS
39_ALS_22	0.137281	0.0157317	0.0287919	0.0011873	0.0105373	0.112793	0.0474918	0.0627783	0.0525378	0.0240427	0.011873	0.014396	0.00920154	0.00934996	0.28881	0.0488275	0.027011	0.00281983	0.0262689	0.0185515	0.0124666	0.0372514	Control
39_ALS_23	0.072929	0.0066568	0.00650888	0.00177515	0.00739645	0.00961538	0.012574	0.014645	0.0142012	0.00961538	0.00295858	0.106953	0.00162722	0.00281065	0.654734	0.0402367	0.00428994	0.000739645	0.00266272	0.00488166	0.00872781	0.0134615	ALS
39_ALS_24	0.0410928	0.00349966	0.00677354	0.000451569	0.0058704	0.0189659	0.00191917	0.00620908	0.0130955	0.00982163	0.0014676	0.00462858	0.000338677	0.00191917	0.801648	0.0305938	0.00203206	0.000225785	0.00428991	0.00169338	0.00541883	0.0380447	Control
39_ALS_25	0.151685	0.00753855	0.00982296	0.00217019	0.0137065	0.169389	0.033695	0.0635066	0.0258138	0.0118789	0.0133638	0.0487721	0.0162193	0.00696745	0.258824	0.0494575	0.0197601	0.00536836	0.0142776	0.025928	0.0198744	0.0319817	Control
39_ALS_26	0.135478	0.00404903	0.00569052	0.00492449	0.0192602	0.239659	0.02123	0.0342526	0.0209017	0.00448676	0.0182753	0.0505581	0.0172904	0.00689429	0.251368	0.0413657	0.0380827	0.00459619	0.0189319	0.0296564	0.0267017	0.00634712	ALS
39_ALS_27	0.156505	0.00666502	0.0154283	0.00629474	0.0181437	0.123056	0.0203653	0.0369045	0.0336954	0.0104912	0.0149346	0.0178968	0.00876327	0.00863984	0.350284	0.0572698	0.0257961	0.00456677	0.0132066	0.0186374	0.0283881	0.0240681	ALS
39_ALS_28	0.0942589	0.00237727	0.00843932	0.00166409	0.0318555	0.0616902	0.00499227	0.0106977	0.0217521	0.0175918	0.0039225	0.0299536	0.0013075	0.00190182	0.574825	0.0367289	0.00927137	0.00106977	0.00558659	0.00451682	0.0408891	0.0347082	ALS
39_ALS_29	0.113793	0.00468612	0.0091954	0.00698497	0.0211317	0.165782	0.0226348	0.0474801	0.0298851	0.00893015	0.0151194	0.0618921	0.0136163	0.00636605	0.312467	0.0386384	0.0343943	0.00512821	0.0187445	0.0227233	0.0259063	0.0145004	ALS
39_ALS_3	0.127892	0.00358061	0.00550863	0.0017444	0.0139552	0.27231	0.0356225	0.0306647	0.0129453	0.0026625	0.0170768	0.0414065	0.014047	0.0034888	0.215663	0.0378259	0.030022	0.00468234	0.0376423	0.027635	0.0220345	0.0415902	ALS
39_ALS_30	0.130034	0.0013168	0.00373093	0.0013168	0.0160211	0.245583	0.0440031	0.0314935	0.00899813	0.0006584	0.0184352	0.0702293	0.0243608	0.0006584	0.229672	0.0286404	0.0336881	0.00570613	0.0305059	0.0368704	0.0249095	0.013168	ALS
39_ALS_31	0.189859	0.01362	0.0160814	0.000328192	0.0247785	0.0587463	0.0521825	0.027404	0.0344601	0.0178864	0.0077125	0.0139481	0.0041024	0.00164096	0.327043	0.109452	0.00508697	0.00311782	0.00590745	0.0216606	0.0196915	0.0452904	Control
39_ALS_32	0.103311	0.00399268	0.00790218	0.00399268	0.00615538	0.0996506	0.0135585	0.0359341	0.0222925	0.0112294	0.00973216	0.0246215	0.00931625	0.00648811	0.497172	0.0430877	0.023457	0.00324405	0.0139744	0.0163866	0.00640492	0.0380968	Control
39_ALS_33	0.158513	0.00521853	0.00568447	0.00372752	0.0165875	0.214239	0.0259063	0.0434256	0.010903	0.00354114	0.0151896	0.0512534	0.0177989	0.00708228	0.242475	0.0355978	0.0314043	0.00559128	0.0235766	0.0335477	0.0176125	0.0311248	Control
39_ALS_34	0.173488	0.00747298	0.0105771	0.00885261	0.0127616	0.236491	0.0381697	0.0672568	0.0286273	0.00885261	0.0225339	0.0772591	0.0212693	0.0066682	0.0905955	0.0642676	0.044608	0.00689814	0.0237986	0.0346057	0.0104622	0.00448379	ALS
39_ALS_35	0.117485	5.51055e-05	5.51055e-05	0.000661266	0.013556	0.263184	0.0171929	0.0186257	0.000991899	5.51055e-05	0.0231443	0.0521298	0.0307489	0.000110211	0.247424	0.0544443	0.0387943	0.00815562	0.0310795	0.0499256	0.0210503	0.0111313	ALS
39_ALS_36	0.106972	0.00479616	0.00950668	0.00787941	0.00890716	0.314063	0.0270641	0.0604659	0.020298	0.00650908	0.0138746	0.0375128	0.024666	0.00822199	0.185081	0.0400822	0.0395683	0.00582391	0.0304042	0.0337444	0.00907845	0.00548133	Control
39_ALS_37	0.0885896	0.0131406	0.0183968	0.00448971	0.011498	0.0593517	0.0565046	0.054862	0.0452256	0.0226675	0.00941743	0.0122646	0.00306614	0.011717	0.437473	0.0305519	0.0240911	0.00306614	0.020806	0.0135786	0.00755585	0.0516864	Control
39_ALS_38	0.0498856	0.00594966	0.00594966	0.001373	0.00961098	0.308009	0.0146453	0.0297483	0.010984	0.0187643	0.00320366	0.0439359	0.00366133	0.00320366	0.39405	0.026087	0.0118993	0.00228833	0.00915332	0.00778032	0.00686499	0.0329519	ALS
39_ALS_39	0.0390414	0.00560495	0.00734441	0.00096637	0.0166216	0.0908388	0.0309239	0.0264785	0.0231929	0.0146888	0.014109	0.0409741	0.00715114	0.00947043	0.399497	0.0448396	0.00734441	0.00560495	0.00927716	0.0278315	0.011983	0.166216	ALS
39_ALS_4	0.117095	0.00449287	0.008031	0.00134786	0.00982815	0.178648	0.0316186	0.0290352	0.0171291	0.00876109	0.0116815	0.0821633	0.00988431	0.00555992	0.336347	0.0369538	0.0275188	0.00359429	0.0367292	0.0212288	0.0164551	0.00589689	ALS
39_ALS_5	0.0703306	0.00315856	0.0118621	0.00175476	0.00793149	0.179617	0.0104583	0.024356	0.0209869	0.0148101	0.00828245	0.0766477	0.00568541	0.00414122	0.424581	0.0382537	0.0160034	0.00294799	0.014389	0.0101074	0.0104583	0.0432372	ALS
39_ALS_6	0.109089	0.00725618	0.00811708	0.00184479	0.0234903	0.148936	0.0277949	0.0458738	0.0184479	0.00578035	0.0122986	0.10171	0.0143894	0.0097159	0.224942	0.0453819	0.0343131	0.00737917	0.0360349	0.0280408	0.035051	0.0541139	ALS
39_ALS_7	0.0706107	0.00667939	0.0170563	0.000954198	0.00727576	0.142414	0.0310115	0.0279103	0.021708	0.0193225	0.010854	0.0703721	0.00763359	0.00608302	0.416746	0.034709	0.0206345	0.0023855	0.023855	0.0183683	0.0109733	0.0324427	Control
39_ALS_8	0.287458	0.0082131	0.00488346	0.00488346	0.0348502	0.127636	0.0428413	0.0503885	0.0430633	0.00266371	0.0142064	0.0266371	0.0119867	0.0117647	0.136515	0.072586	0.0261931	0.00776915	0.0148724	0.0321865	0.0239734	0.0144284	ALS
39_ALS_9	0.0851866	0.00607926	0.0140054	0.00492497	0.0116968	0.234013	0.024394	0.0557907	0.0338592	0.0127741	0.0139284	0.0631781	0.00923432	0.0110042	0.272489	0.040631	0.0297037	0.00615621	0.0281647	0.0191612	0.00961908	0.0140054	ALS
ALS-1-1	0.288186	0.00619526	0.00384533	0.00320444	0.0369579	0.203589	0.0337535	0.0540483	0.0316172	0.00534074	0.0232856	0.0258492	0.0136723	0.0104678	0.0726341	0.0450758	0.0382397	0.0100406	0.0106815	0.0320444	0.0343944	0.0168767	Control
ALS-1-2	0.0796786	0.0041848	0.00887178	0.00251088	0.0110479	0.223301	0.033311	0.0510546	0.0224305	0.00703047	0.0164044	0.0577503	0.0204218	0.00502176	0.28624	0.038835	0.0336458	0.00753264	0.034148	0.0306327	0.0133914	0.0125544	Control
ALS-1-3	0.0701157	0.00306331	0.00953029	0.00374404	0.00680735	0.0992172	0.0108918	0.0211028	0.014806	0.0122532	0.00680735	0.0505446	0.00833901	0.00408441	0.557012	0.0311436	0.0168482	0.00306331	0.0173587	0.0153165	0.00918993	0.0287611	ALS
ALS-1-4	0.156729	0.00316306	0.00553535	0.00442828	0.0221414	0.16954	0.0197691	0.0343192	0.0162897	0.00173968	0.013443	0.0509252	0.0128104	0.00347936	0.324055	0.0330539	0.0332121	0.00411197	0.0311561	0.0333702	0.017555	0.00917286	ALS
ALS-1-5	0.108995	0.0082686	0.0165372	0.0082686	0.0243047	0.11551	0.0157855	0.043097	0.0370834	0.0150338	0.0107742	0.0303182	0.00451015	0.0082686	0.413681	0.0478577	0.0215485	0.00225507	0.0202957	0.0115259	0.0253069	0.0107742	Control
ALS-1-6	0.183593	0.0129253	0.00553944	0.00263783	0.021894	0.0751781	0.0134529	0.0422052	0.042469	0.00923239	0.012134	0.0627803	0.0015827	0.00817726	0.370087	0.0664732	0.0197837	0.00237404	0.00817726	0.00949618	0.0258507	0.00395674	Control
ALS-1-7	0.082628	0.00114761	0.00372974	0.00401664	0.00717257	0.310142	0.0175011	0.0269689	0.00717257	0.000143451	0.0094678	0.0481997	0.0100416	0.00717257	0.305552	0.0284034	0.0272558	0.00573806	0.0301248	0.0200832	0.0106154	0.0367236	ALS
ALS-1-8	0.110457	0.00214133	0.00089222	0.001606	0.00927909	0.276588	0.0565667	0.0378301	0.00838687	0.001606	0.0146324	0.0374732	0.0205211	0.00303355	0.247323	0.028551	0.0308708	0.00517488	0.0206995	0.0351535	0.0142755	0.0369379	ALS
ALS_50	0.104361	0.00360902	0.0142857	0.00390977	0.0109774	0.0694737	0.0105263	0.0240602	0.027218	0.0147368	0.0109774	0.0667669	0.00691729	0.00676692	0.465113	0.04	0.0254135	0.00360902	0.0218045	0.013985	0.0147368	0.0407519	ALS
ALS_51	0.0300079	0.00198728	0.00914149	0.000198728	0.00556439	0.0675676	0.0121224	0.0151033	0.00934022	0.00715421	0.0063593	0.107114	0.00198728	0.00417329	0.571343	0.0427266	0.0121224	0.00218601	0.0127186	0.00556439	0.00735294	0.0681638	ALS
ALS_52	0.0942831	0.0352001	0.0184738	0.0145627	0.00474328	0.181743	0.0407756	0.0566697	0.0430224	0.0153949	0.0194724	0.0437713	0.0102355	0.0140634	0.212283	0.0466839	0.0434385	0.00732296	0.0317051	0.0393609	0.0101523	0.0166431	ALS
ALS_53	0.138295	0.00403609	0.00902184	0.00367996	0.00807217	0.186847	0.0201804	0.0357312	0.0173314	0.00629155	0.0129392	0.0344255	0.0149573	0.0042735	0.339981	0.0453466	0.0268281	0.00522317	0.0242165	0.0252849	0.0143637	0.0226733	Control
ALS_54	0.18246	0.00239904	0.0086632	0.00293216	0.015727	0.170865	0.0219912	0.0381181	0.0211915	0.00506464	0.0227909	0.100493	0.0151939	0.0073304	0.209383	0.0477142	0.0407837	0.00439824	0.0285219	0.0307877	0.0181261	0.00506464	ALS
ALS_55	0.0887953	0.00733458	0.0102216	0.00163858	0.0164638	0.24407	0.0534488	0.0450999	0.039872	0.0186486	0.0129526	0.0476748	0.0117041	0.00514981	0.252965	0.031133	0.0260612	0.00241885	0.0282459	0.0195069	0.0187266	0.0178683	ALS
ALS_56	0.0899443	0.0108782	0.0180419	0.00318387	0.0103476	0.126559	0.0233484	0.0443088	0.0355532	0.0130008	0.01645	0.0527992	0.00875564	0.00928628	0.292916	0.0440435	0.0432475	0.00212258	0.0275935	0.0217564	0.0132661	0.0925975	ALS
ALS_57	0.103951	0.0111494	0.0181997	0.0050828	0.0134448	0.0427939	0.0270536	0.0447614	0.0426299	0.025414	0.0124611	0.0119692	0.000819807	0.0109854	0.452041	0.0573865	0.0159042	0.00409903	0.0203312	0.00819807	0.0111494	0.0601738	Control
ALS_58	0.0937797	0.000712251	0.00379867	0.00332384	0.0118708	0.0752612	0.00949668	0.0140076	0.00498575	0.00118708	0.00925926	0.0662393	0.00759734	0.00403609	0.590931	0.0405983	0.0149573	0.00356125	0.0116334	0.0118708	0.00925926	0.0116334	ALS
ALS_59	0.106111	0.00369375	0.00705171	0.00302216	0.00587643	0.107119	0.0161182	0.0369375	0.0137676	0.00638012	0.0105776	0.0631296	0.0114171	0.00671592	0.448791	0.0416387	0.0250168	0.00352586	0.0201478	0.0189725	0.0105776	0.0334117	ALS
ALS_60	0.0935501	0.00666311	0.00772921	0.0010661	0.00959488	0.128198	0.0367804	0.0295842	0.0245203	0.0101279	0.010661	0.0466418	0.00772921	0.00239872	0.452292	0.0415778	0.0189232	0.00426439	0.0143923	0.0170576	0.00666311	0.0295842	Control
ALS_61	0.125096	0.00178344	0.0119745	0.0033121	0.00968153	0.0664968	0.0124841	0.0173248	0.0175796	0.0155414	0.00968153	0.0201274	0.00229299	0.00611465	0.517707	0.0550318	0.0119745	0.00254777	0.0109554	0.00942675	0.00993631	0.0629299	Control
ALS_62	0.0421859	0.0013719	0.00891734	0.000685949	0.0027438	0.0193209	0.00217217	0.00560192	0.0198925	0.00868869	0.0032011	0.0910026	0.0004573	0.00388705	0.697611	0.0389848	0.00731679	0.000114325	0.00514462	0.00160055	0.00617355	0.0329256	ALS
ALS_63	0.0891538	0.00846246	0.0131108	0.00357569	0.00595948	0.183433	0.0287247	0.0533969	0.027652	0.0117998	0.0125149	0.0563766	0.00738975	0.00822408	0.333254	0.0454112	0.0275328	0.00560191	0.0274136	0.0215733	0.00643623	0.0230036	ALS
ALS_64	0.106581	0.00502742	0.0112431	0.00411335	0.0133455	0.220201	0.0184644	0.0474406	0.0250457	0.00914077	0.011426	0.0309872	0.0047532	0.00813528	0.345521	0.0288848	0.0310786	0.00393053	0.0270567	0.0173675	0.0148995	0.0153565	ALS
ALS_65	0.291298	0.00202802	0.00202802	0.0250737	0.0200959	0.0853614	0.0147493	0.00497788	0.0110619	0.00368732	0.00792773	0.01309	0.0123525	0.00424041	0.327618	0.100111	0.00184366	0.00129056	0.00221239	0.0145649	0.0215708	0.0328171	Control
ALS_66	0.0589801	0.00745236	0.00383264	0.00276802	0.00809113	0.0200149	0.000638774	0.000106462	0.00106462	0.00340679	0.00298094	0.108379	0.00340679	0.00106462	0.661131	0.0540828	0.000212925	0.000212925	0.000638774	0.000425849	0.00872991	0.0523794	ALS
ALS_67	0.179316	0.00669202	0.0187072	0.00730038	0.0191635	0.125779	0.0301141	0.0594677	0.0337643	0.00562738	0.0135361	0.0403042	0.00988593	0.0132319	0.275437	0.0497338	0.0360456	0.00380228	0.0139924	0.0246388	0.0202281	0.0132319	ALS
ALS_68	0.123463	0.00878294	0.0143036	0.00163112	0.0155583	0.260351	0.0558344	0.0473024	0.0346299	0.0141782	0.00941029	0.0415307	0.00690088	0.00740276	0.207152	0.042409	0.0342535	0.00476788	0.0243413	0.019197	0.0145546	0.0120452	Control
ALS_69	0.111186	0.00582829	0.00997534	0.00235373	0.00773369	0.267989	0.025779	0.0492042	0.0218561	0.00986326	0.0103116	0.0643354	0.013562	0.0082941	0.229657	0.0233132	0.0410222	0.00560412	0.029926	0.0261152	0.0132257	0.0228648	Control
ALS_70	0.112467	0.00395778	0.00461741	0.00615655	0.00670624	0.251759	0.026715	0.0308927	0.0283641	0.00241865	0.0194591	0.0395778	0.0153914	0.00406772	0.282212	0.039248	0.0383685	0.00560686	0.0293536	0.0319921	0.0114336	0.00923483	ALS
ALS_71	0.0747381	0.0072362	0.0171725	0.00648018	0.00842424	0.0592937	0.0162005	0.037045	0.0384491	0.0144724	0.0070202	0.072146	0.00270008	0.0115563	0.520359	0.0303488	0.0178205	0.00259207	0.0108003	0.00561616	0.0116643	0.0278648	ALS
ALS_72	0.101594	0.00390329	0.0277567	0.00466226	0.0101919	0.131627	0.0182153	0.0419603	0.0397918	0.0164805	0.0135531	0.0578987	0.0103003	0.00921609	0.364307	0.0519354	0.0368644	0.00422856	0.0206007	0.018649	0.0126857	0.00357801	ALS
ALS_73	0.0803084	0.00668166	0.0147767	0.00700289	0.00668166	0.21921	0.0427883	0.0576293	0.0365564	0.0145198	0.0115002	0.023964	0.0113717	0.0100867	0.345198	0.0357854	0.0236428	0.00456152	0.0144555	0.019017	0.00693864	0.00732412	Control
SRR27882084	0.173041	0.00321822	0.00841688	0.00247555	0.00495111	0.0938235	0.0220324	0.0321822	0.0262409	0.0148533	0.0138631	0.0772373	0.0094071	0.00965466	0.342369	0.0606511	0.0319346	0.00470355	0.0306969	0.0292115	0.00891199	0.000123778	ALS
SRR27882085	0.17563	0.00972447	0.0232798	0.00294681	0.00677766	0.068366	0.0188596	0.0374245	0.0503905	0.0200383	0.0170915	0.0400766	0.0047149	0.0126713	0.361279	0.0739649	0.0321202	0.00294681	0.0235745	0.0141447	0.00383085	0.000147341	ALS
SRR27882086	0.113315	0.013725	0.0182442	0.00468658	0.0167378	0.200351	0.0413424	0.0592518	0.0418445	0.0155662	0.0202527	0.0517198	0.0251067	0.012386	0.142773	0.0657796	0.0453594	0.00736463	0.0443552	0.0418445	0.0179094	8.3689e-05	ALS
SRR27882088	0.104007	0.00979776	0.0203492	0.00653184	0.00929531	0.057028	0.020098	0.0374325	0.0537621	0.0213541	0.0135661	0.0404472	0.00175857	0.0135661	0.408994	0.0974752	0.0329104	0.00602939	0.0231127	0.0150735	0.00728552	0.000125612	ALS
SRR27882089	0.0811396	0.00980057	0.0225641	0.00820513	0.0148148	0.157493	0.0460399	0.0701994	0.0494587	0.0202849	0.0234758	0.0323647	0.0184615	0.0139031	0.207179	0.0624501	0.0558405	0.00729345	0.0494587	0.0389744	0.0104843	0.00011396	ALS
SRR27882090	0.134338	0.0125941	0.022225	0.00518583	0.0232127	0.100753	0.0197555	0.0409927	0.0533399	0.0301272	0.0237066	0.057291	0.0138289	0.0118533	0.241758	0.0913693	0.0444499	0.00592666	0.0217311	0.0246944	0.0207433	0.000123472	ALS
SRR27882091	0.104986	0.0147226	0.0184033	0.00385593	0.00666024	0.0890369	0.0254141	0.0422399	0.0422399	0.024713	0.0178775	0.0963982	0.00963982	0.0101656	0.29568	0.0669529	0.0436421	0.00666024	0.038384	0.0333012	0.00893874	8.76347e-05	ALS
SRR27882092	0.126088	0.00611621	0.0130165	0.00580256	0.00940955	0.223006	0.0352858	0.0500274	0.0318356	0.0136438	0.0196032	0.0840587	0.0268172	0.00925272	0.138634	0.0831177	0.049557	0.00752764	0.0225829	0.0393633	0.00517525	7.84129e-05	ALS
SRR27882093	0.054451	0.0108902	0.0118802	0.00396007	0.00280505	0.27011	0.0516459	0.0726013	0.0250804	0.0136952	0.0249154	0.059731	0.0293705	0.00759013	0.159888	0.0745813	0.0400957	0.0108902	0.0250804	0.0457058	0.00495009	8.25014e-05	ALS
SRR27882094	0.112452	0.0155751	0.0180671	0.00498404	0.00545129	0.219298	0.0431431	0.0591854	0.0447006	0.0190016	0.0241414	0.0401838	0.0261662	0.0140176	0.145316	0.0703995	0.0507749	0.00981232	0.0260104	0.0420528	0.00918932	7.78756e-05	ALS

## Sheet: Supplementary Table 3
Supplementary Table 3: ALS-associated gene expression changes per cell type within primary motor cortex
Cell type	Gene	Mean normaloised read cout	Log2 Fold Change	Log2 Fold Change Standad Error	Wald statistic	P-value	FDR adjusted p-value
Astrocytes	DDX3Y	39.8977	-2.81461	0.342392	-8.22044	2.02762e-16	4.28599e-12
Astrocytes	PPP2R2B	7091.36	-0.635088	0.101962	-6.22865	4.70468e-10	4.97238e-06
Astrocytes	ZNF10	103.6	-0.486056	0.0790237	-6.15076	7.71115e-10	5.43327e-06
Astrocytes	CHI3L1	412.559	2.12124	0.350476	6.05246	1.42653e-09	7.53851e-06
Astrocytes	PDGFA	47.0969	0.727823	0.124349	5.85307	4.82595e-09	2.04022e-05
Astrocytes	CASKIN2	32.2128	-0.549583	0.0944475	-5.81892	5.9228e-09	2.0866e-05
Astrocytes	HKDC1	30.3917	-1.21403	0.212663	-5.70871	1.13836e-08	3.43752e-05
Astrocytes	GBP2	43.4384	2.29855	0.407963	5.63422	1.75854e-08	3.99839e-05
Astrocytes	S100A10	17.1877	1.6405	0.290471	5.64773	1.62577e-08	3.99839e-05
Astrocytes	LINC00461	1481.68	-0.551348	0.0981923	-5.61498	1.96581e-08	3.99839e-05
Astrocytes	GPNMB	7.34519	1.29449	0.230946	5.60515	2.08072e-08	3.99839e-05
Astrocytes	COL8A1	12.0716	2.08325	0.378451	5.50468	3.69849e-08	6.51488e-05
Astrocytes	CSMD2	33.2125	1.17206	0.213785	5.48243	4.19527e-08	6.8215e-05
Astrocytes	CFI	21.942	1.54579	0.284058	5.44183	5.27373e-08	7.96258e-05
Astrocytes	JUND	106.746	-0.778812	0.144706	-5.38203	7.36513e-08	9.73026e-05
Astrocytes	CSNK1E	155.764	-0.346469	0.0643516	-5.384	7.28492e-08	9.73026e-05
Astrocytes	LOXL1	19.365	0.765546	0.142619	5.36777	7.97168e-08	9.91208e-05
Astrocytes	ZFHX4-AS1	104.396	-0.888734	0.165982	-5.35439	8.5846e-08	0.000100812
Astrocytes	LINC01503	28.973	1.42043	0.268347	5.29326	1.20158e-07	0.000129588
Astrocytes	AC061992.2	5.6156	2.11317	0.399499	5.28956	1.22612e-07	0.000129588
Astrocytes	GLUD1	850.166	-0.46357	0.0880088	-5.26732	1.38432e-07	0.000133008
Astrocytes	SEZ6L	93.3484	-1.64044	0.310977	-5.27513	1.32663e-07	0.000133008
Astrocytes	SAT1	239.015	-0.710681	0.135272	-5.25373	1.49046e-07	0.00013698
Astrocytes	DCHS1	22.5053	-0.620648	0.118683	-5.22947	1.70001e-07	0.000138211
Astrocytes	DNAJA4	78.2679	-1.50138	0.286713	-5.23653	1.63621e-07	0.000138211
Astrocytes	SHISA6	276.674	-1.01028	0.192813	-5.23967	1.60863e-07	0.000138211
Astrocytes	GABRB1	3825.62	-0.575677	0.110704	-5.20014	1.99136e-07	0.000155902
Astrocytes	FBXL14	40.4546	-0.833127	0.161383	-5.16243	2.43766e-07	0.000184026
Astrocytes	TGFBR2	11.5755	1.67289	0.32546	5.14008	2.74618e-07	0.000193496
Astrocytes	C3	66.7108	1.61414	0.313898	5.14225	2.71466e-07	0.000193496
Astrocytes	RGS7	843.786	-0.625143	0.122852	-5.08859	3.60739e-07	0.000214399
Astrocytes	PANTR1	843.549	-0.526525	0.103279	-5.09806	3.43153e-07	0.000214399
Astrocytes	AC007364.1	458.971	-0.538056	0.105334	-5.10808	3.25455e-07	0.000214399
Astrocytes	OGDHL	35.7493	-0.524206	0.103118	-5.08354	3.70472e-07	0.000214399
Astrocytes	RASSF9	4.34313	1.94228	0.380596	5.10327	3.33829e-07	0.000214399
Astrocytes	TMEM229B	11.6143	0.819796	0.161343	5.08109	3.75284e-07	0.000214399
Astrocytes	IL13RA1	30.6158	1.16676	0.229017	5.09464	3.49398e-07	0.000214399
Astrocytes	MAN1C1	358.217	1.23588	0.243814	5.06896	3.99997e-07	0.000222503
Astrocytes	MGAT4C	2373.4	-0.583201	0.115241	-5.06071	4.17707e-07	0.000226397
Astrocytes	LRRC8D	168.25	-0.388584	0.0769696	-5.04854	4.45197e-07	0.000235264
Astrocytes	TNIK	4831.68	-0.510057	0.101354	-5.03241	4.84348e-07	0.000249711
Astrocytes	RFTN1	108.393	1.1039	0.220374	5.00923	5.46487e-07	0.000275039
Astrocytes	TRIB1	24.4236	-0.76627	0.153221	-5.00108	5.70088e-07	0.000280245
Astrocytes	SERPINA3	209.673	1.90913	0.383815	4.97408	6.55585e-07	0.000314949
Astrocytes	SLC9B2	91.9716	0.713177	0.143767	4.96065	7.02594e-07	0.000315988
Astrocytes	SVIL	29.9839	1.09176	0.21996	4.96345	6.92515e-07	0.000315988
Astrocytes	AHNAK2	18.779	1.0249	0.206323	4.96747	6.78318e-07	0.000315988
Astrocytes	PLCE1	408.858	0.715135	0.144529	4.94803	7.49666e-07	0.000326768
Astrocytes	ITGA3	31.4508	0.842712	0.170382	4.94601	7.57481e-07	0.000326768
Astrocytes	FAM160A2	45.7269	-0.46273	0.0937321	-4.93673	7.9444e-07	0.000335858
Astrocytes	SEC31B	85.2841	-0.289498	0.0588886	-4.91602	8.83209e-07	0.000366064
Astrocytes	PHLPP1	1573.64	-0.548016	0.11197	-4.89432	9.86444e-07	0.000400989
Astrocytes	LINC01141	7.7518	1.71566	0.35162	4.87931	1.06455e-06	0.000424575
Astrocytes	PDPN	22.0094	1.32019	0.272041	4.8529	1.2167e-06	0.000476271
Astrocytes	AP3B1	526.592	-0.514612	0.106276	-4.84224	1.28383e-06	0.000493412
Astrocytes	GLDC	117.31	-0.46643	0.0964696	-4.835	1.33146e-06	0.000497297
Astrocytes	SERPINH1	62.1003	-1.8059	0.373615	-4.83358	1.34099e-06	0.000497297
Astrocytes	DIPK2A	195.538	-0.57991	0.120419	-4.81575	1.46645e-06	0.000525385
Astrocytes	SPATA2	23.6166	-0.567093	0.117701	-4.81806	1.44958e-06	0.000525385
Astrocytes	ID4	345.285	-0.5295	0.110338	-4.79889	1.59549e-06	0.000544179
Astrocytes	AC069209.2	8.89153	-0.74944	0.156172	-4.79881	1.59613e-06	0.000544179
Astrocytes	LINC00381	8.42636	-1.08703	0.226265	-4.80422	1.55356e-06	0.000544179
Astrocytes	KLHL26	31.2002	-0.549526	0.114594	-4.79543	1.62329e-06	0.000544651
Astrocytes	C1orf61	1024.09	-0.488202	0.101907	-4.79066	1.66234e-06	0.000549039
Astrocytes	AC188617.1	5.82708	1.2935	0.270777	4.777	1.77929e-06	0.000578624
Astrocytes	AL161457.2	15.2857	-0.569305	0.119278	-4.77293	1.81561e-06	0.00058149
Astrocytes	SLC25A33	237.408	-0.509939	0.106932	-4.76882	1.85308e-06	0.000584634
Astrocytes	MSI2	4175.44	-0.344914	0.0724171	-4.76288	1.90846e-06	0.000593252
Astrocytes	COLEC12	646.1	0.981181	0.206472	4.75213	2.01284e-06	0.000616629
Astrocytes	LTF	9.65596	2.82831	0.596307	4.74305	2.10525e-06	0.000635724
Astrocytes	RP1	9.99327	-1.26077	0.266099	-4.73795	2.15891e-06	0.000642748
Astrocytes	AL355306.2	7.855	-1.40899	0.297963	-4.72873	2.25933e-06	0.000663301
Astrocytes	AC008127.1	91.3622	-0.63932	0.13586	-4.70574	2.52948e-06	0.000732441
Astrocytes	NR4A1	28.806	-1.53958	0.327573	-4.69996	2.60209e-06	0.000743283
Astrocytes	MXD4	133.206	-0.414307	0.0882252	-4.69602	2.65277e-06	0.000744228
Astrocytes	STX3	11.6057	0.864898	0.184246	4.69425	2.67581e-06	0.000744228
Astrocytes	SLC20A1	116.198	-0.51233	0.109819	-4.66523	3.08277e-06	0.00083041
Astrocytes	LMO3	1106.27	-0.679555	0.145788	-4.66126	3.14282e-06	0.00083041
Astrocytes	DBX2	35.1073	-0.582935	0.124895	-4.66739	3.05048e-06	0.00083041
Astrocytes	CNTNAP1	55.6237	0.878599	0.188432	4.66269	3.12099e-06	0.00083041
Astrocytes	FGD4	1121.56	-0.443672	0.0952373	-4.6586	3.18367e-06	0.000830821
Astrocytes	SIK3	1716.95	-0.375064	0.0806159	-4.65248	3.27967e-06	0.000845436
Astrocytes	LINC01551	104	-0.67979	0.14642	-4.64273	3.43838e-06	0.000875668
Astrocytes	AP3B2	78.2863	-0.624152	0.134643	-4.63562	3.5587e-06	0.000895521
Astrocytes	OSBPL6	877.485	-0.3719	0.0805247	-4.61846	3.86599e-06	0.000961403
Astrocytes	CADM2	10274.1	-0.620061	0.134672	-4.60424	4.13967e-06	0.000986324
Astrocytes	NTRK2	4674.22	-0.542679	0.117941	-4.60126	4.19951e-06	0.000986324
Astrocytes	TUBB8	3.76503	-1.15818	0.251655	-4.60226	4.17923e-06	0.000986324
Astrocytes	AC015908.3	16.064	0.883683	0.191954	4.60362	4.1521e-06	0.000986324
Astrocytes	NEK8	21.3947	-0.897313	0.194852	-4.60511	4.12257e-06	0.000986324
Astrocytes	CCL2	23.5129	1.85851	0.404561	4.59391	4.35022e-06	0.00100345
Astrocytes	TMEM100	7.52628	-1.28631	0.280053	-4.59309	4.36735e-06	0.00100345
Astrocytes	ZSWIM8-AS1	7.12093	-0.830698	0.181182	-4.58488	4.5425e-06	0.00103247
Astrocytes	CTH	70.7245	-0.635929	0.13883	-4.58063	4.63585e-06	0.00104247
Astrocytes	C21orf62	20.7426	0.803585	0.175631	4.57542	4.75274e-06	0.00105751
Astrocytes	SLC2A4RG	35.1667	-0.481792	0.105401	-4.57102	4.85364e-06	0.00106871
Astrocytes	AC005548.1	2.22901	-1.14715	0.251092	-4.56866	4.90855e-06	0.00106966
Astrocytes	GCDH	88.6105	-0.385971	0.0845591	-4.56451	5.00652e-06	0.00107988
Astrocytes	LINC02774	31.9038	-0.909823	0.199604	-4.55814	5.16086e-06	0.00109489
Astrocytes	ANXA1	14.7934	1.53916	0.33773	4.55737	5.17972e-06	0.00109489
Astrocytes	FAH	33.7373	-0.364149	0.0800393	-4.54963	5.37401e-06	0.00111368
Astrocytes	ZNF625	29.3066	-0.57562	0.126496	-4.5505	5.3518e-06	0.00111368
Astrocytes	CCNG2	62.094	-0.527486	0.11609	-4.54377	5.52577e-06	0.00113402
Astrocytes	AC004485.1	3.78617	-1.18138	0.260352	-4.53762	5.68934e-06	0.00115636
Astrocytes	LINC02006	188.293	-0.764801	0.169214	-4.51973	6.19195e-06	0.0012089
Astrocytes	AC108159.1	2.54953	1.26656	0.280287	4.5188	6.21899e-06	0.0012089
Astrocytes	MAGI2	7714.19	-0.440296	0.0972912	-4.52555	6.02388e-06	0.0012089
Astrocytes	P2RY6	6.2263	1.47841	0.32681	4.52378	6.07452e-06	0.0012089
Astrocytes	EMP1	135.38	1.16518	0.257991	4.51637	6.291e-06	0.0012089
Astrocytes	JPH2	13.1097	1.41923	0.314227	4.51657	6.28505e-06	0.0012089
Astrocytes	AFF3	106.967	-0.610628	0.13546	-4.50781	6.55003e-06	0.0012362
Astrocytes	AC105411.1	76.3998	-0.69645	0.154465	-4.50879	6.51973e-06	0.0012362
Astrocytes	TMEM238L	4.67957	1.19122	0.264947	4.49607	6.92211e-06	0.00129486
Astrocytes	PXDN	42.9925	1.60263	0.357476	4.48319	7.35367e-06	0.00135167
Astrocytes	CIITA	21.7123	1.0377	0.231438	4.48372	7.33542e-06	0.00135167
Astrocytes	GPM6B	2333.59	-0.386548	0.0862851	-4.4799	7.46785e-06	0.00136082
Astrocytes	RPE65	21.0256	1.346	0.300701	4.4762	7.59844e-06	0.00136115
Astrocytes	GPM6A	14775.7	-0.481613	0.107576	-4.47695	7.57159e-06	0.00136115
Astrocytes	ARHGEF26-AS1	883.105	-0.468492	0.104779	-4.47124	7.77658e-06	0.00138136
Astrocytes	AC087379.1	2.96555	-1.14588	0.256416	-4.46883	7.86473e-06	0.00138537
Astrocytes	SLC4A4	3287.18	-0.528018	0.118203	-4.46703	7.93139e-06	0.00138557
Astrocytes	MMP28	175.745	-0.443696	0.0993726	-4.46497	8.00802e-06	0.00138749
Astrocytes	DNAJC22	4.58688	1.08907	0.244103	4.46154	8.13725e-06	0.00139842
Astrocytes	SPOCD1	5.98129	1.59211	0.357146	4.45786	8.27818e-06	0.00139987
Astrocytes	SOX2-OT	500.18	-0.429201	0.0962684	-4.45838	8.25811e-06	0.00139987
Astrocytes	LINC01344	31.7806	-0.725363	0.16306	-4.44844	8.64968e-06	0.00145109
Astrocytes	PKN2-AS1	191.34	-0.664732	0.149842	-4.43621	9.15559e-06	0.00148879
Astrocytes	C1RL	93.4955	0.921116	0.207472	4.43971	9.00821e-06	0.00148879
Astrocytes	HELB	56.668	1.13761	0.256437	4.4362	9.15592e-06	0.00148879
Astrocytes	FOXG1-AS1	141.741	-0.524107	0.118143	-4.4362	9.15616e-06	0.00148879
Astrocytes	GNAQ	2319.79	-0.336973	0.0760085	-4.43336	9.2775e-06	0.00149701
Astrocytes	RASGEF1B	168.833	1.55954	0.352501	4.42423	9.67868e-06	0.00153096
Astrocytes	NR3C2	1098.82	-0.450442	0.101764	-4.42635	9.58399e-06	0.00153096
Astrocytes	MAP3K14	223	0.936986	0.211813	4.42364	9.70523e-06	0.00153096
Astrocytes	SLC44A2	142.206	-0.32409	0.0734996	-4.40941	1.03653e-05	0.00162297
Astrocytes	TGFBR1	60.2536	-0.403296	0.0916335	-4.40119	1.0766e-05	0.00167332
Astrocytes	AC009879.4	171.267	-0.54056	0.122956	-4.39635	1.10086e-05	0.00168623
Astrocytes	ZFHX4	1228.67	-0.473835	0.107757	-4.39723	1.0964e-05	0.00168623
Astrocytes	LINC01934	18.7699	-0.873222	0.198956	-4.38903	1.13857e-05	0.00173145
Astrocytes	DCUN1D2	116.65	-0.358717	0.0821374	-4.36728	1.25804e-05	0.00187378
Astrocytes	USP3	344.908	-0.426435	0.097646	-4.36715	1.25876e-05	0.00187378
Astrocytes	DUSP15	14.2714	-0.672178	0.153898	-4.3677	1.25564e-05	0.00187378
Astrocytes	MXI1	678.059	-0.384087	0.0880449	-4.3624	1.28644e-05	0.00190159
Astrocytes	GFRA2	15.921	1.00695	0.231003	4.35903	1.3064e-05	0.00190758
Astrocytes	LINC00867	8.36348	-0.678758	0.15578	-4.35717	1.31757e-05	0.00190758
Astrocytes	CHST6	55.9396	0.920327	0.211158	4.35848	1.30971e-05	0.00190758
Astrocytes	INO80B	11.2895	0.540844	0.124272	4.35208	1.34851e-05	0.00191307
Astrocytes	SLC22A4	48.7653	0.920588	0.211506	4.35254	1.3457e-05	0.00191307
Astrocytes	C1RL-AS1	11.2663	0.910048	0.208986	4.35458	1.3332e-05	0.00191307
Astrocytes	AL031666.3	4.91372	-0.750487	0.172593	-4.34831	1.37193e-05	0.00193333
Astrocytes	LINC01102	31.2158	-0.658046	0.151708	-4.33758	1.44063e-05	0.00193932
Astrocytes	CP	81.4136	1.37231	0.316353	4.3379	1.43848e-05	0.00193932
Astrocytes	AC095060.1	87.0376	-0.782395	0.180226	-4.34118	1.41717e-05	0.00193932
Astrocytes	PRLR	10.3425	-1.89382	0.436687	-4.33679	1.44581e-05	0.00193932
Astrocytes	LYRM2	99.2014	0.41451	0.0955527	4.33803	1.43765e-05	0.00193932
Astrocytes	RABGAP1	572.138	-0.297524	0.0686042	-4.33682	1.44562e-05	0.00193932
Astrocytes	AL158058.1	18.3589	-1.11673	0.257516	-4.33655	1.44738e-05	0.00193932
Astrocytes	ANXA2	20.575	1.24058	0.286096	4.33621	1.44958e-05	0.00193932
Astrocytes	ZNF736	152.788	-0.420625	0.0970939	-4.33215	1.47662e-05	0.00196307
Astrocytes	MAP1B	713.346	0.668147	0.154359	4.32852	1.50115e-05	0.0019832
Astrocytes	ADD3	1757.31	-0.311209	0.0719587	-4.32483	1.52647e-05	0.00200414
Astrocytes	DIRAS3	10.6679	-0.701647	0.1624	-4.32049	1.55683e-05	0.00203138
Astrocytes	S1PR3	8.86127	0.886064	0.205249	4.31702	1.58152e-05	0.00205093
Astrocytes	NDRG2	599.267	-0.468597	0.108633	-4.31359	1.60622e-05	0.00207026
Astrocytes	NTSR2	76.3057	-0.588842	0.136723	-4.30683	1.65611e-05	0.00210885
Astrocytes	ERBB4	9012.9	-0.466599	0.108311	-4.30795	1.64775e-05	0.00210885
Astrocytes	P2RY2	3.66072	1.12102	0.260483	4.30362	1.6803e-05	0.00211417
Astrocytes	AL353660.1	54.6522	-0.836891	0.194413	-4.30472	1.672e-05	0.00211417
Astrocytes	JMY	159.882	-0.34862	0.0811354	-4.29677	1.73304e-05	0.00215805
Astrocytes	ADGRB3	7594.41	-0.531239	0.123646	-4.29644	1.73559e-05	0.00215805
Astrocytes	KLHL25	41.3047	-0.835726	0.194643	-4.29364	1.75764e-05	0.00217269
Astrocytes	HORMAD2	18.234	-0.60719	0.141621	-4.28744	1.80745e-05	0.00222127
Astrocytes	NEXN	26.3835	0.558788	0.130394	4.28539	1.82416e-05	0.00222596
Astrocytes	GBP1	36.8584	1.35007	0.315206	4.28313	1.84285e-05	0.00222596
Astrocytes	TUBB6	16.7754	1.12519	0.26267	4.28368	1.83829e-05	0.00222596
Astrocytes	EPHA2	15.0986	1.0846	0.253423	4.2798	1.87065e-05	0.00224669
Astrocytes	ZNF514	41.9481	0.427366	0.100056	4.27126	1.94375e-05	0.0023213
Astrocytes	AC072022.2	25.697	1.06815	0.250247	4.26837	1.96903e-05	0.00233828
Astrocytes	WDFY3-AS2	105.964	-0.401821	0.0942086	-4.26522	1.99701e-05	0.00234516
Astrocytes	ZNF433	34.1015	-0.529299	0.124068	-4.26621	1.9882e-05	0.00234516
Astrocytes	ARHGEF3	457.966	1.02136	0.239962	4.25633	2.07808e-05	0.00240036
Astrocytes	AC007923.4	57.2338	1.06814	0.250896	4.25731	2.06901e-05	0.00240036
Astrocytes	TBC1D10A	77.141	-0.483193	0.113477	-4.25806	2.06206e-05	0.00240036
Astrocytes	AL513166.1	285.883	-0.523445	0.123189	-4.24913	2.14601e-05	0.00245202
Astrocytes	LIN52	240.53	-0.329974	0.0776463	-4.2497	2.14057e-05	0.00245202
Astrocytes	NRXN1	13939	-0.544445	0.128222	-4.2461	2.17521e-05	0.00246028
Astrocytes	ARAP2	1437.71	-0.334762	0.0788424	-4.24597	2.17652e-05	0.00246028
Astrocytes	MYH9	168.922	0.801518	0.189224	4.23583	2.2771e-05	0.00256029
Astrocytes	AP002026.1	75.7472	-0.674717	0.159489	-4.2305	2.33171e-05	0.00260782
Astrocytes	CLCA4-AS1	8.68229	-0.851479	0.201675	-4.22204	2.42102e-05	0.00266907
Astrocytes	AC104825.1	6.53891	-0.604957	0.143296	-4.22173	2.42436e-05	0.00266907
Astrocytes	PLIN2	63.2524	-0.426853	0.101061	-4.2237	2.40326e-05	0.00266907
Astrocytes	ATPAF1	147.641	-0.272472	0.0646469	-4.21478	2.50024e-05	0.0026709
Astrocytes	AC007098.1	96.5932	-0.590267	0.140052	-4.21463	2.50183e-05	0.0026709
Astrocytes	NHSL1	2003.45	-0.46168	0.109531	-4.21508	2.49692e-05	0.0026709
Astrocytes	ATP6V1H	417.691	-0.363791	0.0862942	-4.21571	2.48997e-05	0.0026709
Astrocytes	ARHGAP32	1031.72	-0.322363	0.0764191	-4.21835	2.46095e-05	0.0026709
Astrocytes	TEX2	199.755	0.528402	0.125344	4.21561	2.49103e-05	0.0026709
Astrocytes	LINC01114	29.7816	-0.511463	0.121517	-4.20898	2.56528e-05	0.00271124
Astrocytes	APAF1	48.5319	-0.499341	0.118634	-4.2091	2.5639e-05	0.00271124
Astrocytes	AL451042.1	1.70183	1.37118	0.326185	4.20367	2.62616e-05	0.00272538
Astrocytes	OAT	97.7978	-0.417553	0.0993386	-4.20333	2.63022e-05	0.00272538
Astrocytes	TRAF4	51.8172	-0.575216	0.136748	-4.2064	2.59467e-05	0.00272538
Astrocytes	USP51	10.7644	-0.448557	0.10669	-4.20432	2.61872e-05	0.00272538
Astrocytes	MATN2	139.035	1.0194	0.242753	4.19934	2.67698e-05	0.00274689
Astrocytes	COL4A2	155.344	0.669367	0.159371	4.20005	2.6686e-05	0.00274689
Astrocytes	TECTA	22.9676	-0.437997	0.104331	-4.19816	2.69095e-05	0.00274789
Astrocytes	P2RY1	99.5908	-0.434079	0.103477	-4.19492	2.72973e-05	0.00277295
Astrocytes	HTRA1	416.768	-0.483017	0.115171	-4.19392	2.74172e-05	0.00277295
Astrocytes	AC073050.1	2071.71	-0.429971	0.102567	-4.19208	2.76405e-05	0.00278221
Astrocytes	AC007389.1	989.407	-0.551112	0.131638	-4.18656	2.83211e-05	0.00279744
Astrocytes	STXBP1	165.101	0.324436	0.0774919	4.18671	2.83026e-05	0.00279744
Astrocytes	PGM2L1	49.0544	0.784382	0.187289	4.18809	2.81308e-05	0.00279744
Astrocytes	HPN	43.9592	0.69183	0.165155	4.18896	2.80231e-05	0.00279744
Astrocytes	ZDHHC3	75.7562	0.541757	0.12946	4.18475	2.85474e-05	0.00280667
Astrocytes	TRIM26	70.1557	-0.523176	0.125157	-4.18015	2.91314e-05	0.00283769
Astrocytes	SYT3	2.77929	0.852495	0.203899	4.18097	2.9027e-05	0.00283769
Astrocytes	PXDNL	39.7342	-0.48934	0.117167	-4.17641	2.96139e-05	0.00287147
Astrocytes	C1orf87	26.2256	0.942887	0.226011	4.17186	3.02123e-05	0.00288971
Astrocytes	ADGRV1	8518.42	-0.369629	0.0885962	-4.17207	3.01846e-05	0.00288971
Astrocytes	C1R	46.2477	0.896613	0.214821	4.17377	2.99605e-05	0.00288971
Astrocytes	ZNF277	297.064	-0.421974	0.101184	-4.17037	3.04103e-05	0.00289555
Astrocytes	CYFIP2	489.677	-0.326807	0.0783957	-4.16869	3.06354e-05	0.00290391
Astrocytes	CDH23	148.421	0.683801	0.164081	4.16746	3.08016e-05	0.00290663
Astrocytes	ARHGAP5	1506.29	-0.399965	0.0960665	-4.16341	3.13525e-05	0.00294546
Astrocytes	TELO2	25.3526	-0.403108	0.0969276	-4.15885	3.19849e-05	0.00299157
Astrocytes	HSPD1	212.524	-0.938524	0.225844	-4.15563	3.2439e-05	0.00302069
Astrocytes	MAL	79.8057	-0.388854	0.0936035	-4.15426	3.26339e-05	0.0030255
Astrocytes	CACTIN	12.8003	-0.41604	0.100197	-4.15221	3.29283e-05	0.00303947
Astrocytes	ICAM1	15.7794	1.13708	0.273994	4.15	3.32474e-05	0.00304903
Astrocytes	LIMK2	166.484	0.720162	0.173554	4.1495	3.33204e-05	0.00304903
Astrocytes	BTBD9	961.634	-0.257151	0.0620365	-4.14515	3.39595e-05	0.00306958
Astrocytes	CTHRC1	2.84856	0.938984	0.226437	4.14677	3.37195e-05	0.00306958
Astrocytes	ARFGAP2	70.6696	-0.265862	0.0641404	-4.14501	3.39806e-05	0.00306958
Astrocytes	AUTS2	2437.39	-0.309476	0.0747405	-4.14067	3.46287e-05	0.00311481
Astrocytes	VANGL2	34.6414	-0.379141	0.0916174	-4.13831	3.49873e-05	0.00313373
Astrocytes	ZEB2	502.538	-0.362113	0.0875649	-4.13537	3.54384e-05	0.00316074
Astrocytes	ST6GAL1	168.575	0.89931	0.217778	4.12948	3.63591e-05	0.00322924
Astrocytes	NUP62CL	5.68128	-1.16058	0.28112	-4.12843	3.65249e-05	0.00323039
Astrocytes	C12orf50	2.48488	-1.05535	0.255914	-4.12386	3.72579e-05	0.00328149
Astrocytes	RORB	1218.26	-0.446739	0.108371	-4.1223	3.75112e-05	0.00329009
Astrocytes	ARPC1B	9.1423	0.622824	0.151217	4.11876	3.80921e-05	0.00332724
Astrocytes	AL117353.1	4.26271	-0.921334	0.223797	-4.11684	3.84111e-05	0.00334129
Astrocytes	ATP2C1	699.748	-0.702197	0.170673	-4.11428	3.88396e-05	0.00336472
Astrocytes	AC114971.1	1619.64	-0.471363	0.114637	-4.11179	3.92607e-05	0.00338732
Astrocytes	ATL2	301.832	-0.465479	0.113323	-4.10753	3.99905e-05	0.00343626
Astrocytes	SOX21-AS1	187.72	-0.519548	0.126564	-4.10503	4.04256e-05	0.00344563
Astrocytes	CDH20	5522.51	-0.49236	0.119928	-4.10546	4.03512e-05	0.00344563
Astrocytes	AL137140.1	4.43204	-1.02163	0.249175	-4.10005	4.13068e-05	0.0035066
Astrocytes	MRPL39	48.8824	-0.363455	0.0886956	-4.09778	4.17136e-05	0.00352697
Astrocytes	C11orf65	130.477	-0.449103	0.109629	-4.09658	4.1929e-05	0.00353106
Astrocytes	TBC1D9B	73.1797	0.274523	0.0670607	4.09365	4.2464e-05	0.00356192
Astrocytes	ARHGAP31-AS1	12.4308	0.682483	0.166794	4.09177	4.28095e-05	0.0035767
Astrocytes	AC104964.1	22.4287	0.584674	0.142976	4.08932	4.32643e-05	0.00360048
Astrocytes	BZW1	114.437	-0.301287	0.0737533	-4.08507	4.40642e-05	0.003646
Astrocytes	GDPD5	8.47686	0.87995	0.215432	4.08458	4.41564e-05	0.003646
Astrocytes	SESN3	533.343	-0.59101	0.144756	-4.08281	4.44948e-05	0.00365965
Astrocytes	NAV3	4345.7	-0.39309	0.0963729	-4.07884	4.52601e-05	0.00370817
Astrocytes	C1orf54	77.9469	-0.543814	0.133551	-4.07196	4.66197e-05	0.00379013
Astrocytes	CELF2	2574.76	-0.355698	0.0873698	-4.07118	4.67755e-05	0.00379013
Astrocytes	TRHDE	18.8708	0.707533	0.173796	4.07107	4.67983e-05	0.00379013
Astrocytes	RRBP1	100.881	0.410996	0.101029	4.0681	4.73988e-05	0.00382411
Astrocytes	LINC01891	1.19458	-1.15254	0.283426	-4.06646	4.77337e-05	0.00382527
Astrocytes	AC003044.1	11.1276	-0.927232	0.22813	-4.06449	4.81371e-05	0.00382527
Astrocytes	ABCC3	5.77095	1.53507	0.3776	4.06534	4.79632e-05	0.00382527
Astrocytes	OPHN1	2069.32	-0.369944	0.0910138	-4.0647	4.80934e-05	0.00382527
Astrocytes	EPHA7	24.4616	0.680485	0.167571	4.06087	4.889e-05	0.00384177
Astrocytes	AL589740.1	4848.91	-0.469597	0.115613	-4.06182	4.86925e-05	0.00384177
Astrocytes	AC099508.1	2.54705	-0.984739	0.242486	-4.06101	4.88604e-05	0.00384177
Astrocytes	KIAA1755	326.088	0.369619	0.0910866	4.05788	4.95193e-05	0.00387681
Astrocytes	EPB41L2	684.435	-0.350754	0.0864572	-4.05697	4.9713e-05	0.00387761
Astrocytes	MIR2052HG	163.271	-0.733384	0.180916	-4.05373	5.04082e-05	0.00391738
Astrocytes	AC091826.2	796.39	-0.610949	0.150804	-4.05128	5.09391e-05	0.00394414
Astrocytes	AC125618.1	28.1298	-0.581926	0.143729	-4.04877	5.14885e-05	0.00395363
Astrocytes	NKAIN3	4057.91	-0.449694	0.111086	-4.04816	5.16227e-05	0.00395363
Astrocytes	ZHX3	1807.85	-0.363094	0.0896906	-4.04829	5.15928e-05	0.00395363
Astrocytes	TMEM209	53.8513	-0.339653	0.0839698	-4.04494	5.23364e-05	0.00399382
Astrocytes	MYOF	18.9628	1.26485	0.31283	4.04326	5.27139e-05	0.00400815
Astrocytes	FHDC1	9.13699	1.05831	0.261894	4.041	5.32237e-05	0.00401138
Astrocytes	PRAG1	91.9944	-0.593018	0.146733	-4.04147	5.31181e-05	0.00401138
Astrocytes	LURAP1L	4.29677	0.767169	0.189867	4.04055	5.33256e-05	0.00401138
Astrocytes	TRIP10	18.6096	0.932513	0.230871	4.0391	5.36561e-05	0.00402192
Astrocytes	AK7	4.64223	0.841786	0.208571	4.03598	5.43757e-05	0.00406146
Astrocytes	ESRRG	1253.18	-0.544523	0.135042	-4.03225	5.52462e-05	0.00409403
Astrocytes	GLI3	1115.14	-0.366159	0.0907971	-4.03272	5.51344e-05	0.00409403
Astrocytes	AC004448.2	3.70375	0.775053	0.192282	4.0308	5.55864e-05	0.00409403
Astrocytes	HPN-AS1	21.3877	0.709625	0.176035	4.03116	5.5502e-05	0.00409403
Astrocytes	AC008543.1	10.8117	-0.647506	0.160709	-4.02907	5.59988e-05	0.00411008
Astrocytes	KIAA1958	693.53	-0.350771	0.087213	-4.02201	5.77034e-05	0.00420598
Astrocytes	JMJD1C	1122.82	-0.246886	0.0613818	-4.02214	5.7672e-05	0.00420598
Astrocytes	AL354743.2	7.33916	1.12305	0.279993	4.01098	6.04661e-05	0.0043922
Astrocytes	ETNPPL	794.692	-0.59177	0.147612	-4.00895	6.099e-05	0.00441509
Astrocytes	IL27RA	2.90068	0.931718	0.232619	4.00534	6.19274e-05	0.00446765
Astrocytes	AC018754.1	16.7592	-0.585571	0.146311	-4.00223	6.27484e-05	0.00449992
Astrocytes	PSMB9	15.9112	0.707828	0.176867	4.00203	6.28004e-05	0.00449992
Astrocytes	PIEZO1	86.8896	-0.37495	0.0937354	-4.00009	6.33175e-05	0.00452164
Astrocytes	KCTD12	9.17532	0.675844	0.169035	3.99824	6.38141e-05	0.00454176
Astrocytes	SOX2	358.248	-0.386933	0.0968718	-3.99427	6.48929e-05	0.00460304
Astrocytes	CYP7B1	295.603	-0.432843	0.10847	-3.99044	6.59517e-05	0.0046625
Astrocytes	AL158071.1	5.06944	0.872912	0.218878	3.98813	6.65966e-05	0.0046924
Astrocytes	SOX9	438.914	-0.443732	0.111304	-3.98666	6.70106e-05	0.00470588
Astrocytes	AP003352.1	1.63842	1.15903	0.290796	3.98572	6.72747e-05	0.00470688
Astrocytes	ARNTL2	9.00083	0.958816	0.240604	3.98503	6.74702e-05	0.00470688
Astrocytes	MAPK10	4286.46	-0.341369	0.0856994	-3.98333	6.79565e-05	0.00472521
Astrocytes	LSAMP	22565.6	-0.347011	0.0871593	-3.98134	6.85275e-05	0.00474146
Astrocytes	NCBP1	112.307	-0.297136	0.0746394	-3.98096	6.86388e-05	0.00474146
Astrocytes	UBE3D	159.587	-0.480058	0.120659	-3.97862	6.93154e-05	0.00474561
Astrocytes	AC092131.1	23.2192	1.21396	0.305136	3.97843	6.93724e-05	0.00474561
Astrocytes	SLC16A6	13.3971	-1.02325	0.25718	-3.97874	6.92808e-05	0.00474561
Astrocytes	FOSB	2.96495	-1.51054	0.379921	-3.97593	7.01034e-05	0.00478015
Astrocytes	BICRA	15.5572	-0.403424	0.10156	-3.97227	7.11903e-05	0.00483865
Astrocytes	ACTN1	176.561	0.86507	0.217909	3.96986	7.1915e-05	0.00487041
Astrocytes	AP000282.1	61.8974	-0.73165	0.184332	-3.96919	7.21184e-05	0.00487041
Astrocytes	ELP4	681.041	-0.337473	0.0850403	-3.96839	7.23609e-05	0.00487123
Astrocytes	GRM3	1160.53	-0.668209	0.16847	-3.96634	7.29861e-05	0.00489771
Astrocytes	SNTA1	333.107	-0.422006	0.106472	-3.96355	7.38438e-05	0.00493959
Astrocytes	ZW10	33.3166	-0.277401	0.0700096	-3.96233	7.42228e-05	0.00494928
Astrocytes	CNR1	8.79876	0.911683	0.230156	3.96115	7.45886e-05	0.00495803
Astrocytes	C4A	2.16747	1.21221	0.30623	3.9585	7.54207e-05	0.00499763
Astrocytes	CAMK4	190.906	-0.690488	0.174583	-3.95506	7.65145e-05	0.00500732
Astrocytes	HIBADH	259.994	-0.324417	0.0819854	-3.95701	7.58949e-05	0.00500732
Astrocytes	AL158828.1	3.04337	-1.03746	0.262237	-3.9562	7.61525e-05	0.00500732
Astrocytes	ACACA	588.327	-0.239611	0.0605753	-3.95559	7.63472e-05	0.00500732
Astrocytes	TST	25.4018	-0.456732	0.115559	-3.95237	7.7381e-05	0.00504839
Astrocytes	RNF103	80.2156	-0.349816	0.0885785	-3.94922	7.84048e-05	0.00507801
Astrocytes	IKBKB	94.146	0.2326	0.0589007	3.94902	7.84703e-05	0.00507801
Astrocytes	ZNF44	180.595	-0.357014	0.0904116	-3.94876	7.85556e-05	0.00507801
Astrocytes	COL4A1	49.182	0.982958	0.249246	3.94373	8.0225e-05	0.00517011
Astrocytes	PDGFC	403.146	-0.387402	0.0982667	-3.94235	8.06861e-05	0.00518402
Astrocytes	AC004158.1	132.757	-0.664099	0.168501	-3.94122	8.10676e-05	0.00519275
Astrocytes	FBXL8	6.98207	0.535813	0.136049	3.93839	8.20319e-05	0.00523864
Astrocytes	SHROOM3	1274.45	-0.427111	0.108479	-3.93728	8.24088e-05	0.00524154
Astrocytes	NUMBL	71.7654	0.572942	0.145535	3.93681	8.25732e-05	0.00524154
Astrocytes	PLSCR1	244.798	1.0097	0.256536	3.93591	8.28837e-05	0.0052455
Astrocytes	STAMBPL1	72.3353	0.60789	0.154477	3.93515	8.31441e-05	0.00524627
Astrocytes	DAB2	3.71017	1.21237	0.308342	3.93191	8.42746e-05	0.00530177
Astrocytes	ACBD7	64.8695	-0.442395	0.112566	-3.9301	8.49102e-05	0.00532591
Astrocytes	TMEM163	13.4954	0.872397	0.222253	3.92524	8.66421e-05	0.00539389
Astrocytes	TMEM178B	695.361	-0.37274	0.0949675	-3.92492	8.67595e-05	0.00539389
Astrocytes	WNK3	96.9475	-0.342933	0.0873665	-3.92522	8.66489e-05	0.00539389
Astrocytes	CDC7	43.3362	0.947395	0.241467	3.9235	8.72705e-05	0.00540975
Astrocytes	MIR181A1HG	92.9428	-0.711052	0.181286	-3.92227	8.77173e-05	0.00542154
Astrocytes	FMNL2	2677.86	-0.299551	0.0764089	-3.92036	8.84169e-05	0.00544672
Astrocytes	NR4A2	64.9539	-0.600839	0.153285	-3.91975	8.86399e-05	0.00544672
Astrocytes	POC1A	5.27969	0.937839	0.239563	3.9148	9.04804e-05	0.0055379
Astrocytes	CNTFR	167.999	-0.49629	0.126788	-3.91433	9.06555e-05	0.0055379
Astrocytes	ZIC2	68.6729	-0.448964	0.114717	-3.91365	9.09098e-05	0.0055379
Astrocytes	APPL2	356.316	-0.31761	0.0812268	-3.91017	9.22327e-05	0.00557033
Astrocytes	CLK3	41.6359	-0.322788	0.082527	-3.9113	9.17999e-05	0.00557033
Astrocytes	AL157700.1	12.2673	-0.683268	0.17474	-3.91019	9.22229e-05	0.00557033
Astrocytes	KCNC1	27.6056	0.709927	0.181607	3.90914	9.26263e-05	0.00557816
Astrocytes	KIAA0040	5.64887	1.9605	0.501745	3.90737	9.33065e-05	0.00560316
Astrocytes	AGAP4	38.5666	-0.348436	0.0892617	-3.90353	9.47986e-05	0.00567664
Astrocytes	CAPN10-DT	11.7219	0.425316	0.109015	3.90143	9.56247e-05	0.00567785
Astrocytes	LINC02666	60.8392	-0.426215	0.109232	-3.90191	9.54357e-05	0.00567785
Astrocytes	GALNT16	118.654	1.03675	0.265692	3.90206	9.53792e-05	0.00567785
Astrocytes	AC005740.5	4.83157	-0.718269	0.184143	-3.9006	9.59546e-05	0.00568148
Astrocytes	BTBD19	7.54394	0.745389	0.191222	3.89802	9.6981e-05	0.00572621
Astrocytes	PI15	10.9432	-0.751969	0.192985	-3.89652	9.75834e-05	0.00573796
Astrocytes	GPC5	15620.9	-0.431709	0.110803	-3.89618	9.77228e-05	0.00573796
Astrocytes	FAM110B	162.368	-0.369704	0.0949367	-3.89422	9.85162e-05	0.00576852
Astrocytes	FMR1	106.837	-0.273669	0.0703485	-3.89019	0.000100167	0.00584896
Astrocytes	ERRFI1	106.401	-0.338322	0.0870098	-3.88832	0.00010094	0.00587789
Astrocytes	AL022068.1	449.3	-0.524556	0.13502	-3.88501	0.000102327	0.00592597
Astrocytes	MIR99AHG	6782	-0.330228	0.0849862	-3.88566	0.000102051	0.00592597
Astrocytes	FAM71F1	4.04399	-1.01564	0.261476	-3.88426	0.000102641	0.00592794
Astrocytes	MEF2C-AS2	58.2926	-0.661178	0.170459	-3.87882	0.000104966	0.00603048
Astrocytes	MINDY3	151.699	-0.306545	0.0790316	-3.87877	0.000104987	0.00603048
Astrocytes	KCNIP2	22.2328	-0.378562	0.0976385	-3.87718	0.000105675	0.00605355
Astrocytes	GPATCH4	11.1882	0.565149	0.145937	3.87255	0.000107702	0.00608792
Astrocytes	SPATA12	5.92685	1.45711	0.376331	3.87187	0.000108003	0.00608792
Astrocytes	ALDH7A1	456.193	-0.393528	0.101617	-3.87265	0.000107659	0.00608792
Astrocytes	STRIP2	75.8882	-0.513173	0.132459	-3.87421	0.000106971	0.00608792
Astrocytes	ABCC9	451.821	0.596303	0.154006	3.87195	0.000107966	0.00608792
Astrocytes	TVP23C	206.334	-0.332356	0.0858059	-3.87335	0.000107351	0.00608792
Astrocytes	ZNF682	46.1526	-0.492665	0.127302	-3.87004	0.000108818	0.00611751
Astrocytes	ADGRL3	4990.01	-0.421766	0.109099	-3.86589	0.000110686	0.00618965
Astrocytes	SERPINB1	16.91	0.874896	0.226305	3.86601	0.00011063	0.00618965
Astrocytes	PLCL1	241.026	-0.577616	0.149497	-3.86373	0.000111667	0.00619529
Astrocytes	LINC00683	19.3286	-0.648568	0.16784	-3.8642	0.000111454	0.00619529
Astrocytes	FRMPD3	60.508	1.10576	0.286114	3.86473	0.000111211	0.00619529
Astrocytes	CDC37L1-DT	7.33445	-0.515263	0.133419	-3.86199	0.000112469	0.0062235
Astrocytes	BRINP2	376.091	-0.559882	0.145045	-3.86006	0.000113361	0.00622394
Astrocytes	BCL6	948.956	0.598951	0.155123	3.86115	0.000112857	0.00622394
Astrocytes	AC097534.1	5.03699	-0.626744	0.162341	-3.86067	0.000113077	0.00622394
Astrocytes	HIST2H2BF	9.87161	-1.00632	0.260792	-3.85872	0.000113982	0.00622798
Astrocytes	AC074351.1	24.7334	-0.749698	0.194323	-3.858	0.000114318	0.00622798
Astrocytes	ZNF763	31.6425	-0.492891	0.127744	-3.85844	0.000114113	0.00622798
Astrocytes	SLC19A2	58.7602	-0.455141	0.118036	-3.85594	0.000115286	0.00626454
Astrocytes	BLCAP	88.7449	-0.32464	0.0842086	-3.85519	0.000115642	0.00626778
Astrocytes	ITPRIPL2	60.8421	0.545073	0.141484	3.85255	0.000116894	0.00631945
Astrocytes	AC007402.1	181.421	-0.693296	0.180048	-3.85062	0.00011782	0.00635326
Astrocytes	RGCC	102.307	-0.789496	0.205098	-3.84935	0.000118431	0.00635801
Astrocytes	AC104574.2	163.157	0.786218	0.204255	3.84919	0.00011851	0.00635801
Astrocytes	GATAD1	245.01	0.279249	0.0725817	3.84737	0.000119392	0.00638127
Astrocytes	SOCS2-AS1	8.65823	0.957885	0.249032	3.84644	0.000119849	0.00638127
Astrocytes	AP1B1	100.269	-0.223676	0.0581507	-3.84649	0.000119822	0.00638127
Astrocytes	COL19A1	8.3588	0.721809	0.187716	3.84521	0.000120447	0.00639701
Astrocytes	NIPAL3	55.7619	0.322142	0.0838442	3.84215	0.000121959	0.00643164
Astrocytes	SOX6	1972.84	-0.329054	0.0856622	-3.84129	0.000122388	0.00643164
Astrocytes	TLCD5	70.242	-0.35612	0.0927037	-3.84149	0.000122288	0.00643164
Astrocytes	NPAS3	16234.9	-0.330786	0.0860766	-3.84293	0.000121575	0.00643164
Astrocytes	GAS7	56.7414	0.537556	0.139958	3.84083	0.00012262	0.00643164
Astrocytes	LRRC55	4.63042	1.32129	0.344068	3.84019	0.000122942	0.00643252
Astrocytes	ARHGAP39	173.747	0.588996	0.153406	3.83946	0.000123307	0.00643572
Astrocytes	TJP1	1334.31	-0.220162	0.0573635	-3.83802	0.00012403	0.00645748
Astrocytes	GCKR	10.3285	0.995517	0.259674	3.83372	0.000126221	0.00655541
Astrocytes	AC112250.2	2.4648	-1.15745	0.302056	-3.8319	0.000127157	0.00657174
Astrocytes	FAT3	1096.17	-0.460098	0.120066	-3.83203	0.000127088	0.00657174
Astrocytes	CTPS1	16.9584	0.42404	0.110782	3.82771	0.000129343	0.0066684
Astrocytes	FN1	117.745	0.803211	0.209928	3.82613	0.000130171	0.00667854
Astrocytes	CASP3	63.2958	-0.313291	0.0818811	-3.82617	0.000130153	0.00667854
Astrocytes	CCDC15	29.0313	-0.568425	0.148665	-3.82353	0.000131556	0.00673324
Astrocytes	ARHGAP5-AS1	16.8436	-0.624592	0.163624	-3.81723	0.000134956	0.00689058
Astrocytes	PARVB	39.5979	-0.616409	0.161509	-3.81657	0.000135322	0.00689263
Astrocytes	LIMS2	1.61698	1.29826	0.340311	3.81491	0.000136231	0.00692224
Astrocytes	IMPACT	27.583	-0.3887	0.101922	-3.81372	0.000136893	0.00693919
Astrocytes	GRK5	50.2635	0.660925	0.173433	3.81085	0.000138491	0.00700339
Astrocytes	AC063944.1	29.1847	-0.495081	0.12994	-3.81009	0.000138918	0.00700825
Astrocytes	LMO4	222.731	0.342809	0.0900504	3.80685	0.000140746	0.00708352
Astrocytes	ZNF462	515.139	-0.370362	0.0973071	-3.80612	0.000141164	0.00708773
Astrocytes	AL354740.1	106.545	0.672151	0.17672	3.80348	0.000142677	0.00712234
Astrocytes	ARSG	51.8592	-0.707108	0.185984	-3.80199	0.000143538	0.00712234
Astrocytes	GAREM1	1267.62	-0.28902	0.0759962	-3.80309	0.000142901	0.00712234
Astrocytes	AC025887.2	39.5815	-0.60838	0.160013	-3.80206	0.000143498	0.00712234
Astrocytes	PLCG1	227.132	-0.282909	0.0743767	-3.80373	0.000142534	0.00712234
Astrocytes	FAM199X	138.387	-0.44375	0.116776	-3.80001	0.000144691	0.0071627
Astrocytes	RBMS2	147.961	-0.283898	0.0747298	-3.79899	0.000145285	0.00717533
Astrocytes	AC097717.1	6.39254	-0.707189	0.186232	-3.79735	0.000146253	0.00718951
Astrocytes	PXDC1	42.266	0.722429	0.19023	3.79766	0.000146069	0.00718951
Astrocytes	DCUN1D1	343.857	-0.416322	0.109692	-3.79538	0.000147415	0.00721308
Astrocytes	KDR	1.34561	1.3843	0.364718	3.79554	0.000147323	0.00721308
Astrocytes	TPST1	1036.61	0.947961	0.249994	3.79193	0.00014948	0.00724826
Astrocytes	TAS2R3	1.17871	-1.08516	0.286052	-3.79356	0.000148502	0.00724826
Astrocytes	DEAF1	124.696	0.4673	0.123237	3.79189	0.000149505	0.00724826
Astrocytes	ZFHX3	852.823	-0.254464	0.0670877	-3.793	0.000148836	0.00724826
Astrocytes	AP003464.1	14.8481	0.89103	0.2351	3.79	0.000150647	0.00728688
Astrocytes	ABI1	1083.98	-0.334236	0.0882195	-3.78868	0.000151449	0.0072923
Astrocytes	RHOJ	534.49	-0.39496	0.104246	-3.78872	0.000151427	0.0072923
Astrocytes	SLC16A7	32.9683	0.677516	0.178884	3.78747	0.000152189	0.00731132
Astrocytes	SLC35G2	171.133	-0.379607	0.100249	-3.78664	0.000152699	0.00731916
Astrocytes	AL022318.5	11.6799	-0.639301	0.168944	-3.7841	0.000154267	0.00737758
Astrocytes	MRPL33	103.47	-0.314087	0.083093	-3.77995	0.000156861	0.00740695
Astrocytes	AC073636.1	2.81022	-0.959649	0.253864	-3.78017	0.000156723	0.00740695
Astrocytes	HLA-DPA1	1.70488	1.29189	0.341792	3.77976	0.000156979	0.00740695
Astrocytes	AL137017.1	39.2664	-0.734578	0.194339	-3.77988	0.000156902	0.00740695
Astrocytes	PRTG	89.4574	-0.653245	0.172812	-3.78009	0.000156772	0.00740695
Astrocytes	TLE2	9.00999	0.903823	0.239122	3.77975	0.000156983	0.00740695
Astrocytes	GANAB	71.829	-0.224369	0.0593735	-3.77893	0.000157502	0.00741489
Astrocytes	ELOVL6	239.621	-0.300197	0.0794919	-3.77644	0.000159085	0.00747274
Astrocytes	HJV	2.14623	-1.49411	0.395854	-3.77441	0.000160388	0.00751725
Astrocytes	RAB29	48.4579	0.325782	0.0863326	3.77357	0.000160925	0.00752575
Astrocytes	TAOK3	780.172	-0.284011	0.0753103	-3.77121	0.000162455	0.00758052
Astrocytes	ZBTB20	7842.41	-0.317809	0.0843102	-3.76952	0.000163563	0.00759865
Astrocytes	SHLD2	147.426	-0.342553	0.0908629	-3.77	0.000163248	0.00759865
Astrocytes	CLCF1	4.57895	1.24337	0.330001	3.76777	0.000164712	0.00763527
Astrocytes	AP4B1	21.71	-0.469001	0.124619	-3.76349	0.000167555	0.00766888
Astrocytes	OTX1	19.2828	-0.414055	0.110043	-3.76266	0.000168114	0.00766888
Astrocytes	NSG1	17.072	0.939956	0.249895	3.7614	0.000168963	0.00766888
Astrocytes	SH3RF1	657.666	-0.4808	0.127727	-3.76427	0.000167035	0.00766888
Astrocytes	AC025171.1	67.254	-0.437351	0.116269	-3.76155	0.000168862	0.00766888
Astrocytes	CEP85L	990.333	-0.340336	0.0904848	-3.76125	0.000169065	0.00766888
Astrocytes	SLC20A2	398.692	0.343444	0.0912445	3.764	0.000167218	0.00766888
Astrocytes	TRPS1	3694.2	-0.393993	0.104715	-3.76254	0.000168195	0.00766888
Astrocytes	RIMKLB	358.158	-0.263044	0.069864	-3.76508	0.000166493	0.00766888
Astrocytes	Z82215.1	5.80484	1.18293	0.314314	3.76351	0.000167542	0.00766888
Astrocytes	ANO7	14.5034	0.705685	0.187806	3.75751	0.000171609	0.00776561
Astrocytes	UNC5D	279.198	-0.568443	0.151301	-3.75704	0.000171932	0.00776561
Astrocytes	AC009948.2	3.15037	-0.74982	0.199728	-3.75421	0.000173889	0.00782057
Astrocytes	TAS2R14	13.5433	-0.454624	0.121097	-3.75421	0.000173888	0.00782057
Astrocytes	FAM184A	949.621	-0.37577	0.100134	-3.75266	0.000174969	0.00785242
Astrocytes	EYA1	745.436	-0.476454	0.126987	-3.752	0.000175433	0.00785656
Astrocytes	PDLIM5	944.949	-0.301909	0.0804997	-3.75044	0.000176522	0.00788865
Astrocytes	UGCG	150.232	0.706006	0.188302	3.74934	0.000177303	0.0079068
Astrocytes	AGMO	49.158	-0.709618	0.189299	-3.74866	0.00017778	0.00791141
Astrocytes	NOL4	733.52	-0.375905	0.100309	-3.74746	0.000178635	0.00793274
Astrocytes	COL5A2	109.128	-0.534912	0.142783	-3.74634	0.000179437	0.00795165
Astrocytes	TSPAN2	1.61069	1.62751	0.434639	3.74451	0.000180747	0.00797627
Astrocytes	TMEM263	42.3601	-0.260246	0.069497	-3.74471	0.000180601	0.00797627
Astrocytes	FAM171B	957.578	-0.515583	0.137718	-3.74375	0.000181293	0.00797951
Astrocytes	LINC01982	16.3079	0.916899	0.244974	3.74284	0.000181953	0.00797951
Astrocytes	AC010615.2	9.34782	0.726529	0.194096	3.74313	0.000181741	0.00797951
Astrocytes	MYO18A	174.199	0.372208	0.0994628	3.74218	0.000182429	0.00798383
Astrocytes	TRPM4	37.5576	-0.524168	0.140217	-3.73825	0.000185305	0.00809291
Astrocytes	MEIS1	215.121	-0.417363	0.111717	-3.73589	0.000187049	0.00815226
Astrocytes	LYPLAL1-DT	157.881	-0.45415	0.121715	-3.73125	0.000190534	0.00818369
Astrocytes	AL359764.3	10.4053	-0.685387	0.183657	-3.73188	0.000190057	0.00818369
Astrocytes	C2orf16	11.1082	0.948725	0.254322	3.73041	0.000191166	0.00818369
Astrocytes	ACYP2	885.196	-0.251085	0.0672969	-3.731	0.000190721	0.00818369
Astrocytes	ADD2	22.5523	0.651407	0.174591	3.73105	0.000190685	0.00818369
Astrocytes	ELOVL2	330.187	-0.409201	0.109697	-3.7303	0.000191255	0.00818369
Astrocytes	SLC35F1	1470.51	-0.403245	0.108051	-3.73198	0.000189981	0.00818369
Astrocytes	SOCS3	44.2347	1.80188	0.482932	3.73112	0.000190633	0.00818369
Astrocytes	DCXR	55.6035	-0.514787	0.13791	-3.73278	0.00018938	0.00818369
Astrocytes	SLX4IP	270.827	-0.348512	0.0934467	-3.72953	0.000191837	0.00819203
Astrocytes	APCDD1	392.259	-0.389463	0.104474	-3.72783	0.000193132	0.00823071
Astrocytes	AC018638.6	11.6423	-0.540001	0.14492	-3.72619	0.000194398	0.00826797
Astrocytes	NCK1	130.705	-0.260441	0.0699106	-3.72534	0.000195049	0.008279
Astrocytes	RTL10	15.7867	0.389208	0.104509	3.72418	0.000195955	0.00830079
Astrocytes	CDH10	594.381	-0.575331	0.154575	-3.72201	0.00019764	0.00834366
Astrocytes	IGFL4	32.3475	-0.611954	0.164421	-3.72187	0.000197756	0.00834366
Astrocytes	GABBR1	541.205	-0.386613	0.103897	-3.72113	0.000198335	0.00835141
Astrocytes	SH3BGR	163.598	-1.0629	0.285877	-3.71804	0.000200773	0.00843726
Astrocytes	FAM20C	166.629	0.815911	0.219476	3.71753	0.000201177	0.00843747
Astrocytes	CD82	59.1973	0.447082	0.12035	3.71484	0.000203336	0.00851112
Astrocytes	AC040168.1	236.468	-0.370005	0.0996803	-3.71191	0.000205698	0.00859297
Astrocytes	GPHN	2481.4	-0.306115	0.0824818	-3.71131	0.000206189	0.00859649
Astrocytes	TTC39A	3.54496	0.939888	0.253538	3.70709	0.000209651	0.00866162
Astrocytes	MBD5	1658.13	-0.260295	0.0702075	-3.70751	0.00020931	0.00866162
Astrocytes	F11-AS1	868.82	-0.499667	0.134811	-3.70642	0.00021021	0.00866162
Astrocytes	AC009185.1	2.69118	-0.909947	0.245504	-3.70644	0.000210195	0.00866162
Astrocytes	RNF139	27.0492	-0.329002	0.0887375	-3.70759	0.000209241	0.00866162
Astrocytes	TLE1	423.253	-0.361915	0.0975866	-3.70865	0.000208364	0.00866162
Astrocytes	PDE7B	1398.2	-0.379035	0.102291	-3.70547	0.000210999	0.00867724
Astrocytes	ERVMER61-1	33.3931	-0.605096	0.163365	-3.70394	0.000212274	0.00871271
Astrocytes	ADAM12	203.2	0.620226	0.167493	3.703	0.000213069	0.00872838
Astrocytes	MAPK8	577.759	-0.305623	0.0825664	-3.70155	0.000214289	0.00876139
Astrocytes	IL1R1	35.6078	0.917667	0.247952	3.70098	0.000214765	0.00876175
Astrocytes	FAM104A	30.7255	-0.325183	0.087874	-3.70056	0.000215127	0.00876175
Astrocytes	OSMR	296.343	0.863449	0.233421	3.6991	0.000216361	0.00879508
Astrocytes	ATXN1	954.867	-0.288356	0.0780003	-3.69686	0.000218282	0.00885615
Astrocytes	ADCY5	35.8187	0.499934	0.135294	3.69516	0.000219744	0.00889013
Astrocytes	EXT1	570.393	-0.299304	0.0810044	-3.69491	0.000219961	0.00889013
Astrocytes	NEFM	113.93	1.04946	0.284192	3.69278	0.000221814	0.00892934
Astrocytes	AL133216.1	2.30729	-0.903828	0.244784	-3.69234	0.000222198	0.00892934
Astrocytes	PCDH9	21667.5	-0.339029	0.0918189	-3.69237	0.000222176	0.00892934
Astrocytes	TCF4	2251.32	-0.335122	0.090802	-3.69068	0.000223653	0.00897074
Astrocytes	CCDC80	52.5364	0.69705	0.18901	3.6879	0.000226115	0.00905231
Astrocytes	AL157756.1	4.98293	-0.590297	0.160099	-3.68707	0.00022685	0.00906457
Astrocytes	NRG3	14886.7	-0.285303	0.0773961	-3.68628	0.000227559	0.00907573
Astrocytes	AC007100.1	5.9435	-0.985764	0.267756	-3.68158	0.000231792	0.00917712
Astrocytes	PPP3R1	426.975	-0.306958	0.083357	-3.68245	0.000231007	0.00917712
Astrocytes	SCN1A	82.345	0.705621	0.19169	3.68105	0.000232272	0.00917712
Astrocytes	AC006452.1	4.92033	-0.887979	0.241106	-3.68293	0.000230567	0.00917712
Astrocytes	TIGD7	23.9152	0.349319	0.0948866	3.68144	0.000231921	0.00917712
Astrocytes	NRIP3	5.41648	0.88732	0.241274	3.67765	0.000235392	0.00928304
Astrocytes	MALRD1	184.588	-0.526934	0.143334	-3.67627	0.000236669	0.00931602
Astrocytes	ZBTB18	100.124	-0.38505	0.10477	-3.67519	0.000237668	0.00933798
Astrocytes	AC015871.7	6.03108	-0.554052	0.150954	-3.67035	0.000242222	0.00949925
Astrocytes	FRS2	502.054	-0.266014	0.0725214	-3.66807	0.000244387	0.0095664
Astrocytes	AC010148.1	7.84379	-0.804727	0.219551	-3.66534	0.000247011	0.00965124
Astrocytes	SPPL3	417.148	-0.20468	0.0558858	-3.66247	0.000249794	0.00974196
Astrocytes	FBXL7	4049.45	-0.273679	0.0747752	-3.66002	0.000252197	0.00981759
Astrocytes	TGFBI	1.62	1.72157	0.470669	3.65771	0.000254479	0.0098882
Astrocytes	LRP1B	12783.7	-0.428244	0.117187	-3.65437	0.000257813	0.00993001
Astrocytes	FHIT	2828.85	-0.281614	0.0770641	-3.65428	0.000257904	0.00993001
Astrocytes	AL137003.2	5.95743	-0.499987	0.136819	-3.65437	0.00025781	0.00993001
Astrocytes	NT5E	109.929	-0.491559	0.134458	-3.65585	0.000256333	0.00993001
Astrocytes	TAFA2	147.388	-0.391787	0.107176	-3.65554	0.000256639	0.00993001
Astrocytes	LDHD	14.2763	-0.531126	0.145377	-3.65344	0.000258751	0.00994453
Astrocytes	SPON1	1337.7	-0.3947	0.108153	-3.64947	0.00026278	0.0100627
Astrocytes	TPM4	72.3356	0.801387	0.219564	3.6499	0.000262346	0.0100627
Astrocytes	NARF	80.1208	0.371431	0.101814	3.64811	0.000264173	0.0100978
Astrocytes	AC106793.1	88.876	-0.50935	0.139697	-3.64611	0.000266245	0.0101586
Astrocytes	AL031731.1	5.15136	0.861405	0.236358	3.6445	0.000267912	0.0102038
Astrocytes	ADAMTS3	50.1717	0.837057	0.229711	3.64396	0.00026848	0.0102071
Astrocytes	AL136984.1	8.8648	-0.623699	0.171522	-3.63626	0.000276628	0.0104121
Astrocytes	AL117350.1	5.38161	-0.728244	0.200283	-3.63607	0.000276829	0.0104121
Astrocytes	IFT22	18.8206	0.337632	0.0928139	3.63773	0.000275053	0.0104121
Astrocytes	LRRN3	125.048	-0.505957	0.139125	-3.6367	0.000276155	0.0104121
Astrocytes	C9orf85	153.754	-0.270466	0.0743628	-3.63711	0.000275709	0.0104121
Astrocytes	CLPB	76.2736	0.310318	0.0853215	3.63704	0.000275785	0.0104121
Astrocytes	FAM71F2	37.1773	-0.424171	0.116708	-3.63446	0.000278562	0.0104587
Astrocytes	BDH1	118.624	-0.347819	0.0957368	-3.63308	0.000280063	0.0104593
Astrocytes	AL513548.3	1.43785	-1.12529	0.309733	-3.63309	0.000280045	0.0104593
Astrocytes	GRIN2A	63.3339	0.625356	0.172109	3.63348	0.000279619	0.0104593
Astrocytes	DYNC2H1	611.598	-0.28407	0.0782194	-3.63171	0.000281544	0.0104961
Astrocytes	AC016773.1	2.73054	-1.46356	0.403162	-3.63022	0.000283185	0.0105372
Astrocytes	ZFAND2A	16.8574	-0.79601	0.219299	-3.6298	0.000283645	0.0105372
Astrocytes	GRIA2	1134.64	-0.468314	0.129062	-3.62859	0.000284977	0.0105681
Astrocytes	AGO1	68.4064	-0.275277	0.075886	-3.62751	0.000286172	0.0105939
Astrocytes	LINC02715	24.2938	-0.828074	0.22833	-3.62665	0.000287124	0.0106105
Astrocytes	SLC30A10	143.85	-0.486523	0.134223	-3.62474	0.000289249	0.0106704
Astrocytes	NFYC	193.584	-0.287482	0.079342	-3.62333	0.000290835	0.0106716
Astrocytes	SMYD5	17.2145	-0.349624	0.09647	-3.62417	0.000289891	0.0106716
Astrocytes	NEFL	133.443	1.01236	0.279434	3.62292	0.000291299	0.0106716
Astrocytes	SMARCA2	1071.43	-0.335111	0.0924911	-3.62317	0.000291016	0.0106716
Astrocytes	EPB41L5	290.703	-0.299325	0.0826366	-3.62219	0.000292123	0.0106832
Astrocytes	ROR1	386.711	-0.470485	0.129924	-3.62124	0.000293193	0.0107038
Astrocytes	DNER	467.409	0.500108	0.138145	3.62018	0.000294398	0.0107293
Astrocytes	BRINP3	1052.16	-0.560642	0.154887	-3.61968	0.000294972	0.0107317
Astrocytes	EPS8	455.707	-0.318997	0.0881883	-3.61723	0.000297776	0.0108151
Astrocytes	PPM1K	435.231	-0.359966	0.0995691	-3.61523	0.000300076	0.010868
Astrocytes	TMEM8B	60.1658	-0.266111	0.0736115	-3.61508	0.000300261	0.010868
Astrocytes	TBL1XR1	641.222	-0.296325	0.0820507	-3.61149	0.000304445	0.0109631
Astrocytes	ZSWIM6	2361.62	-0.37226	0.103052	-3.61235	0.000303431	0.0109631
Astrocytes	CDH2	957.143	-0.389189	0.107755	-3.61181	0.000304066	0.0109631
Astrocytes	TRPC3	4.24687	-0.79033	0.218989	-3.60899	0.000307387	0.0110503
Astrocytes	PIK3C2A	698.75	-0.402378	0.111592	-3.60581	0.000311184	0.0111488
Astrocytes	NBDY	174.709	-0.327224	0.0907435	-3.60603	0.000310921	0.0111488
Astrocytes	CDKN2C	6.68705	-0.564565	0.156618	-3.60473	0.000312475	0.0111761
Astrocytes	MMEL1	3.81575	1.0294	0.285731	3.60267	0.000314961	0.0111884
Astrocytes	TNR	96.2425	-0.631393	0.175256	-3.60268	0.000314949	0.0111884
Astrocytes	XPO1	673.152	-0.400145	0.111095	-3.60182	0.000315992	0.0111884
Astrocytes	MIR181A2HG	64.3001	-0.444568	0.123424	-3.60197	0.000315811	0.0111884
Astrocytes	PCCA	899.874	-0.291019	0.0807678	-3.60316	0.000314374	0.0111884
Astrocytes	TIMP2	82.0665	0.590546	0.163944	3.60213	0.000315626	0.0111884
Astrocytes	DAP3	172.145	0.400347	0.111313	3.5966	0.000322409	0.0113965
Astrocytes	NUAK2	7.08007	0.899399	0.25014	3.59559	0.000323662	0.0114217
Astrocytes	ABHD17B	84.0145	-0.31871	0.0886502	-3.59515	0.00032421	0.0114219
Astrocytes	KCNT2	29.5248	0.802554	0.223342	3.59339	0.000326402	0.01148
Astrocytes	CHEK2	11.3217	0.503811	0.140222	3.59295	0.000326956	0.0114804
Astrocytes	EGF	48.2226	0.798659	0.222393	3.5912	0.000329157	0.0115385
Astrocytes	PUM1	428.408	-0.200511	0.0559	-3.58695	0.000334565	0.0116893
Astrocytes	AP003068.2	11.4708	0.482836	0.134594	3.58734	0.000334062	0.0116893
Astrocytes	GPR22	11.4218	0.900599	0.25112	3.58633	0.000335359	0.0116977
Astrocytes	AC003101.1	2.97416	1.15265	0.321508	3.58512	0.00033692	0.0117328
Astrocytes	NOD1	73.1276	0.668292	0.186452	3.58425	0.000338047	0.0117527
Astrocytes	KDM5A	308.051	-0.254112	0.0709062	-3.58378	0.000338655	0.0117545
Astrocytes	GTDC1	384.934	-0.309611	0.0864382	-3.58188	0.000341133	0.0118211
Astrocytes	ZNF662	20.3915	-0.329719	0.0920975	-3.58011	0.000343446	0.0118818
Astrocytes	CARMIL1	2408.94	-0.313487	0.0875835	-3.5793	0.000344521	0.0118995
Astrocytes	QKI	5654.82	-0.240943	0.067324	-3.57886	0.000345102	0.0119001
Astrocytes	AL162456.1	13.8039	-0.468768	0.131015	-3.57798	0.00034626	0.0119206
Astrocytes	SPSB1	36.3773	1.01173	0.282901	3.57628	0.000348516	0.0119788
Astrocytes	NT5DC1	289.478	-0.35177	0.0984026	-3.57481	0.000350484	0.0119985
Astrocytes	AC002429.2	1586	-0.579588	0.162132	-3.57479	0.000350504	0.0119985
Astrocytes	A2M	26.1188	0.623445	0.174411	3.57458	0.000350792	0.0119985
Astrocytes	PLCD4	26.3045	-0.562046	0.157426	-3.57023	0.000356664	0.0121488
Astrocytes	KAT2B	714.985	-0.256081	0.0717174	-3.5707	0.000356029	0.0121488
Astrocytes	PARP10	39.5623	-0.368015	0.103084	-3.57005	0.000356913	0.0121488
Astrocytes	ABI2	555.239	-0.259913	0.072826	-3.56896	0.000358405	0.0121605
Astrocytes	AP003049.2	60.8219	-0.77644	0.21755	-3.56902	0.000358323	0.0121605
Astrocytes	SH3BGRL2	132.898	-0.37578	0.10543	-3.56426	0.000364882	0.0123409
Astrocytes	TRIP6	32.3884	-0.433916	0.121741	-3.56426	0.000364891	0.0123409
Astrocytes	RETREG3	74.7783	-0.267837	0.0751776	-3.56273	0.00036702	0.0123931
Astrocytes	TCEA3	45.5249	0.497772	0.139801	3.56058	0.000370031	0.0124154
Astrocytes	PDK4	281.98	-0.689425	0.193604	-3.561	0.000369441	0.0124154
Astrocytes	HILPDA	136.823	1.1719	0.329097	3.56096	0.000369506	0.0124154
Astrocytes	CABP4	2.43246	0.904355	0.253988	3.56062	0.000369978	0.0124154
Astrocytes	AC010680.4	3.24985	-0.658006	0.184827	-3.56012	0.000370687	0.0124177
Astrocytes	TRA2B	178.053	-0.261035	0.073364	-3.55808	0.000373573	0.0124744
Astrocytes	SLC5A12	9.63509	-0.770357	0.216506	-3.55812	0.000373514	0.0124744
Astrocytes	ARID3A	20.9603	0.54961	0.154486	3.55768	0.000374151	0.0124744
Astrocytes	PPP5C	108.147	-0.258483	0.0726787	-3.55652	0.000375796	0.0125096
Astrocytes	SCARA3	420.329	0.562619	0.158234	3.55561	0.000377108	0.0125335
Astrocytes	POU2F1	1073.77	-0.259264	0.0729873	-3.55218	0.000382053	0.012621
Astrocytes	PARP9	102.638	0.450128	0.126718	3.55219	0.000382043	0.012621
Astrocytes	SLC10A6	10.7788	-0.561088	0.157958	-3.55213	0.000382128	0.012621
Astrocytes	AC008875.3	3.4578	-0.858615	0.241641	-3.55327	0.000380467	0.012621
Astrocytes	EMP3	17.8878	0.672105	0.18931	3.55029	0.000384807	0.0126896
Astrocytes	ZBTB43	161.74	-0.274756	0.0774138	-3.54918	0.000386431	0.0127025
Astrocytes	YAF2	307.222	-0.248376	0.069975	-3.5495	0.000385965	0.0127025
Astrocytes	SGSH	14.4805	-0.395901	0.111559	-3.54879	0.000387	0.0127025
Astrocytes	LINC00334	2.14196	-1.36233	0.384186	-3.54602	0.000391095	0.012817
Astrocytes	TENM4	995.496	0.47153	0.133045	3.54413	0.000393914	0.0128894
Astrocytes	EDNRA	9.52813	0.604824	0.170735	3.54248	0.000396391	0.0129339
Astrocytes	AL390755.1	149.245	1.09969	0.310436	3.5424	0.000396499	0.0129339
Astrocytes	METAP1D	67.9832	-0.359848	0.101625	-3.54095	0.000398684	0.0129543
Astrocytes	SLAIN2	186.107	-0.280893	0.0793311	-3.54077	0.000398961	0.0129543
Astrocytes	CD44	713.168	1.05871	0.29895	3.54141	0.000397991	0.0129543
Astrocytes	ETFBKMT	15.977	-0.39762	0.11233	-3.53976	0.000400492	0.0129841
Astrocytes	HCN1	62.6774	0.772263	0.218235	3.53868	0.000402134	0.0130173
Astrocytes	TRUB2	15.7594	0.373416	0.105555	3.53765	0.000403701	0.0130258
Astrocytes	AL359317.1	22.9618	1.16171	0.32836	3.53791	0.000403303	0.0130258
Astrocytes	ERGIC3	48.7307	-0.2759	0.0779973	-3.5373	0.000404245	0.0130258
Astrocytes	PLCH2	5.95973	0.761816	0.215413	3.53654	0.00040541	0.0130435
Astrocytes	MOV10	96.7459	-0.325674	0.0921313	-3.53488	0.000407954	0.0131054
Astrocytes	GYG2	143.994	0.705245	0.199533	3.53447	0.000408598	0.0131062
Astrocytes	TBCEL	86.5181	-0.366494	0.103736	-3.53295	0.00041095	0.0131616
Astrocytes	DNAH12	69.0417	-0.433406	0.122715	-3.53181	0.00041272	0.0131784
Astrocytes	PIRT	35.5906	1.07034	0.303027	3.53217	0.000412171	0.0131784
Astrocytes	AL589787.2	2.2911	-0.87562	0.248144	-3.52867	0.000417652	0.0132579
Astrocytes	CHST9	112.343	0.708978	0.200922	3.52863	0.00041772	0.0132579
Astrocytes	RIT2	13.1843	0.579751	0.164283	3.52899	0.000417151	0.0132579
Astrocytes	A4GALT	12.561	0.943725	0.267424	3.52894	0.000417221	0.0132579
Astrocytes	AC074286.1	44.8712	-0.660329	0.187163	-3.5281	0.00041856	0.0132646
Astrocytes	SOX21	29.4251	-0.594352	0.168494	-3.52744	0.000419595	0.0132776
Astrocytes	TPP1	109.506	-0.43403	0.12311	-3.52556	0.000422585	0.0133522
Astrocytes	KANK2	48.4991	0.481495	0.136596	3.52497	0.000423533	0.0133622
Astrocytes	EXOC7	101.734	-0.237564	0.0674388	-3.52265	0.000427248	0.0134593
Astrocytes	TM2D1	180.616	-0.230148	0.0653631	-3.52107	0.00042981	0.0135198
Astrocytes	SLC1A5	1.17686	1.28169	0.364124	3.51992	0.000431681	0.0135585
Astrocytes	HMGN2	61.0716	-0.398736	0.113366	-3.51724	0.000436055	0.0135749
Astrocytes	LRRC4C	1519.73	-0.50411	0.143314	-3.51751	0.000435619	0.0135749
Astrocytes	CLSTN3	29.049	0.483213	0.137374	3.5175	0.000435639	0.0135749
Astrocytes	ANO6	374.741	0.466346	0.132516	3.51917	0.000432894	0.0135749
Astrocytes	APMAP	55.4106	-0.396823	0.112782	-3.51849	0.000434006	0.0135749
Astrocytes	LINC00158	38.8473	-0.483519	0.137461	-3.51751	0.000435615	0.0135749
Astrocytes	NOVA2	41.9263	0.334571	0.0951851	3.51495	0.000439829	0.0136722
Astrocytes	TAB2-AS1	4.41982	1.16468	0.331448	3.51391	0.00044157	0.0137062
Astrocytes	SERPING1	67.5483	0.894364	0.254597	3.51286	0.000443309	0.0137199
Astrocytes	ENDOD1	126.935	0.327186	0.0931355	3.51301	0.000443057	0.0137199
Astrocytes	AC069228.1	38.3633	0.601046	0.17122	3.51037	0.000447489	0.0137286
Astrocytes	HSPH1	368.91	-1.18797	0.338346	-3.5111	0.000446264	0.0137286
Astrocytes	SLC47A2	5.73168	0.972814	0.277032	3.51156	0.000445483	0.0137286
Astrocytes	ZNF878	1.48512	1.25162	0.356546	3.51041	0.000447411	0.0137286
Astrocytes	IFNGR2	89.1612	0.472898	0.134687	3.5111	0.000446261	0.0137286
Astrocytes	MAGED1	304.61	-0.325508	0.0926974	-3.51151	0.000445561	0.0137286
Astrocytes	AL355377.3	8.44201	-0.58307	0.166165	-3.50899	0.00044981	0.0137798
Astrocytes	PSMD4	54.6261	0.276349	0.0787895	3.50744	0.000452448	0.0138406
Astrocytes	AL353807.5	5.64142	1.00808	0.287489	3.50649	0.000454058	0.0138498
Astrocytes	FUT9	2570.99	-0.339063	0.0966927	-3.5066	0.000453866	0.0138498
Astrocytes	EFNA5	1133.13	-0.373977	0.106723	-3.50418	0.000458008	0.01393
Astrocytes	BCAS3	1182.74	-0.244077	0.0696485	-3.50441	0.000457626	0.01393
Astrocytes	NME7	247.347	-0.262415	0.0749106	-3.50304	0.000459984	0.01397
Astrocytes	AC016931.1	11.6846	-0.707497	0.202041	-3.50175	0.000462218	0.0139977
Astrocytes	ETV5	82.0877	-0.593204	0.169402	-3.50175	0.000462207	0.0139977
Astrocytes	AL121845.1	3.85722	-0.771032	0.220238	-3.50091	0.000463674	0.0140217
Astrocytes	PPP1R7	65.5681	0.257696	0.0736343	3.49968	0.000465818	0.0140664
Astrocytes	ERICH3	12.3946	0.690572	0.197535	3.49594	0.000472394	0.0142243
Astrocytes	HDX	67.2312	-0.382754	0.109476	-3.49624	0.000471867	0.0142243
Astrocytes	AC024257.3	51.5695	-0.569621	0.162986	-3.49491	0.000474224	0.0142388
Astrocytes	SMAD6	49.1043	0.532912	0.152479	3.49499	0.000474088	0.0142388
Astrocytes	IGFBP7	900.594	0.481505	0.137806	3.49409	0.000475686	0.0142625
Astrocytes	AC020930.1	11.6355	-0.580546	0.166182	-3.49344	0.000476847	0.014277
Astrocytes	NKAIN3-IT1	46.1651	-0.425013	0.121701	-3.49226	0.000478946	0.0143196
Astrocytes	HNRNPAB	16.7629	0.434457	0.12443	3.49157	0.000480195	0.0143367
Astrocytes	CPE	2452.48	-0.366362	0.104973	-3.49006	0.00048291	0.0143367
Astrocytes	ACTR3B	93.7751	-0.290739	0.0832926	-3.49057	0.000481985	0.0143367
Astrocytes	C8orf34	103.307	1.20806	0.34608	3.49071	0.000481745	0.0143367
Astrocytes	TPD52	47.7874	0.428493	0.122779	3.48995	0.000483117	0.0143367
Astrocytes	NPEPL1	80.3451	-0.302073	0.0865617	-3.48969	0.000483586	0.0143367
Astrocytes	MYO5C	47.1772	0.877222	0.25141	3.4892	0.00048446	0.0143425
Astrocytes	SNIP1	21.6233	-0.32377	0.0928194	-3.48817	0.000486344	0.0143508
Astrocytes	GPATCH11	25.061	0.310619	0.0890554	3.48793	0.00048678	0.0143508
Astrocytes	SRSF3	100.588	-0.355894	0.102025	-3.48831	0.000486078	0.0143508
Astrocytes	WIF1	384.835	-0.781526	0.224107	-3.48728	0.000487951	0.0143653
Astrocytes	ZNF521	669.102	-0.312979	0.0897658	-3.48662	0.000489169	0.0143812
Astrocytes	C7	1.57065	1.13532	0.325789	3.48482	0.000492473	0.014429
Astrocytes	PAQR8	158.414	-0.426802	0.122473	-3.48485	0.000492406	0.014429
Astrocytes	FAM155A-IT1	8.71237	-0.540466	0.155117	-3.48425	0.000493525	0.014429
Astrocytes	ITGB3	2.44007	0.829413	0.238036	3.4844	0.000493239	0.014429
Astrocytes	NIPBL	754.935	-0.209322	0.060088	-3.48359	0.00049474	0.0144445
Astrocytes	DRAXIN	3.15611	0.933284	0.267956	3.48298	0.000495869	0.0144575
Astrocytes	FHL2	4.59622	0.703373	0.202066	3.4809	0.000499724	0.0144988
Astrocytes	NFKB1	204.581	-0.253954	0.0729479	-3.4813	0.000498984	0.0144988
Astrocytes	FBXW11	335.689	-0.241312	0.069335	-3.48037	0.000500715	0.0144988
Astrocytes	HMGN4	16.5475	-0.402138	0.115515	-3.48127	0.000499044	0.0144988
Astrocytes	IFNAR2	156.831	0.466804	0.134113	3.48067	0.000500153	0.0144988
Astrocytes	ZMYND8	443.25	-0.386889	0.111181	-3.47982	0.000501752	0.0145089
Astrocytes	TAF3	207.492	-0.281822	0.0809998	-3.47929	0.00050275	0.0145179
Astrocytes	XPO7	174.222	-0.253581	0.0728958	-3.47868	0.000503894	0.0145311
Astrocytes	PPARGC1A	401.914	-0.475831	0.13684	-3.47727	0.000506542	0.0145513
Astrocytes	RRS1-AS1	12.7728	-0.570266	0.164018	-3.47685	0.000507348	0.0145513
Astrocytes	PI4K2A	27.9246	-0.272104	0.0782585	-3.47699	0.000507075	0.0145513
Astrocytes	SLC1A2	16918.6	-0.485833	0.139694	-3.47783	0.000505491	0.0145513
Astrocytes	BRAF	701.665	-0.214245	0.0616595	-3.47465	0.000511514	0.0146509
Astrocytes	CRB1	1589.82	-0.315356	0.0907792	-3.47387	0.000513002	0.0146737
Astrocytes	PHIP	755.197	-0.266129	0.0766703	-3.47109	0.000518356	0.0148068
Astrocytes	FAM225B	1.9496	-1.17993	0.340383	-3.46648	0.000527326	0.015041
Astrocytes	OTOGL	29.805	-0.474214	0.136813	-3.46614	0.00052798	0.015041
Astrocytes	TFCP2	271.151	-0.241384	0.0697145	-3.46246	0.000535262	0.0152279
Astrocytes	FLOT1	97.6308	0.402252	0.116225	3.46098	0.000538215	0.0152914
Astrocytes	SHISA5	105.849	0.483898	0.139953	3.45757	0.000545064	0.0154238
Astrocytes	SLC6A13	8.19352	-0.708448	0.204891	-3.45768	0.000544843	0.0154238
Astrocytes	MAOB	617.952	0.556807	0.161024	3.45792	0.000544359	0.0154238
Astrocytes	LINC01239	55.8986	-0.541544	0.156655	-3.45693	0.000546376	0.0154327
Astrocytes	AC024597.1	6.45572	-0.663095	0.191829	-3.4567	0.000546841	0.0154327
Astrocytes	CTNNBIP1	104.501	-0.315473	0.0913849	-3.45214	0.000556163	0.0156749
Astrocytes	SOX5	7416.72	-0.341604	0.0989943	-3.45074	0.000559054	0.0157145
Astrocytes	MRTFA-AS1	2.48503	0.988048	0.286313	3.45093	0.000558652	0.0157145
Astrocytes	AC093117.1	1.91797	1.05834	0.306737	3.45032	0.000559915	0.0157178
Astrocytes	AL157911.1	122.197	-0.562826	0.163141	-3.44994	0.000560709	0.0157192
Astrocytes	TCEAL6	17.1416	0.927532	0.26897	3.44846	0.000563801	0.0157849
Astrocytes	MTSS2	661.559	-0.300114	0.0870476	-3.4477	0.000565386	0.0158084
Astrocytes	ZFAND5	386.048	-0.422004	0.122442	-3.44657	0.000567745	0.0158534
Astrocytes	LINC01605	7.53454	-0.626999	0.18194	-3.44619	0.000568542	0.0158547
Astrocytes	CWC25	41.5638	0.338145	0.098132	3.44582	0.000569321	0.0158555
Astrocytes	FSBP	16.1337	-0.465113	0.134996	-3.44539	0.000570245	0.0158603
Astrocytes	AC006043.1	7.16669	-0.521128	0.151296	-3.44442	0.00057229	0.0158963
Astrocytes	CASP10	6.12695	-0.565553	0.164276	-3.44269	0.000575958	0.0159772
Astrocytes	NCKAP5	1539.21	-0.436338	0.126761	-3.4422	0.000576994	0.0159849
Astrocytes	MLLT3	633.126	-0.364971	0.106104	-3.43974	0.000582274	0.016089
Astrocytes	AC002072.1	67.5408	-0.564296	0.164046	-3.43987	0.000581992	0.016089
Astrocytes	CDK14	623.93	-0.261444	0.0760335	-3.43853	0.000584871	0.0161397
Astrocytes	KIF17	3.64908	0.797738	0.23206	3.43763	0.000586827	0.0161725
Astrocytes	AL356356.1	5.80172	-0.772275	0.224819	-3.4351	0.000592344	0.016254
Astrocytes	AC079848.2	100.149	-0.416486	0.121247	-3.43501	0.000592532	0.016254
Astrocytes	FBXO30	57.2935	-0.340654	0.0991546	-3.43559	0.00059127	0.016254
Astrocytes	TMEM94	132.101	-0.243199	0.0708031	-3.43486	0.000592859	0.016254
Astrocytes	SLC1A4	259.502	-0.357011	0.103987	-3.43321	0.000596478	0.016332
Astrocytes	LMNB1	15.3079	0.957634	0.279035	3.43195	0.000599249	0.0163679
Astrocytes	C11orf80	79.3589	0.391704	0.114136	3.43191	0.000599337	0.0163679
Astrocytes	PLEKHA4	14.4758	0.652956	0.190312	3.43098	0.000601398	0.016403
Astrocytes	KIAA0825	275.269	-0.356289	0.103857	-3.43058	0.00060229	0.0164062
Astrocytes	STMN2	94.2559	0.970448	0.282922	3.43009	0.00060339	0.016415
Astrocytes	MDM4	264.69	-0.216452	0.063122	-3.42911	0.00060557	0.0164443
Astrocytes	LINC02009	2.51431	2.66979	0.778613	3.4289	0.000606023	0.0164443
Astrocytes	OAZ2	59.104	-0.207639	0.0605848	-3.42725	0.000609726	0.0165236
Astrocytes	CNTN1	3722.09	-0.412455	0.120385	-3.42613	0.000612245	0.0165706
Astrocytes	TTPA	165.997	-0.425096	0.124155	-3.4239	0.000617285	0.0166377
Astrocytes	SBF2	1116.1	-0.211126	0.0616672	-3.42363	0.000617899	0.0166377
Astrocytes	AP000802.1	2.63184	-0.682235	0.199255	-3.42393	0.000617231	0.0166377
Astrocytes	TXNL4B	82.1204	-0.46171	0.134873	-3.4233	0.000618658	0.0166377
Astrocytes	NEFH	36.1646	0.970697	0.283532	3.42359	0.000618005	0.0166377
Astrocytes	CBLB	270.368	-0.30536	0.0892286	-3.42222	0.000621117	0.0166614
Astrocytes	LRP11	70.145	0.246504	0.0720257	3.42245	0.000620598	0.0166614
Astrocytes	MAP7D2	25.5588	0.721105	0.210776	3.4212	0.000623465	0.0167032
Astrocytes	SLC39A14	181.856	0.89373	0.261319	3.42007	0.000626048	0.0167088
Astrocytes	AC137579.1	4.78914	-0.677966	0.198204	-3.42055	0.000624953	0.0167088
Astrocytes	AC105339.6	7.56453	-0.407915	0.119266	-3.4202	0.000625756	0.0167088
Astrocytes	FSTL4	52.4831	0.501712	0.146749	3.41885	0.000628864	0.0167628
Astrocytes	ARFIP1	221.695	-0.272632	0.0798094	-3.41603	0.000635401	0.0168945
Astrocytes	DNMT1	53.3945	0.265321	0.0776655	3.4162	0.00063502	0.0168945
Astrocytes	YTHDF1	125.171	0.690418	0.202135	3.41562	0.000636372	0.016899
Astrocytes	ANK2	5162.96	-0.300088	0.087887	-3.41447	0.000639056	0.016949
Astrocytes	ZRANB2-AS2	302.2	-0.459984	0.134768	-3.41316	0.000642147	0.0169884
Astrocytes	CDK5RAP1	86.5765	-0.289765	0.084895	-3.41322	0.000642012	0.0169884
Astrocytes	TMEM161B	149.087	-0.284119	0.0833104	-3.41036	0.000648761	0.0170985
Astrocytes	SEMA6A-AS2	6.36729	-0.549384	0.161124	-3.40969	0.000650356	0.0170985
Astrocytes	AL627171.1	6.01665	-0.608862	0.17853	-3.41042	0.000648637	0.0170985
Astrocytes	MYO1C	23.4237	0.409911	0.120219	3.40971	0.000650322	0.0170985
Astrocytes	AL109761.1	1.96009	1.24921	0.366322	3.41014	0.000649302	0.0170985
Astrocytes	SUCLG2-AS1	610.146	-0.357983	0.105046	-3.40787	0.000654711	0.0171278
Astrocytes	SHB	60.8613	0.560678	0.164485	3.40869	0.000652761	0.0171278
Astrocytes	COL27A1	181.16	0.564766	0.165699	3.40839	0.000653482	0.0171278
Astrocytes	RBM17	91.4298	-0.199245	0.0584622	-3.4081	0.00065417	0.0171278
Astrocytes	TSC22D3	50.0159	-0.575342	0.168845	-3.40752	0.000655572	0.0171291
Astrocytes	SLC25A39	30.4762	-0.381805	0.112087	-3.40635	0.000658388	0.0171815
Astrocytes	RUBCNL	87.8459	-0.484347	0.142274	-3.40432	0.000663283	0.0172879
Astrocytes	AC007389.5	1.59297	-0.898494	0.264146	-3.4015	0.000670161	0.0174242
Astrocytes	AC104024.4	4.3464	0.766868	0.22545	3.4015	0.00067016	0.0174242
Astrocytes	TENT5A	71.2654	-0.623659	0.183374	-3.40103	0.000671335	0.0174333
Astrocytes	ALG6	58.906	-0.38054	0.111944	-3.39938	0.000675387	0.0175091
Astrocytes	MFF	198.578	-0.309443	0.0910349	-3.39917	0.00067591	0.0175091
Astrocytes	TOX	1250.97	-0.373043	0.1098	-3.39747	0.000680124	0.0175967
Astrocytes	SNRK	189.676	-0.343249	0.101085	-3.39564	0.000684685	0.017693
Astrocytes	TSPAN5	511.067	-0.21018	0.0619313	-3.39377	0.000689384	0.017771
Astrocytes	AC021733.4	2.6388	0.837508	0.246773	3.39384	0.000689196	0.017771
Astrocytes	AC110614.1	12.9593	-0.675563	0.199118	-3.39278	0.00069186	0.0178131
Astrocytes	PTPRG-AS1	89.4011	-0.51024	0.150414	-3.39224	0.000693236	0.0178268
Astrocytes	HSPA4L	232.169	-0.874845	0.25807	-3.38996	0.000699039	0.0179542
Astrocytes	EMB	2.94524	0.805744	0.237735	3.38925	0.00070084	0.0179786
Astrocytes	EXOC6B	1036.2	-0.213598	0.0630506	-3.38772	0.000704764	0.0180573
Astrocytes	PML	76.0854	0.64551	0.190575	3.38717	0.000706168	0.0180706
Astrocytes	N6AMT1	18.0488	0.354135	0.104562	3.38685	0.000706992	0.0180706
Astrocytes	IKZF5	46.7133	-0.244461	0.0721883	-3.38644	0.000708065	0.0180762
Astrocytes	AC112253.1	4.45808	0.769894	0.227423	3.38529	0.000711029	0.0180863
Astrocytes	TEAD4	5.84575	1.20143	0.354883	3.38541	0.000710717	0.0180863
Astrocytes	TECR	139.346	-0.364329	0.107604	-3.38583	0.000709631	0.0180863
Astrocytes	ZFAND6	397.958	-0.242599	0.0716888	-3.38406	0.000714237	0.0181461
Astrocytes	MCU	142.507	-0.374071	0.110609	-3.38193	0.000719788	0.0182432
Astrocytes	CABIN1	200.419	0.345885	0.102272	3.38202	0.000719553	0.0182432
Astrocytes	AC097460.1	76.5955	-0.497349	0.14711	-3.38081	0.00072273	0.0182773
Astrocytes	SEMA7A	8.18896	0.629857	0.186306	3.38076	0.000722862	0.0182773
Astrocytes	KIAA0513	47.6142	0.299026	0.0884641	3.3802	0.000724337	0.0182928
Astrocytes	GZF1	18.0502	-0.341053	0.100921	-3.3794	0.000726434	0.0183238
Astrocytes	AC005410.2	16.7746	-0.362401	0.107288	-3.37784	0.000730572	0.0183992
Astrocytes	SH3BGRL	236.279	-0.24465	0.0724328	-3.37762	0.000731162	0.0183992
Astrocytes	AC006387.1	16.0402	-1.05337	0.311966	-3.37654	0.000734026	0.0184493
Astrocytes	CGRRF1	81.1667	-0.363099	0.107551	-3.37605	0.00073534	0.0184604
Astrocytes	SLC19A3	16.3729	0.554379	0.164262	3.37496	0.000738252	0.0185115
Astrocytes	SCN9A	3.72945	0.73032	0.216503	3.37326	0.000742836	0.0185436
Astrocytes	MOK	271.774	-0.238838	0.0707975	-3.37354	0.000742081	0.0185436
Astrocytes	PRRT2	172.682	0.323222	0.0958232	3.37311	0.00074324	0.0185436
Astrocytes	COX10-AS1	128.188	-0.370828	0.109945	-3.37286	0.00074392	0.0185436
Astrocytes	BRCC3	87.1219	-0.29688	0.0879945	-3.37384	0.000741264	0.0185436
Astrocytes	FOXP1	795.003	-0.390112	0.11579	-3.36913	0.000754069	0.0186887
Astrocytes	LINC00881	1.33123	1.1068	0.328516	3.36909	0.000754162	0.0186887
Astrocytes	FAM13B	267.119	-0.169952	0.0504277	-3.37021	0.000751114	0.0186887
Astrocytes	WAKMAR2	4.38485	-0.607052	0.180167	-3.36939	0.000753351	0.0186887
Astrocytes	DAZAP1	100.494	-0.216548	0.0642697	-3.36937	0.000753395	0.0186887
Astrocytes	NEK7	391.724	-0.316525	0.0940001	-3.36728	0.00075913	0.0187898
Astrocytes	AL109653.3	9.02137	-0.664168	0.197465	-3.36348	0.000769667	0.0190283
Astrocytes	ANGPTL2	7.75123	0.808145	0.240351	3.36236	0.000772791	0.0190768
Astrocytes	RNFT1	17.4411	-0.340017	0.101132	-3.36213	0.000773434	0.0190768
Astrocytes	NOTCH1	134.599	-0.325087	0.0967359	-3.36056	0.000777848	0.0191633
Astrocytes	AC097459.1	3.05394	-0.903953	0.269063	-3.35963	0.000780476	0.0192057
Astrocytes	KPNA3	236.543	-0.189825	0.0565182	-3.35866	0.000783215	0.0192507
Astrocytes	RFX3	1847.8	-0.269645	0.0802997	-3.35798	0.00078513	0.0192753
Astrocytes	NEURL1B	2.70952	0.836512	0.249167	3.35723	0.000787262	0.0192783
Astrocytes	PYGB	159.49	-0.297543	0.0886426	-3.35666	0.000788897	0.0192783
Astrocytes	NCAM2	3696.81	-0.299515	0.0892274	-3.35676	0.000788617	0.0192783
Astrocytes	MID1IP1	30.0302	-0.390422	0.116291	-3.3573	0.000787075	0.0192783
Astrocytes	GABRA2	1162.74	-0.363556	0.108335	-3.35585	0.000791228	0.0192906
Astrocytes	SRGN	5.89786	0.894877	0.266657	3.35592	0.000791029	0.0192906
Astrocytes	IGSF11	715.806	-0.30329	0.0903879	-3.35543	0.000792411	0.0192972
Astrocytes	SPATA5	213.343	-0.256976	0.0766026	-3.35466	0.000794613	0.0193121
Astrocytes	TMEM184C	70.5286	-0.240172	0.0716021	-3.35426	0.000795764	0.0193121
Astrocytes	STEAP4	3.94678	0.820411	0.244581	3.35435	0.000795506	0.0193121
Astrocytes	AL596087.2	3.25075	0.835056	0.249086	3.35248	0.000800919	0.0194149
Astrocytes	VASN	51.1204	0.664602	0.198264	3.3521	0.000802008	0.0194191
Astrocytes	TAB3	67.3563	-0.298544	0.0890792	-3.35145	0.000803903	0.0194427
Astrocytes	PON2	854.041	-0.292308	0.0872307	-3.35097	0.000805287	0.0194539
Astrocytes	SMO	74.519	-0.22605	0.0675065	-3.34857	0.000812296	0.0195562
Astrocytes	KLF12	834.537	-0.339113	0.101257	-3.34904	0.000810927	0.0195562
Astrocytes	MGME1	58.1262	-0.308323	0.092069	-3.34883	0.000811549	0.0195562
Astrocytes	MED23	91.2154	-0.22736	0.0679054	-3.34818	0.000813433	0.0195613
Astrocytes	PRDX6	217.252	-0.357829	0.10695	-3.34577	0.000820543	0.019668
Astrocytes	LINC01237	82.5531	-0.504523	0.150799	-3.34567	0.000820835	0.019668
Astrocytes	WDR17	522.073	-0.351323	0.104994	-3.34614	0.000819461	0.019668
Astrocytes	CCDC160	17.227	-0.370172	0.11065	-3.34542	0.000821593	0.019668
Astrocytes	AKT3	2147.62	-0.300096	0.0897453	-3.34387	0.000826194	0.0196735
Astrocytes	AC092162.2	6.45106	-0.73384	0.219465	-3.34377	0.000826477	0.0196735
Astrocytes	GAP43	62.3675	0.817009	0.244264	3.34478	0.000823485	0.0196735
Astrocytes	AC097375.4	6.47499	-0.82398	0.246383	-3.34431	0.000824879	0.0196735
Astrocytes	CDH13	30.6768	0.4448	0.132995	3.34449	0.000824341	0.0196735
Astrocytes	AZIN2	34.8689	-0.372026	0.111293	-3.34275	0.000829524	0.0197238
Astrocytes	SGIP1	1580.2	-0.256387	0.0767196	-3.34187	0.000832159	0.0197642
Astrocytes	FBXO33	99.4238	-0.250081	0.0749085	-3.33848	0.000842372	0.0199843
Astrocytes	ZNF580	26.0859	-0.31766	0.09519	-3.33712	0.000846521	0.0200603
Astrocytes	LTBP1	507.427	0.405126	0.121437	3.3361	0.00084964	0.0201116
Astrocytes	LINC02208	24.7654	-0.632491	0.189757	-3.33317	0.00085863	0.020279
Astrocytes	USP50	4.23752	-0.636116	0.19084	-3.33324	0.000858398	0.020279
Astrocytes	AC019080.6	2.73669	-0.650993	0.195362	-3.33224	0.00086151	0.0203243
Astrocytes	EPS15L1	383.464	-0.268771	0.080674	-3.33157	0.00086356	0.02035
Astrocytes	EIF3E	501.375	-0.304749	0.0914934	-3.33083	0.000865861	0.0203815
Astrocytes	ZFPM2	524.576	-0.415501	0.12476	-3.3304	0.000867215	0.0203907
Astrocytes	OSMR-AS1	424.319	0.597248	0.179443	3.32834	0.00087365	0.020519
Astrocytes	NECAB1	83.6344	0.613824	0.184458	3.32772	0.000875584	0.020519
Astrocytes	RORA	10534.9	-0.343899	0.103343	-3.32774	0.000875525	0.020519
Astrocytes	PCLO	284.1	-0.502725	0.151112	-3.32683	0.000878398	0.0205621
Astrocytes	DRC1	15.0144	0.824176	0.248001	3.32328	0.000889646	0.0207794
Astrocytes	AC078881.1	176.705	-0.3954	0.118968	-3.32358	0.000888692	0.0207794
Astrocytes	AL662884.5	2.25784	1.07147	0.3227	3.32031	0.00089917	0.0208836
Astrocytes	THSD7A	760.546	-0.247247	0.0744493	-3.32102	0.000896905	0.0208836
Astrocytes	TRMT9B	112.156	0.513314	0.154616	3.31993	0.000900393	0.0208836
Astrocytes	PVT1	106.169	0.501892	0.151112	3.32132	0.000895938	0.0208836
Astrocytes	AC009318.1	33.473	-0.502511	0.151371	-3.31974	0.000901022	0.0208836
Astrocytes	SHISA9	24.7028	0.761486	0.229332	3.32045	0.000898711	0.0208836
Astrocytes	MID1	469.548	-0.363535	0.109478	-3.32063	0.000898149	0.0208836
Astrocytes	TRIM36	7.99057	0.719231	0.216707	3.31891	0.000903682	0.0209193
Astrocytes	MPC1	190.776	-0.270636	0.0815502	-3.31865	0.000904544	0.0209193
Astrocytes	HMGB2	25.6254	-0.452118	0.13625	-3.3183	0.000905671	0.0209225
Astrocytes	BEGAIN	46.7383	-0.248172	0.0748021	-3.31772	0.000907567	0.0209434
Astrocytes	MBNL3	36.2479	-0.543018	0.163701	-3.31714	0.000909455	0.0209641
Astrocytes	LINC00472	1050.35	-0.40552	0.12227	-3.31661	0.000911183	0.020981
Astrocytes	FAM167A	113.93	-0.304067	0.0917444	-3.31429	0.000918776	0.0211329
Astrocytes	SHROOM2	100.638	-0.356577	0.10762	-3.31331	0.000922	0.0211839
Astrocytes	DCT	27.8366	-0.504203	0.152189	-3.313	0.000923009	0.0211841
Astrocytes	IFI16	75.2743	0.911427	0.275211	3.31174	0.000927164	0.0211877
Astrocytes	GPR137B	143.405	-0.239001	0.0721532	-3.31241	0.000924962	0.0211877
Astrocytes	VSTM2A	9.85145	0.850234	0.256733	3.31174	0.000927177	0.0211877
Astrocytes	KIF24	46.4947	-0.514458	0.15532	-3.31224	0.000925527	0.0211877
Astrocytes	TET2	284.815	-0.252951	0.07639	-3.31131	0.000928601	0.0211911
Astrocytes	PANX2	13.081	-0.51978	0.156981	-3.31109	0.000929328	0.0211911
Astrocytes	PCM1	796.974	-0.218726	0.0660754	-3.31024	0.000932149	0.0212096
Astrocytes	VPS37C	32.0764	0.299675	0.0905277	3.31031	0.000931912	0.0212096
Astrocytes	FAM3D-AS1	17.2261	0.597396	0.180544	3.30887	0.000936725	0.021268
Astrocytes	OSTF1	61.798	0.485116	0.146604	3.30903	0.000936214	0.021268
Astrocytes	TMCC1	700.486	-0.217822	0.065874	-3.30664	0.000944209	0.0214149
Astrocytes	COL5A1	9.78148	0.548814	0.166041	3.30529	0.000948786	0.0214956
Astrocytes	GCSIR	4.40063	0.636805	0.192791	3.30309	0.00095627	0.0215673
Astrocytes	GRAMD2B	1611.99	-0.331002	0.100187	-3.30384	0.000953699	0.0215673
Astrocytes	AP000465.1	2.82538	-0.764085	0.231313	-3.30325	0.000955714	0.0215673
Astrocytes	PABPC3	2.69906	-0.698196	0.2114	-3.30273	0.000957497	0.0215673
Astrocytes	TOB1	149.162	-0.48849	0.147883	-3.30322	0.000955828	0.0215673
Astrocytes	ARHGAP36	1.64949	-0.861517	0.260863	-3.30256	0.000958069	0.0215673
Astrocytes	TGFB3	22.6882	0.483342	0.146374	3.30211	0.000959597	0.0215787
Astrocytes	JRKL	25.5765	-0.320905	0.0972422	-3.30006	0.000966636	0.0217139
Astrocytes	C14orf132	83.697	-0.323031	0.097924	-3.2988	0.000971006	0.0217889
Astrocytes	LRRIQ3	13.4093	-0.705059	0.213828	-3.29731	0.00097615	0.0218625
Astrocytes	KIF5C	152.541	0.342956	0.104021	3.29699	0.000977266	0.0218625
Astrocytes	DCN	8.13922	0.950426	0.288274	3.29696	0.000977389	0.0218625
Astrocytes	PPIL4	122.539	-0.243159	0.0737919	-3.2952	0.000983531	0.0219766
Astrocytes	MKRN3	197.13	-0.327116	0.0993054	-3.29405	0.000987566	0.0220435
Astrocytes	PPP1R1A	12.4228	0.629928	0.191297	3.29293	0.000991478	0.0220842
Astrocytes	CASTOR1	28.5557	-0.483553	0.146841	-3.29304	0.000991089	0.0220842
Astrocytes	ZNF844	45.6463	-0.396323	0.120368	-3.29258	0.000992712	0.0220884
Astrocytes	SLC6A15	10.8234	0.613058	0.186298	3.29073	0.000999262	0.0222107
Astrocytes	HGF	242.55	0.733407	0.222916	3.29006	0.00100167	0.0222409
Astrocytes	CNNM2	343.485	-0.239158	0.072711	-3.28916	0.00100486	0.0222883
Astrocytes	PTPRE	168.729	0.412433	0.125461	3.28733	0.00101144	0.0224106
Astrocytes	AC023481.1	19.1234	-0.336107	0.102291	-3.28579	0.00101696	0.0224586
Astrocytes	LRAT	41.4922	0.751442	0.228711	3.28555	0.00101785	0.0224586
Astrocytes	AL157834.1	21.0079	-0.496539	0.151123	-3.28565	0.00101747	0.0224586
Astrocytes	CHD9	1423.64	-0.238988	0.0727344	-3.28577	0.00101705	0.0224586
Astrocytes	LINC02669	1.97667	0.907219	0.276152	3.28522	0.00101904	0.0224614
Astrocytes	SOBP	570.893	-0.228632	0.0696204	-3.28398	0.00102351	0.0225363
Astrocytes	GPC5-IT1	6.35803	-0.586463	0.178636	-3.28301	0.00102706	0.022591
Astrocytes	RBM26	712.273	-0.230481	0.0702128	-3.28261	0.0010285	0.0225991
Astrocytes	PLGLB1	13.2867	-0.442446	0.134836	-3.28135	0.0010331	0.0226296
Astrocytes	DENND4C	405.555	-0.205313	0.062565	-3.2816	0.0010322	0.0226296
Astrocytes	HEPACAM	550.173	-0.314212	0.0957404	-3.28191	0.00103106	0.0226296
Astrocytes	TTC30A	10.9881	-0.416794	0.127075	-3.27991	0.0010384	0.0226754
Astrocytes	PIK3CA	294.878	-0.312689	0.0953278	-3.28014	0.00103754	0.0226754
Astrocytes	C16orf89	60.437	-0.30831	0.0939838	-3.28046	0.00103639	0.0226754
Astrocytes	AC074008.1	1.58345	-0.864176	0.263578	-3.27863	0.00104311	0.0227291
Astrocytes	AC013731.1	2.3106	-0.689129	0.210223	-3.27809	0.00104512	0.0227291
Astrocytes	SEPSECS	46.2779	-0.324531	0.0989895	-3.27844	0.00104381	0.0227291
Astrocytes	ZNF273	93.6343	0.397278	0.1212	3.27785	0.00104599	0.0227291
Astrocytes	ABCG1	6.50642	0.689148	0.210248	3.27779	0.00104624	0.0227291
Astrocytes	EIF4EBP2	107.895	-0.301431	0.0919863	-3.27692	0.00104948	0.0227761
Astrocytes	AC004009.1	1.23517	1.1755	0.358792	3.27627	0.00105188	0.0228048
Astrocytes	AL606491.1	1.65906	0.903973	0.275995	3.27532	0.00105542	0.0228581
Astrocytes	STK33	950.42	-0.319632	0.0976118	-3.27452	0.00105841	0.0228993
Astrocytes	ANKRD33B	41.8115	-0.568983	0.173826	-3.2733	0.001063	0.0229094
Astrocytes	PPP1R26	18.1241	-0.323928	0.0989624	-3.27324	0.00106321	0.0229094
Astrocytes	RAB5B	55.6815	-0.206701	0.0631482	-3.27326	0.00106313	0.0229094
Astrocytes	GLIPR1	5.86398	0.72953	0.222836	3.27384	0.00106095	0.0229094
Astrocytes	UFD1	58.1864	0.286538	0.0875649	3.2723	0.00106677	0.0229628
Astrocytes	AC243772.2	1.39005	-1.15127	0.35209	-3.26981	0.00107619	0.0230948
Astrocytes	MYBPH	3.70633	1.52426	0.466149	3.26989	0.00107588	0.0230948
Astrocytes	NETO2	10.8049	0.541787	0.165675	3.27018	0.0010748	0.0230948
Astrocytes	KIF1B	1783.39	-0.227268	0.069523	-3.26897	0.0010794	0.0231404
Astrocytes	REV1	257.532	-0.189649	0.0580315	-3.26804	0.00108297	0.0231464
Astrocytes	RNF44	31.7106	-0.296045	0.0905811	-3.26829	0.00108199	0.0231464
Astrocytes	HLA-DRA	5.09637	1.17627	0.359901	3.26831	0.00108192	0.0231464
Astrocytes	CDC34	32.1401	-0.338661	0.103651	-3.26734	0.00108564	0.0231802
Astrocytes	GADD45A	67.0722	0.985418	0.301695	3.26627	0.00108974	0.0231931
Astrocytes	ARID1B	1507.34	-0.227435	0.069622	-3.26671	0.00108804	0.0231931
Astrocytes	ARMCX5-GPRASP2	134.93	-0.356065	0.109009	-3.26638	0.00108931	0.0231931
Astrocytes	SLITRK4	15.0255	0.778998	0.238515	3.26604	0.00109064	0.0231931
Astrocytes	C8orf34-AS1	5.40197	1.38795	0.425128	3.26477	0.00109554	0.0232505
Astrocytes	CPNE3	103.457	-0.268374	0.0822016	-3.26483	0.00109528	0.0232505
Astrocytes	CBFA2T2	590.916	-0.179346	0.0549659	-3.26285	0.00110297	0.0233847
Astrocytes	CDO1	18.3274	-0.375012	0.114947	-3.26248	0.00110441	0.0233918
Astrocytes	CCNB3	8.04973	-0.549974	0.168614	-3.26175	0.00110728	0.0234292
Astrocytes	AL133372.3	3.50292	-0.810619	0.248604	-3.26068	0.00111146	0.023494
Astrocytes	AL450992.2	5.35552	0.742204	0.227964	3.2558	0.00113073	0.0235973
Astrocytes	CREG2	48.3133	0.788072	0.242055	3.25576	0.00113091	0.0235973
Astrocytes	LINC01091	13.1973	-0.595583	0.182963	-3.25521	0.00113309	0.0235973
Astrocytes	CHSY3	51.8396	0.512898	0.157427	3.25801	0.00112195	0.0235973
Astrocytes	PPP1R3G	8.29135	-0.704846	0.216353	-3.25786	0.00112257	0.0235973
Astrocytes	TCF19	2.90157	0.793437	0.24361	3.257	0.00112596	0.0235973
Astrocytes	AHCYL2	2782.75	-0.328877	0.100951	-3.25778	0.00112288	0.0235973
Astrocytes	KLHDC10	199.158	-0.204445	0.062775	-3.25679	0.00112678	0.0235973
Astrocytes	AC073111.4	9.68185	-0.353134	0.108462	-3.25583	0.00113061	0.0235973
Astrocytes	POLR3D	16.123	0.366816	0.112678	3.25543	0.00113221	0.0235973
Astrocytes	AL354920.1	2.68383	-0.618837	0.190081	-3.25564	0.00113136	0.0235973
Astrocytes	ATRNL1	111.691	0.5563	0.170853	3.25601	0.00112989	0.0235973
Astrocytes	AC009163.1	23.9023	0.8468	0.259941	3.25766	0.00112336	0.0235973
Astrocytes	SPATA33	16.3924	0.315788	0.0969373	3.25765	0.0011234	0.0235973
Astrocytes	PROCA1	13.3046	0.39963	0.122703	3.25689	0.00112642	0.0235973
Astrocytes	DTX3L	22.6377	0.50448	0.154997	3.25478	0.00113479	0.0236095
Astrocytes	HNRNPA0	35.8348	-0.286924	0.0882282	-3.25207	0.00114567	0.023789
Astrocytes	DCX	4.24397	0.627346	0.192903	3.25213	0.00114542	0.023789
Astrocytes	ATAD2B	417.313	-0.199233	0.0612947	-3.2504	0.00115241	0.0239054
Astrocytes	SP4	113.439	-0.317917	0.0978396	-3.24937	0.00115662	0.0239458
Astrocytes	GRIN2B	38.881	0.555397	0.170914	3.24956	0.00115583	0.0239458
Astrocytes	PPM1L	561.852	-0.239839	0.0738222	-3.24888	0.00115861	0.0239634
Astrocytes	HSD11B1-AS1	20.413	-0.462251	0.142302	-3.24838	0.00116065	0.0239821
Astrocytes	GPR155	149.188	0.402449	0.123928	3.24746	0.00116442	0.0240366
Astrocytes	OSER1	43.1203	-0.293584	0.0904348	-3.24636	0.00116891	0.0241058
Astrocytes	NANOG	5.85963	-0.581172	0.179075	-3.24541	0.00117282	0.0241627
Astrocytes	PKN2	489.408	-0.207844	0.064051	-3.24498	0.00117461	0.0241667
Astrocytes	CIB2	8.7332	0.533016	0.164277	3.24461	0.00117611	0.0241667
Astrocytes	AC005725.1	1.89432	-0.990788	0.305372	-3.24453	0.00117644	0.0241667
Astrocytes	ABCA3	146.263	0.40356	0.124396	3.24416	0.00117798	0.0241749
Astrocytes	THAP8	12.6697	0.402154	0.124002	3.24314	0.0011822	0.0242379
Astrocytes	PHF12	107.573	-0.193363	0.0596427	-3.24203	0.00118682	0.024309
Astrocytes	LINC02362	14.9911	-0.601142	0.185449	-3.24155	0.00118882	0.0243264
Astrocytes	DNAJC2	59.8438	0.240172	0.0741028	3.24106	0.00119084	0.0243443
Astrocytes	ANKRD31	29.624	-0.438146	0.135273	-3.23899	0.00119953	0.024451
Astrocytes	ACER2	13.3636	-0.800933	0.247266	-3.23915	0.00119886	0.024451
Astrocytes	APBA2	334.2	0.310728	0.0959241	3.23931	0.00119821	0.024451
Astrocytes	NEU3	28.5914	-0.310903	0.0960536	-3.23676	0.00120893	0.0246189
Astrocytes	THAP9-AS1	34.8203	-0.466077	0.14402	-3.23618	0.00121139	0.0246453
Astrocytes	C10orf90	151.349	-0.466102	0.144072	-3.23521	0.00121555	0.024706
Astrocytes	RAB8B	101.15	-0.227693	0.0703917	-3.23466	0.00121789	0.024706
Astrocytes	SHMT1	34.4639	0.357718	0.110586	3.23473	0.00121756	0.024706
Astrocytes	AC018541.1	9.10669	-0.760013	0.235001	-3.23408	0.00122036	0.0247325
Astrocytes	MPPED2	464.335	-0.324884	0.100516	-3.23215	0.00122863	0.0248507
Astrocytes	INSYN1	15.61	-0.448195	0.138678	-3.23192	0.00122963	0.0248507
Astrocytes	VSX1	22.9661	-0.425305	0.131596	-3.2319	0.00122972	0.0248507
Astrocytes	SPHKAP	6.45867	0.639354	0.197927	3.23026	0.00123679	0.0249222
Astrocytes	MANEA-DT	8.58586	-0.411998	0.127539	-3.23037	0.0012363	0.0249222
Astrocytes	TSHZ1	211.841	-0.49978	0.154714	-3.23035	0.0012364	0.0249222
Astrocytes	ZDHHC9	32.8696	0.548612	0.169872	3.22955	0.00123983	0.0249596
Astrocytes	BARD1	180.077	0.594964	0.184324	3.22781	0.00124742	0.0250885
Astrocytes	ST8SIA1	371.006	0.566684	0.175613	3.2269	0.00125141	0.0251448
Astrocytes	GPER1	5.31125	0.627053	0.194388	3.22577	0.00125633	0.0251558
Astrocytes	DOCK5	457.433	-0.382684	0.11862	-3.22614	0.00125473	0.0251558
Astrocytes	KIF5A	43.6131	0.464282	0.143933	3.22568	0.00125672	0.0251558
Astrocytes	SLITRK2	112.625	-0.393724	0.122035	-3.22631	0.00125397	0.0251558
Astrocytes	ST6GALNAC2	9.2701	0.881854	0.273441	3.22502	0.00125964	0.0251665
Astrocytes	IQCN	2.93312	-0.738689	0.229046	-3.22506	0.00125945	0.0251665
Astrocytes	ABLIM1	4046.95	-0.215963	0.0669913	-3.22375	0.00126526	0.0252549
Astrocytes	PTK2	1445.62	-0.210087	0.0651769	-3.22334	0.00126705	0.0252669
Astrocytes	USP30	60.3722	-0.208103	0.0645732	-3.22275	0.00126967	0.0252952
Astrocytes	LCA5	96.224	-0.329744	0.102349	-3.22176	0.00127404	0.0253346
Astrocytes	TMC7	19.0601	0.300575	0.0932951	3.22177	0.00127403	0.0253346
Astrocytes	GLIPR2	31.2615	0.679147	0.210886	3.22045	0.0012799	0.0254272
Astrocytes	AL121894.3	12.5282	-0.669664	0.207987	-3.21974	0.00128307	0.0254662
Astrocytes	TFCP2L1	53.3385	-0.695826	0.216206	-3.21835	0.00128933	0.0255664
Astrocytes	QARS	33.6721	-0.331207	0.102924	-3.21798	0.00129096	0.0255748
Astrocytes	COL24A1	13.0654	0.677687	0.210616	3.21764	0.00129251	0.0255816
Astrocytes	ITPKC	145.015	0.864703	0.268774	3.21721	0.00129445	0.0255959
Astrocytes	RAB4A	197.815	-0.264277	0.0821707	-3.2162	0.00129901	0.025646
Astrocytes	SLC4A10	55.4063	0.522466	0.162466	3.21584	0.00130062	0.025646
Astrocytes	PDE4D	2176.6	-0.487876	0.151699	-3.21608	0.00129952	0.025646
Astrocytes	CD163	1.40009	1.47221	0.457868	3.21535	0.00130284	0.0256659
Astrocytes	TRIM56	68.7047	0.303548	0.0944315	3.21448	0.00130681	0.02572
Astrocytes	UBAP2L	108.441	-0.189197	0.0588692	-3.21385	0.00130967	0.0257524
Astrocytes	LINC01750	7.97909	0.809157	0.251871	3.21258	0.00131547	0.0257945
Astrocytes	UBE2E3	410.986	-0.310531	0.0966571	-3.21271	0.00131488	0.0257945
Astrocytes	GPR158	69.8622	0.618813	0.19259	3.21311	0.00131304	0.0257945
Astrocytes	PSORS1C1	10.3768	0.985462	0.306882	3.21121	0.00132178	0.0258701
Astrocytes	DNAJB1	136.031	-0.926714	0.288585	-3.21123	0.00132167	0.0258701
Astrocytes	TLL1	3.76207	0.912913	0.284412	3.20983	0.00132815	0.025899
Astrocytes	GABRG2	40.6498	0.717352	0.22346	3.21021	0.00132639	0.025899
Astrocytes	UBE2Q2	83.2223	-0.323969	0.100909	-3.21051	0.00132498	0.025899
Astrocytes	PER1	127.743	-0.383174	0.119367	-3.21006	0.00132708	0.025899
Astrocytes	FGF13	16.3914	0.462748	0.144186	3.20939	0.00133019	0.0259148
Astrocytes	MVP	80.9638	0.443327	0.13817	3.20856	0.00133403	0.0259657
Astrocytes	ARHGEF17	172.054	0.322959	0.100667	3.20818	0.00133577	0.0259756
Astrocytes	KLHL32	591.456	-0.3791	0.118228	-3.20653	0.00134348	0.0261015
Astrocytes	NAV2	2729.13	0.296398	0.092454	3.2059	0.00134642	0.0261346
Astrocytes	LINC02060	159.717	-0.46298	0.14449	-3.20423	0.00135426	0.0262627
Astrocytes	PBX1	1377.79	-0.356935	0.111422	-3.20345	0.0013579	0.0263092
Astrocytes	ECRG4	3.09229	0.770688	0.240621	3.20291	0.00136048	0.0263349
Astrocytes	PLK3	10.3312	0.837586	0.261655	3.20111	0.001369	0.0264756
Astrocytes	ARID5A	24.944	0.803949	0.251241	3.19991	0.00137468	0.0265487
Astrocytes	ATG4B	130.533	0.247357	0.0773042	3.19979	0.00137529	0.0265487
Astrocytes	CASP9	50.9851	-0.22582	0.0705796	-3.19951	0.00137659	0.0265497
Astrocytes	ZC2HC1C	24.1709	0.45442	0.142127	3.19728	0.00138728	0.0267314
Astrocytes	RABL3	65.1753	-0.256872	0.0803766	-3.19586	0.00139415	0.0267662
Astrocytes	IRF1	18.5327	0.862554	0.269889	3.19596	0.00139365	0.0267662
Astrocytes	USP43	5.1445	0.497467	0.155636	3.19635	0.00139176	0.0267662
Astrocytes	ZNF711	28.2795	-0.369485	0.11559	-3.1965	0.00139104	0.0267662
Astrocytes	CD99	158.447	0.514721	0.161082	3.1954	0.00139637	0.0267845
Astrocytes	ANKAR	284.598	-0.254596	0.0796962	-3.19458	0.00140034	0.0268119
Astrocytes	LINC01378	8.94832	0.68953	0.215829	3.1948	0.00139927	0.0268119
Astrocytes	AL589787.1	5.99123	0.737421	0.230855	3.19431	0.00140167	0.026813
Astrocytes	FAM216A	24.7449	0.31861	0.099776	3.19325	0.00140682	0.0268873
Astrocytes	ASTN1	767.459	-0.288371	0.0903209	-3.19273	0.00140933	0.0269109
Astrocytes	FAM117B	80.3736	-0.299267	0.0938064	-3.19027	0.00142142	0.0271174
Astrocytes	PELI2	448.319	-0.350405	0.109845	-3.19	0.00142272	0.0271176
Astrocytes	NUDT3	187.669	0.309324	0.096975	3.18973	0.00142406	0.0271188
Astrocytes	HIST2H2BE	11.1594	-0.591306	0.1854	-3.18935	0.00142592	0.0271297
Astrocytes	AP000446.1	98.6089	-0.287192	0.0900544	-3.18909	0.0014272	0.0271297
Astrocytes	ZC2HC1B	5.39798	-0.678851	0.212908	-3.18847	0.00143028	0.0271638
Astrocytes	ARHGEF9	207.974	-0.253998	0.079694	-3.18716	0.00143677	0.0272625
Astrocytes	MED6	84.5665	-0.29098	0.0913129	-3.18663	0.00143941	0.0272881
Astrocytes	UNC80	180.917	-0.408369	0.128168	-3.18619	0.0014416	0.0273051
Astrocytes	CCN2	3.38247	0.920387	0.288892	3.18592	0.00144296	0.0273064
Astrocytes	B3GALT1	26.2124	-0.342483	0.107557	-3.1842	0.00145156	0.0274446
Astrocytes	AC092650.1	30.9228	-0.488275	0.153416	-3.1827	0.00145911	0.0275437
Astrocytes	NFIL3	30.0793	0.925896	0.290945	3.18238	0.00146071	0.0275437
Astrocytes	ADRB1	45.577	-0.361754	0.113669	-3.18251	0.00146005	0.0275437
Astrocytes	RFLNA	114.165	-0.322148	0.101247	-3.18181	0.00146357	0.027573
Astrocytes	LRRFIP2	431.062	-0.209354	0.0658147	-3.18097	0.00146784	0.0275798
Astrocytes	BAALC-AS1	521.915	0.807714	0.253908	3.18112	0.00146705	0.0275798
Astrocytes	IPO7	118.493	0.221936	0.0697656	3.18116	0.00146686	0.0275798
Astrocytes	VTA1	104.286	-0.260678	0.0819636	-3.18041	0.00147067	0.0276084
Astrocytes	ACSL3	617.786	-0.288135	0.0906215	-3.17954	0.00147508	0.0276421
Astrocytes	PRDM15	30.3734	0.303472	0.0954386	3.17975	0.001474	0.0276421
Astrocytes	ATXN10	551.722	-0.217234	0.0683432	-3.17857	0.00148002	0.0277101
Astrocytes	CAVIN1	7.00821	0.738822	0.232499	3.17774	0.00148428	0.0277652
Astrocytes	ZDHHC13	83.2253	-0.294584	0.0927832	-3.17497	0.00149851	0.0280067
Astrocytes	AP006621.4	5.22348	0.803199	0.2531	3.17345	0.0015064	0.0281044
Astrocytes	HLF	93.9484	-0.399568	0.125904	-3.17359	0.00150567	0.0281044
Astrocytes	CLCC1	48.0153	-0.249484	0.0786527	-3.17197	0.00151411	0.0282234
Astrocytes	RAB11FIP5	23.3085	0.327641	0.103306	3.17157	0.00151616	0.0282366
Astrocytes	FAM155A	3889.28	-0.312155	0.0984444	-3.17087	0.00151982	0.0282799
Astrocytes	AL158068.2	5.87815	0.828061	0.26121	3.17009	0.0015239	0.028329
Astrocytes	RAB30	213.577	-0.281093	0.0886768	-3.16986	0.00152514	0.028329
Astrocytes	UBXN2B	110.535	-0.225402	0.0711191	-3.16936	0.00152777	0.0283529
Astrocytes	SF1	253.028	-0.266426	0.0840783	-3.16878	0.00153081	0.0283844
Astrocytes	FAF1	1014.44	-0.176753	0.055825	-3.16621	0.00154442	0.0285117
Astrocytes	PSMD1	387.431	-0.2137	0.0674825	-3.16674	0.00154157	0.0285117
Astrocytes	MTAP	265.072	-0.33894	0.107016	-3.16721	0.00153912	0.0285117
Astrocytes	MEIS2	2213.59	-0.25076	0.0791899	-3.16657	0.00154251	0.0285117
Astrocytes	YWHAH	116.022	0.659868	0.208396	3.16641	0.00154333	0.0285117
Astrocytes	TMCO4	50.6663	0.336387	0.106295	3.16465	0.00155269	0.0286145
Astrocytes	MIR4713HG	16.6065	-0.636724	0.20119	-3.16479	0.00155196	0.0286145
Astrocytes	ACADL	16.8429	-0.573335	0.181189	-3.16429	0.00155463	0.0286157
Astrocytes	COQ8B	91.4934	0.325397	0.102839	3.16413	0.00155546	0.0286157
Astrocytes	AC125613.1	364.447	-0.522902	0.165315	-3.16306	0.00156118	0.0286959
Astrocytes	PAN3	465.702	-0.217718	0.0688412	-3.16262	0.00156357	0.0287148
Astrocytes	NMNAT2	23.0127	0.486041	0.153699	3.16229	0.00156534	0.0287151
Astrocytes	CFAP54	192.585	0.47923	0.151566	3.16186	0.00156766	0.0287151
Astrocytes	FECH	44.8793	-0.247885	0.0783941	-3.16203	0.00156672	0.0287151
Astrocytes	AC024075.3	3.0941	0.75558	0.23926	3.15799	0.00158862	0.0290737
Astrocytes	AL158840.1	83.6493	-0.568956	0.180183	-3.15766	0.0015904	0.0290811
Astrocytes	FMO2	4.74262	0.824635	0.261362	3.15515	0.00160416	0.0293075
Astrocytes	TMEM108	630.01	-0.402623	0.127634	-3.15452	0.00160762	0.0293453
Astrocytes	C1D	98.5886	-0.244262	0.077487	-3.1523	0.00161992	0.0294809
Astrocytes	LINC02506	31.0432	1.41702	0.449574	3.15192	0.00162202	0.0294809
Astrocytes	ATP10D	177.788	-0.268608	0.0852012	-3.15263	0.00161806	0.0294809
Astrocytes	SLC2A12	100.73	-0.455242	0.144426	-3.15207	0.00162117	0.0294809
Astrocytes	AC004918.1	17.9795	-0.389201	0.123446	-3.15281	0.00161707	0.0294809
Astrocytes	AL139220.2	17.6079	0.595532	0.189088	3.14949	0.00163554	0.029525
Astrocytes	FAM110C	12.1682	0.845071	0.268268	3.15011	0.00163211	0.029525
Astrocytes	C6	2.3791	0.947822	0.300931	3.14963	0.00163476	0.029525
Astrocytes	RNF182	358.3	-0.397991	0.126317	-3.15073	0.00162865	0.029525
Astrocytes	OPRM1	7.38587	0.616336	0.195656	3.1501	0.00163213	0.029525
Astrocytes	BORCS5	168.885	-0.219433	0.0696385	-3.15103	0.00162694	0.029525
Astrocytes	TMED8	224.241	-0.25499	0.0809298	-3.15076	0.00162845	0.029525
Astrocytes	LINC01727	399.214	-0.690643	0.219288	-3.14948	0.00163562	0.029525
Astrocytes	TSACC	3.09075	0.710975	0.225809	3.14857	0.00164071	0.0295473
Astrocytes	LMOD1	98.5087	0.906485	0.287909	3.14851	0.00164105	0.0295473
Astrocytes	GPR12	2.82795	0.865932	0.274988	3.14899	0.00163838	0.0295473
Astrocytes	APBB3	40.3462	-0.338313	0.107482	-3.14762	0.00164604	0.029612
Astrocytes	PHC2	115.17	0.326941	0.103884	3.14718	0.00164853	0.02962
Astrocytes	B3GALT2	8.56346	0.697171	0.221532	3.14705	0.00164929	0.02962
Astrocytes	PCNX2	254.95	-0.373628	0.118762	-3.14603	0.00165504	0.0296746
Astrocytes	CH25H	3.77431	1.60652	0.510653	3.14601	0.00165514	0.0296746
Astrocytes	LINC01414	190.145	-0.624033	0.198386	-3.14555	0.00165777	0.0296965
Astrocytes	RAP1GDS1	450.255	-0.312914	0.099511	-3.14451	0.00166363	0.0297763
Astrocytes	GABRG1	486.158	-0.446527	0.142097	-3.1424	0.00167567	0.0299418
Astrocytes	CHCHD3	425.29	-0.243261	0.0774125	-3.1424	0.00167571	0.0299418
Astrocytes	LRSAM1	142.929	0.270881	0.086222	3.14167	0.00167989	0.0299912
Astrocytes	RAP2C-AS1	136.902	-0.424103	0.135024	-3.14094	0.00168408	0.0300405
Astrocytes	USP24	411.372	-0.254865	0.0811601	-3.14028	0.00168786	0.0300421
Astrocytes	SLC25A29	248.69	0.278457	0.0886816	3.13996	0.00168968	0.0300421
Astrocytes	AC006504.5	83.084	-0.453084	0.144297	-3.13994	0.00168985	0.0300421
Astrocytes	HSCB	89.7034	0.310334	0.0988268	3.14018	0.00168844	0.0300421
Astrocytes	AL355836.2	1.90895	1.4551	0.463797	3.13735	0.0017048	0.03026
Astrocytes	MFGE8	106.818	-0.418113	0.133271	-3.13733	0.00170497	0.03026
Astrocytes	TMCC2	64.9719	0.626222	0.199691	3.13595	0.00171296	0.0303508
Astrocytes	AC027117.1	73.3657	-0.403995	0.128821	-3.13611	0.00171207	0.0303508
Astrocytes	RNF135	26.7273	-0.243531	0.0776699	-3.13546	0.00171587	0.0303549
Astrocytes	AC003035.1	5.54425	-0.718816	0.229256	-3.13542	0.00171606	0.0303549
Astrocytes	C12orf60	76.8819	-0.34215	0.109147	-3.13476	0.00171995	0.0303983
Astrocytes	AL359915.1	7.6787	-0.504637	0.160995	-3.13448	0.00172159	0.0304018
Astrocytes	MRO	103.551	-0.402505	0.128447	-3.13363	0.00172656	0.0304642
Astrocytes	METTL25	200.347	-0.283189	0.0904007	-3.1326	0.00173266	0.0305463
Astrocytes	NBPF15	30.4612	0.475166	0.151721	3.13184	0.00173712	0.0305994
Astrocytes	EYS	27.6001	0.658536	0.2103	3.13141	0.00173971	0.0306194
Astrocytes	PCBD2	144.418	-0.265622	0.084851	-3.13045	0.0017454	0.0306941
Astrocytes	CHIT1	3.30683	0.901491	0.288055	3.12958	0.00175057	0.0307397
Astrocytes	BAZ2B	2058.37	-0.253086	0.0808705	-3.12952	0.0017509	0.0307397
Astrocytes	SMPDL3A	13.3347	-0.364119	0.116402	-3.12812	0.00175931	0.0308361
Astrocytes	METTL2B	111.597	0.565013	0.180622	3.12816	0.00175906	0.0308361
Astrocytes	ZMIZ1-AS1	22.778	-0.478913	0.153139	-3.12731	0.00176416	0.0308955
Astrocytes	AP000813.1	2.48208	1.11978	0.358228	3.1259	0.00177263	0.0310181
Astrocytes	AC008124.1	61.9807	-0.298522	0.0955382	-3.12464	0.00178026	0.0311258
Astrocytes	PCMT1	96.2339	0.2321	0.074299	3.12386	0.00178495	0.0311821
Astrocytes	SCAP	99.1517	-0.150791	0.0482884	-3.12273	0.00179184	0.0312301
Astrocytes	KCNQ5	90.5233	0.468335	0.149979	3.12268	0.00179213	0.0312301
Astrocytes	OR1L8	1.7162	-0.990459	0.31718	-3.1227	0.00179201	0.0312301
Astrocytes	AC083843.3	34.3789	-0.412573	0.132139	-3.12226	0.00179471	0.0312492
Astrocytes	GPATCH2	190.065	-0.301224	0.0964888	-3.12186	0.00179715	0.031266
Astrocytes	GXYLT1	63.8187	-0.244341	0.0782909	-3.12094	0.00180276	0.0313378
Astrocytes	AL589935.1	176.998	-0.482574	0.154654	-3.12035	0.00180636	0.0313746
Astrocytes	CPED1	70.4714	-0.715167	0.229318	-3.11867	0.00181669	0.031528
Astrocytes	SPATA1	61.9044	-0.520676	0.167061	-3.11668	0.00182901	0.0316639
Astrocytes	C4orf36	13.3929	-0.423206	0.135779	-3.11687	0.00182782	0.0316639
Astrocytes	AC105285.1	190.066	-0.413718	0.132723	-3.11715	0.00182611	0.0316639
Astrocytes	AC016405.3	1.44129	-0.92098	0.295546	-3.11619	0.00183202	0.0316901
Astrocytes	INA	24.3779	0.822919	0.264102	3.11591	0.00183379	0.0316948
Astrocytes	AL451070.1	5.11975	0.701448	0.225277	3.11371	0.00184751	0.031809
Astrocytes	RPS8	76.8786	0.437012	0.140338	3.11399	0.00184579	0.031809
Astrocytes	TTC27	104.008	-0.287936	0.092461	-3.11414	0.00184482	0.031809
Astrocytes	MYH15	38.9588	-0.560983	0.180136	-3.11422	0.00184433	0.031809
Astrocytes	AL391422.4	3.65857	0.889109	0.285574	3.1134	0.00184943	0.031809
Astrocytes	CSGALNACT1	1960.61	-0.261657	0.084037	-3.11359	0.00184828	0.031809
Astrocytes	DSE	341.295	-0.260287	0.0836709	-3.11084	0.00186558	0.0319928
Astrocytes	RNLS	163.745	-0.371231	0.119323	-3.11115	0.00186362	0.0319928
Astrocytes	SPTBN2	13.6653	0.385473	0.123917	3.11074	0.00186617	0.0319928
Astrocytes	AL133325.2	4.65106	-0.58342	0.187521	-3.11122	0.00186314	0.0319928
Astrocytes	IRS2	512.863	0.464817	0.149445	3.11028	0.00186907	0.0320165
Astrocytes	AC099792.1	684.062	-0.297961	0.0958428	-3.10885	0.00187819	0.0320984
Astrocytes	WDR54	3.2415	0.930669	0.299411	3.10834	0.00188144	0.0320984
Astrocytes	PODXL	11.7567	0.721559	0.232118	3.10859	0.00187985	0.0320984
Astrocytes	SLC37A3	74.9521	0.253381	0.0815035	3.10883	0.00187829	0.0320984
Astrocytes	UBAP2	334.43	-0.194913	0.0627024	-3.10855	0.0018801	0.0320984
Astrocytes	HES5	27.9617	-1.04959	0.337786	-3.10727	0.00188821	0.0321879
Astrocytes	SYTL2	56.8968	0.314052	0.101101	3.10634	0.00189422	0.0322643
Astrocytes	ATG3	42.0627	-0.238219	0.076717	-3.10517	0.00190171	0.0323138
Astrocytes	PRSS27	3.29627	0.583785	0.18799	3.1054	0.00190023	0.0323138
Astrocytes	AC105101.2	1.27957	0.922268	0.296977	3.10552	0.00189945	0.0323138
Astrocytes	GPRC5C	36.6465	-0.306017	0.0985886	-3.10397	0.0019094	0.0323923
Astrocytes	KCNK15-AS1	10.6712	0.548847	0.176818	3.10402	0.00190913	0.0323923
Astrocytes	GPBP1L1	302.551	-0.206108	0.0664129	-3.10343	0.00191291	0.032426
Astrocytes	NPNT	60.8673	0.729832	0.235223	3.10273	0.00191747	0.0324353
Astrocytes	MOXD1	194.112	-0.487571	0.157154	-3.1025	0.00191894	0.0324353
Astrocytes	SNX10	43.4088	0.546958	0.176296	3.10249	0.00191901	0.0324353
Astrocytes	CHRDL1	128.366	-0.40039	0.129058	-3.1024	0.0019196	0.0324353
Astrocytes	LINC00463	4.81032	-0.544012	0.17538	-3.10191	0.00192274	0.0324624
Astrocytes	SPRED2	439.031	-0.279155	0.0900053	-3.10154	0.00192518	0.0324776
Astrocytes	AC008760.2	1.33325	1.54075	0.496857	3.10099	0.00192877	0.0325123
Astrocytes	IL17D	159.931	-0.345131	0.11134	-3.0998	0.00193649	0.0326164
Astrocytes	LINC00354	2.7842	-0.724649	0.233822	-3.09915	0.00194078	0.0326366
Astrocytes	PLXNB2	83.6829	-0.257947	0.0832256	-3.09937	0.00193933	0.0326366
Astrocytes	BGN	32.0647	0.628231	0.202803	3.09773	0.00195007	0.0327667
Astrocytes	ODC1	13.3174	-0.482777	0.1559	-3.09672	0.00195676	0.032801
Astrocytes	CHFR	145.857	0.180242	0.0581971	3.09709	0.00195431	0.032801
Astrocytes	ALDH1A2	13.6903	0.595196	0.192194	3.09685	0.00195592	0.032801
Astrocytes	MYORG	81.9072	-0.384775	0.124264	-3.09644	0.0019586	0.0328059
Astrocytes	LINC02231	14.0634	-0.751294	0.242678	-3.09585	0.00196253	0.0328456
Astrocytes	EPN1	34.7221	-0.239691	0.0774429	-3.09507	0.00196767	0.0329055
Astrocytes	EXOSC7	57.6516	0.323529	0.104553	3.09439	0.00197215	0.0329315
Astrocytes	NCOA3	149.819	-0.187197	0.0604961	-3.09437	0.00197234	0.0329315
Astrocytes	PIM1	17.8111	0.686324	0.221839	3.09379	0.00197615	0.0329431
Astrocytes	CLCN5	73.2949	-0.244779	0.079119	-3.09381	0.00197607	0.0329431
Astrocytes	COPE	91.4592	-0.245512	0.0793847	-3.09269	0.0019835	0.0330396
Astrocytes	AP000915.2	6.62752	0.869057	0.281087	3.09177	0.00198967	0.0331163
Astrocytes	AC002451.1	94.2981	-0.344345	0.111389	-3.09137	0.00199235	0.0331347
Astrocytes	RBMS3	2705.12	-0.298546	0.0966137	-3.09009	0.00200093	0.0332513
Astrocytes	FAM161A	36.2239	-0.298039	0.0964767	-3.08924	0.0020067	0.0332906
Astrocytes	STAG1	499.229	-0.205046	0.0663784	-3.08904	0.00200802	0.0332906
Astrocytes	ADD3-AS1	331.535	-0.341898	0.110666	-3.08947	0.00200517	0.0332906
Astrocytes	FOXN2	213.97	-0.28552	0.0924558	-3.08818	0.00201384	0.033361
Astrocytes	MAL2	10.5355	0.749541	0.242888	3.08595	0.00202906	0.0335866
Astrocytes	ASS1	22.787	0.604882	0.196056	3.08525	0.00203382	0.0335866
Astrocytes	ZFYVE21	164.36	-0.372458	0.120719	-3.08533	0.00203324	0.0335866
Astrocytes	RAB37	7.49902	0.435933	0.141285	3.0855	0.00203211	0.0335866
Astrocytes	AC007406.5	19.7941	-0.354795	0.115016	-3.08474	0.00203727	0.0336173
Astrocytes	PTPRG	1355.9	-0.261197	0.084684	-3.08437	0.0020398	0.0336329
Astrocytes	AC104232.3	24.0738	-0.515947	0.167342	-3.08318	0.00204801	0.0337419
Astrocytes	ARHGAP31	596.855	-0.285963	0.0927599	-3.08283	0.00205045	0.0337558
Astrocytes	REST	98.6424	-0.240287	0.0779571	-3.08229	0.00205413	0.0337901
Astrocytes	TRIM9	1517.85	-0.276972	0.0898713	-3.08187	0.00205702	0.0338101
Astrocytes	ALDH6A1	111.507	-0.20648	0.067003	-3.08165	0.00205855	0.0338101
Astrocytes	ANP32E	57.5683	-0.240252	0.0780697	-3.07741	0.00208807	0.0342672
Astrocytes	CCDC9	12.9426	0.455572	0.148048	3.07719	0.00208962	0.0342672
Astrocytes	AL008730.1	10.203	-0.594964	0.193407	-3.07624	0.00209632	0.0342993
Astrocytes	EMP2	34.5207	0.463249	0.150591	3.07622	0.00209644	0.0342993
Astrocytes	LAMA5	59.6058	0.359271	0.116786	3.07631	0.00209581	0.0342993
Astrocytes	HIBCH	825.178	-0.376259	0.12235	-3.07527	0.00210311	0.034313
Astrocytes	PEX5L	267.759	-0.293574	0.0954676	-3.07512	0.00210421	0.034313
Astrocytes	DPYSL2	1669.44	0.293053	0.0953072	3.07482	0.00210627	0.034313
Astrocytes	PPP1R3C	207.497	-0.542578	0.176464	-3.07472	0.00210702	0.034313
Astrocytes	AC018618.1	28.7604	0.737729	0.239896	3.0752	0.00210359	0.034313
Astrocytes	SLC7A6	65.5441	0.34166	0.111079	3.07581	0.0020993	0.034313
Astrocytes	SLC3A2	234.789	-0.304416	0.0990253	-3.07413	0.0021112	0.0343184
Astrocytes	ETV6	607.354	0.501331	0.163124	3.0733	0.00211703	0.0343184
Astrocytes	NUDT21	101.502	-0.208452	0.0678046	-3.0743	0.00210997	0.0343184
Astrocytes	DLGAP1-AS4	7.23193	0.498804	0.162303	3.07329	0.0021171	0.0343184
Astrocytes	CBARP	30.3126	-0.454245	0.147799	-3.0734	0.00211634	0.0343184
Astrocytes	ZNF823	20.1636	-0.315313	0.10259	-3.07353	0.00211544	0.0343184
Astrocytes	CINP	35.8105	-0.183885	0.0598386	-3.07301	0.0021191	0.0343245
Astrocytes	RYR2	73.1059	0.444496	0.144711	3.07161	0.00212909	0.0344337
Astrocytes	MTMR10	326.244	-0.2873	0.0935335	-3.07163	0.00212895	0.0344337
Astrocytes	SCN4B	5.44385	0.838317	0.272948	3.07134	0.00213097	0.0344377
Astrocytes	ZNF469	10.2396	0.51768	0.168574	3.07093	0.00213391	0.0344588
Astrocytes	CLASP2	1193.13	-0.260573	0.0848739	-3.07012	0.00213974	0.0345266
Astrocytes	MERTK	847.244	-0.414419	0.134996	-3.06985	0.00214164	0.0345309
Astrocytes	SV2B	36.0567	0.565123	0.184125	3.06924	0.00214604	0.0345755
Astrocytes	CDKAL1	681.554	-0.189595	0.0617798	-3.06888	0.00214862	0.0345907
Astrocytes	NSMCE2	633.817	-0.18901	0.0615969	-3.06849	0.00215141	0.0346092
Astrocytes	CHST7	63.1567	-0.403558	0.131529	-3.06821	0.00215345	0.0346156
Astrocytes	CADPS	467.734	0.536119	0.174798	3.06708	0.0021616	0.0347203
Astrocytes	TAX1BP3	19.9324	-0.307747	0.100354	-3.06662	0.00216497	0.0347481
Astrocytes	VIP	2.75288	1.22073	0.398194	3.06566	0.00217193	0.0347621
Astrocytes	AL355474.1	2.91037	0.735575	0.239964	3.06536	0.00217407	0.0347621
Astrocytes	STN1	49.7434	0.373113	0.121715	3.06546	0.00217335	0.0347621
Astrocytes	LDHA	58.0493	0.4705	0.153461	3.06592	0.00217005	0.0347621
Astrocytes	GOLGA6L9	25.5769	-0.360377	0.117545	-3.06586	0.00217046	0.0347621
Astrocytes	STX18	240.592	-0.20417	0.066631	-3.06419	0.00218261	0.0348722
Astrocytes	TEAD3	45.0628	0.502437	0.164019	3.06328	0.00218923	0.0349252
Astrocytes	ADIPOR2	151.163	-0.258302	0.0843215	-3.0633	0.00218912	0.0349252
Astrocytes	PPFIBP1	25.4111	0.416995	0.136255	3.06041	0.00221032	0.0352103
Astrocytes	LRRK1	8.16709	0.484111	0.158186	3.0604	0.00221043	0.0352103
Astrocytes	CRPPA	210.097	-0.346336	0.113177	-3.06012	0.00221246	0.0352161
Astrocytes	ZNF24	111.8	-0.289403	0.0946397	-3.05794	0.00222863	0.0354467
Astrocytes	AC010976.1	15.9031	0.576964	0.188763	3.05656	0.00223896	0.0355843
Astrocytes	CECR2	559.673	-0.32826	0.107497	-3.05366	0.00226071	0.035903
Astrocytes	MTX2	254.922	-0.242346	0.0793752	-3.05317	0.00226439	0.0359344
Astrocytes	AC072022.1	8.46438	0.840129	0.275269	3.05203	0.002273	0.0360272
Astrocytes	AC016042.1	3.55019	0.746009	0.244437	3.05194	0.00227365	0.0360272
Astrocytes	SMIM19	33.94	0.308471	0.101108	3.05092	0.00228142	0.0361234
Astrocytes	PHLDB2	4.82995	0.915725	0.300191	3.05047	0.0022848	0.0361498
Astrocytes	TARID	18.6654	-0.544423	0.178603	-3.04822	0.00230198	0.0363943
Astrocytes	DIPK1B	28.3377	-0.372511	0.122235	-3.04751	0.00230745	0.0364263
Astrocytes	AL355974.1	1.71385	1.26102	0.413771	3.04763	0.00230657	0.0364263
Astrocytes	EPS15	764.588	-0.224597	0.073714	-3.04687	0.00231239	0.036477
Astrocytes	CASD1	248.287	-0.221047	0.0725594	-3.04643	0.00231575	0.0365028
Astrocytes	Z83843.1	87.2125	-0.290509	0.0953681	-3.04619	0.0023176	0.0365048
Astrocytes	KRT222	8.95991	0.75512	0.247923	3.04578	0.00232078	0.0365276
Astrocytes	FAM49A	282.006	-0.280431	0.0921204	-3.04418	0.00233318	0.0365699
Astrocytes	AC092567.1	16.9574	-0.506935	0.166521	-3.04427	0.00233242	0.0365699
Astrocytes	SNX4	141.266	-0.203042	0.0667198	-3.0432	0.00234076	0.0365699
Astrocytes	KLKB1	130.94	-0.478479	0.157188	-3.044	0.00233454	0.0365699
Astrocytes	FARS2	490.005	-0.248123	0.081488	-3.0449	0.00232758	0.0365699
Astrocytes	PAPLN	458.305	-0.32437	0.106583	-3.04335	0.00233962	0.0365699
Astrocytes	ETV4	11.4148	-0.504503	0.165744	-3.04387	0.00233556	0.0365699
Astrocytes	AL121894.2	6.56639	-0.731841	0.240458	-3.04352	0.00233825	0.0365699
Astrocytes	ACSS1	717.159	-0.323994	0.106464	-3.04322	0.00234058	0.0365699
Astrocytes	RPRD1B	111.671	-0.224535	0.0737555	-3.04431	0.00233212	0.0365699
Astrocytes	NRSN2	58.992	0.288437	0.0947898	3.04291	0.00234304	0.0365784
Astrocytes	PLPP3	1278.47	-0.265992	0.0874312	-3.0423	0.00234776	0.0366251
Astrocytes	PI4KA	341.532	0.175704	0.057763	3.04181	0.00235158	0.0366306
Astrocytes	Z83745.1	7.84518	-0.436621	0.143537	-3.04187	0.00235113	0.0366306
Astrocytes	ZFYVE9	276.583	-0.152396	0.0501069	-3.04141	0.00235469	0.0366385
Astrocytes	NNMT	8.79204	-0.62206	0.204537	-3.0413	0.00235556	0.0366385
Astrocytes	DNAH7	1204.22	-0.519629	0.170967	-3.03935	0.00237089	0.0368228
Astrocytes	SLC17A6	6.10093	0.789084	0.259606	3.03955	0.00236932	0.0368228
Astrocytes	RYBP	185.85	-0.358728	0.118049	-3.03881	0.00237515	0.0368619
Astrocytes	OBI1-AS1	3629.94	-0.365057	0.120157	-3.03817	0.0023802	0.0369132
Astrocytes	ZNF660	26.5455	-0.295081	0.0971411	-3.03765	0.00238428	0.0369222
Astrocytes	ZMAT1	582.98	-0.330655	0.108851	-3.03769	0.00238403	0.0369222
Astrocytes	AF117829.1	866.897	-0.271628	0.08946	-3.03631	0.00239495	0.0370604
Astrocytes	NAPA-AS1	9.28137	0.408296	0.1345	3.03566	0.0024001	0.0371129
Astrocytes	COG6	171.55	-0.275781	0.090878	-3.03463	0.00240833	0.0372129
Astrocytes	CCND3	315.332	-0.466775	0.15385	-3.03395	0.00241371	0.0372144
Astrocytes	CYREN	82.3445	-0.332748	0.109668	-3.03414	0.00241226	0.0372144
Astrocytes	PIGN	276.729	-0.249949	0.0823787	-3.03414	0.0024122	0.0372144
Astrocytes	SYS1	12.9301	0.340041	0.112099	3.03339	0.00241821	0.0372566
Astrocytes	PPP1R21	160.734	-0.176381	0.0581584	-3.03277	0.00242323	0.0373068
Astrocytes	DCP1B	154.988	-0.280739	0.0925788	-3.03244	0.00242589	0.0373205
Astrocytes	EPHA5-AS1	4.03492	1.02346	0.337807	3.02971	0.00244788	0.0375768
Astrocytes	SYT1	399.843	0.594958	0.196371	3.02977	0.00244739	0.0375768
Astrocytes	MORC2-AS1	4.65119	-0.570105	0.188156	-3.02995	0.00244591	0.0375768
Astrocytes	POU6F2	398.834	-0.574264	0.189593	-3.02893	0.00245424	0.0376206
Astrocytes	MUS81	38.8617	0.382222	0.126191	3.02892	0.00245429	0.0376206
Astrocytes	MCC	817.477	-0.323722	0.106892	-3.02851	0.00245764	0.0376447
Astrocytes	AC072028.1	6.53942	-0.540071	0.178356	-3.02805	0.00246136	0.0376743
Astrocytes	TRIM33	313.276	-0.188064	0.062115	-3.02768	0.0024644	0.0376935
Astrocytes	AC020916.1	22.746	0.727141	0.240217	3.02702	0.0024698	0.03773
Astrocytes	GP6	12.6784	-0.448325	0.148111	-3.02695	0.00247035	0.03773
Astrocytes	AC004522.3	9.7493	-0.56314	0.186095	-3.0261	0.00247734	0.0378094
Astrocytes	ARRDC3	64.9927	-0.700429	0.231549	-3.02498	0.00248653	0.0379223
Astrocytes	CPSF4	42.1702	0.365025	0.12071	3.02399	0.00249464	0.0380185
Astrocytes	NUMA1	171.348	-0.202658	0.0670281	-3.02347	0.00249891	0.0380561
Astrocytes	AC093157.1	127.928	-0.392343	0.129776	-3.02322	0.00250096	0.0380598
Astrocytes	METTL14-DT	17.5034	0.340231	0.112547	3.02301	0.00250275	0.0380598
Astrocytes	RELCH	307.953	-0.210102	0.0695175	-3.02229	0.00250871	0.038123
Astrocytes	TAS2R31	3.19012	-0.566522	0.187474	-3.02187	0.00251215	0.0381478
Astrocytes	ALKBH1	64.7008	-0.210243	0.0695866	-3.02131	0.00251682	0.0381914
Astrocytes	P3H2	102.46	0.553261	0.18317	3.02048	0.00252375	0.038269
Astrocytes	AC245884.8	2.33958	-0.596344	0.197481	-3.01975	0.00252983	0.0383338
Astrocytes	GAB3	9.66468	0.947748	0.313894	3.01932	0.00253341	0.0383604
Astrocytes	TRIM2	793.391	-0.220007	0.0728811	-3.01871	0.00253854	0.0384107
Astrocytes	ERICH1	62.9626	-0.291106	0.0964768	-3.01736	0.00254983	0.0385539
Astrocytes	GLRA3	7.22605	0.6403	0.21238	3.01488	0.00257084	0.0388438
Astrocytes	AC005999.2	18.0673	-0.484825	0.160844	-3.01426	0.00257608	0.0388952
Astrocytes	UPRT	76.5124	-0.261308	0.0867007	-3.01391	0.00257903	0.0389119
Astrocytes	GSTA4	75.0472	-0.279264	0.092678	-3.01327	0.00258445	0.038938
Astrocytes	SYAP1	60.4733	-0.28114	0.0933004	-3.01328	0.00258442	0.038938
Astrocytes	PLB1	9.21555	0.605832	0.20116	3.0117	0.00259793	0.0390022
Astrocytes	ATP6V1A	212.997	-0.234375	0.0778203	-3.01174	0.00259752	0.0390022
Astrocytes	GALK2	168.041	-0.233963	0.0776777	-3.01197	0.00259554	0.0390022
Astrocytes	PARD6G-AS1	63.7679	-0.921582	0.305975	-3.01196	0.00259571	0.0390022
Astrocytes	HELZ2	6.40811	0.731352	0.2428	3.01217	0.00259392	0.0390022
Astrocytes	AC007652.3	3.83293	0.607548	0.201793	3.01076	0.00260596	0.0390673
Astrocytes	RIDA	120.429	-0.322317	0.10705	-3.01089	0.00260485	0.0390673
Astrocytes	TNS1	259.366	0.365859	0.121532	3.01038	0.00260921	0.0390877
Astrocytes	FAM122A	8.70173	-0.420111	0.139595	-3.00949	0.00261685	0.0390877
Astrocytes	SEMA4D	167.224	-0.315681	0.104885	-3.00978	0.00261439	0.0390877
Astrocytes	GRID1	949.1	-0.250115	0.0831137	-3.00931	0.00261842	0.0390877
Astrocytes	RAPGEF3	292.338	-0.315299	0.104764	-3.00961	0.00261586	0.0390877
Astrocytes	AC008056.1	51.652	-0.648547	0.215486	-3.00969	0.00261514	0.0390877
Astrocytes	AL133284.1	4.14464	0.741492	0.246474	3.0084	0.00262628	0.0391773
Astrocytes	AC104850.2	12.1832	-0.514783	0.171183	-3.0072	0.00263663	0.039304
Astrocytes	NREP	102.199	-0.323053	0.107443	-3.00673	0.00264074	0.0393375
Astrocytes	CFAP74	5.35719	0.538372	0.179172	3.00477	0.0026578	0.0394804
Astrocytes	CRTC2	15.2588	-0.337898	0.112433	-3.00533	0.00265297	0.0394804
Astrocytes	DNM1	97.9346	0.424053	0.141119	3.00492	0.00265648	0.0394804
Astrocytes	RABL2B	47.6909	0.237159	0.078923	3.00494	0.00265633	0.0394804
Astrocytes	AC009899.1	31.7153	-0.649473	0.216239	-3.0035	0.00266892	0.0396177
Astrocytes	KHDC4	85.5078	-0.226464	0.0754214	-3.00265	0.00267638	0.0396931
Astrocytes	SCN2A	68.6582	0.54674	0.182095	3.0025	0.00267776	0.0396931
Astrocytes	CBWD2	46.9106	-0.254322	0.0847393	-3.00123	0.00268895	0.0398311
Astrocytes	PTBP2	560.875	-0.208921	0.0696275	-3.00056	0.00269487	0.0398909
Astrocytes	FAM151A	17.2061	0.59083	0.196967	2.99964	0.00270295	0.0399719
Astrocytes	MCUB	25.3289	0.681063	0.227074	2.9993	0.00270602	0.0399719
Astrocytes	CHAC1	3.2557	-1.83261	0.611	-2.99937	0.00270542	0.0399719
Astrocytes	AK5	57.4161	0.454557	0.151609	2.99821	0.00271568	0.0400464
Astrocytes	INTS6-AS1	59.8538	-0.33187	0.110683	-2.99839	0.00271407	0.0400464
Astrocytes	AC100793.2	12.5119	0.424118	0.141463	2.99809	0.00271675	0.0400464
Astrocytes	SASH1	2094.45	-0.282087	0.0941636	-2.99572	0.00273802	0.0403318
Astrocytes	SH3TC1	10.4837	-0.557354	0.186114	-2.99469	0.00274728	0.040412
Astrocytes	SMARCD3	110.077	0.278121	0.0928703	2.99472	0.00274693	0.040412
Astrocytes	COL9A1	6.70995	-0.527441	0.17614	-2.99445	0.00274942	0.0404153
Astrocytes	AC091978.1	44.5683	-0.265159	0.0885654	-2.99393	0.00275405	0.0404553
Astrocytes	LINC02389	25.8903	-0.552674	0.184699	-2.9923	0.00276888	0.0406449
Astrocytes	SLC7A2	499.618	0.411693	0.13761	2.99173	0.00277397	0.0406913
Astrocytes	HDAC8	580.92	-0.203459	0.0680144	-2.99141	0.00277693	0.0407064
Astrocytes	AC124854.1	59.0532	-0.634485	0.212178	-2.99034	0.00278663	0.0408204
Astrocytes	XRCC3	10.4584	-0.409951	0.137173	-2.98858	0.00280275	0.0409996
Astrocytes	PSMC4	21.2517	0.30459	0.101917	2.98862	0.00280244	0.0409996
Astrocytes	BMP1	25.4088	0.360369	0.120621	2.9876	0.00281174	0.0411028
Astrocytes	MEOX2	8.12595	-0.729004	0.244211	-2.98514	0.00283448	0.0414065
Astrocytes	PLEKHG4B	18.0568	-1.49547	0.501286	-2.98327	0.00285189	0.0416321
Astrocytes	RNF2	36.1092	-0.289221	0.097001	-2.98162	0.00286723	0.0418054
Astrocytes	LINC02328	225.821	-0.408004	0.136842	-2.98157	0.00286772	0.0418054
Astrocytes	MYT1L	41.4546	0.5011	0.168263	2.97809	0.00290055	0.0419566
Astrocytes	COMMD1	364.276	-0.179325	0.0601815	-2.97974	0.00288496	0.0419566
Astrocytes	FGFR3	642.858	-0.398419	0.133824	-2.97718	0.00290915	0.0419566
Astrocytes	AC002460.2	1161.52	-0.33566	0.112695	-2.97849	0.00289675	0.0419566
Astrocytes	C4orf47	49.9969	0.432181	0.145058	2.97938	0.00288835	0.0419566
Astrocytes	SV2C	11.0478	0.640912	0.215106	2.97951	0.00288711	0.0419566
Astrocytes	PHYKPL	175.919	0.205263	0.0689216	2.97821	0.00289933	0.0419566
Astrocytes	GIGYF1	87.8645	-0.214646	0.0720989	-2.9771	0.00290985	0.0419566
Astrocytes	KMT2E	523.005	-0.197598	0.0663383	-2.97864	0.00289533	0.0419566
Astrocytes	AL450263.1	2.31522	0.844208	0.283479	2.97802	0.00290113	0.0419566
Astrocytes	MDM2	179.322	-0.32787	0.110033	-2.97976	0.00288477	0.0419566
Astrocytes	SDSL	9.67097	-0.550718	0.184903	-2.97841	0.00289749	0.0419566
Astrocytes	ABCC4	158.452	0.455343	0.152933	2.9774	0.00290705	0.0419566
Astrocytes	AP4S1	107.468	-0.219379	0.0736802	-2.97745	0.00290662	0.0419566
Astrocytes	ITGA11	2.10798	0.687443	0.230821	2.97825	0.00289896	0.0419566
Astrocytes	FAM3A	30.0721	-0.243765	0.0818732	-2.97735	0.00290752	0.0419566
Astrocytes	DUSP22	58.1053	0.411221	0.138167	2.97626	0.00291786	0.0420434
Astrocytes	TNRC6B	1316.95	-0.191574	0.064396	-2.97494	0.00293043	0.0421959
Astrocytes	AL136366.1	181.587	-0.324464	0.109076	-2.97467	0.00293302	0.0422043
Astrocytes	ADIPOR1	25.2972	-0.243415	0.0818389	-2.97433	0.00293633	0.0422217
Astrocytes	GABRA1	57.711	0.690322	0.232109	2.97413	0.00293822	0.0422217
Astrocytes	C1orf195	4.09399	-0.547152	0.183984	-2.97391	0.00294027	0.0422224
Astrocytes	ENC1	68.2844	0.752667	0.253163	2.97305	0.00294857	0.0422841
Astrocytes	OFD1	191.49	-0.23415	0.0787548	-2.97315	0.00294759	0.0422841
Astrocytes	RBKS	50.9689	-0.291731	0.0981335	-2.9728	0.00295099	0.0422903
Astrocytes	GRAMD2A	32.8506	0.58581	0.197093	2.97225	0.00295623	0.0423365
Astrocytes	ST6GALNAC3	507.508	-0.441361	0.148565	-2.97083	0.00296998	0.0424472
Astrocytes	PHYHIPL	884.302	-0.294666	0.0991764	-2.97113	0.00296704	0.0424472
Astrocytes	RAB27B	9.93056	0.624123	0.210079	2.97089	0.00296934	0.0424472
Astrocytes	SNRK-AS1	1.48731	-0.787945	0.265307	-2.96994	0.00297858	0.042515
Astrocytes	EPM2A	354.099	-0.338152	0.113859	-2.96991	0.00297888	0.042515
Astrocytes	ACADVL	170.687	-0.289949	0.0976352	-2.96972	0.00298076	0.042515
Astrocytes	MFSD14B	73.6849	-0.226383	0.076238	-2.96942	0.00298361	0.042527
Astrocytes	PDE1C	111.377	0.664961	0.223975	2.96891	0.00298861	0.0425696
Astrocytes	ZCWPW2	182.077	-0.288155	0.0970746	-2.96839	0.00299367	0.042613
Astrocytes	FAM66C	199.064	-0.297189	0.100145	-2.9676	0.00300133	0.0426932
Astrocytes	AC006511.6	1.89093	0.740255	0.249548	2.96639	0.00301321	0.0428334
Astrocytes	AL162411.1	34.9665	-0.476095	0.160532	-2.96573	0.00301961	0.0428956
Astrocytes	RHOB	242.669	-0.390422	0.131675	-2.96503	0.00302653	0.0429649
Astrocytes	STK10	23.9598	0.420136	0.141753	2.96387	0.00303798	0.0430986
Astrocytes	AC010096.1	1.99379	-0.840146	0.283506	-2.96342	0.00304246	0.0431331
Astrocytes	NCAM1	2315.11	-0.22607	0.0763062	-2.96267	0.00304982	0.0432085
Astrocytes	GPATCH8	651.752	-0.185406	0.0626095	-2.9613	0.00306344	0.0433724
Astrocytes	SNX24	213.853	-0.235468	0.0795282	-2.96081	0.00306832	0.0434124
Astrocytes	ITIH4	35.908	-0.437224	0.147702	-2.96018	0.0030746	0.0434721
Astrocytes	HEXB	34.2098	0.235127	0.0794626	2.95896	0.00308679	0.0436153
Astrocytes	AC022382.1	1.12786	-0.915621	0.309503	-2.95836	0.00309279	0.043671
Astrocytes	AC096677.1	45.5446	0.330058	0.111616	2.95708	0.00310568	0.0437945
Astrocytes	BTN2A1	25.4328	0.226583	0.0766218	2.95716	0.00310485	0.0437945
Astrocytes	NDST2	24.8533	-0.303012	0.102495	-2.95637	0.00311287	0.0438665
Astrocytes	LHFPL6	1396.69	-0.324281	0.109759	-2.95448	0.003132	0.0441068
Astrocytes	HSPE1	121.621	-0.773137	0.261718	-2.95409	0.00313597	0.0441332
Astrocytes	MARCH5	147.362	-0.208208	0.0705182	-2.95254	0.00315168	0.0443249
Astrocytes	NBEA	586.488	-0.244983	0.0829972	-2.9517	0.00316025	0.0444158
Astrocytes	LAPTM5	1.73229	0.967066	0.327858	2.94965	0.00318139	0.0445943
Astrocytes	NBPF14	86.5812	-0.268823	0.0911298	-2.94989	0.00317886	0.0445943
Astrocytes	G0S2	7.38851	-1.44695	0.490522	-2.94981	0.00317965	0.0445943
Astrocytes	TNRC18	283.979	-0.228189	0.0773538	-2.94994	0.00317836	0.0445943
Astrocytes	LINC01473	1982.37	-0.230253	0.078118	-2.9475	0.00320351	0.0448747
Astrocytes	NOXRED1	33.3714	-0.272727	0.092545	-2.94697	0.00320904	0.0449222
Astrocytes	AL442071.2	10.4361	0.681356	0.231288	2.94592	0.00321994	0.0449855
Astrocytes	MUC1	17.4722	0.491965	0.166984	2.94618	0.00321724	0.0449855
Astrocytes	TKTL1	1.47712	0.945432	0.320923	2.94598	0.00321937	0.0449855
Astrocytes	STEAP3	13.8267	0.719991	0.244589	2.94368	0.00324334	0.045224
Astrocytes	SPAG16	388.545	-0.290262	0.0986055	-2.94367	0.00324343	0.045224
Astrocytes	GABRB2	75.0265	0.578907	0.196639	2.94401	0.00323986	0.045224
Astrocytes	EFL1	84.0366	-0.28003	0.0951499	-2.94304	0.00325003	0.0452862
Astrocytes	TSPAN7	896.943	-0.333973	0.113494	-2.94265	0.00325412	0.0453133
Astrocytes	KANSL3	110.06	-0.197755	0.0672346	-2.94127	0.00326868	0.0454561
Astrocytes	CLN5	63.8497	-0.234251	0.0796395	-2.9414	0.00326736	0.0454561
Astrocytes	FAM81B	2.12375	1.06122	0.360988	2.93976	0.00328465	0.0455883
Astrocytes	AC018638.7	18.8475	-0.437315	0.14875	-2.93992	0.00328296	0.0455883
Astrocytes	RHBDF1	14.5835	-0.393107	0.133702	-2.94016	0.00328043	0.0455883
Astrocytes	KLHL3	94.1301	-0.222781	0.0757897	-2.93946	0.00328784	0.0456026
Astrocytes	THRB-IT1	8.68768	-0.460564	0.156701	-2.93912	0.00329145	0.0456228
Astrocytes	MDK	8.42588	-0.54526	0.18554	-2.93878	0.00329507	0.045643
Astrocytes	MPPED1	6.87252	0.544217	0.185237	2.93794	0.00330401	0.0457369
Astrocytes	TNKS2	259.634	-0.185772	0.063244	-2.93738	0.00330999	0.0457896
Astrocytes	PLD6	9.77694	-0.456921	0.155574	-2.93701	0.00331391	0.0458139
Astrocytes	ABRACL	8.20051	0.429877	0.146441	2.9355	0.00333013	0.045918
Astrocytes	TTLL6	25.0069	-0.564796	0.192385	-2.93575	0.00332737	0.045918
Astrocytes	LRRC37A3	120.471	-0.226022	0.0769946	-2.93555	0.00332952	0.045918
Astrocytes	AC073534.2	3.6353	-0.542333	0.184728	-2.93585	0.00332631	0.045918
Astrocytes	AC132938.6	1.88553	0.870284	0.296542	2.93477	0.00333791	0.0459952
Astrocytes	TRNP1	3.82127	0.767133	0.261528	2.93328	0.00335405	0.0461308
Astrocytes	BMP2K	1038.07	-0.276525	0.0942936	-2.9326	0.00336137	0.0461308
Astrocytes	RAB3C	30.6671	0.523902	0.178657	2.93245	0.00336303	0.0461308
Astrocytes	CHD7	316.287	-0.229816	0.0783517	-2.93314	0.00335558	0.0461308
Astrocytes	LCNL1	151.084	-0.451973	0.154067	-2.93361	0.00335043	0.0461308
Astrocytes	MINPP1	52.2723	-0.301729	0.10289	-2.93255	0.00336189	0.0461308
Astrocytes	A1BG	3.5575	0.652935	0.222643	2.93265	0.00336079	0.0461308
Astrocytes	AEBP1	135.746	0.583578	0.199052	2.93179	0.00337012	0.0461383
Astrocytes	UNG	49.3799	-0.245389	0.0836917	-2.93205	0.00336729	0.0461383
Astrocytes	YLPM1	303.359	-0.199461	0.0680383	-2.93159	0.0033723	0.0461383
Astrocytes	CTXND1	128.434	-0.440045	0.150093	-2.93181	0.00336991	0.0461383
Astrocytes	JHY	23.5102	0.657475	0.224319	2.93099	0.00337885	0.0461981
Astrocytes	FAM189A2	1634.24	0.528099	0.1802	2.93063	0.00338279	0.0462219
Astrocytes	AC066613.2	7.86404	0.552683	0.188627	2.93002	0.00338935	0.0462817
Astrocytes	MGST3	209.883	0.239414	0.0817232	2.92957	0.00339436	0.0462903
Astrocytes	DPM1	119.352	-0.203253	0.0693756	-2.92974	0.00339246	0.0462903
Astrocytes	EVA1C	204.035	0.361572	0.123434	2.92928	0.00339753	0.0463037
Astrocytes	TMEM65	149.135	0.289161	0.0987243	2.92897	0.00340084	0.0463189
Astrocytes	MXD1	102.273	-0.482459	0.164771	-2.92806	0.00341082	0.046395
Astrocytes	HCG27	18.7088	0.365139	0.124701	2.92812	0.00341022	0.046395
Astrocytes	TLCD4	192.736	-0.289926	0.0990268	-2.92776	0.00341416	0.0464011
Astrocytes	SP3	182.148	-0.176097	0.0601541	-2.92743	0.00341776	0.0464011
Astrocytes	HS3ST1	2.39107	0.703593	0.240374	2.92707	0.00342169	0.0464011
Astrocytes	ATP6V1G2	26.982	0.564675	0.192906	2.9272	0.00342028	0.0464011
Astrocytes	AC067750.1	8.46468	0.417763	0.142726	2.92702	0.00342224	0.0464011
Astrocytes	AC096637.1	3.23465	0.915185	0.312735	2.92639	0.00342917	0.046441
Astrocytes	OPTN	82.618	0.265132	0.0906015	2.92636	0.00342958	0.046441
Astrocytes	WDR20	219.708	-0.17049	0.0582669	-2.92603	0.00343321	0.0464604
Astrocytes	ARHGEF3-AS1	2.50076	1.11309	0.380449	2.92573	0.00343644	0.0464713
Astrocytes	PLXND1	50.3376	0.380726	0.130141	2.9255	0.00343907	0.0464713
Astrocytes	EXTL3	98.766	-0.263748	0.0901763	-2.92481	0.00344667	0.0464713
Astrocytes	TSG101	111.043	-0.168301	0.057535	-2.92519	0.00344248	0.0464713
Astrocytes	NXPE2	2.53899	-0.735888	0.251606	-2.92476	0.00344721	0.0464713
Astrocytes	ARID4A	263.78	-0.188969	0.0646058	-2.92495	0.00344511	0.0464713
Astrocytes	STARD13	1040.42	-0.294065	0.10056	-2.92428	0.00345256	0.0465025
Astrocytes	GLRA2	3.34214	0.641207	0.21928	2.92416	0.00345392	0.0465025
Astrocytes	PTPN14	164.895	-0.208531	0.0713253	-2.92367	0.00345936	0.0465461
Astrocytes	CPNE9	8.20428	0.521041	0.178281	2.92259	0.00347138	0.0466781
Astrocytes	EGFL7	5.44007	0.685371	0.234535	2.92226	0.00347502	0.0466841
Astrocytes	AC018557.1	16.4478	0.442638	0.151477	2.92215	0.00347624	0.0466841
Astrocytes	HNRNPDL	287.942	0.255498	0.087447	2.92174	0.00348081	0.0467002
Astrocytes	NR4A3	26.0595	-1.23208	0.421794	-2.92105	0.00348849	0.0467002
Astrocytes	EFCAB3	15.5569	1.03987	0.355938	2.92149	0.00348356	0.0467002
Astrocytes	OGFOD3	16.6626	0.30716	0.105147	2.92125	0.00348628	0.0467002
Astrocytes	SMOX	138.264	-0.213438	0.0730647	-2.92122	0.00348664	0.0467002
Astrocytes	S1PR1	81.8409	-0.383026	0.131144	-2.92064	0.00349309	0.0467026
Astrocytes	TANC1	306.67	0.3911	0.133904	2.92074	0.00349203	0.0467026
Astrocytes	AC026471.1	7.34877	0.432091	0.147965	2.92023	0.00349771	0.0467348
Astrocytes	CPEB3	956.251	-0.311503	0.106679	-2.91999	0.00350041	0.0467415
Astrocytes	SLC22A14	6.29135	0.52052	0.17835	2.91854	0.00351679	0.0468545
Astrocytes	AC092691.1	5805.93	-0.276859	0.0948651	-2.91845	0.00351775	0.0468545
Astrocytes	TNKS	770.804	-0.201227	0.0689383	-2.91894	0.00351227	0.0468545
Astrocytes	COL13A1	3.64675	0.844664	0.28939	2.91877	0.00351413	0.0468545
Astrocytes	SLC38A11	3.96359	0.797095	0.273174	2.9179	0.00352397	0.0469079
Astrocytes	RERE	1266.62	-0.171387	0.0587674	-2.91636	0.00354142	0.0470595
Astrocytes	AC021086.1	57.9049	-0.356317	0.122174	-2.91648	0.00354004	0.0470595
Astrocytes	TRPM3	5009.19	-0.362364	0.124259	-2.91621	0.00354309	0.0470595
Astrocytes	WASF3	549.429	-0.305199	0.10466	-2.91611	0.00354427	0.0470595
Astrocytes	PRKCQ	76.9582	0.537239	0.18427	2.9155	0.00355122	0.0471223
Astrocytes	LINC02327	10.8451	-0.620261	0.212765	-2.91524	0.00355411	0.047131
Astrocytes	MB21D2	50.0593	-0.396803	0.136137	-2.91474	0.00355982	0.0471476
Astrocytes	ZBTB33	33.321	0.347278	0.119143	2.9148	0.00355913	0.0471476
Astrocytes	VPS50	228.057	-0.228501	0.0784092	-2.91421	0.00356585	0.0471853
Astrocytes	SDC2	415.162	-0.289013	0.0991839	-2.91391	0.00356937	0.0471853
Astrocytes	HEPH	237.343	-0.299031	0.102619	-2.91398	0.00356854	0.0471853
Astrocytes	DDAH1	1175.82	-0.222978	0.0765502	-2.91284	0.00358162	0.0473177
Astrocytes	FEZF2	18.0775	-0.40252	0.13823	-2.91197	0.00359161	0.047353
Astrocytes	CLRN1-AS1	5.73696	-0.604838	0.207699	-2.91209	0.00359024	0.047353
Astrocytes	PCDHGA12	10.4347	0.455078	0.156312	2.91135	0.00359868	0.047353
Astrocytes	AL590550.1	24.4602	-0.559173	0.192057	-2.91149	0.00359708	0.047353
Astrocytes	CTSC	2.88019	0.673007	0.231175	2.91124	0.00359997	0.047353
Astrocytes	FMNL3	72.0212	-0.543388	0.18665	-2.91127	0.00359963	0.047353
Astrocytes	SEPTIN4	76.7353	-0.415831	0.142786	-2.91226	0.00358823	0.047353
Astrocytes	ZBTB7C	291.143	0.347448	0.119368	2.91073	0.00360582	0.0474004
Astrocytes	NRP2	25.9814	0.769168	0.264339	2.90978	0.00361684	0.0475158
Astrocytes	TEX9	239.032	-0.389774	0.133966	-2.9095	0.00362008	0.0475288
Astrocytes	B3GALNT2	148.208	-0.204368	0.0702607	-2.90871	0.00362922	0.0475601
Astrocytes	ACKR3	80.8506	-0.317826	0.109266	-2.90874	0.00362888	0.0475601
Astrocytes	NOTCH3	12.1512	0.567334	0.195042	2.90878	0.00362846	0.0475601
Astrocytes	SRPK2	645.154	-0.142262	0.0489169	-2.90823	0.00363478	0.0476035
Astrocytes	ABITRAM	35.8046	-0.222762	0.0766195	-2.90739	0.00364464	0.0476565
Astrocytes	FBXW2	87.8495	-0.246469	0.0847695	-2.90752	0.00364311	0.0476565
Astrocytes	TEAD2	2.90524	1.00526	0.345772	2.9073	0.00364559	0.0476565
Astrocytes	SH2D5	1.67143	1.02782	0.353556	2.90709	0.00364813	0.0476602
Astrocytes	ZFYVE28	425.49	0.57626	0.198305	2.90592	0.00366171	0.0478081
Astrocytes	STK31	7.04575	-0.590192	0.203125	-2.90556	0.00366598	0.0478342
Astrocytes	SNUPN	44.6576	0.260066	0.0895336	2.90468	0.0036763	0.0479393
Astrocytes	OSBPL3	396.643	-0.501663	0.172762	-2.90378	0.00368688	0.0480476
Astrocytes	MBOAT2	598.7	-0.210783	0.0725951	-2.90355	0.00368964	0.0480539
Astrocytes	CTDSPL	934.303	-0.327995	0.112986	-2.90299	0.00369624	0.0480807
Astrocytes	SLC25A18	731.81	-0.280993	0.096792	-2.90306	0.0036954	0.0480807
Astrocytes	ZMYM2	608.985	-0.198552	0.0684035	-2.90266	0.00370012	0.0481015
Astrocytes	LCLAT1	138.312	-0.257122	0.0886097	-2.90174	0.00371098	0.048213
Astrocytes	PDE8B	568.445	0.518203	0.178602	2.90144	0.00371446	0.0482287
Astrocytes	GPCPD1	166.205	-0.454624	0.156751	-2.9003	0.00372812	0.0483763
Astrocytes	GCLC	208.66	-0.282006	0.0972715	-2.89917	0.00374156	0.0485209
Astrocytes	C11orf87	13.5658	0.701157	0.241917	2.89834	0.00375144	0.0486193
Astrocytes	SPRY3	13.1945	-0.358607	0.123792	-2.89684	0.0037694	0.0488221
Astrocytes	F3	871.322	0.567543	0.195941	2.8965	0.0037735	0.0488452
Astrocytes	AC116362.1	43.0196	-0.482663	0.166706	-2.89529	0.00378804	0.0490034
Astrocytes	ST6GALNAC5	118.264	-0.479103	0.165514	-2.89464	0.00379599	0.0490762
Astrocytes	CCDC40	65.6992	0.272228	0.0940815	2.89354	0.00380926	0.0492177
Astrocytes	ABCD3	226.064	-0.227627	0.0787299	-2.89123	0.00383735	0.049357
Astrocytes	CIART	13.6078	-0.450122	0.155711	-2.89074	0.00384332	0.049357
Astrocytes	AL357568.2	7.62564	-0.504582	0.174525	-2.89118	0.00383802	0.049357
Astrocytes	CDC42BPA	1359.93	-0.245335	0.0848521	-2.89133	0.00383617	0.049357
Astrocytes	TMEM216	17.4133	-0.29784	0.103009	-2.89141	0.00383523	0.049357
Astrocytes	UBASH3B	110.808	0.662312	0.22905	2.89157	0.00383327	0.049357
Astrocytes	OVCH1-AS1	3.16006	0.640236	0.221478	2.89074	0.00384339	0.049357
Astrocytes	DENND5B	672.5	-0.173561	0.0600354	-2.89097	0.00384052	0.049357
Astrocytes	ZNF626	135.602	-0.194222	0.0671746	-2.8913	0.00383648	0.049357
Astrocytes	ZNF133	91.9296	-0.294477	0.101843	-2.89148	0.00383429	0.049357
Astrocytes	PCNT	86.2853	0.230719	0.0798252	2.8903	0.00384873	0.0493956
Astrocytes	AC002074.1	6.83294	1.52632	0.528158	2.88989	0.00385372	0.0494295
Astrocytes	MRTFB	444.082	0.352068	0.121863	2.88904	0.00386423	0.0495343
Astrocytes	BMPR1B	2547.28	-0.270715	0.093727	-2.88833	0.00387288	0.0496151
Astrocytes	SEC11A	111.028	-0.171525	0.0594043	-2.88741	0.00388425	0.0497307
Astrocytes	LINC02796	2.52693	-0.731592	0.253549	-2.8854	0.00390916	0.0500193
Astrocytes	RAD51B	828.979	-0.251399	0.0871398	-2.88501	0.00391398	0.0500507
Astrocytes	AL357078.2	3.29825	-0.506075	0.175495	-2.88369	0.0039304	0.0502092
Astrocytes	TFB1M	98.845	-0.27111	0.0940175	-2.88361	0.00393144	0.0502092
Astrocytes	AL691403.1	4.14653	-0.645157	0.22377	-2.88313	0.0039375	0.0502092
Astrocytes	GDPD3	8.25826	0.403683	0.140019	2.88307	0.00393826	0.0502092
Astrocytes	ZNF57	6.30695	-0.41859	0.145185	-2.88314	0.00393734	0.0502092
Astrocytes	ADH5	59.0183	-0.231019	0.0801351	-2.88287	0.00394075	0.0502107
Astrocytes	AC111170.1	4.66329	0.733425	0.254482	2.88203	0.00395123	0.0503139
Astrocytes	RTN4RL1	11.4997	0.703169	0.244002	2.88182	0.00395384	0.0503168
Astrocytes	LINC02740	32.3005	-0.360389	0.125132	-2.88007	0.00397586	0.0505413
Astrocytes	TPP2	183.192	-0.195805	0.067987	-2.88004	0.00397626	0.0505413
Astrocytes	LRRC49	215.446	-0.25414	0.0882504	-2.87976	0.00397973	0.0505551
Astrocytes	PLPPR4	16.9714	0.518271	0.179997	2.87933	0.00398524	0.0505946
Astrocytes	AC009126.1	82.83	-0.3824	0.132847	-2.8785	0.00399571	0.0506971
Astrocytes	ATP1A1	108.65	0.525949	0.182758	2.87784	0.00400406	0.0507268
Astrocytes	KCNC2	33.9335	0.588199	0.204396	2.87775	0.00400525	0.0507268
Astrocytes	RAB9A	61.8737	-0.217115	0.0754407	-2.87795	0.00400266	0.0507268
Astrocytes	AC067773.1	9.0079	-0.715814	0.248767	-2.87745	0.00400908	0.0507307
Astrocytes	SMAD4	251.332	-0.192201	0.0667981	-2.87735	0.00401036	0.0507307
Astrocytes	NOTCH2	537.915	-0.220852	0.0767623	-2.87709	0.00401362	0.0507415
Astrocytes	ABHD6	53.5303	0.233961	0.0813527	2.87589	0.0040289	0.0507783
Astrocytes	SYNPR	17.0958	0.489735	0.170274	2.87616	0.00402545	0.0507783
Astrocytes	C5orf51	46.119	-0.218501	0.0759766	-2.87589	0.00402888	0.0507783
Astrocytes	IGSF22	2.43082	0.743003	0.25837	2.87573	0.00403094	0.0507783
Astrocytes	SPOP	350.583	-0.201449	0.0700312	-2.87657	0.00402028	0.0507783
Astrocytes	LONRF3	73.2787	-0.424212	0.14749	-2.87622	0.00402469	0.0507783
Astrocytes	TIFA	1.59708	0.822317	0.28598	2.87544	0.00403467	0.050795
Astrocytes	SPOCK1	674.678	0.282832	0.0983772	2.87497	0.00404061	0.0508395
Astrocytes	AL646090.2	8.91996	-0.842696	0.293178	-2.87435	0.00404856	0.0509093
Astrocytes	OCIAD2	5.32319	0.84751	0.294875	2.87413	0.00405138	0.0509145
Astrocytes	KCND3	320.159	0.453243	0.157725	2.87363	0.0040578	0.0509183
Astrocytes	ENTR1	29.6194	0.287185	0.0999541	2.87317	0.00406373	0.0509183
Astrocytes	FKBP4	38.5748	-0.626018	0.217878	-2.87325	0.00406275	0.0509183
Astrocytes	AL133166.1	7.18266	-0.540457	0.188064	-2.8738	0.00405568	0.0509183
Astrocytes	CDH5	1.35211	0.831956	0.289537	2.8734	0.00406081	0.0509183
Astrocytes	RNGTT	353.351	-0.198883	0.0692344	-2.87261	0.00407098	0.0509789
Astrocytes	PRKCZ	14.8323	0.465462	0.162141	2.87072	0.00409536	0.0511604
Astrocytes	ZIC4	18.4103	0.576686	0.200856	2.87113	0.00409001	0.0511604
Astrocytes	SPARCL1	3503.09	-0.288926	0.10065	-2.8706	0.00409696	0.0511604
Astrocytes	CNOT4	443.643	-0.187246	0.0652301	-2.87055	0.00409757	0.0511604
Astrocytes	AL021308.1	14.6117	-0.425936	0.148354	-2.87108	0.00409076	0.0511604
Astrocytes	MPP6	303.557	-0.30702	0.10697	-2.87017	0.00410257	0.0511925
Astrocytes	NUDT16	16.3026	-0.312653	0.108961	-2.86941	0.00411236	0.0512844
Astrocytes	METTL2A	24.7056	0.271741	0.0947099	2.8692	0.00411516	0.0512891
Astrocytes	C9orf40	6.54226	0.437392	0.152454	2.869	0.00411771	0.0512906
Astrocytes	SPATA22	22.1153	-0.392575	0.136873	-2.86816	0.00412867	0.0513968
Astrocytes	ATP23	8.52749	0.462097	0.161124	2.86795	0.00413136	0.0514
Astrocytes	TDRP	105.891	-0.220305	0.0768519	-2.86662	0.00414879	0.0515259
Astrocytes	SIRT1	74.3531	-0.188411	0.065722	-2.86679	0.00414658	0.0515259
Astrocytes	AC007780.1	11.4479	-0.505496	0.17632	-2.86693	0.00414471	0.0515259
Astrocytes	OSBPL1A	834.534	-0.388119	0.13542	-2.86603	0.00415653	0.0515918
Astrocytes	TATDN3	63.1209	-0.304378	0.106232	-2.86522	0.00416722	0.0516854
Astrocytes	PCBP4	47.3053	-0.296507	0.103496	-2.86492	0.00417113	0.0516854
Astrocytes	SAXO2	47.0045	-0.349291	0.121921	-2.8649	0.00417141	0.0516854
Astrocytes	POLR3A	91.3622	0.267178	0.0932652	2.86471	0.00417395	0.0516865
Astrocytes	AL359921.1	13.5521	-0.403668	0.14096	-2.86371	0.00418711	0.0517283
Astrocytes	GHR	60.5379	0.460918	0.16094	2.86391	0.00418447	0.0517283
Astrocytes	AL034348.1	80.2027	-0.42282	0.147623	-2.86419	0.00418081	0.0517283
Astrocytes	MIR7-3HG	2.9759	0.662545	0.231356	2.86375	0.00418664	0.0517283
Astrocytes	CCR6	4.4981	-0.487893	0.170386	-2.86345	0.00419055	0.0517406
Astrocytes	MEGF10	879.13	-0.28594	0.0998686	-2.86316	0.00419435	0.0517572
Astrocytes	JADE1	85.0028	-0.291455	0.101823	-2.86236	0.00420499	0.0517823
Astrocytes	SKIDA1	9.11004	-0.382023	0.133468	-2.86228	0.0042061	0.0517823
Astrocytes	SENP1	88.0327	-0.194423	0.0679192	-2.86256	0.0042023	0.0517823
Astrocytes	TCHP	75.0731	0.206865	0.0722732	2.86227	0.00420618	0.0517823
Astrocytes	AP002008.1	1.31188	-0.895005	0.312743	-2.86179	0.00421257	0.0518308
Astrocytes	AC022087.1	1.70086	0.925874	0.323554	2.86157	0.00421545	0.0518361
Astrocytes	LIMD1-AS1	6.53255	0.401156	0.140205	2.8612	0.00422038	0.0518424
Astrocytes	LINC01516	1.61597	-0.797583	0.278762	-2.86117	0.00422087	0.0518424
Astrocytes	GSTM5	49.4523	-0.597314	0.208825	-2.86036	0.00423158	0.0518534
Astrocytes	DMGDH	284.422	-0.306429	0.107121	-2.86059	0.00422855	0.0518534
Astrocytes	PPP2R2B-IT1	2.99149	-0.678291	0.237133	-2.86038	0.00423137	0.0518534
Astrocytes	ADAMTS2	2.9882	0.614532	0.214815	2.86075	0.00422635	0.0518534
Astrocytes	AC022075.1	7.56555	-0.563781	0.197137	-2.85984	0.00423855	0.0519087
Astrocytes	AC091138.1	3.01925	0.682075	0.238532	2.85948	0.00424343	0.0519384
Astrocytes	ZNF800	136.362	-0.252591	0.0883463	-2.8591	0.00424841	0.0519693
Astrocytes	AC095032.1	26.1704	-0.392189	0.137202	-2.85848	0.00425671	0.0519893
Astrocytes	INTU	590.765	-0.213954	0.0748502	-2.85843	0.00425742	0.0519893
Astrocytes	FRK	27.0568	-0.423124	0.148014	-2.85867	0.00425423	0.0519893
Astrocytes	NAP1L3	42.0432	0.556598	0.194764	2.8578	0.00426584	0.052062
Astrocytes	NLRC5	43.627	0.444713	0.15565	2.85712	0.00427498	0.0521434
Astrocytes	GALNT10	158.014	0.396969	0.138996	2.85598	0.0042904	0.0523013
Astrocytes	PROM1	8.43487	1.01888	0.35681	2.85553	0.00429645	0.0523449
Astrocytes	GBP3	9.51611	0.702207	0.245956	2.85501	0.00430353	0.052401
Astrocytes	NBPF9	46.063	-0.238582	0.0835781	-2.8546	0.00430914	0.0524088
Astrocytes	AC116345.1	1.38469	1.03618	0.362979	2.85467	0.00430821	0.0524088
Astrocytes	DMRTC1B	1.37084	-0.730551	0.25601	-2.85361	0.00432261	0.0525425
Astrocytes	NMT1	243.604	0.230099	0.0806517	2.85299	0.00433097	0.0526138
Astrocytes	ENO2	130.713	0.417544	0.14637	2.85266	0.00433553	0.052639
Astrocytes	SBNO1	177.343	-0.131437	0.0460849	-2.85207	0.00434354	0.0527059
Astrocytes	GGT5	13.1555	0.929555	0.325946	2.85187	0.00434634	0.0527096
Astrocytes	AL161772.1	23.1843	-0.420935	0.147637	-2.85115	0.00435609	0.0527976
Astrocytes	AL355312.3	23.3784	-0.393831	0.138186	-2.85002	0.0043717	0.0529202
Astrocytes	IFITM10	7.4793	0.465299	0.16327	2.84987	0.00437371	0.0529202
Astrocytes	IGFBP6	2.5509	0.883288	0.30993	2.84996	0.0043725	0.0529202
Astrocytes	RSRC1	312.622	-0.220365	0.0773302	-2.84966	0.00437662	0.0529251
Astrocytes	AC127024.6	5.00644	-0.484135	0.169993	-2.84796	0.00440001	0.0531775
Astrocytes	AC015908.2	58.2677	0.490471	0.172233	2.84772	0.0044033	0.0531869
Astrocytes	PCDHB12	23.4887	0.392997	0.138029	2.8472	0.00441055	0.053244
Astrocytes	SRGAP2B	17.8705	0.382863	0.13448	2.84698	0.00441356	0.0532499
Astrocytes	ARMCX4	254.477	-0.27952	0.0981937	-2.84662	0.00441855	0.0532797
Astrocytes	DLD	85.1441	-0.200615	0.0704885	-2.84607	0.00442627	0.0533424
Astrocytes	AL021368.2	51.6959	-0.252445	0.0887753	-2.84364	0.00446021	0.0537207
Astrocytes	AL133243.3	18.1827	-0.293974	0.103389	-2.84338	0.00446381	0.0537225
Astrocytes	ROS1	3.73017	0.632836	0.222574	2.84326	0.00446544	0.0537225
Astrocytes	HERPUD2	248.94	-0.247947	0.0872195	-2.84279	0.00447207	0.0537717
Astrocytes	GRAMD1B	439.104	-0.283084	0.0996234	-2.84154	0.00448965	0.0539461
Astrocytes	PDXK	215.072	0.262764	0.0924773	2.84139	0.00449168	0.0539461
Astrocytes	ERC1	802.741	-0.218736	0.077021	-2.83996	0.00451196	0.0541589
Astrocytes	ZNF709	87.3898	-0.24704	0.0870005	-2.83952	0.00451808	0.0542016
Astrocytes	FPGT	134.965	-0.272646	0.0960868	-2.8375	0.00454685	0.054449
Astrocytes	NBPF11	49.134	-0.255521	0.0900563	-2.83735	0.00454901	0.054449
Astrocytes	TPD52L1	2444.61	-0.29209	0.10294	-2.83748	0.00454719	0.054449
Astrocytes	ZNF532	523.584	-0.185452	0.0653606	-2.83737	0.00454865	0.054449
Astrocytes	PPP2R1B	179.665	-0.219416	0.0773724	-2.83585	0.00457041	0.0546743
Astrocytes	PA2G4	42.8971	0.262893	0.0927226	2.83526	0.00457879	0.0547434
Astrocytes	ZNF609	594.536	-0.230117	0.0811884	-2.83435	0.00459183	0.0548392
Astrocytes	ZNF497	10.4617	0.342584	0.120869	2.83434	0.00459199	0.0548392
Astrocytes	PTPRM	790.825	-0.180461	0.0636756	-2.83407	0.00459589	0.0548549
Astrocytes	CFAP161	9.70929	0.585868	0.206774	2.83337	0.00460607	0.0549453
Astrocytes	TNFSF14	2.52494	1.15629	0.408286	2.83206	0.00462486	0.0551384
Astrocytes	NFIB	2209.42	-0.310219	0.10958	-2.83099	0.00464045	0.055293
Astrocytes	LGALSL-DT	13.8544	-0.484716	0.171244	-2.83055	0.00464675	0.0553058
Astrocytes	MKNK2	93.8937	-0.522306	0.184524	-2.83056	0.0046466	0.0553058
Astrocytes	DMTF1	381.049	-0.224088	0.0792103	-2.82903	0.00466895	0.0555387
Astrocytes	KMO	2.39043	0.953893	0.337207	2.82881	0.00467221	0.0555463
Astrocytes	POGZ	721.597	-0.146348	0.0517484	-2.82807	0.0046829	0.0555686
Astrocytes	ST6GAL2	105.992	-0.493637	0.174578	-2.8276	0.00468987	0.0555686
Astrocytes	SOCS2	5.20603	0.599362	0.211957	2.82775	0.00468769	0.0555686
Astrocytes	AL049870.2	2.65526	-0.603463	0.21341	-2.82772	0.00468812	0.0555686
Astrocytes	ARRB2	14.3679	0.337381	0.11929	2.82825	0.0046803	0.0555686
Astrocytes	AC090844.2	52.3437	0.308968	0.109265	2.82771	0.00468827	0.0555686
Astrocytes	WARS2-AS1	243.513	-0.252133	0.089186	-2.82705	0.0046979	0.0556326
Astrocytes	AL133330.1	10.9103	0.962529	0.340625	2.82578	0.00471663	0.0558006
Astrocytes	GABRA5	6.53611	0.625698	0.22143	2.82571	0.0047176	0.0558006
Astrocytes	MAOA	141.245	-0.319046	0.112915	-2.82555	0.00472	0.0558006
Astrocytes	AC012467.2	6.16351	-0.38478	0.136241	-2.82426	0.00473903	0.055963
Astrocytes	ZNF578	15.4466	-0.38177	0.135167	-2.82443	0.00473642	0.055963
Astrocytes	CDH24	13.427	-0.422036	0.149446	-2.824	0.00474277	0.0559758
Astrocytes	PPM1F	31.8536	0.310241	0.109884	2.82335	0.00475252	0.0560596
Astrocytes	SLC22A18	5.45035	0.636882	0.225638	2.82258	0.00476391	0.0561626
Astrocytes	GREB1	170.868	-0.271932	0.0963836	-2.82135	0.00478216	0.0563464
Astrocytes	TCEAL3	44.9686	0.325754	0.115477	2.82095	0.00478812	0.0563851
Astrocytes	EDRF1	84.9323	-0.176844	0.0626974	-2.8206	0.00479346	0.0564166
Astrocytes	SNHG20	15.3624	-0.280708	0.0995482	-2.81982	0.00480509	0.056522
Astrocytes	LINC02102	7.83394	-0.477086	0.169243	-2.81894	0.00481819	0.0565298
Astrocytes	CWC27	319.914	-0.228185	0.0809395	-2.81921	0.00481426	0.0565298
Astrocytes	FUS	199.501	-0.201083	0.0713272	-2.81916	0.00481499	0.0565298
Astrocytes	MEX3C	33.0494	-0.256296	0.090921	-2.81888	0.00481913	0.0565298
Astrocytes	TMEM255A	21.4479	0.614728	0.218031	2.81946	0.00481052	0.0565298
Astrocytes	AC012370.1	2.52189	-0.650861	0.230916	-2.81861	0.00482322	0.0565326
Astrocytes	AC117464.1	13.5233	-0.821539	0.29148	-2.81851	0.00482472	0.0565326
Astrocytes	JADE2	24.6549	0.315474	0.111947	2.81807	0.00483126	0.0565739
Astrocytes	RIPOR1	51.6797	-0.255652	0.0907237	-2.81792	0.00483359	0.0565739
Astrocytes	AL713852.1	62.9182	-0.403395	0.143195	-2.81709	0.00484608	0.0566887
Astrocytes	WDR6	125.387	-0.272851	0.0968852	-2.81623	0.00485906	0.0567472
Astrocytes	TRHDE-AS1	2.03025	0.748417	0.265743	2.81632	0.00485773	0.0567472
Astrocytes	AC008735.2	8.98472	0.553426	0.196513	2.81623	0.00485914	0.0567472
Astrocytes	CLIC1	2.39658	0.886824	0.314926	2.81597	0.00486295	0.0567604
Astrocytes	UCHL1	105.951	0.7746	0.275125	2.81545	0.00487084	0.0568211
Astrocytes	IGFBP3	1.21159	0.96845	0.344026	2.81505	0.00487693	0.0568607
Astrocytes	PCTP	111.417	-0.405524	0.144066	-2.81485	0.00488002	0.0568654
Astrocytes	AC120193.1	14.3541	0.539221	0.191585	2.81452	0.00488503	0.0568924
Astrocytes	OSBPL9	412.661	-0.204348	0.072635	-2.81336	0.00490267	0.0568954
Astrocytes	GASK1A	487.875	0.348417	0.123827	2.81375	0.00489678	0.0568954
Astrocytes	LINC01994	27.5957	-0.45481	0.161637	-2.81376	0.00489653	0.0568954
Astrocytes	PRDM8	7.1889	0.692226	0.246132	2.81242	0.00491706	0.0568954
Astrocytes	PCDHB9	17.3541	0.373115	0.132658	2.8126	0.00491424	0.0568954
Astrocytes	JAKMIP2	704.579	-0.204275	0.0726104	-2.8133	0.00490361	0.0568954
Astrocytes	AC011346.1	492.598	-0.278045	0.0988379	-2.81314	0.00490602	0.0568954
Astrocytes	RAPGEF5	55.8228	0.447603	0.159147	2.81252	0.00491545	0.0568954
Astrocytes	AC083837.1	124.061	0.766864	0.272558	2.81358	0.00489934	0.0568954
Astrocytes	EPS8L2	29.9169	0.661827	0.235326	2.81238	0.00491758	0.0568954
Astrocytes	GABRB3	129.201	-0.228067	0.0810898	-2.81253	0.00491542	0.0568954
Astrocytes	CPSF4L	4.38459	-0.632511	0.224797	-2.81369	0.00489758	0.0568954
Astrocytes	DERL2	40.6147	-0.237291	0.084387	-2.81194	0.00492444	0.0569436
Astrocytes	PDLIM4	28.7593	0.565601	0.20117	2.81156	0.00493023	0.0569793
Astrocytes	RNF115	363.817	-0.147207	0.0523737	-2.81069	0.0049435	0.0570801
Astrocytes	ATP13A5	159.63	-0.340595	0.121181	-2.81064	0.00494435	0.0570801
Astrocytes	SGO2	42.5033	-0.394344	0.140324	-2.81024	0.00495048	0.0571197
Astrocytes	LINC01798	3.79521	-0.615405	0.219047	-2.80947	0.00496238	0.0571546
Astrocytes	RARRES1	13.03	0.488323	0.173812	2.80949	0.00496202	0.0571546
Astrocytes	DNAJC30	13.873	-0.256046	0.0911305	-2.80966	0.00495934	0.0571546
Astrocytes	AC020907.1	28.9091	0.511077	0.181921	2.80934	0.00496432	0.0571546
Astrocytes	AC021055.1	26.2184	-0.443607	0.158008	-2.80749	0.00499297	0.0573916
Astrocytes	AC110285.2	17.0857	-0.480877	0.171276	-2.80761	0.00499103	0.0573916
Astrocytes	SYCP2	112.866	-0.275104	0.0979897	-2.80748	0.00499306	0.0573916
Astrocytes	LRRC75B	16.5758	-0.33752	0.120236	-2.80715	0.00499819	0.0574195
Astrocytes	NCSTN	32.6099	-0.279855	0.0997147	-2.80655	0.00500748	0.0574949
Astrocytes	ELAVL2	22.448	0.518085	0.184616	2.80628	0.00501175	0.0575127
Astrocytes	UBA6-AS1	670.321	-0.354952	0.126559	-2.80463	0.00503738	0.0575257
Astrocytes	RPP40	3.44551	0.469711	0.167475	2.80466	0.005037	0.0575257
Astrocytes	CADPS2	376.088	-0.226977	0.0809143	-2.80515	0.0050293	0.0575257
Astrocytes	GPALPP1	126.372	-0.146289	0.0521558	-2.80485	0.00503393	0.0575257
Astrocytes	DIAPH3	102.454	-0.558729	0.199195	-2.80493	0.00503273	0.0575257
Astrocytes	BCL2L2	33.5689	0.245889	0.0876444	2.80553	0.00502342	0.0575257
Astrocytes	MNAT1	467.523	-0.207952	0.0741206	-2.80559	0.00502245	0.0575257
Astrocytes	PLA2G4B	26.434	-0.303129	0.108059	-2.80521	0.00502842	0.0575257
Astrocytes	ZNF419	17.5072	-0.268556	0.0957492	-2.80479	0.00503494	0.0575257
Astrocytes	C11orf96	16.9586	1.21567	0.433501	2.80431	0.00504249	0.057553
Astrocytes	ZCCHC7	814.64	-0.192951	0.0688204	-2.80369	0.00505209	0.0576315
Astrocytes	MIR3681HG	20.3068	-0.480655	0.171475	-2.80307	0.00506193	0.0576714
Astrocytes	RELL1	158.286	0.531846	0.189745	2.80295	0.00506378	0.0576714
Astrocytes	AC093305.1	56.3617	0.453501	0.161784	2.80313	0.00506092	0.0576714
Astrocytes	PSME4	357.481	-0.23406	0.0835107	-2.80276	0.00506674	0.0576741
Astrocytes	AL031056.1	36.6575	0.794756	0.283672	2.80167	0.00508391	0.0578383
Astrocytes	NR2E1	69.2875	-0.29444	0.105121	-2.80096	0.00509504	0.0579339
Astrocytes	SP1	88.1591	0.375693	0.134157	2.80041	0.00510377	0.0580019
Astrocytes	C2CD4D-AS1	1.51122	0.798444	0.285157	2.80002	0.00510996	0.058041
Astrocytes	ANO10	317.093	-0.168117	0.0600495	-2.79963	0.00511604	0.0580789
Astrocytes	RXFP1	11.106	0.502751	0.179617	2.79901	0.00512591	0.0581597
Astrocytes	GJA9	8.0381	0.463144	0.165506	2.79836	0.00513634	0.0582155
Astrocytes	HIF1A-AS1	21.0825	-0.438074	0.156539	-2.7985	0.00513409	0.0582155
Astrocytes	HECA	42.0701	-0.228729	0.0817977	-2.79628	0.00516941	0.058559
Astrocytes	F13A1	2.44048	0.78716	0.281577	2.79554	0.00518135	0.0586014
Astrocytes	RASGEF1A	39.7303	0.615075	0.220021	2.79553	0.00518147	0.0586014
Astrocytes	AC022762.1	3.23441	-0.552292	0.197543	-2.79581	0.00517691	0.0586014
Astrocytes	NLGN2	82.1422	0.257777	0.0922265	2.79504	0.00518926	0.058658
Astrocytes	ARHGAP23	92.3092	-0.261083	0.0934307	-2.79441	0.00519947	0.0587421
Astrocytes	FLRT2	1343.84	-0.458648	0.164156	-2.79397	0.00520657	0.0587625
Astrocytes	IGFBP4	1.49965	0.867697	0.310582	2.79378	0.00520962	0.0587625
Astrocytes	KCNJ6	16.1188	0.433114	0.155021	2.79391	0.00520752	0.0587625
Astrocytes	TRIM4	95.0632	-0.219601	0.0786264	-2.79297	0.00522269	0.0588786
Astrocytes	PLCE1-AS2	1.35729	0.960596	0.343973	2.79265	0.00522776	0.0589042
Astrocytes	TDP2	75.7899	-0.203183	0.0727732	-2.792	0.0052383	0.0589915
Astrocytes	CAAP1	148.943	-0.217257	0.0778238	-2.79165	0.00524402	0.0590245
Astrocytes	PPWD1	109.121	-0.253336	0.090762	-2.79121	0.00525109	0.0590726
Astrocytes	AL137802.2	3.49156	-0.599481	0.214829	-2.7905	0.00526269	0.0591567
Astrocytes	ARL6IP5	113.094	0.275442	0.0987103	2.79041	0.00526416	0.0591567
Astrocytes	ELOVL2-AS1	12.8486	-0.363029	0.130147	-2.78938	0.00528091	0.0593134
Astrocytes	CEP128	162.838	-0.312438	0.112056	-2.78823	0.00529962	0.0594604
Astrocytes	ABCC11	12.5206	-0.335859	0.120456	-2.78824	0.00529955	0.0594604
Astrocytes	TBX6	12.6491	0.532071	0.190882	2.78743	0.00531276	0.0595446
Astrocytes	SLC32A1	1.70715	1.11377	0.399551	2.78754	0.00531095	0.0595446
Astrocytes	AKAP7	373.563	-0.23456	0.0841653	-2.78689	0.00532159	0.0595804
Astrocytes	CCND2	81.8696	0.503007	0.180479	2.78706	0.00531889	0.0595804
Astrocytes	CPT2	18.7685	-0.28808	0.103394	-2.78624	0.00533228	0.0595893
Astrocytes	RGS5	74.5099	-0.281105	0.100899	-2.78599	0.00533648	0.0595893
Astrocytes	SAP130	126.714	-0.177697	0.063777	-2.78622	0.00533259	0.0595893
Astrocytes	ETFA	214.617	-0.264139	0.094803	-2.78619	0.00533317	0.0595893
Astrocytes	CTRL	4.0039	-0.491208	0.176306	-2.78611	0.00533446	0.0595893
Astrocytes	ACVR2A	91.9517	-0.284654	0.102205	-2.78514	0.00535051	0.0597077
Astrocytes	MYO10	614.845	-0.255069	0.0915912	-2.78486	0.00535505	0.0597077
Astrocytes	NOMO1	23.1148	-0.232201	0.0833807	-2.78483	0.00535556	0.0597077
Astrocytes	VGLL4	595.794	-0.181251	0.0650955	-2.78438	0.00536295	0.0597126
Astrocytes	ARHGAP24	2075.67	-0.369193	0.132596	-2.78434	0.00536372	0.0597126
Astrocytes	GPR19	33.7413	-0.318605	0.114429	-2.78429	0.00536448	0.0597126
Astrocytes	AC022182.1	2.57686	-0.723986	0.260086	-2.78364	0.0053753	0.0597958
Astrocytes	ETHE1	26.8053	0.429248	0.154212	2.7835	0.0053776	0.0597958
Astrocytes	AC016134.1	5.25654	0.414712	0.148999	2.78332	0.00538054	0.0597969
Astrocytes	RASGRF2	40.6147	0.323846	0.11638	2.78266	0.00539152	0.0598568
Astrocytes	HBA1	2.50991	-0.975573	0.350612	-2.78249	0.00539442	0.0598568
Astrocytes	CD226	29.4471	-0.349985	0.125776	-2.7826	0.00539253	0.0598568
Astrocytes	TENM2	2185.19	-0.435782	0.156635	-2.78215	0.00540006	0.0598879
Astrocytes	STK17A	111.133	-0.300114	0.107888	-2.78171	0.00540726	0.0599364
Astrocytes	PAUPAR	171.982	-0.323304	0.116244	-2.78125	0.00541507	0.0599915
Astrocytes	GCOM1	1.37971	1.32423	0.476173	2.781	0.00541924	0.0600062
Astrocytes	AC073529.1	87.1754	-0.271026	0.0974992	-2.77978	0.00543955	0.0601996
Astrocytes	AC008269.1	120.958	-0.405484	0.145898	-2.77924	0.00544867	0.0602375
Astrocytes	AC083798.2	67.1363	-0.326703	0.117545	-2.77938	0.0054463	0.0602375
Astrocytes	AC110296.1	1.65091	0.836805	0.301164	2.77857	0.00545986	0.0602981
Astrocytes	COL6A2	11.8623	0.833033	0.299793	2.77869	0.00545781	0.0602981
Astrocytes	RRP12	44.7378	0.308684	0.11114	2.77744	0.00547896	0.0604774
Astrocytes	KLHL41	8.74945	-0.392922	0.141497	-2.77688	0.00548827	0.0605485
Astrocytes	ANKRD44	305.037	-0.214374	0.077206	-2.77665	0.00549218	0.0605601
Astrocytes	PRRT4	2.79871	0.708214	0.255106	2.77615	0.00550069	0.0605907
Astrocytes	DCUN1D2-AS	1.34807	0.865345	0.311701	2.77621	0.00549973	0.0605907
Astrocytes	CLIC4	356.817	0.601093	0.216554	2.77572	0.00550802	0.0606354
Astrocytes	NCOA2	939.202	-0.231753	0.0834975	-2.77557	0.00551049	0.0606354
Astrocytes	FADD	5.05665	0.515835	0.185968	2.77379	0.00554078	0.060937
Astrocytes	COL23A1	127.395	-0.481162	0.173495	-2.77335	0.00554817	0.0609866
Astrocytes	AHDC1	217.574	0.267993	0.0966404	2.7731	0.00555252	0.06099
Astrocytes	SYNC	52.6286	0.230612	0.0831735	2.77266	0.00556002	0.06099
Astrocytes	RCHY1	77.6161	-0.212659	0.0766914	-2.77291	0.00555567	0.06099
Astrocytes	PRKAA1	87.1189	-0.200478	0.072302	-2.77278	0.00555793	0.06099
Astrocytes	NFIA	5603.04	-0.225151	0.0812266	-2.77189	0.00557326	0.0611035
Astrocytes	STAM2	169.558	-0.196787	0.0710201	-2.77087	0.0055907	0.0612469
Astrocytes	RHBDL1	14.9774	-0.437224	0.157798	-2.77078	0.00559214	0.0612469
Astrocytes	LUZP1	277.255	-0.153797	0.0555219	-2.77002	0.00560521	0.0612798
Astrocytes	CCDC148	57.7842	-0.403671	0.145722	-2.77014	0.00560328	0.0612798
Astrocytes	RICTOR	356.426	-0.199122	0.0718879	-2.76989	0.00560748	0.0612798
Astrocytes	DPH7	42.0471	-0.198923	0.0718194	-2.76977	0.00560963	0.0612798
Astrocytes	AC003005.2	2.94756	-0.63975	0.230946	-2.77013	0.00560344	0.0612798
Astrocytes	AC046195.1	6.44836	-0.583083	0.210546	-2.76938	0.00561629	0.0612892
Astrocytes	DANT2	1311.49	-0.210857	0.0761356	-2.76949	0.00561444	0.0612892
Astrocytes	ASB1	21.5526	-0.227953	0.0823394	-2.76846	0.00563219	0.061431
Astrocytes	RALA	94.9924	-0.221355	0.07997	-2.76797	0.00564062	0.0614912
Astrocytes	AC092807.3	7.25259	-0.499462	0.180513	-2.7669	0.00565926	0.0616308
Astrocytes	CREB5	75.99	-0.4526	0.163576	-2.76691	0.00565911	0.0616308
Astrocytes	AC021231.1	264.669	-0.399081	0.144253	-2.76653	0.00566567	0.0616688
Astrocytes	EMILIN1	18.7959	0.492475	0.178038	2.76613	0.00567257	0.0617122
Astrocytes	LPIN1	712.565	-0.22134	0.080058	-2.76474	0.00569679	0.0618801
Astrocytes	SCN11A	123.078	-0.450834	0.163046	-2.76507	0.0056911	0.0618801
Astrocytes	CD200	29.6683	0.465068	0.168206	2.76487	0.00569447	0.0618801
Astrocytes	CAMK1G	4.50826	0.674193	0.24391	2.7641	0.00570793	0.0619191
Astrocytes	ZNF189	53.2314	-0.216881	0.0784701	-2.76387	0.0057121	0.0619191
Astrocytes	CEP83	160.809	-0.208908	0.0755721	-2.76435	0.00570355	0.0619191
Astrocytes	LINC00943	9.10616	-0.800939	0.289779	-2.76396	0.00571039	0.0619191
Astrocytes	COL12A1	9.56363	-0.595113	0.21543	-2.76244	0.00573712	0.0620661
Astrocytes	NPM2	5.84921	0.514543	0.186261	2.76248	0.00573649	0.0620661
Astrocytes	NEURL1	6.67218	0.516492	0.186942	2.76285	0.00572998	0.0620661
Astrocytes	HPR	5.80614	-0.550945	0.199443	-2.76242	0.0057374	0.0620661
Astrocytes	KCTD9	68.8716	-0.221369	0.0801407	-2.76225	0.0057404	0.0620668
Astrocytes	PRICKLE2	715.644	-0.34659	0.125548	-2.76063	0.005769	0.0622876
Astrocytes	ZBTB2	19.5976	-0.286515	0.103776	-2.7609	0.00576415	0.0622876
Astrocytes	AP002802.1	2.57925	0.908506	0.329098	2.76059	0.00576967	0.0622876
Astrocytes	XPR1	453.206	-0.236139	0.085565	-2.75976	0.0057843	0.0623501
Astrocytes	POLR2H	52.9536	-0.252599	0.0915216	-2.76	0.00578014	0.0623501
Astrocytes	CAMKK1	42.9906	0.33567	0.121629	2.75979	0.00578387	0.0623501
Astrocytes	STON1-GTF2A1L	3.90916	0.868948	0.314923	2.75924	0.00579362	0.0624188
Astrocytes	MKLN1	2826.08	-0.228646	0.0828899	-2.75843	0.00580801	0.06251
Astrocytes	MBD6	30.8959	-0.282912	0.102558	-2.75856	0.00580568	0.06251
Astrocytes	LARS2-AS1	4.17289	0.510375	0.185051	2.75802	0.00581522	0.062524
Astrocytes	AL158151.3	2.58418	0.744182	0.269809	2.75818	0.00581246	0.062524
Astrocytes	NEK3	48.2121	-0.29024	0.105281	-2.75681	0.00583689	0.062725
Astrocytes	TNFAIP8L1	6.17517	0.396384	0.143847	2.75559	0.00585864	0.0629268
Astrocytes	CAV1	1.53811	0.874761	0.317575	2.7545	0.00587817	0.0631045
Astrocytes	AC068533.3	10.5695	0.475464	0.172633	2.75419	0.0058837	0.0631319
Astrocytes	AC008840.1	9.72378	-0.477422	0.173357	-2.75399	0.00588741	0.0631396
Astrocytes	KIF22	16.2078	-0.302634	0.109914	-2.75337	0.00589844	0.0632258
Astrocytes	CTNND2	10828.9	-0.21502	0.0781022	-2.75306	0.00590412	0.0632546
Astrocytes	TRAF5	23.0044	0.33441	0.121494	2.7525	0.00591427	0.0632612
Astrocytes	HSPA1A	283.014	-0.948218	0.344511	-2.75236	0.00591671	0.0632612
Astrocytes	AC074024.1	6.90918	-0.472182	0.171547	-2.75249	0.00591433	0.0632612
Astrocytes	IQGAP1	181.178	0.249367	0.0905989	2.75243	0.0059155	0.0632612
Astrocytes	ERP44	187.993	-0.183851	0.0668254	-2.75122	0.00593743	0.0634506
Astrocytes	BTRC	492.588	-0.227133	0.0825743	-2.75065	0.00594773	0.0635287
Astrocytes	UBR2	484.318	-0.170915	0.0621735	-2.749	0.00597773	0.0638168
Astrocytes	AF123462.1	101.599	-0.593253	0.215842	-2.74855	0.005986	0.0638683
Astrocytes	AC036108.3	18.0592	0.52759	0.191962	2.7484	0.0059886	0.0638683
Astrocytes	NDST1	122.886	0.175942	0.064023	2.74811	0.00599401	0.0638938
Astrocytes	FAM214B	48.0769	-0.279806	0.101839	-2.74754	0.00600443	0.0639726
Astrocytes	GALNT18	800.116	-0.292216	0.106388	-2.74671	0.00601963	0.0641022
Astrocytes	GPD1L	9.45921	0.464452	0.169115	2.74637	0.00602591	0.0641368
Astrocytes	CPOX	17.4368	-0.276288	0.100627	-2.74566	0.00603889	0.064171
Astrocytes	SLC25A27	164.756	-0.202673	0.0738087	-2.74593	0.00603405	0.064171
Astrocytes	HINFP	27.9696	-0.266912	0.0972169	-2.74553	0.00604126	0.064171
Astrocytes	ASB7	82.8546	-0.215286	0.0784051	-2.74582	0.00603598	0.064171
Astrocytes	BRWD3	189.539	-0.191393	0.0697223	-2.74507	0.00604973	0.0642286
Astrocytes	PPP2R5A	311.836	-0.236627	0.0862128	-2.74468	0.00605694	0.0642728
Astrocytes	FAIM	34.8097	-0.310262	0.113073	-2.74392	0.00607103	0.0643596
Astrocytes	VEPH1	9.08054	0.510386	0.186041	2.7434	0.00608064	0.0643596
Astrocytes	AC067838.1	10.0924	-0.334569	0.121955	-2.74338	0.00608101	0.0643596
Astrocytes	PRXL2C	14.1808	0.336133	0.122538	2.74309	0.00608643	0.0643596
Astrocytes	AP006621.3	77.4127	0.312296	0.113827	2.74359	0.00607721	0.0643596
Astrocytes	VEZT	339.64	-0.176997	0.0645231	-2.74316	0.00608513	0.0643596
[truncated: 581,021+ more rows]

## Sheet: Supplementary Table 4
Supplementary Table 4: ALS patient survival-associated gene expression changes per cell type within primary motor cortex by Cox regression.
Gene	HR	P-value	Lower CI	Upper CI	Cell Type	FDR adjusted P-value
NLGN4Y	0.00612784	8.90761e-06	0.000647143	0.058025	Oligodendrocyte Precursor Cells	0.0562159
SRSF4	0.503628	1.89428e-05	0.367788	0.68964	VIP Interneurons	0.127125
CCDC138	0.508582	4.58247e-05	0.367417	0.703984	Astrocytes	0.150678
TTC3	0.553186	0.000105365	0.410119	0.746159	Astrocytes	0.150678
PCNX4	0.525267	6.92637e-05	0.382504	0.721313	Astrocytes	0.150678
NLGN4Y	0.0318998	5.79319e-05	0.0059496	0.171036	Astrocytes	0.150678
TRIP11	0.565834	0.000109219	0.424042	0.75504	Astrocytes	0.150678
SYNRG	0.542523	0.000131675	0.396523	0.74228	Astrocytes	0.151382
UBE2H	1.65953	0.000231372	1.26731	2.17313	Astrocytes	0.228
ZFYVE9	0.521726	0.000361069	0.364908	0.745937	Astrocytes	0.260188
TECPR2	0.54793	0.000304599	0.395296	0.759499	Astrocytes	0.260188
FIRRE	0.580277	0.000377194	0.429872	0.783306	Astrocytes	0.260188
ANKRD26	0.607769	0.000566101	0.457912	0.806667	Astrocytes	0.260331
BDH2	0.511069	0.000545976	0.349304	0.747749	Astrocytes	0.260331
RNF130	0.535683	0.000521113	0.376503	0.762161	Astrocytes	0.260331
HAT1	1.81263	0.000487745	1.29758	2.53212	Astrocytes	0.260331
ANKMY1	0.614171	0.000562959	0.465557	0.810224	Astrocytes	0.260331
FAM133B	0.552789	0.000839759	0.390352	0.78282	Astrocytes	0.340745
CAPN2	0.580198	0.000814401	0.421854	0.797977	Astrocytes	0.340745
GARS-DT	0.575225	0.000101243	0.435267	0.760186	Microglia	0.343062
LRP6	0.530342	9.07581e-05	0.386034	0.728597	Microglia	0.343062
MEIKIN	0.6178	0.00102596	0.463439	0.823574	Astrocytes	0.372476
UXS1	0.590443	0.0010204	0.431165	0.808558	Astrocytes	0.372476
NASP	0.509347	0.00221423	0.33063	0.784667	Astrocytes	0.393856
EXOC6	0.615706	0.00177465	0.454247	0.834554	Astrocytes	0.393856
SEPTIN11	1.58156	0.00197778	1.1829	2.11457	Astrocytes	0.393856
CPSF7	0.586211	0.00117589	0.424563	0.809404	Astrocytes	0.393856
SRRM2	0.6061	0.00219252	0.439934	0.835028	Astrocytes	0.393856
FASTKD1	0.58033	0.00201139	0.410869	0.819686	Astrocytes	0.393856
QRSL1	0.619512	0.00170622	0.459332	0.83555	Astrocytes	0.393856
PRPF39	0.594196	0.00157191	0.430285	0.820546	Astrocytes	0.393856
MICAL3	0.536445	0.002257	0.359706	0.800023	Astrocytes	0.393856
STK24	1.60095	0.00157891	1.19565	2.14364	Astrocytes	0.393856
PNPT1	0.61392	0.00177856	0.452077	0.833704	Astrocytes	0.393856
AC108047.1	0.647598	0.00219048	0.490417	0.855157	Astrocytes	0.393856
CHD9	0.637724	0.00201587	0.47932	0.848477	Astrocytes	0.393856
NUP98	1.67382	0.00137658	1.22086	2.29482	Astrocytes	0.393856
DCAF5	1.62157	0.00228389	1.18865	2.21218	Astrocytes	0.393856
UBE2B	1.58049	0.0020633	1.18121	2.11473	Astrocytes	0.393856
TOP1	1.6412	0.00181395	1.20215	2.2406	Astrocytes	0.393856
TCAIM	0.600071	0.00189858	0.434736	0.828287	Astrocytes	0.393856
MAN1A2	0.559842	0.00135138	0.392634	0.798256	Astrocytes	0.393856
THRA	0.632883	0.0012128	0.479714	0.834958	Astrocytes	0.393856
HIVEP2	1.56637	0.00130751	1.19139	2.05938	Astrocytes	0.393856
NAV2	0.580966	0.0002084	0.436018	0.7741	Microglia	0.396214
ANXA4	0.571917	0.000233858	0.42468	0.7702	Microglia	0.396214
CAPRIN2	0.605077	0.00257448	0.436458	0.838837	Astrocytes	0.403608
BARD1	1.63305	0.00256005	1.18737	2.24602	Astrocytes	0.403608
TEX15	0.648832	0.00249514	0.490189	0.858818	Astrocytes	0.403608
ENOX2	0.665444	0.00257135	0.510637	0.867183	Astrocytes	0.403608
SOAT1	1.70152	0.00265079	1.20311	2.40643	Astrocytes	0.406336
CTNNA1	1.66191	0.00278888	1.19124	2.31855	Astrocytes	0.409687
IGDCC3	0.64792	0.00295579	0.48667	0.862598	Astrocytes	0.409687
LIMS1	1.52577	0.00296961	1.15461	2.01626	Astrocytes	0.409687
FBXO9	0.576159	0.00292334	0.400699	0.82845	Astrocytes	0.409687
FAS	1.46197	0.00288604	1.13878	1.87687	Astrocytes	0.409687
PLEKHA6	0.659826	0.00335984	0.499748	0.87118	Astrocytes	0.417885
CARF	0.651029	0.00365855	0.487403	0.869585	Astrocytes	0.417885
RAB5A	1.60445	0.00436548	1.15916	2.22079	Astrocytes	0.417885
RANBP9	1.54296	0.00475645	1.14178	2.08508	Astrocytes	0.417885
ZNF274	1.53159	0.00470642	1.13961	2.0584	Astrocytes	0.417885
ETNK1	1.59237	0.00357233	1.16447	2.1775	Astrocytes	0.417885
RAD50	0.696224	0.0053311	0.539676	0.898184	Astrocytes	0.417885
UBE2D3	1.54213	0.00500245	1.13962	2.08681	Astrocytes	0.417885
BPTF	0.622226	0.00413398	0.449904	0.860551	Astrocytes	0.417885
LMF1	0.640511	0.00326683	0.476001	0.861877	Astrocytes	0.417885
MMUT	1.66918	0.00410622	1.17637	2.36844	Astrocytes	0.417885
RAB21	1.48591	0.00430481	1.13217	1.95016	Astrocytes	0.417885
EMP1	1.49972	0.00500842	1.13002	1.99036	Astrocytes	0.417885
USP28	0.661919	0.00469177	0.497264	0.881095	Astrocytes	0.417885
MIOS	0.63574	0.00481527	0.463992	0.871062	Astrocytes	0.417885
RRM2B	1.53808	0.00529083	1.13649	2.08156	Astrocytes	0.417885
RAP1B	1.52851	0.00474737	1.13858	2.05197	Astrocytes	0.417885
GNA14-AS1	1.74858	0.00461213	1.1879	2.57389	Astrocytes	0.417885
MTAP	0.644502	0.00379454	0.478688	0.867752	Astrocytes	0.417885
ZNF585A	0.661399	0.00499266	0.495591	0.882679	Astrocytes	0.417885
GART	0.645961	0.00476347	0.476887	0.874979	Astrocytes	0.417885
DDX6	1.67838	0.00370313	1.1831	2.38101	Astrocytes	0.417885
CASP8AP2	0.618341	0.00438584	0.444223	0.860707	Astrocytes	0.417885
PRPSAP2	0.682724	0.00505062	0.522845	0.891491	Astrocytes	0.417885
CCPG1	0.653439	0.00350153	0.491089	0.869461	Astrocytes	0.417885
COG2	0.627085	0.00471257	0.453693	0.866742	Astrocytes	0.417885
ELOVL5	1.6271	0.00472196	1.16079	2.28072	Astrocytes	0.417885
MAP2K6	0.632423	0.00393242	0.463179	0.86351	Astrocytes	0.417885
CACNA1B	0.640231	0.00516635	0.468383	0.875129	Astrocytes	0.417885
CRIM1	1.51305	0.00414388	1.13998	2.00822	Astrocytes	0.417885
FAM174B	0.610099	0.00529573	0.431082	0.863458	Astrocytes	0.417885
CASKIN1	0.591343	0.00340107	0.416063	0.840466	Astrocytes	0.417885
RBPMS	1.44396	0.00442428	1.12119	1.85965	Astrocytes	0.417885
SHPRH	0.653961	0.00456695	0.487619	0.877046	Astrocytes	0.417885
DSCAM	0.670934	0.00520957	0.507091	0.887716	Astrocytes	0.417885
RBM28	0.616115	0.00480675	0.440001	0.862719	Astrocytes	0.417885
BCCIP	0.627424	0.00453403	0.454748	0.865667	Astrocytes	0.417885
HIF1A-AS3	1.62134	0.00373544	1.16953	2.24767	Astrocytes	0.417885
ZFAND5	1.8736	0.000202597	1.34538	2.6092	Oligodendrocyte Precursor Cells	0.426196
PEAK1	0.583368	0.000202205	0.439033	0.775153	Oligodendrocyte Precursor Cells	0.426196
LHPP	0.610854	0.00571745	0.430643	0.866477	Astrocytes	0.443135
AC077690.1	1.5209	0.0058872	1.1285	2.04974	Astrocytes	0.44642
HIP1R	0.621596	0.00588927	0.443143	0.871913	Astrocytes	0.44642
P4HA2	1.53979	0.00601432	1.13164	2.09515	Astrocytes	0.450943
CYB5D2	0.655805	0.00619428	0.484819	0.887094	Astrocytes	0.459443
AL078602.1	1.57825	0.00635195	1.13722	2.19032	Astrocytes	0.462827
SIRT5	0.651025	0.0063741	0.478262	0.886193	Astrocytes	0.462827
TUT7	0.605834	0.00644395	0.422443	0.86884	Astrocytes	0.463024
AL096854.1	1.50668	0.00653162	1.12133	2.02447	Astrocytes	0.464486
UPF2	0.686784	0.00767891	0.521012	0.905301	Astrocytes	0.465414
EIF2AK4	0.629306	0.00704294	0.449334	0.881363	Astrocytes	0.465414
NFATC2	1.4712	0.0076515	1.10778	1.95386	Astrocytes	0.465414
ZFYVE16	0.691232	0.00754599	0.527195	0.90631	Astrocytes	0.465414
SYBU	1.54274	0.00699216	1.12581	2.11407	Astrocytes	0.465414
BBS2	0.678433	0.00693138	0.511916	0.899114	Astrocytes	0.465414
CPSF2	0.684765	0.00764195	0.518444	0.904443	Astrocytes	0.465414
CLIC4	1.53852	0.00759783	1.12131	2.11096	Astrocytes	0.465414
CEP290	0.675735	0.00725449	0.50759	0.89958	Astrocytes	0.465414
TRAF3	1.52663	0.00776728	1.11803	2.08455	Astrocytes	0.465414
CASC4	0.651007	0.00682497	0.477008	0.888475	Astrocytes	0.465414
A2ML1	0.65164	0.00721176	0.476796	0.890599	Astrocytes	0.465414
ACSL4	1.46703	0.00729451	1.1088	1.94098	Astrocytes	0.465414
KIAA0319L	0.65936	0.00778959	0.485173	0.896082	Astrocytes	0.465414
CHDH	0.670335	0.00661625	0.502245	0.894681	Astrocytes	0.465414
USF2	0.676661	0.00782662	0.507407	0.902373	Astrocytes	0.465414
SAP130	0.641196	0.00713376	0.463861	0.886327	Astrocytes	0.465414
ZFP36	1.51249	0.00710239	1.11908	2.04421	Astrocytes	0.465414
DHX30	0.665624	0.00688739	0.495464	0.894222	Astrocytes	0.465414
BCL2	1.50007	0.00809864	1.1111	2.02521	Astrocytes	0.466906
SLC35A5	0.644054	0.00812245	0.464979	0.892095	Astrocytes	0.466906
ADI1	0.681208	0.00799966	0.51294	0.904676	Astrocytes	0.466906
ZNF236	0.644927	0.00800233	0.466363	0.891859	Astrocytes	0.466906
GAB2	1.4904	0.00827405	1.10834	2.00416	Astrocytes	0.468707
CCND2	1.54363	0.00828968	1.11832	2.1307	Astrocytes	0.468707
PCCB	0.646699	0.0103603	0.463418	0.902468	Astrocytes	0.471632
PNISR	0.680102	0.0117328	0.503916	0.917889	Astrocytes	0.471632
HIF1A	1.54052	0.0112562	1.10293	2.15173	Astrocytes	0.471632
CARD19	1.44461	0.00892582	1.0965	1.90323	Astrocytes	0.471632
PPP1CB	1.47932	0.0108395	1.09455	1.99934	Astrocytes	0.471632
ZNF713	0.679606	0.0105276	0.505509	0.913662	Astrocytes	0.471632
TUBGCP2	0.651607	0.00891369	0.472697	0.898233	Astrocytes	0.471632
ZNF512	1.42146	0.0115005	1.08212	1.86722	Astrocytes	0.471632
PRRC2C	0.65914	0.00958249	0.480858	0.903522	Astrocytes	0.471632
ZNF605	0.688809	0.00976824	0.519148	0.913917	Astrocytes	0.471632
ASXL1	1.44246	0.01148	1.08576	1.91634	Astrocytes	0.471632
DDX46	0.668544	0.010224	0.491667	0.909054	Astrocytes	0.471632
ZNF133	0.632187	0.011294	0.443374	0.901405	Astrocytes	0.471632
CTNNBIP1	0.677845	0.0112004	0.501922	0.91543	Astrocytes	0.471632
TTC37	0.623759	0.0117369	0.432099	0.900432	Astrocytes	0.471632
HMGN3	0.583022	0.0101542	0.386387	0.879726	Astrocytes	0.471632
PGBD5	0.692269	0.0107875	0.521773	0.918476	Astrocytes	0.471632
MKLN1	1.54317	0.010828	1.10533	2.15444	Astrocytes	0.471632
PKIG	1.54106	0.00856199	1.11634	2.12736	Astrocytes	0.471632
ATRN	0.708419	0.0107569	0.543553	0.923291	Astrocytes	0.471632
SH3GLB1	1.53619	0.0100323	1.10793	2.12998	Astrocytes	0.471632
ZSWIM5	0.681047	0.00845526	0.511694	0.906451	Astrocytes	0.471632
AP001831.1	1.4822	0.0100497	1.09843	2.00004	Astrocytes	0.471632
RNF214	0.688626	0.0101375	0.518173	0.915149	Astrocytes	0.471632
INVS	0.666954	0.0106418	0.488782	0.910072	Astrocytes	0.471632
CAMSAP1	0.70473	0.00997105	0.540039	0.919645	Astrocytes	0.471632
EPN2	0.706289	0.0113877	0.539529	0.924591	Astrocytes	0.471632
CEMIP	1.46499	0.0110945	1.09107	1.96706	Astrocytes	0.471632
SETDB1	0.691121	0.00953529	0.522685	0.913835	Astrocytes	0.471632
ZNF780B	0.71038	0.0106947	0.54633	0.92369	Astrocytes	0.471632
SMARCA1	1.49481	0.0103554	1.09929	2.03264	Astrocytes	0.471632
ZNF429	0.677572	0.00971268	0.50446	0.91009	Astrocytes	0.471632
ESF1	0.678716	0.0118284	0.501919	0.917787	Astrocytes	0.471632
KCNJ10	0.649655	0.0116265	0.46471	0.908206	Astrocytes	0.471632
LCORL	0.676074	0.011189	0.499621	0.914847	Astrocytes	0.471632
ZNF43	0.658688	0.0115769	0.476343	0.910834	Astrocytes	0.471632
AC023095.1	0.682188	0.01096	0.508084	0.915952	Astrocytes	0.471632
ARL8B	1.47506	0.00893384	1.1022	1.97404	Astrocytes	0.471632
AC009041.2	0.6214	0.0117306	0.42921	0.899649	Astrocytes	0.471632
OPCML	0.698788	0.010972	0.530156	0.921059	Astrocytes	0.471632
SACS	0.674972	0.00965337	0.501183	0.909022	Astrocytes	0.471632
NDRG1	1.49185	0.0101269	1.09979	2.02368	Astrocytes	0.471632
TIPARP	1.4729	0.0100118	1.09695	1.97771	Astrocytes	0.471632
TUBGCP3	0.665218	0.0113621	0.485162	0.912096	Astrocytes	0.471632
RBM45	0.649542	0.00897444	0.469944	0.897777	Astrocytes	0.471632
LUC7L3	0.574976	0.0118159	0.373707	0.884641	Astrocytes	0.471632
HCG17	0.693811	0.0107514	0.523898	0.91883	Astrocytes	0.471632
PHF3	0.686839	0.0106253	0.514864	0.916258	Astrocytes	0.471632
BRD7	0.677954	0.00855736	0.50742	0.905803	Astrocytes	0.471632
CCDC144A	0.706915	0.0107485	0.541529	0.922811	Astrocytes	0.471632
EPB41	1.49726	0.00906962	1.10567	2.02752	Astrocytes	0.471632
NCOA3	0.65973	0.0120533	0.476811	0.912823	Astrocytes	0.477838
ABCB9	0.699425	0.0122321	0.528786	0.92513	Astrocytes	0.479416
RHEB	1.45642	0.0121754	1.0855	1.9541	Astrocytes	0.479416
KDM3B	0.666229	0.0123049	0.484758	0.915633	Astrocytes	0.479542
TBC1D5	0.665217	0.0124008	0.483277	0.915653	Astrocytes	0.480565
EPAS1	1.44965	0.0127869	1.0822	1.94187	Astrocytes	0.490024
SLC16A2	1.45396	0.0127835	1.0829	1.95218	Astrocytes	0.490024
RNF138	1.38927	0.0128816	1.07216	1.80018	Astrocytes	0.490924
CBFB	1.52576	0.013006	1.09316	2.12955	Astrocytes	0.492941
PSMA3-AS1	0.706575	0.0138294	0.535866	0.931665	Astrocytes	0.494276
KIAA2026	0.668716	0.0133258	0.486233	0.919686	Astrocytes	0.494276
OTUD7B	1.45643	0.0136251	1.08033	1.96347	Astrocytes	0.494276
KIAA1109	0.672639	0.013735	0.490678	0.922076	Astrocytes	0.494276
GAREM2	0.63677	0.0135714	0.444978	0.911227	Astrocytes	0.494276
TLE3	1.39277	0.0138154	1.06989	1.81309	Astrocytes	0.494276
FGF2	1.45354	0.0132308	1.08125	1.95401	Astrocytes	0.494276
BOD1L1	0.685029	0.0134394	0.507506	0.924649	Astrocytes	0.494276
ITPKC	1.4748	0.0136638	1.08298	2.00838	Astrocytes	0.494276
IGF1R	1.39693	0.0136851	1.07093	1.82216	Astrocytes	0.494276
XRCC5	1.42702	0.0137337	1.07546	1.8935	Astrocytes	0.494276
MTHFD1	0.730352	0.0139156	0.568561	0.938183	Astrocytes	0.494793
MIDN	1.49382	0.0141481	1.08407	2.05846	Astrocytes	0.496026
CECR2	1.44875	0.0144281	1.07649	1.94973	Astrocytes	0.496026
CHST3	1.45566	0.0141732	1.07836	1.96497	Astrocytes	0.496026
YBX3	1.49988	0.0144556	1.08384	2.07562	Astrocytes	0.496026
MCL1	1.3767	0.0145255	1.06536	1.77904	Astrocytes	0.496026
ARHGAP23	0.710103	0.014431	0.53976	0.934204	Astrocytes	0.496026
COPG2	0.709584	0.0144307	0.539051	0.934067	Astrocytes	0.496026
RFX4	1.4743	0.0142119	1.08098	2.01071	Astrocytes	0.496026
NAA35	0.699723	0.0172432	0.521552	0.93876	Astrocytes	0.502519
TEFM	0.633554	0.0185588	0.433274	0.926412	Astrocytes	0.502519
SF3B1	0.686186	0.0174144	0.503065	0.935964	Astrocytes	0.502519
RAB18	1.39125	0.0181138	1.05797	1.82954	Astrocytes	0.502519
EXOC3	0.650855	0.0154372	0.459774	0.92135	Astrocytes	0.502519
TBC1D16	0.724978	0.0176103	0.555897	0.945489	Astrocytes	0.502519
AL136366.1	0.695349	0.0161016	0.517236	0.934796	Astrocytes	0.502519
NR2C1	0.697476	0.0160018	0.520254	0.935067	Astrocytes	0.502519
CHD6	0.720174	0.0162214	0.551062	0.941185	Astrocytes	0.502519
MTMR4	0.678663	0.0179852	0.492256	0.935657	Astrocytes	0.502519
PRKDC	0.726176	0.0163678	0.559227	0.942965	Astrocytes	0.502519
RBL1	0.652524	0.0176246	0.458656	0.928337	Astrocytes	0.502519
AC005670.3	0.656925	0.0158748	0.466891	0.924308	Astrocytes	0.502519
RPAP2	0.72628	0.0166335	0.559013	0.943596	Astrocytes	0.502519
PPHLN1	0.707843	0.0156826	0.534821	0.936841	Astrocytes	0.502519
ING5	0.722064	0.0177869	0.551593	0.94522	Astrocytes	0.502519
HDAC8	0.705935	0.0182392	0.528691	0.942602	Astrocytes	0.502519
GADD45B	1.48554	0.0177424	1.07101	2.06051	Astrocytes	0.502519
NKTR	0.737324	0.0159078	0.575538	0.94459	Astrocytes	0.502519
IGFBP7	1.43507	0.0158535	1.07007	1.92457	Astrocytes	0.502519
ICK	1.44159	0.0175168	1.06609	1.94937	Astrocytes	0.502519
EIF4G3	0.684484	0.0186496	0.499106	0.938715	Astrocytes	0.502519
ILDR2	0.727922	0.0186136	0.558744	0.948323	Astrocytes	0.502519
CDK8	0.675964	0.0174229	0.489467	0.933522	Astrocytes	0.502519
PSMA1	0.697844	0.0184008	0.517438	0.94115	Astrocytes	0.502519
RNF38	0.667819	0.0149762	0.482395	0.924516	Astrocytes	0.502519
BAG3	1.38679	0.0182889	1.05695	1.81955	Astrocytes	0.502519
ATP1A1-AS1	0.642281	0.0156171	0.448593	0.919596	Astrocytes	0.502519
DUSP22	1.44762	0.0173129	1.06746	1.96318	Astrocytes	0.502519
ERCC6L2	0.718122	0.0151487	0.549734	0.938088	Astrocytes	0.502519
PNN	0.666156	0.018382	0.475247	0.933754	Astrocytes	0.502519
CERS5	1.45101	0.0167512	1.06956	1.9685	Astrocytes	0.502519
SON	0.677744	0.0185471	0.490272	0.936902	Astrocytes	0.502519
TUT4	0.715409	0.0152452	0.545848	0.937643	Astrocytes	0.502519
PTPRM	1.44572	0.0183055	1.06438	1.96367	Astrocytes	0.502519
KLF9	1.46692	0.0169913	1.07093	2.00932	Astrocytes	0.502519
HELB	1.43035	0.0155641	1.07027	1.91158	Astrocytes	0.502519
CRY1	1.49025	0.0156643	1.0783	2.05959	Astrocytes	0.502519
MIA3	0.705284	0.0183861	0.527605	0.942799	Astrocytes	0.502519
NT5C2	1.40895	0.0185433	1.05914	1.87429	Astrocytes	0.502519
CCNL2	0.678976	0.016578	0.494655	0.931979	Astrocytes	0.502519
AL590807.1	0.706434	0.0175111	0.530343	0.940991	Astrocytes	0.502519
SPIDR	0.669119	0.0169092	0.481196	0.930432	Astrocytes	0.502519
PPCDC	0.664856	0.0160088	0.476956	0.926779	Astrocytes	0.502519
MYO10	0.726596	0.0166702	0.559406	0.943754	Astrocytes	0.502519
HERC1	0.746173	0.0156001	0.588532	0.946037	Astrocytes	0.502519
SIN3A	1.47007	0.017593	1.06951	2.02065	Astrocytes	0.502519
SH3BGRL	0.708345	0.0169129	0.533778	0.940002	Astrocytes	0.502519
DCBLD2	0.731218	0.0178645	0.564336	0.947449	Astrocytes	0.502519
HERC2	0.712145	0.0166649	0.539344	0.940312	Astrocytes	0.502519
COX11	0.729729	0.0186343	0.561264	0.94876	Astrocytes	0.502519
PPP3CA	1.39369	0.0169731	1.06122	1.83034	Astrocytes	0.502519
TTC17	0.676181	0.0177029	0.489362	0.934322	Astrocytes	0.502519
SHB	1.46698	0.0177244	1.06873	2.01363	Astrocytes	0.502519
ELOA-AS1	0.651102	0.0189665	0.454959	0.931807	Astrocytes	0.508496
RNPC3	0.734664	0.0190188	0.567768	0.95062	Astrocytes	0.508496
YAP1	1.37117	0.0191624	1.05288	1.78569	Astrocytes	0.510355
MFAP3L	1.3614	0.0198128	1.0502	1.76483	Astrocytes	0.513803
SCGB2B2	0.687557	0.020404	0.500949	0.943678	Astrocytes	0.513803
BMPR1B	1.41464	0.0205491	1.05479	1.89727	Astrocytes	0.513803
ZNRF2	1.50965	0.0199551	1.06715	2.13564	Astrocytes	0.513803
PLIN5	0.70242	0.0200225	0.521589	0.945945	Astrocytes	0.513803
SEC61A2	0.653717	0.0201361	0.456753	0.935618	Astrocytes	0.513803
SLC35A1	0.641891	0.0199483	0.441887	0.93242	Astrocytes	0.513803
MSRB3	1.37301	0.0199737	1.05125	1.79327	Astrocytes	0.513803
TIAL1	0.714997	0.0203745	0.538498	0.949347	Astrocytes	0.513803
ERCC6	0.697673	0.0205581	0.514442	0.946165	Astrocytes	0.513803
COPA	1.39951	0.0194332	1.05573	1.85523	Astrocytes	0.513803
ANGEL1	0.69704	0.0204411	0.513726	0.945765	Astrocytes	0.513803
RGCC	0.679878	0.020242	0.490881	0.941643	Astrocytes	0.513803
ETF1	1.45216	0.0199353	1.06068	1.98813	Astrocytes	0.513803
WDR60	0.707049	0.020505	0.527344	0.947992	Astrocytes	0.513803
PEX1	0.701715	0.0203659	0.520196	0.946573	Astrocytes	0.513803
AKAP13	1.36397	0.0200359	1.05002	1.77179	Astrocytes	0.513803
DDX18	0.635007	0.0207077	0.432191	0.932999	Astrocytes	0.51382
AKAP12	1.43727	0.0206509	1.0571	1.95414	Astrocytes	0.51382
DLST	1.41449	0.0207957	1.05417	1.89797	Astrocytes	0.514152
YTHDF1	1.45694	0.0211719	1.05793	2.00644	Astrocytes	0.518573
ERCC5	0.758575	0.0210671	0.599841	0.959312	Astrocytes	0.518573
RYBP	1.3966	0.0212	1.05119	1.85552	Astrocytes	0.518573
CX3CR1	0.517877	0.000385047	0.360125	0.744732	Microglia	0.521893
SYTL4	1.38433	0.0216598	1.04878	1.82725	Astrocytes	0.524704
USP15	0.681363	0.0216788	0.491063	0.945409	Astrocytes	0.524704
SLC7A10	0.685806	0.0215696	0.497148	0.946054	Astrocytes	0.524704
LINC00662	0.704222	0.0218922	0.521786	0.950446	Astrocytes	0.525332
NUS1	0.699853	0.0217837	0.515925	0.94935	Astrocytes	0.525332
PDCD10	1.39686	0.0219333	1.04954	1.85912	Astrocytes	0.525332
AC093157.1	0.695531	0.0224526	0.509237	0.949977	Astrocytes	0.53591
TRAPPC12	0.701276	0.0227846	0.516696	0.951795	Astrocytes	0.53641
STAT3	1.47566	0.0226003	1.05615	2.06179	Astrocytes	0.53641
PTCH1	0.698892	0.0227642	0.513455	0.9513	Astrocytes	0.53641
CROT	0.680813	0.0226408	0.489165	0.947546	Astrocytes	0.53641
DLGAP1	0.69134	0.0229631	0.502946	0.950301	Astrocytes	0.538774
CALU	1.35168	0.0231565	1.04211	1.7532	Astrocytes	0.541469
ARPP21	0.734797	0.0233047	0.563028	0.958969	Astrocytes	0.543093
ME2	0.711155	0.0284457	0.524254	0.964689	Astrocytes	0.546343
PIP4K2A	1.39778	0.0255217	1.04185	1.8753	Astrocytes	0.546343
SMC6	0.752025	0.0271505	0.584027	0.968348	Astrocytes	0.546343
SMAD3	1.41441	0.0259078	1.04253	1.91895	Astrocytes	0.546343
PLAAT3	1.42444	0.0251592	1.04506	1.94154	Astrocytes	0.546343
ARL13B	1.42775	0.0252534	1.04515	1.9504	Astrocytes	0.546343
ARHGEF12	1.44581	0.0270144	1.04279	2.00459	Astrocytes	0.546343
RASA3	1.42964	0.0280825	1.03918	1.96683	Astrocytes	0.546343
SH3YL1	0.712113	0.02698	0.52709	0.962084	Astrocytes	0.546343
HCG18	0.68731	0.0266357	0.493368	0.95749	Astrocytes	0.546343
USP24	0.7199	0.02583	0.539207	0.961145	Astrocytes	0.546343
BRCC3	0.722996	0.0271907	0.542171	0.964128	Astrocytes	0.546343
RYR1	0.716907	0.0266262	0.534168	0.96216	Astrocytes	0.546343
MAP4K4	1.35205	0.0247502	1.03907	1.7593	Astrocytes	0.546343
USP16	0.676503	0.0260516	0.479496	0.954455	Astrocytes	0.546343
PMS1	0.715296	0.0247294	0.533923	0.958281	Astrocytes	0.546343
CCDC171	0.732591	0.026859	0.556165	0.964984	Astrocytes	0.546343
MYO1E	1.35003	0.027344	1.03411	1.76247	Astrocytes	0.546343
ADCYAP1R1	0.725412	0.0271968	0.545591	0.964501	Astrocytes	0.546343
ULK4	1.37337	0.0241912	1.04226	1.80968	Astrocytes	0.546343
GNA14	1.40389	0.0245868	1.0444	1.88713	Astrocytes	0.546343
KIF13A	0.730001	0.0270206	0.5523	0.964877	Astrocytes	0.546343
ANKRD36C	0.730713	0.0275197	0.552817	0.965855	Astrocytes	0.546343
HIPK3	1.38989	0.0273133	1.03753	1.8619	Astrocytes	0.546343
HNRNPC	1.42005	0.0235828	1.0482	1.92381	Astrocytes	0.546343
RIF1	0.711898	0.0260639	0.52775	0.960302	Astrocytes	0.546343
PAG1	1.35796	0.0264581	1.03641	1.77926	Astrocytes	0.546343
BCLAF3	0.768849	0.027809	0.608323	0.971735	Astrocytes	0.546343
NRDE2	0.718134	0.0260289	0.536514	0.961235	Astrocytes	0.546343
BMP7	0.734128	0.0242263	0.561083	0.960543	Astrocytes	0.546343
STEAP2-AS1	0.731899	0.0283263	0.55372	0.967415	Astrocytes	0.546343
IKZF2	1.39398	0.0244408	1.04376	1.86171	Astrocytes	0.546343
FAXDC2	0.711829	0.0237575	0.530158	0.955753	Astrocytes	0.546343
SLC35B4	0.714105	0.0285109	0.528315	0.96523	Astrocytes	0.546343
EVA1C	1.36969	0.0283675	1.03388	1.81457	Astrocytes	0.546343
MGLL	0.719304	0.0270938	0.537057	0.963395	Astrocytes	0.546343
FEM1B	1.41416	0.0259565	1.0424	1.91851	Astrocytes	0.546343
ANKS3	0.690251	0.0278475	0.496067	0.960449	Astrocytes	0.546343
MALT1	0.725558	0.0248609	0.548218	0.960264	Astrocytes	0.546343
LEMD3	1.41789	0.0280682	1.03829	1.93628	Astrocytes	0.546343
MARK1	1.43081	0.0248142	1.04642	1.9564	Astrocytes	0.546343
LINC00299	0.717531	0.0263181	0.535365	0.961682	Astrocytes	0.546343
PARP1	0.717925	0.0254736	0.536807	0.960152	Astrocytes	0.546343
PLEKHB1	0.68367	0.0258879	0.489274	0.955304	Astrocytes	0.546343
CD99	1.43639	0.023849	1.04918	1.9665	Astrocytes	0.546343
C12orf49	1.37835	0.0279233	1.03541	1.83489	Astrocytes	0.546343
MAP3K13	1.37543	0.0278286	1.03535	1.82723	Astrocytes	0.546343
CRMP1	1.34269	0.026529	1.03492	1.74198	Astrocytes	0.546343
TRIM9	0.682041	0.0261496	0.486796	0.955594	Astrocytes	0.546343
ST6GALNAC5	0.717948	0.0284413	0.533785	0.965649	Astrocytes	0.546343
MCTS1	0.732849	0.0253976	0.558025	0.962443	Astrocytes	0.546343
MAPK8	0.715998	0.0244648	0.535192	0.957886	Astrocytes	0.546343
PDE8B	1.36923	0.0267362	1.03689	1.8081	Astrocytes	0.546343
TSC22D1	1.39133	0.0279052	1.03649	1.86765	Astrocytes	0.546343
ZFC3H1	0.753566	0.0257024	0.587696	0.96625	Astrocytes	0.546343
PML	1.41271	0.0270783	1.03991	1.91916	Astrocytes	0.546343
PARP6	0.712888	0.024433	0.530886	0.957286	Astrocytes	0.546343
CDC42SE1	1.3691	0.0282414	1.03406	1.81269	Astrocytes	0.546343
EIF3H	1.47265	0.0264002	1.04642	2.0725	Astrocytes	0.546343
CDK17	1.4294	0.0241668	1.04777	1.95002	Astrocytes	0.546343
XPA	0.703301	0.0236833	0.518447	0.954066	Astrocytes	0.546343
ITFG2	0.705031	0.0266231	0.517621	0.960293	Astrocytes	0.546343
MEG3	0.661302	0.0243224	0.461409	0.947791	Astrocytes	0.546343
USP9Y	76.3427	0.0285131	1.57707	3695.59	Astrocytes	0.546343
RUFY3	1.33641	0.0286992	1.03063	1.73292	Astrocytes	0.548385
ZFP14	0.701568	0.0287873	0.510597	0.963965	Astrocytes	0.548549
SPESP1	0.719093	0.0306208	0.533273	0.969664	Astrocytes	0.548803
MRPS9	0.744469	0.0304295	0.5699	0.972511	Astrocytes	0.548803
ATF2	1.38463	0.0304011	1.03127	1.85906	Astrocytes	0.548803
ZFP30	0.739849	0.0308343	0.562807	0.972585	Astrocytes	0.548803
CYTH1	0.720862	0.0300064	0.536365	0.968821	Astrocytes	0.548803
SPP1	1.3566	0.0293119	1.03116	1.78476	Astrocytes	0.548803
IQCB1	0.750168	0.0294926	0.579099	0.971772	Astrocytes	0.548803
BRWD1	0.743287	0.0304201	0.568186	0.97235	Astrocytes	0.548803
INTS10	1.40577	0.0302147	1.03311	1.91285	Astrocytes	0.548803
PMP22	1.43142	0.0298719	1.0356	1.97855	Astrocytes	0.548803
CAST	1.38228	0.0308692	1.03025	1.85458	Astrocytes	0.548803
NFIA	1.37302	0.029852	1.03143	1.82774	Astrocytes	0.548803
PUS7L	0.72501	0.0297366	0.542514	0.968896	Astrocytes	0.548803
ATP1A2	0.678703	0.0302421	0.478004	0.963669	Astrocytes	0.548803
RADIL	1.44686	0.02969	1.03706	2.01859	Astrocytes	0.548803
CEP192	0.761759	0.0306248	0.595214	0.974905	Astrocytes	0.548803
FAN1	0.705816	0.0292521	0.516009	0.965441	Astrocytes	0.548803
ARL6	0.699136	0.0296267	0.506397	0.965232	Astrocytes	0.548803
NLGN3	0.678827	0.0307407	0.477668	0.964701	Astrocytes	0.548803
VPS13B-DT	0.712442	0.0308377	0.523698	0.969209	Astrocytes	0.548803
MSH2	0.74565	0.0306314	0.571439	0.972971	Astrocytes	0.548803
ZBTB7A	0.669349	0.0306617	0.465108	0.963278	Astrocytes	0.548803
HNRNPDL	0.700513	0.0294957	0.508427	0.965171	Astrocytes	0.548803
SLC25A18	0.721186	0.0291339	0.537673	0.967335	Astrocytes	0.548803
SPICE1	0.707778	0.0301044	0.517893	0.967285	Astrocytes	0.548803
RTCA-AS1	0.739991	0.029647	0.564115	0.9707	Astrocytes	0.548803
DIDO1	0.757324	0.031046	0.588251	0.974992	Astrocytes	0.550528
MASP1	1.35368	0.0312541	1.02763	1.78319	Astrocytes	0.552797
R3HDM1	0.755242	0.0313524	0.584896	0.975199	Astrocytes	0.553117
GCLM	1.29076	0.0326009	1.02136	1.63122	Astrocytes	0.559816
EHMT1	0.742743	0.0322808	0.565707	0.975181	Astrocytes	0.559816
ERCC8	0.756842	0.032544	0.586228	0.977111	Astrocytes	0.559816
GATAD2A	1.3993	0.0325907	1.02823	1.90428	Astrocytes	0.559816
LAMTOR5-AS1	0.713622	0.0320671	0.524186	0.971519	Astrocytes	0.559816
EML4	0.750693	0.0326104	0.577074	0.976547	Astrocytes	0.559816
PDSS1	0.718234	0.0319848	0.530767	0.971914	Astrocytes	0.559816
ARHGEF40	0.72655	0.0326248	0.542004	0.973932	Astrocytes	0.559816
BBS4	1.42619	0.032061	1.03088	1.9731	Astrocytes	0.559816
AIFM3	0.649345	0.0318565	0.437745	0.963231	Astrocytes	0.559816
LUZP1	0.716707	0.0324176	0.528205	0.97248	Astrocytes	0.559816
FNIP2	0.677691	0.0329396	0.473974	0.968967	Astrocytes	0.561377
APCDD1	0.744031	0.03296	0.566986	0.976358	Astrocytes	0.561377
OSGEP	0.723893	0.0328872	0.537969	0.974072	Astrocytes	0.561377
SGPL1	1.35565	0.0330785	1.02473	1.79343	Astrocytes	0.562009
ALDH1L1	1.42151	0.0332144	1.02839	1.9649	Astrocytes	0.56293
BTBD7	0.719695	0.0333264	0.531597	0.974348	Astrocytes	0.563444
NADSYN1	0.748033	0.0336481	0.572256	0.977801	Astrocytes	0.566199
HIPK1	1.33424	0.0336976	1.02247	1.74107	Astrocytes	0.566199
NOCT	1.35812	0.0337758	1.02374	1.8017	Astrocytes	0.566199
BMPR1A	1.41996	0.0338176	1.02717	1.96295	Astrocytes	0.566199
LSM6	1.47596	0.0350029	1.02777	2.1196	Astrocytes	0.56817
LRRIQ1	1.34143	0.0342218	1.02208	1.76055	Astrocytes	0.56817
CACHD1	1.35316	0.0345858	1.02216	1.79133	Astrocytes	0.56817
GOLGA1	0.732992	0.0348373	0.549292	0.978127	Astrocytes	0.56817
TMEM63A	0.697487	0.0344915	0.499447	0.974054	Astrocytes	0.56817
DHX29	0.697898	0.0342056	0.500278	0.97358	Astrocytes	0.56817
SCD5	0.716403	0.0349111	0.5255	0.976657	Astrocytes	0.56817
AL122014.1	0.746081	0.0348287	0.568375	0.979348	Astrocytes	0.56817
GNS	1.41949	0.0346015	1.02569	1.96449	Astrocytes	0.56817
HLCS	0.723403	0.0344644	0.535847	0.976606	Astrocytes	0.56817
FXN	0.721319	0.0344189	0.532918	0.976326	Astrocytes	0.56817
EFCAB2	0.713763	0.0350061	0.521684	0.976562	Astrocytes	0.56817
ZFP36L2	1.39245	0.0348931	1.02375	1.89393	Astrocytes	0.56817
CSGALNACT2	1.32537	0.0352275	1.01969	1.7227	Astrocytes	0.569085
TUBGCP5	0.750347	0.0351981	0.574349	0.980276	Astrocytes	0.569085
FOXK1	1.39056	0.0354711	1.02266	1.89081	Astrocytes	0.571092
AMN1	0.743565	0.0355173	0.564098	0.98013	Astrocytes	0.571092
PRR12	0.576711	0.000835237	0.417559	0.796524	Microglia	0.574331
AC126177.3	0.594906	0.000932218	0.43742	0.809093	Microglia	0.574331
PTPN12	1.76673	0.000573548	1.2779	2.44256	Microglia	0.574331
STAT5A	1.78231	0.000785119	1.272	2.49734	Microglia	0.574331
ACBD5	0.561098	0.000835569	0.399761	0.787548	Microglia	0.574331
TSC22D4	1.70848	0.000855984	1.24699	2.34076	Microglia	0.574331
SAMD4A	1.40249	0.0359498	1.02242	1.92383	Astrocytes	0.576701
CCDC6	1.33693	0.0363557	1.01861	1.75473	Astrocytes	0.580495
WWOX	0.712784	0.0364388	0.519031	0.978864	Astrocytes	0.580495
COMMD10	0.733946	0.0363356	0.54938	0.980516	Astrocytes	0.580495
PLAA	1.47024	0.0365626	1.02437	2.11018	Astrocytes	0.581126
EGFR	0.734628	0.0379607	0.549003	0.983015	Astrocytes	0.583191
SLC24A3	0.750311	0.0377208	0.572216	0.983836	Astrocytes	0.583191
TTC13	0.706126	0.0378482	0.508443	0.980668	Astrocytes	0.583191
OSMR-AS1	1.35766	0.0372081	1.01829	1.81013	Astrocytes	0.583191
SLC6A1	0.707122	0.0373295	0.510291	0.979876	Astrocytes	0.583191
SRFBP1	0.761815	0.0375278	0.58954	0.98443	Astrocytes	0.583191
SLC12A6	0.741693	0.037813	0.559437	0.983325	Astrocytes	0.583191
VCPIP1	1.33696	0.0369367	1.01776	1.75628	Astrocytes	0.583191
AMD1	1.35624	0.0379436	1.0171	1.80846	Astrocytes	0.583191
DHTKD1	0.717271	0.037771	0.524226	0.981406	Astrocytes	0.583191
GNA12	1.37173	0.0372578	1.01883	1.84686	Astrocytes	0.583191
TAB1	0.7013	0.0374661	0.502046	0.979636	Astrocytes	0.583191
KHDRBS1	1.41028	0.0373218	1.02039	1.94915	Astrocytes	0.583191
EIF1B-AS1	0.734099	0.0369084	0.549118	0.981396	Astrocytes	0.583191
MAP3K5	1.35593	0.0377109	1.01744	1.80702	Astrocytes	0.583191
NUMA1	0.748646	0.0383895	0.56921	0.984647	Astrocytes	0.588469
GPCPD1	1.36035	0.0385796	1.01629	1.82088	Astrocytes	0.590071
SIL1	0.725913	0.0388227	0.535687	0.983691	Astrocytes	0.591167
COL5A3	0.691133	0.0387627	0.486863	0.981109	Astrocytes	0.591167
FAT3	1.34039	0.0390683	1.0148	1.77044	Astrocytes	0.593597
UGGT1	0.712356	0.0391867	0.516054	0.983328	Astrocytes	0.594088
HES6	0.687681	0.0393082	0.481658	0.981827	Astrocytes	0.594623
SP1	1.37141	0.0395685	1.01519	1.85262	Astrocytes	0.595609
AC079385.1	1.55721	0.0398746	1.0207	2.37574	Astrocytes	0.595609
AC104806.2	0.718311	0.0398502	0.523946	0.984776	Astrocytes	0.595609
SCML1	1.44541	0.0398689	1.01719	2.0539	Astrocytes	0.595609
KALRN	1.3567	0.0396464	1.01455	1.81423	Astrocytes	0.595609
REST	0.714089	0.0398915	0.517913	0.984573	Astrocytes	0.595609
SPAST	0.694835	0.0399981	0.490889	0.983515	Astrocytes	0.595911
TAZ	0.731042	0.0406405	0.5416	0.986747	Astrocytes	0.597501
SERPING1	1.3412	0.040971	1.01211	1.7773	Astrocytes	0.597501
TCHP	0.728673	0.0402279	0.538506	0.985996	Astrocytes	0.597501
PCF11	0.724535	0.0409643	0.53194	0.986861	Astrocytes	0.597501
TASOR	0.735125	0.0405638	0.547599	0.98687	Astrocytes	0.597501
CHST7	0.696036	0.0406196	0.492017	0.984652	Astrocytes	0.597501
MSN	1.3212	0.0405315	1.01208	1.72473	Astrocytes	0.597501
UBE2O	0.744655	0.0408066	0.561386	0.987753	Astrocytes	0.597501
TPCN1	0.721971	0.0408151	0.528381	0.98649	Astrocytes	0.597501
GOLGB1	0.75008	0.0407415	0.569474	0.987965	Astrocytes	0.597501
PGM3	1.34081	0.0413334	1.01159	1.77716	Astrocytes	0.601514
HEPH	0.71465	0.0422384	0.516771	0.988298	Astrocytes	0.603657
SEPTIN10	1.33953	0.0417478	1.01097	1.77486	Astrocytes	0.603657
PRPF38B	0.71507	0.0421826	0.517414	0.988232	Astrocytes	0.603657
JUN	1.34278	0.0418044	1.01099	1.78346	Astrocytes	0.603657
CREM	1.30847	0.0422682	1.00943	1.69612	Astrocytes	0.603657
CCDC80	1.30819	0.0421074	1.00962	1.69505	Astrocytes	0.603657
WAC-AS1	0.754329	0.0422495	0.574653	0.990186	Astrocytes	0.603657
BAZ1A	0.738839	0.04207	0.551835	0.989215	Astrocytes	0.603657
PDPR	0.741984	0.0422212	0.55634	0.989575	Astrocytes	0.603657
ACOX1	1.44982	0.0426948	1.0123	2.07645	Astrocytes	0.605985
GALC	0.743342	0.0425478	0.55809	0.990087	Astrocytes	0.605985
RALGPS1	0.719768	0.0426485	0.523738	0.989169	Astrocytes	0.605985
RIDA	0.735993	0.0435042	0.546547	0.991106	Astrocytes	0.607176
CCNT1	1.34076	0.0444722	1.00727	1.78466	Astrocytes	0.607176
AFF1	1.3563	0.0445392	1.00746	1.82592	Astrocytes	0.607176
WHAMM	0.759488	0.0438845	0.581184	0.992493	Astrocytes	0.607176
C3orf70	1.34655	0.0440543	1.00795	1.79891	Astrocytes	0.607176
GRAMD4	0.727639	0.0428998	0.534864	0.989894	Astrocytes	0.607176
VGLL4	1.38013	0.0444005	1.00809	1.88948	Astrocytes	0.607176
AC011416.4	0.723523	0.0431396	0.528735	0.990071	Astrocytes	0.607176
KANSL3	0.772689	0.0433367	0.601672	0.992314	Astrocytes	0.607176
CNN3	1.3218	0.0444441	1.00695	1.73511	Astrocytes	0.607176
SERP1	0.740779	0.0443487	0.552928	0.992451	Astrocytes	0.607176
NT5E	0.726908	0.0443781	0.532645	0.99202	Astrocytes	0.607176
VTI1B	0.757565	0.0432099	0.578787	0.991566	Astrocytes	0.607176
VEZF1	1.2969	0.043976	1.00704	1.6702	Astrocytes	0.607176
TMEM184C	0.733748	0.0437752	0.543056	0.991402	Astrocytes	0.607176
ARIH1	1.34822	0.0440769	1.00795	1.80336	Astrocytes	0.607176
PWWP3A	0.715005	0.0438649	0.515966	0.990824	Astrocytes	0.607176
CTTNBP2NL	1.35443	0.0434145	1.00901	1.8181	Astrocytes	0.607176
FAM98B	0.699739	0.043266	0.494951	0.989258	Astrocytes	0.607176
AKAP9	0.760292	0.0436555	0.582568	0.992235	Astrocytes	0.607176
LINC00342	0.716281	0.044646	0.517165	0.992059	Astrocytes	0.607433
LPIN2	0.754655	0.0450509	0.573049	0.993814	Astrocytes	0.610533
VPS45	0.75043	0.0450301	0.566735	0.993664	Astrocytes	0.610533
PIK3R1	0.730807	0.045284	0.537605	0.993441	Astrocytes	0.61237
KLHL23	0.745355	0.0454974	0.558831	0.994136	Astrocytes	0.61237
CSPG5	0.74946	0.0455747	0.564885	0.994345	Astrocytes	0.61237
LRRN3	0.744915	0.0454009	0.55825	0.993996	Astrocytes	0.61237
FAM126A	1.28511	0.0456303	1.00488	1.64349	Astrocytes	0.61237
LINC00513	1.55317	0.0458055	1.00823	2.39266	Astrocytes	0.613139
SIN3B	0.725637	0.0460428	0.52952	0.994389	Astrocytes	0.613139
POU2F1	0.734941	0.0462177	0.542932	0.994853	Astrocytes	0.613139
TIMP2	1.33415	0.0460518	1.00506	1.77099	Astrocytes	0.613139
TSC22D2	1.39441	0.0463058	1.00545	1.93384	Astrocytes	0.613139
OSTM1	0.736861	0.0461231	0.54582	0.994767	Astrocytes	0.613139
NDUFV3	0.752412	0.0463099	0.568761	0.995363	Astrocytes	0.613139
KLF7	1.34055	0.0473308	1.00345	1.79089	Astrocytes	0.614052
RAB11A	1.44911	0.0472082	1.00458	2.09036	Astrocytes	0.614052
AC093305.1	1.41695	0.0468339	1.00489	1.99799	Astrocytes	0.614052
HECTD4	0.710457	0.047358	0.506762	0.996029	Astrocytes	0.614052
ALKBH1	0.759572	0.0472142	0.578902	0.996628	Astrocytes	0.614052
B3GLCT	0.740279	0.0466357	0.55047	0.995537	Astrocytes	0.614052
SPEN	0.734684	0.0470765	0.541911	0.996031	Astrocytes	0.614052
PTPN4	0.753956	0.0470915	0.570514	0.996383	Astrocytes	0.614052
CRY2	1.44894	0.0470383	1.00486	2.08927	Astrocytes	0.614052
ZFYVE28	1.31556	0.0466774	1.00404	1.72375	Astrocytes	0.614052
DENR	0.725716	0.0469014	0.528979	0.995623	Astrocytes	0.614052
NOD1	1.31635	0.0475367	1.00299	1.72763	Astrocytes	0.61448
TTYH1	0.718171	0.0475692	0.517599	0.996464	Astrocytes	0.61448
ETV6	1.34617	0.0477261	1.00298	1.80681	Astrocytes	0.614735
NSMAF	0.76935	0.0477672	0.593425	0.997429	Astrocytes	0.614735
ZHX1	0.721917	0.0479544	0.522693	0.997076	Astrocytes	0.61485
MED23	0.681154	0.0479357	0.465589	0.996524	Astrocytes	0.61485
PCNT	0.748225	0.048104	0.561193	0.997589	Astrocytes	0.615624
FGD6	0.73413	0.0490825	0.539614	0.998764	Astrocytes	0.619362
TAOK3	0.727073	0.0488594	0.529475	0.998413	Astrocytes	0.619362
DOP1A	0.759515	0.0490492	0.577522	0.99886	Astrocytes	0.619362
LRRC27	0.723666	0.0488564	0.524539	0.998385	Astrocytes	0.619362
AP4E1	0.727752	0.0489326	0.530409	0.99852	Astrocytes	0.619362
DLGAP2	0.771104	0.0487814	0.595425	0.998616	Astrocytes	0.619362
DEK	0.756918	0.0486576	0.573862	0.998366	Astrocytes	0.619362
EPHX2	0.744562	0.0491144	0.555005	0.998862	Astrocytes	0.619362
SYK	0.59796	0.00109673	0.439122	0.814253	Microglia	0.619379
PIK3IP1	1.34676	0.0492215	1.00101	1.81192	Astrocytes	0.61958
APPL2	0.755213	0.0499702	0.570364	0.999969	Astrocytes	0.621953
PGM1	0.730212	0.0499379	0.533252	0.999921	Astrocytes	0.621953
CAMKMT	0.744837	0.0495914	0.555071	0.999479	Astrocytes	0.621953
UGGT2	0.765847	0.0501024	0.586449	1.00012	Astrocytes	0.621953
MALSU1	1.31846	0.0497927	1.00025	1.7379	Astrocytes	0.621953
STAMBPL1	1.3339	0.0498321	1.00021	1.77893	Astrocytes	0.621953
BLZF1	0.709439	0.0501313	0.503202	1.0002	Astrocytes	0.621953
MPHOSPH9	0.739373	0.0499678	0.546693	0.999963	Astrocytes	0.621953
TSPAN5	1.3414	0.0502915	0.999621	1.80002	Astrocytes	0.622821
KMT5A	0.783958	0.0507267	0.614114	1.00077	Astrocytes	0.623971
FSTL1	1.35379	0.0507161	0.999051	1.8345	Astrocytes	0.623971
PTCD2	0.722835	0.0507462	0.521937	1.00106	Astrocytes	0.623971
ERBIN	1.27988	0.0505716	0.999381	1.63911	Astrocytes	0.623971
MFSD4B	1.42357	0.0508834	0.998637	2.02931	Astrocytes	0.624544
USP10	0.769233	0.0521236	0.590291	1.00242	Astrocytes	0.630787
COPS4	0.72155	0.0518915	0.519241	1.00268	Astrocytes	0.630787
SNRNP70	0.687521	0.0520656	0.471101	1.00336	Astrocytes	0.630787
ZHX3	0.723338	0.052027	0.521729	1.00285	Astrocytes	0.630787
GALNT16	1.31613	0.0518077	0.997845	1.73595	Astrocytes	0.630787
ARSB	0.750875	0.0518962	0.562485	1.00236	Astrocytes	0.630787
FAM20B	0.684971	0.0517085	0.467869	1.00281	Astrocytes	0.630787
GBF1	1.32175	0.0518965	0.997705	1.75104	Astrocytes	0.630787
WLS	1.31925	0.0522559	0.997294	1.74514	Astrocytes	0.631281
STX16	0.724077	0.0524629	0.522486	1.00345	Astrocytes	0.631444
HNRNPLL	1.31204	0.0526442	0.996898	1.7268	Astrocytes	0.631444
CTNNB1	1.32317	0.0529071	0.996488	1.75695	Astrocytes	0.631444
OPA1	0.735368	0.0524628	0.538997	1.00328	Astrocytes	0.631444
DISP1	0.72532	0.0526485	0.524157	1.00369	Astrocytes	0.631444
AC139887.2	0.711872	0.0528346	0.504655	1.00417	Astrocytes	0.631444
ZYG11B	0.748934	0.0529102	0.558867	1.00364	Astrocytes	0.631444
ATP10D	0.599081	0.00140248	0.437468	0.8204	Microglia	0.633789
METTL25	0.608873	0.00140142	0.449073	0.825538	Microglia	0.633789
PRTFDC1	0.578877	0.00149633	0.413089	0.811202	Microglia	0.633789
DAAM1	0.626245	0.00148804	0.46919	0.835871	Microglia	0.633789
TRAK2	0.711262	0.0532823	0.503458	1.00484	Astrocytes	0.634787
LARP1	0.7415	0.0534145	0.547406	1.00441	Astrocytes	0.635264
ZNF81	0.749045	0.0629152	0.552401	1.01569	Astrocytes	0.636206
WASHC5	0.726953	0.0589634	0.522116	1.01215	Astrocytes	0.636206
MED1	0.782132	0.0589273	0.606085	1.00931	Astrocytes	0.636206
TAF8	0.761858	0.0625023	0.57224	1.01431	Astrocytes	0.636206
GIGYF1	0.768231	0.0624862	0.582117	1.01385	Astrocytes	0.636206
KLHDC2	0.760791	0.0628274	0.570394	1.01474	Astrocytes	0.636206
TEF	0.732447	0.0560539	0.532178	1.00808	Astrocytes	0.636206
WBP4	0.766369	0.0609627	0.580172	1.01232	Astrocytes	0.636206
DOP1B	0.763304	0.0563059	0.578415	1.00729	Astrocytes	0.636206
AC006148.1	0.755029	0.0547907	0.566786	1.00579	Astrocytes	0.636206
FBXO22	0.764205	0.0573749	0.579108	1.00846	Astrocytes	0.636206
SEC31B	0.634721	0.0598367	0.395351	1.01902	Astrocytes	0.636206
GRK3	0.740702	0.0625699	0.540062	1.01588	Astrocytes	0.636206
LRRN1	0.76114	0.0562678	0.575121	1.00732	Astrocytes	0.636206
KCNN2	0.726215	0.0598931	0.520403	1.01342	Astrocytes	0.636206
INPP5F	1.31356	0.0544256	0.994828	1.7344	Astrocytes	0.636206
UBQLN1	1.33864	0.0621022	0.985345	1.81862	Astrocytes	0.636206
AP002026.1	1.27556	0.0562641	0.993517	1.63767	Astrocytes	0.636206
FN1	1.28839	0.0588826	0.990531	1.67581	Astrocytes	0.636206
DZANK1	1.3254	0.054573	0.994484	1.76642	Astrocytes	0.636206
AP3S2	0.737339	0.0543452	0.540585	1.00571	Astrocytes	0.636206
SEMA6D	1.3116	0.0559956	0.993079	1.73227	Astrocytes	0.636206
SUGP2	0.722083	0.0540748	0.518437	1.00572	Astrocytes	0.636206
GPR39	0.761927	0.0599343	0.573964	1.01144	Astrocytes	0.636206
TRIM66	0.756916	0.0593401	0.566667	1.01104	Astrocytes	0.636206
ARGLU1	0.756202	0.0561325	0.567674	1.00734	Astrocytes	0.636206
RLIM	1.35761	0.0561162	0.99205	1.85788	Astrocytes	0.636206
CDC14B	1.36364	0.0561145	0.991938	1.87462	Astrocytes	0.636206
ELMOD1	1.31214	0.0604368	0.988148	1.74235	Astrocytes	0.636206
CFAP69	0.787674	0.0627024	0.612628	1.01274	Astrocytes	0.636206
TPR	0.783197	0.060888	0.606583	1.01124	Astrocytes	0.636206
STAU2	0.739369	0.0596239	0.540009	1.01233	Astrocytes	0.636206
CHFR	0.735365	0.0581766	0.535034	1.01071	Astrocytes	0.636206
CEP104	0.734729	0.061823	0.531654	1.01537	Astrocytes	0.636206
SMAD1	1.28732	0.0625359	0.986862	1.67925	Astrocytes	0.636206
CCND2-AS1	1.33091	0.0562961	0.992352	1.78499	Astrocytes	0.636206
DHRS4-AS1	0.71889	0.0584344	0.510748	1.01186	Astrocytes	0.636206
KCMF1	1.33346	0.0617967	0.985887	1.80358	Astrocytes	0.636206
FRMPD4	0.77809	0.054129	0.602732	1.00447	Astrocytes	0.636206
CEP57	0.724919	0.0600427	0.518407	1.0137	Astrocytes	0.636206
TTC19	1.30826	0.057423	0.991562	1.72612	Astrocytes	0.636206
LRCH2	1.30483	0.0570994	0.991998	1.71632	Astrocytes	0.636206
ITGA6	1.35877	0.0544207	0.994195	1.85702	Astrocytes	0.636206
TP53BP2	1.35895	0.0588976	0.988531	1.86816	Astrocytes	0.636206
PLEKHA1	1.33648	0.0602691	0.987546	1.80871	Astrocytes	0.636206
BCL7C	0.743761	0.0611339	0.545583	1.01393	Astrocytes	0.636206
PDE9A	0.753523	0.0580933	0.562311	1.00976	Astrocytes	0.636206
CADPS	1.26971	0.0576172	0.992307	1.62465	Astrocytes	0.636206
AZIN1	1.29358	0.0628623	0.98628	1.69662	Astrocytes	0.636206
ACBD5	0.74285	0.0545762	0.548613	1.00586	Astrocytes	0.636206
RIN2	1.32759	0.0573388	0.991201	1.77815	Astrocytes	0.636206
CHKA	0.784592	0.0629934	0.607545	1.01323	Astrocytes	0.636206
ATP8B2	0.753426	0.0626283	0.559239	1.01504	Astrocytes	0.636206
TMED10	1.3008	0.0597595	0.989241	1.71049	Astrocytes	0.636206
FBXL17	0.751598	0.0577602	0.559613	1.00945	Astrocytes	0.636206
TDRD3	0.768932	0.060448	0.584471	1.01161	Astrocytes	0.636206
ITFG1	0.764221	0.0563883	0.579771	1.00735	Astrocytes	0.636206
ANAPC7	0.736338	0.0620937	0.533864	1.0156	Astrocytes	0.636206
RALGAPB	0.749352	0.0566068	0.556985	1.00816	Astrocytes	0.636206
CPM	0.756335	0.06288	0.563521	1.01512	Astrocytes	0.636206
ACTN1	1.29631	0.0590373	0.99014	1.69715	Astrocytes	0.636206
PHLDB1	1.34018	0.0575226	0.990689	1.81297	Astrocytes	0.636206
NEDD4	1.34703	0.062793	0.98422	1.84359	Astrocytes	0.636206
LINC00391	0.751989	0.060408	0.558476	1.01255	Astrocytes	0.636206
STAM	1.33835	0.056888	0.991491	1.80656	Astrocytes	0.636206
CDYL	1.3376	0.0551866	0.993559	1.80078	Astrocytes	0.636206
CRTAP	0.740813	0.0565111	0.544254	1.00836	Astrocytes	0.636206
UTP20	0.799698	0.0621204	0.632312	1.0114	Astrocytes	0.636206
PCDH10	0.756934	0.0558904	0.568949	1.00703	Astrocytes	0.636206
TMCC2	1.31479	0.0553716	0.993727	1.73958	Astrocytes	0.636206
MTG1	0.74429	0.0566567	0.549347	1.00841	Astrocytes	0.636206
DSE	0.735331	0.0536006	0.538138	1.00478	Astrocytes	0.636206
ZNF69	0.763914	0.0619028	0.575787	1.01351	Astrocytes	0.636206
POLR1A	0.74485	0.0577184	0.549474	1.0097	Astrocytes	0.636206
FOS	1.29485	0.0578662	0.991415	1.69115	Astrocytes	0.636206
MRAS	0.760341	0.0615706	0.57049	1.01337	Astrocytes	0.636206
AMOTL1	1.28845	0.0600313	0.989352	1.67796	Astrocytes	0.636206
BRINP2	0.763999	0.0604712	0.576817	1.01192	Astrocytes	0.636206
EHBP1	0.735434	0.0587632	0.534739	1.01145	Astrocytes	0.636206
PYGB	0.757697	0.0586584	0.5683	1.01022	Astrocytes	0.636206
KIF1B	0.744061	0.0590605	0.547398	1.01138	Astrocytes	0.636206
CEP128	1.34606	0.0582908	0.989618	1.83087	Astrocytes	0.636206
FNDC3B	1.28658	0.0605348	0.988902	1.67385	Astrocytes	0.636206
NFIX	0.741851	0.059963	0.54349	1.01261	Astrocytes	0.636206
KCNA2	0.735885	0.0538382	0.538789	1.00508	Astrocytes	0.636206
CHMP3	0.766373	0.0582059	0.581918	1.00929	Astrocytes	0.636206
FIGN	1.29808	0.0629808	0.985974	1.70898	Astrocytes	0.636206
WDR47	0.715294	0.0573273	0.506335	1.01049	Astrocytes	0.636206
FIG4	0.715933	0.061394	0.504443	1.01609	Astrocytes	0.636206
TMEM108	0.770649	0.056405	0.58969	1.00714	Astrocytes	0.636206
TNK2	0.742316	0.0615267	0.543159	1.0145	Astrocytes	0.636206
ACSS2	1.27287	0.0563817	0.993455	1.63087	Astrocytes	0.636206
PER2	1.29021	0.0539271	0.995702	1.67183	Astrocytes	0.636206
AADAT	0.765594	0.0561631	0.582031	1.00705	Astrocytes	0.636206
MPHOSPH8	0.765929	0.0606269	0.579702	1.01198	Astrocytes	0.636206
ZNF444	0.73563	0.0608575	0.533629	1.0141	Astrocytes	0.636206
KLHDC10	0.733362	0.0624528	0.529211	1.01627	Astrocytes	0.636206
ZC3H8	0.779784	0.0583119	0.602761	1.0088	Astrocytes	0.636206
RFTN2	0.767312	0.0580489	0.583471	1.00908	Astrocytes	0.636206
TMEM254	0.747859	0.0595359	0.552795	1.01175	Astrocytes	0.636206
ZMIZ2	0.749861	0.0591365	0.55608	1.01117	Astrocytes	0.636206
FGGY	0.779293	0.0543344	0.604483	1.00466	Astrocytes	0.636206
FAM76B	0.773759	0.0564554	0.594492	1.00708	Astrocytes	0.636206
AOPEP	1.27396	0.0637666	0.986226	1.64564	Astrocytes	0.637409
WDR33	0.759976	0.064122	0.568333	1.01624	Astrocytes	0.637409
ANKRD36B	0.777326	0.0640053	0.595438	1.01478	Astrocytes	0.637409
AMPH	0.767046	0.0634922	0.579658	1.01501	Astrocytes	0.637409
ZNF782	0.726838	0.0635299	0.518882	1.01814	Astrocytes	0.637409
ZFP91	1.30773	0.0639577	0.984548	1.737	Astrocytes	0.637409
SNX6	0.754302	0.0638303	0.559815	1.01636	Astrocytes	0.637409
CDK18	0.757762	0.0643663	0.564777	1.01669	Astrocytes	0.637409
MYH9	1.35278	0.063258	0.983443	1.86082	Astrocytes	0.637409
AC006115.2	0.740612	0.0644045	0.538742	1.01813	Astrocytes	0.637409
TXNRD1	1.26579	0.0647081	0.985719	1.62545	Astrocytes	0.637409
ANAPC5	0.735765	0.0645097	0.531435	1.01866	Astrocytes	0.637409
SSPN	0.757297	0.0647634	0.563817	1.01717	Astrocytes	0.637409
UBE2W	1.33745	0.0635164	0.983767	1.8183	Astrocytes	0.637409
AC040934.1	0.751563	0.0646009	0.555155	1.01746	Astrocytes	0.637409
SNTG1	0.776702	0.0637539	0.594603	1.01457	Astrocytes	0.637409
CD82	1.32816	0.0643515	0.983225	1.79412	Astrocytes	0.637409
SCP2	0.766792	0.0647758	0.578477	1.01641	Astrocytes	0.637409
PDE4DIP	0.75988	0.06501	0.567636	1.01723	Astrocytes	0.6379
EXOG	0.771757	0.0650107	0.586084	1.01625	Astrocytes	0.6379
MPPE1	0.729671	0.0654598	0.521789	1.02038	Astrocytes	0.638366
ACOT7	1.28328	0.0684823	0.98126	1.67826	Astrocytes	0.638366
KCNIP4	0.79857	0.0683058	0.627023	1.01705	Astrocytes	0.638366
RGS3	0.769447	0.0675515	0.580949	1.01911	Astrocytes	0.638366
FAM120A	0.738222	0.066589	0.533767	1.02099	Astrocytes	0.638366
UBXN2A	0.724978	0.0652407	0.515028	1.02051	Astrocytes	0.638366
MFN1	0.764081	0.0680162	0.572304	1.02012	Astrocytes	0.638366
TMOD2	0.776112	0.0684786	0.590883	1.01941	Astrocytes	0.638366
CPEB2	1.25543	0.0676869	0.983588	1.6024	Astrocytes	0.638366
ATXN7L1	1.31426	0.067101	0.980931	1.76086	Astrocytes	0.638366
TRPV3	0.758354	0.0652598	0.565133	1.01764	Astrocytes	0.638366
ANXA11	1.26019	0.0674345	0.983541	1.61467	Astrocytes	0.638366
GFOD1	0.758453	0.0673804	0.563984	1.01998	Astrocytes	0.638366
KIF2A	0.786301	0.0663765	0.608301	1.01639	Astrocytes	0.638366
DPYSL2	1.33751	0.06587	0.981098	1.82341	Astrocytes	0.638366
KCTD15	0.728663	0.0658221	0.520066	1.02093	Astrocytes	0.638366
HSPA12A	1.38958	0.0660122	0.978463	1.97343	Astrocytes	0.638366
ATRNL1	0.776609	0.0664763	0.59284	1.01734	Astrocytes	0.638366
DDX52	0.746554	0.0655145	0.546979	1.01895	Astrocytes	0.638366
PRKCA-AS1	1.50088	0.0684265	0.969757	2.32291	Astrocytes	0.638366
FAM167A	0.768508	0.0676305	0.579432	1.01928	Astrocytes	0.638366
MEGF10	0.768079	0.0664109	0.579494	1.01804	Astrocytes	0.638366
MAN1C1	1.28404	0.0679046	0.981768	1.67938	Astrocytes	0.638366
CYP4V2	0.771034	0.0684002	0.582931	1.01983	Astrocytes	0.638366
MOK	0.767397	0.0670147	0.578068	1.01874	Astrocytes	0.638366
CCDC88A	0.761289	0.0656736	0.569401	1.01784	Astrocytes	0.638366
CCAR1	0.775991	0.0659066	0.592202	1.01682	Astrocytes	0.638366
TPST1	1.30049	0.0677985	0.980956	1.72411	Astrocytes	0.638366
AC104123.1	1.30848	0.067354	0.980974	1.74532	Astrocytes	0.638366
CIPC	0.718671	0.0679493	0.504053	1.02467	Astrocytes	0.638366
HOPX	1.29388	0.0664585	0.982649	1.70369	Astrocytes	0.638366
RMDN3	0.774914	0.0684797	0.58899	1.01953	Astrocytes	0.638366
PLSCR1	1.33188	0.0668083	0.980333	1.80949	Astrocytes	0.638366
TANC1	1.32468	0.0668664	0.980639	1.78941	Astrocytes	0.638366
WWTR1	1.30916	0.0660983	0.982241	1.74489	Astrocytes	0.638366
IFFO2	1.33119	0.0680557	0.979001	1.81006	Astrocytes	0.638366
SERPINA3	1.28188	0.0670275	0.982727	1.67209	Astrocytes	0.638366
KRIT1	0.774813	0.0699068	0.588001	1.02098	Astrocytes	0.639148
FLOT1	1.27656	0.0700193	0.980224	1.66248	Astrocytes	0.639148
FAM189A2	1.31238	0.0697703	0.978263	1.76061	Astrocytes	0.639148
UPF3A	0.712311	0.0692978	0.493968	1.02717	Astrocytes	0.639148
LONRF1	1.27703	0.0700938	0.980125	1.66388	Astrocytes	0.639148
ZFAND5	1.30089	0.0702341	0.978498	1.72949	Astrocytes	0.639148
RARB	0.769836	0.0695077	0.5804	1.0211	Astrocytes	0.639148
ILF3	0.752785	0.0686611	0.5545	1.02197	Astrocytes	0.639148
CSNK1E	0.767438	0.0699628	0.576379	1.02183	Astrocytes	0.639148
TACC1	1.33144	0.0695847	0.977325	1.81385	Astrocytes	0.639148
PLCH1	0.760247	0.0690277	0.565754	1.0216	Astrocytes	0.639148
UBAP1	1.3736	0.0697991	0.974629	1.9359	Astrocytes	0.639148
HPS3	0.774387	0.0700677	0.587234	1.02119	Astrocytes	0.639148
ATXN1	1.3173	0.0700967	0.977627	1.77499	Astrocytes	0.639148
NRSN2-AS1	0.757952	0.0695579	0.561892	1.02242	Astrocytes	0.639148
AC242426.2	0.759163	0.0702034	0.563373	1.023	Astrocytes	0.639148
AMY2B	0.75511	0.0690422	0.557831	1.02216	Astrocytes	0.639148
NCKAP1	1.31024	0.0689878	0.979194	1.7532	Astrocytes	0.639148
LRRN2	0.767991	0.0704305	0.576968	1.02226	Astrocytes	0.639249
TMEM161B-AS1	0.768251	0.0703405	0.577429	1.02214	Astrocytes	0.639249
TM9SF4	0.747896	0.0711915	0.545496	1.02539	Astrocytes	0.639609
CCNL1	1.37726	0.0709117	0.973082	1.94931	Astrocytes	0.639609
NCAN	0.745958	0.070984	0.542679	1.02538	Astrocytes	0.639609
SLC33A1	0.767663	0.071121	0.57605	1.02301	Astrocytes	0.639609
CHD4	0.768073	0.0709093	0.576816	1.02275	Astrocytes	0.639609
SESTD1	1.28281	0.0706509	0.979238	1.68048	Astrocytes	0.639609
KRBOX4	0.77683	0.0712119	0.59044	1.02206	Astrocytes	0.639609
LONRF2	0.757951	0.070662	0.561227	1.02363	Astrocytes	0.639609
PLSCR4	1.31843	0.071328	0.976278	1.7805	Astrocytes	0.639819
MCPH1-AS1	0.755814	0.0714911	0.557436	1.02479	Astrocytes	0.640449
HDAC2	0.767424	0.0727044	0.574752	1.02468	Astrocytes	0.640508
ESD	0.763181	0.072224	0.568405	1.0247	Astrocytes	0.640508
RHOJ	0.77779	0.0723329	0.591326	1.02305	Astrocytes	0.640508
SMOX	0.767947	0.0718235	0.576084	1.02371	Astrocytes	0.640508
FAM210A	0.775966	0.0727904	0.588169	1.02373	Astrocytes	0.640508
CNTFR	0.744354	0.072652	0.53923	1.02751	Astrocytes	0.640508
MAEA	0.785123	0.0722372	0.603095	1.02209	Astrocytes	0.640508
PSD2	0.76081	0.0722616	0.564699	1.02503	Astrocytes	0.640508
PLBD2	1.30571	0.0721819	0.976247	1.74637	Astrocytes	0.640508
ATXN10	0.740036	0.0727976	0.532617	1.02823	Astrocytes	0.640508
PI4K2B	0.750971	0.0723634	0.54948	1.02635	Astrocytes	0.640508
GAS7	1.2962	0.0724681	0.976614	1.72037	Astrocytes	0.640508
CCDC66	0.769562	0.0722368	0.578378	1.02394	Astrocytes	0.640508
GNAQ	1.31033	0.0721705	0.975949	1.75927	Astrocytes	0.640508
STK40	1.29441	0.0730435	0.976184	1.71637	Astrocytes	0.64093
HAGH	0.777468	0.073195	0.590324	1.02394	Astrocytes	0.64093
GRAMD2B	0.744926	0.0732116	0.539758	1.02808	Astrocytes	0.64093
NFATC2IP	0.719367	0.0733102	0.501642	1.03159	Astrocytes	0.64093
NTRK3	1.29382	0.0732219	0.976054	1.71503	Astrocytes	0.64093
FOXO3	1.3126	0.0735322	0.974419	1.76814	Astrocytes	0.642057
BCAN	0.744748	0.0742154	0.538881	1.02926	Astrocytes	0.647203
EIF4E	1.28555	0.074909	0.975074	1.69488	Astrocytes	0.649158
FYN	1.28336	0.0749101	0.975239	1.68884	Astrocytes	0.649158
KIF21B	0.7515	0.0745965	0.548955	1.02878	Astrocytes	0.649158
MTUS1	0.767208	0.0747714	0.573219	1.02685	Astrocytes	0.649158
ZNF254	0.787035	0.0747933	0.604758	1.02425	Astrocytes	0.649158
ROCK1	0.778096	0.075075	0.590265	1.0257	Astrocytes	0.649771
YES1	1.31515	0.0752165	0.972536	1.77846	Astrocytes	0.65018
CWC22	0.780309	0.0753167	0.593664	1.02563	Astrocytes	0.650231
GOLM1	0.758502	0.0756272	0.559145	1.02894	Astrocytes	0.650774
TRIB2	0.772321	0.075828	0.580673	1.02722	Astrocytes	0.650774
RBMS3-AS3	1.39793	0.0756079	0.966041	2.02292	Astrocytes	0.650774
CADM4	1.37943	0.0758512	0.967085	1.96758	Astrocytes	0.650774
CKAP5	0.770463	0.0758078	0.577749	1.02746	Astrocytes	0.650774
PRPF18	0.76473	0.0765731	0.568302	1.02905	Astrocytes	0.651488
BCL6	1.27253	0.0767414	0.974448	1.6618	Astrocytes	0.651488
PLEKHM1	1.26798	0.0763055	0.975202	1.64866	Astrocytes	0.651488
FAM171A1	0.757344	0.0768554	0.556635	1.03042	Astrocytes	0.651488
ST3GAL5	0.717524	0.0767727	0.49679	1.03633	Astrocytes	0.651488
UFL1-AS1	0.773675	0.0763467	0.582524	1.02755	Astrocytes	0.651488
KIAA0100	0.761874	0.076775	0.563724	1.02968	Astrocytes	0.651488
LPAR1	1.26773	0.0761236	0.975382	1.6477	Astrocytes	0.651488
CYP27A1	1.30202	0.076879	0.971921	1.74423	Astrocytes	0.651488
SMURF2	1.33721	0.0767249	0.969291	1.84477	Astrocytes	0.651488
KRBA2	0.737871	0.0770651	0.526772	1.03357	Astrocytes	0.652264
APBA1	0.764404	0.0777873	0.567098	1.03036	Astrocytes	0.652474
ROCK2	0.735738	0.0776481	0.523214	1.03459	Astrocytes	0.652474
ERVK13-1	0.787744	0.077732	0.604307	1.02686	Astrocytes	0.652474
COX20	0.750859	0.0772906	0.54638	1.03186	Astrocytes	0.652474
HS3ST5	0.774696	0.0773781	0.583567	1.02842	Astrocytes	0.652474
MFSD1	1.30308	0.0773511	0.971381	1.74804	Astrocytes	0.652474
SH2B1	0.764413	0.0778467	0.567078	1.03042	Astrocytes	0.652474
RAB6A	1.3125	0.0778314	0.970139	1.77569	Astrocytes	0.652474
AC025171.1	0.788643	0.0779674	0.605637	1.02695	Astrocytes	0.652693
CLCN7	0.740532	0.0785029	0.529928	1.03483	Astrocytes	0.653969
VPS26A	1.29718	0.078429	0.970846	1.7332	Astrocytes	0.653969
HNRNPA2B1	0.667677	0.0784236	0.425781	1.047	Astrocytes	0.653969
KCTD7	0.780579	0.0785348	0.592322	1.02867	Astrocytes	0.653969
GADD45A	1.28948	0.0787835	0.971176	1.71211	Astrocytes	0.653969
XKR6	1.3312	0.0787231	0.967688	1.83126	Astrocytes	0.653969
LTO1	0.760166	0.0786481	0.559985	1.03191	Astrocytes	0.653969
DECR1	0.753991	0.0795507	0.549888	1.03385	Astrocytes	0.655522
RASD1	1.26474	0.0792876	0.972915	1.64409	Astrocytes	0.655522
SYNCRIP	0.746196	0.0793865	0.538014	1.03493	Astrocytes	0.655522
EXOC7	0.749184	0.0797226	0.54239	1.03482	Astrocytes	0.655522
ELL2	1.26268	0.0794237	0.972985	1.63863	Astrocytes	0.655522
HEPACAM	0.718911	0.0797228	0.497006	1.03989	Astrocytes	0.655522
SLC37A1	1.32031	0.07931	0.968013	1.80083	Astrocytes	0.655522
CARD8	0.761112	0.0797307	0.560843	1.03289	Astrocytes	0.655522
ANOS1	1.29132	0.0798879	0.969998	1.71907	Astrocytes	0.656032
CEP83	0.80329	0.0806828	0.628248	1.0271	Astrocytes	0.656545
AC073529.1	0.812146	0.0802197	0.643265	1.02536	Astrocytes	0.656545
PSMD1	0.77888	0.0803994	0.588578	1.03071	Astrocytes	0.656545
AASDH	0.746304	0.0805756	0.537485	1.03625	Astrocytes	0.656545
BNIP2	1.25369	0.0805902	0.972849	1.61559	Astrocytes	0.656545
IQCE	0.77924	0.0800865	0.589327	1.03035	Astrocytes	0.656545
TSNAX	1.32274	0.0802805	0.96683	1.80966	Astrocytes	0.656545
CEP68	0.762447	0.0807118	0.562374	1.0337	Astrocytes	0.656545
TTC14	0.774227	0.0811845	0.580714	1.03223	Astrocytes	0.657297
RFX7	0.765085	0.0812368	0.566218	1.0338	Astrocytes	0.657297
PIKFYVE	1.32902	0.0812807	0.965261	1.82987	Astrocytes	0.657297
USP42	0.815394	0.0812153	0.648245	1.02564	Astrocytes	0.657297
SIRT1	0.786482	0.081262	0.60037	1.03029	Astrocytes	0.657297
MRPL1	0.787754	0.0813913	0.602366	1.0302	Astrocytes	0.65742
POLR3A	1.36425	0.0817862	0.96157	1.93555	Astrocytes	0.65841
SCLT1	0.78451	0.0816312	0.596978	1.03095	Astrocytes	0.65841
AGGF1	0.763558	0.0818001	0.563503	1.03464	Astrocytes	0.65841
AL391807.1	0.73552	0.0819984	0.520299	1.03977	Astrocytes	0.659236
EPB41L4A	1.28835	0.0822242	0.968143	1.71447	Astrocytes	0.660253
SCAI	0.751243	0.0825451	0.543927	1.03758	Astrocytes	0.660253
ARHGAP32	0.771202	0.0826034	0.575123	1.03413	Astrocytes	0.660253
DENND4C	0.751801	0.0824833	0.544823	1.03741	Astrocytes	0.660253
IFI16	1.25903	0.0823363	0.970903	1.63267	Astrocytes	0.660253
MED9	1.32218	0.0830913	0.964083	1.81329	Astrocytes	0.660557
CSMD1	0.801136	0.0828523	0.62357	1.02926	Astrocytes	0.660557
BCR	1.35324	0.0833118	0.96092	1.90574	Astrocytes	0.660557
CNTNAP2	0.795537	0.0833087	0.614089	1.0306	Astrocytes	0.660557
RIMS2	0.787841	0.0830631	0.601623	1.0317	Astrocytes	0.660557
OSTF1	1.28131	0.083297	0.967875	1.69625	Astrocytes	0.660557
GARNL3	0.781405	0.0832676	0.591089	1.033	Astrocytes	0.660557
AP2B1	1.27969	0.0835418	0.967822	1.69205	Astrocytes	0.660958
AC097376.3	0.726028	0.083554	0.505196	1.04339	Astrocytes	0.660958
LINC01896	0.77266	0.08391	0.576728	1.03516	Astrocytes	0.661696
LARP7	0.800074	0.0837758	0.621342	1.03022	Astrocytes	0.661696
PPP1R1B	0.758395	0.0839351	0.554229	1.03777	Astrocytes	0.661696
COG4	0.746181	0.0842323	0.535184	1.04036	Astrocytes	0.662872
NEO1	1.28407	0.0842764	0.966732	1.70559	Astrocytes	0.662872
CASD1	0.76934	0.0844186	0.571173	1.03626	Astrocytes	0.663234
SGMS1	1.32399	0.0846954	0.962323	1.82158	Astrocytes	0.664081
ZNF577	0.757643	0.0847189	0.552617	1.03874	Astrocytes	0.664081
GRB2	0.780444	0.0855537	0.58832	1.03531	Astrocytes	0.664908
SMC3	0.763803	0.086445	0.561311	1.03934	Astrocytes	0.664908
KIF3B	0.76461	0.0875915	0.561955	1.04035	Astrocytes	0.664908
ACVR1	1.26147	0.0868583	0.966943	1.64572	Astrocytes	0.664908
ZFAS1	1.32961	0.0881127	0.958368	1.84465	Astrocytes	0.664908
ADAL	0.800892	0.0849305	0.622113	1.03105	Astrocytes	0.664908
ATRX	0.774526	0.0882596	0.577365	1.03902	Astrocytes	0.664908
KNDC1	0.759398	0.0857717	0.554769	1.0395	Astrocytes	0.664908
CNTNAP1	1.23474	0.085309	0.971098	1.56996	Astrocytes	0.664908
TOGARAM1	0.779326	0.0853236	0.586641	1.0353	Astrocytes	0.664908
SASH1	0.793102	0.0878996	0.607727	1.03502	Astrocytes	0.664908
DTNBP1	1.34193	0.086742	0.958448	1.87885	Astrocytes	0.664908
ADHFE1	0.804122	0.0871088	0.626407	1.03226	Astrocytes	0.664908
ARHGAP26	1.32139	0.0860665	0.961242	1.81647	Astrocytes	0.664908
SLC30A6	0.758586	0.0881167	0.552201	1.04211	Astrocytes	0.664908
TRA2B	1.30275	0.0885809	0.960862	1.76628	Astrocytes	0.664908
AC007529.2	1.27694	0.0880387	0.964231	1.69105	Astrocytes	0.664908
TIMMDC1	0.753945	0.0860253	0.546134	1.04083	Astrocytes	0.664908
WWP2	0.728469	0.0868157	0.50691	1.04687	Astrocytes	0.664908
ATIC	0.757701	0.0875385	0.551137	1.04168	Astrocytes	0.664908
PUDP	0.760036	0.0880531	0.554506	1.04175	Astrocytes	0.664908
THAP4	1.30228	0.0867964	0.962555	1.7619	Astrocytes	0.664908
TOX	0.781954	0.0884722	0.589223	1.03773	Astrocytes	0.664908
MAP3K4	0.795047	0.085661	0.612073	1.03272	Astrocytes	0.664908
PPIP5K2	0.812793	0.0869165	0.641081	1.0305	Astrocytes	0.664908
UBAC2	1.29348	0.0886319	0.961853	1.73944	Astrocytes	0.664908
PALLD	1.26232	0.0875438	0.966289	1.64905	Astrocytes	0.664908
PRPF40B	0.764925	0.0869097	0.562825	1.0396	Astrocytes	0.664908
VPS39	0.783649	0.0879275	0.592257	1.03689	Astrocytes	0.664908
AC011346.1	0.780232	0.0876869	0.586849	1.03734	Astrocytes	0.664908
CHD8	0.771621	0.0856434	0.57413	1.03704	Astrocytes	0.664908
MAP6	0.76506	0.086345	0.563346	1.039	Astrocytes	0.664908
FHOD3	0.768904	0.0872826	0.56892	1.03918	Astrocytes	0.664908
NELFA	0.784468	0.0878898	0.593608	1.0367	Astrocytes	0.664908
FAM120AOS	0.755564	0.087161	0.548015	1.04172	Astrocytes	0.664908
UFD1	0.768792	0.0879953	0.568357	1.03991	Astrocytes	0.664908
SLC25A37	1.25947	0.0886801	0.965695	1.64261	Astrocytes	0.664908
ERCC3	0.769322	0.0886025	0.568871	1.0404	Astrocytes	0.664908
SORT1	1.31009	0.0856238	0.962832	1.78258	Astrocytes	0.664908
ZDHHC3	1.28581	0.0880765	0.963204	1.71646	Astrocytes	0.664908
RTF1	0.785374	0.0889227	0.594544	1.03745	Astrocytes	0.665024
BAALC-AS1	1.28847	0.0889847	0.962106	1.72554	Astrocytes	0.665024
PTBP2	0.760892	0.0888619	0.555406	1.0424	Astrocytes	0.665024
PTS	0.802947	0.0891144	0.623451	1.03412	Astrocytes	0.665271
NCOA5	0.780773	0.0893807	0.586834	1.03881	Astrocytes	0.665546
ZDHHC2	1.24834	0.0893126	0.966504	1.61237	Astrocytes	0.665546
ARHGEF3	1.2565	0.0894406	0.965435	1.63533	Astrocytes	0.665546
DTNA	1.2793	0.0896838	0.962557	1.70026	Astrocytes	0.666637
MPZL1	1.26512	0.0898897	0.964053	1.66021	Astrocytes	0.666703
BIN3	1.3361	0.0899792	0.955806	1.86769	Astrocytes	0.666703
HEATR1	0.805455	0.0899826	0.627226	1.03433	Astrocytes	0.666703
SLC39A14	1.26165	0.0903044	0.964131	1.65098	Astrocytes	0.667653
FLOT2	1.28097	0.0902656	0.961863	1.70595	Astrocytes	0.667653
ZNF24	0.761472	0.0904216	0.555467	1.04388	Astrocytes	0.667803
METTL16	0.774121	0.0906083	0.575467	1.04135	Astrocytes	0.667944
MSRA	1.28585	0.0906866	0.960924	1.72066	Astrocytes	0.667944
ADAMTSL4-AS1	1.28686	0.0907312	0.960766	1.72362	Astrocytes	0.667944
HERC3	0.755893	0.0910339	0.546387	1.04573	Astrocytes	0.668034
AL157388.1	0.761619	0.0908911	0.555443	1.04433	Astrocytes	0.668034
GPBP1L1	0.779933	0.0910045	0.584626	1.04049	Astrocytes	0.668034
CACNG2	0.620458	0.0223699	0.411938	0.934529	Extratelencephalic L5 Neurons	0.669835
NARS	1.50299	0.0404777	1.01782	2.21942	Extratelencephalic L5 Neurons	0.669835
UBE3D	0.666339	0.0382611	0.453863	0.978287	Extratelencephalic L5 Neurons	0.669835
SYT11	1.58818	0.0196876	1.07663	2.3428	Extratelencephalic L5 Neurons	0.669835
RPL37A	1.35496	0.07135	0.973939	1.88503	Extratelencephalic L5 Neurons	0.669835
CPPED1	0.733586	0.0625415	0.529485	1.01636	Extratelencephalic L5 Neurons	0.669835
ZFYVE9	0.667766	0.0392677	0.454855	0.980338	Extratelencephalic L5 Neurons	0.669835
RBM17	1.69712	0.0340282	1.04066	2.76766	Extratelencephalic L5 Neurons	0.669835
LAMP1	1.65972	0.00633026	1.15364	2.38781	Extratelencephalic L5 Neurons	0.669835
ACTG1	1.58542	0.0192756	1.07774	2.33224	Extratelencephalic L5 Neurons	0.669835
YARS	1.46412	0.0577799	0.987493	2.1708	Extratelencephalic L5 Neurons	0.669835
CAMKK2	1.40427	0.0691086	0.973772	2.0251	Extratelencephalic L5 Neurons	0.669835
SEPTIN11	1.41515	0.0514291	0.997842	2.00697	Extratelencephalic L5 Neurons	0.669835
STARD13	1.33992	0.0842731	0.961182	1.8679	Extratelencephalic L5 Neurons	0.669835
ZNF559	0.737536	0.0573515	0.53881	1.00956	Extratelencephalic L5 Neurons	0.669835
CAPRIN1	1.38726	0.0766042	0.965619	1.99302	Extratelencephalic L5 Neurons	0.669835
ANKRD34C-AS1	0.760156	0.0783895	0.560118	1.03163	Extratelencephalic L5 Neurons	0.669835
APPL1	1.37129	0.0484883	1.00209	1.87651	Extratelencephalic L5 Neurons	0.669835
GNG2	1.44821	0.048767	1.002	2.09313	Extratelencephalic L5 Neurons	0.669835
ATP5F1B	1.39956	0.061387	0.984081	1.99045	Extratelencephalic L5 Neurons	0.669835
ARHGAP22	0.672708	0.0509532	0.451789	1.00165	Extratelencephalic L5 Neurons	0.669835
KANTR	0.741891	0.0723525	0.535687	1.02747	Extratelencephalic L5 Neurons	0.669835
CACNA1A	0.692599	0.0823961	0.457592	1.0483	Extratelencephalic L5 Neurons	0.669835
ATP6V1G1	1.41401	0.0593162	0.98647	2.02685	Extratelencephalic L5 Neurons	0.669835
RBM41	0.743818	0.0619161	0.54516	1.01487	Extratelencephalic L5 Neurons	0.669835
ATP5ME	1.63954	0.0121093	1.11424	2.41248	Extratelencephalic L5 Neurons	0.669835
PGM2L1	1.50246	0.0503858	0.999308	2.25896	Extratelencephalic L5 Neurons	0.669835
KLHL2	1.4323	0.0512643	0.998023	2.05554	Extratelencephalic L5 Neurons	0.669835
TPI1	1.37317	0.071792	0.972286	1.93934	Extratelencephalic L5 Neurons	0.669835
DIPK1A	0.460806	0.000112584	0.310984	0.682806	Extratelencephalic L5 Neurons	0.669835
OAT	1.57494	0.0201185	1.07376	2.31005	Extratelencephalic L5 Neurons	0.669835
PKD1L1	0.684076	0.0486313	0.469025	0.997728	Extratelencephalic L5 Neurons	0.669835
POLR1A	0.695994	0.0549222	0.480718	1.00768	Extratelencephalic L5 Neurons	0.669835
BTBD1	1.32447	0.0396037	1.01345	1.73093	Extratelencephalic L5 Neurons	0.669835
ATP6V1G2	1.48219	0.0446392	1.00946	2.17631	Extratelencephalic L5 Neurons	0.669835
GLO1	1.36771	0.0775824	0.965974	1.93653	Extratelencephalic L5 Neurons	0.669835
VMA21	1.55501	0.0232983	1.06188	2.27716	Extratelencephalic L5 Neurons	0.669835
IL1RAPL1	0.67313	0.0162318	0.487447	0.929546	Extratelencephalic L5 Neurons	0.669835
TSPYL1	1.563	0.0202634	1.07201	2.27887	Extratelencephalic L5 Neurons	0.669835
METTL25	0.696587	0.0310176	0.501513	0.96754	Extratelencephalic L5 Neurons	0.669835
CAMK2G	1.52967	0.019125	1.07197	2.1828	Extratelencephalic L5 Neurons	0.669835
AL358944.1	0.736376	0.0530999	0.540033	1.00411	Extratelencephalic L5 Neurons	0.669835
KAZN	0.743167	0.078521	0.533911	1.03444	Extratelencephalic L5 Neurons	0.669835
PCSK2	0.705802	0.0269631	0.518331	0.961077	Extratelencephalic L5 Neurons	0.669835
YWHAG	1.52568	0.0365318	1.02681	2.26691	Extratelencephalic L5 Neurons	0.669835
DPP6	0.743906	0.0688489	0.540888	1.02312	Extratelencephalic L5 Neurons	0.669835
TTC26	0.652544	0.0305721	0.443188	0.960798	Extratelencephalic L5 Neurons	0.669835
SAP18	1.39673	0.0839373	0.95619	2.04024	Extratelencephalic L5 Neurons	0.669835
AC002460.2	0.728673	0.0799486	0.511276	1.03851	Extratelencephalic L5 Neurons	0.669835
FAM217B	1.64372	0.0104525	1.12361	2.40459	Extratelencephalic L5 Neurons	0.669835
ENC1	1.64046	0.0363593	1.03193	2.60785	Extratelencephalic L5 Neurons	0.669835
AC090945.1	0.689309	0.0359884	0.486842	0.975976	Extratelencephalic L5 Neurons	0.669835
GRID2	0.63272	0.0133634	0.44027	0.909293	Extratelencephalic L5 Neurons	0.669835
CARS	1.39853	0.0851684	0.954584	2.04894	Extratelencephalic L5 Neurons	0.669835
GRIA1	0.72604	0.070685	0.513086	1.02738	Extratelencephalic L5 Neurons	0.669835
GOSR1	0.738202	0.06684	0.533577	1.0213	Extratelencephalic L5 Neurons	0.669835
SLC25A46	1.45021	0.0626903	0.980499	2.14493	Extratelencephalic L5 Neurons	0.669835
TMEM184B	1.39667	0.0433809	1.00998	1.93142	Extratelencephalic L5 Neurons	0.669835
BRI3BP	1.46795	0.0304382	1.03691	2.07818	Extratelencephalic L5 Neurons	0.669835
AC124852.1	0.68228	0.0301342	0.482923	0.963935	Extratelencephalic L5 Neurons	0.669835
TAX1BP1	1.34927	0.0858876	0.958585	1.8992	Extratelencephalic L5 Neurons	0.669835
EP400	0.744411	0.0652789	0.543893	1.01885	Extratelencephalic L5 Neurons	0.669835
FGFR1OP	0.585842	0.00356877	0.408869	0.839415	Extratelencephalic L5 Neurons	0.669835
KIAA0586	0.625078	0.00834431	0.440865	0.886265	Extratelencephalic L5 Neurons	0.669835
CFL1	1.49434	0.0270419	1.04664	2.13354	Extratelencephalic L5 Neurons	0.669835
G3BP1	1.33851	0.0593776	0.988528	1.8124	Extratelencephalic L5 Neurons	0.669835
RLIM	1.39152	0.0840121	0.956583	2.02422	Extratelencephalic L5 Neurons	0.669835
PTPRM	0.714116	0.0616308	0.501664	1.01654	Extratelencephalic L5 Neurons	0.669835
NCAM1	1.4777	0.0344009	1.02909	2.12188	Extratelencephalic L5 Neurons	0.669835
NORAD	1.45606	0.0791165	0.957251	2.21479	Extratelencephalic L5 Neurons	0.669835
GOLPH3	1.36938	0.0556481	0.992437	1.8895	Extratelencephalic L5 Neurons	0.669835
HMGCR	2.2155	0.00189941	1.34101	3.66025	Extratelencephalic L5 Neurons	0.669835
GALK2	0.612815	0.0114641	0.419235	0.895781	Extratelencephalic L5 Neurons	0.669835
DHX8	0.600209	0.00205397	0.433839	0.83038	Extratelencephalic L5 Neurons	0.669835
KAT6B	0.631311	0.00697445	0.451992	0.881771	Extratelencephalic L5 Neurons	0.669835
RAB6B	1.62502	0.0180853	1.08649	2.43048	Extratelencephalic L5 Neurons	0.669835
ZNF507	0.70955	0.0570139	0.498332	1.01029	Extratelencephalic L5 Neurons	0.669835
FBXL3	1.37194	0.0709414	0.973368	1.9337	Extratelencephalic L5 Neurons	0.669835
USP9Y	0.0506783	0.0623933	0.00220073	1.16702	Extratelencephalic L5 Neurons	0.669835
ARHGEF3	0.729329	0.0642333	0.522084	1.01884	Extratelencephalic L5 Neurons	0.669835
PDHA1	1.42162	0.0704895	0.971011	2.08134	Extratelencephalic L5 Neurons	0.669835
ZDHHC20	0.702321	0.0469395	0.495615	0.995237	Extratelencephalic L5 Neurons	0.669835
PNKD	1.48378	0.0590791	0.98498	2.23518	Extratelencephalic L5 Neurons	0.669835
SUPT3H	0.69122	0.0767892	0.459175	1.04053	Extratelencephalic L5 Neurons	0.669835
TP53BP1	1.36793	0.0857639	0.956864	1.95558	Extratelencephalic L5 Neurons	0.669835
GTPBP10	0.743286	0.0832428	0.531331	1.03979	Extratelencephalic L5 Neurons	0.669835
CDC42	1.38845	0.0611528	0.984761	1.95764	Extratelencephalic L5 Neurons	0.669835
WASL	1.50027	0.0246735	1.05309	2.13733	Extratelencephalic L5 Neurons	0.669835
CNTNAP3B	1.50412	0.0111609	1.09737	2.06163	Extratelencephalic L5 Neurons	0.669835
HDAC8	0.715886	0.072692	0.496963	1.03125	Extratelencephalic L5 Neurons	0.669835
ARPC5L	1.5189	0.0233619	1.05831	2.17993	Extratelencephalic L5 Neurons	0.669835
SLC39A11	0.718855	0.0854377	0.493488	1.04714	Extratelencephalic L5 Neurons	0.669835
MRPS36	1.42182	0.0506926	0.998933	2.02372	Extratelencephalic L5 Neurons	0.669835
FAM189A1	0.565541	0.00280486	0.389144	0.821898	Extratelencephalic L5 Neurons	0.669835
NUDT4	1.53942	0.0265603	1.05145	2.25385	Extratelencephalic L5 Neurons	0.669835
TOLLIP	1.44216	0.0842026	0.951757	2.18524	Extratelencephalic L5 Neurons	0.669835
RFX7	0.593335	0.00333863	0.418691	0.840826	Extratelencephalic L5 Neurons	0.669835
FLCN	0.686521	0.0289303	0.489881	0.962094	Extratelencephalic L5 Neurons	0.669835
CPEB1	0.644936	0.0143422	0.453985	0.916203	Extratelencephalic L5 Neurons	0.669835
MAP7D1	1.58095	0.00994103	1.11603	2.23954	Extratelencephalic L5 Neurons	0.669835
SOD2	1.65126	0.0129603	1.11175	2.45258	Extratelencephalic L5 Neurons	0.669835
IST1	1.37587	0.0570878	0.990426	1.91132	Extratelencephalic L5 Neurons	0.669835
CLSTN2	0.689885	0.085729	0.451735	1.05359	Extratelencephalic L5 Neurons	0.669835
IQCH-AS1	1.37651	0.0642885	0.98121	1.93106	Extratelencephalic L5 Neurons	0.669835
GATB	1.41631	0.0523635	0.996442	2.0131	Extratelencephalic L5 Neurons	0.669835
RNF130	0.688987	0.0442437	0.479276	0.990458	Extratelencephalic L5 Neurons	0.669835
PPM1K	1.46368	0.0450814	1.00838	2.12456	Extratelencephalic L5 Neurons	0.669835
AC024610.2	0.744568	0.0588914	0.54827	1.01115	Extratelencephalic L5 Neurons	0.669835
MEF2C-AS1	1.332	0.0753589	0.971128	1.82697	Extratelencephalic L5 Neurons	0.669835
DIRAS1	1.52411	0.0636366	0.976363	2.37915	Extratelencephalic L5 Neurons	0.669835
CBX3	1.48742	0.0724587	0.964446	2.29397	Extratelencephalic L5 Neurons	0.669835
MRPL1	0.643677	0.00632379	0.469166	0.883099	Extratelencephalic L5 Neurons	0.669835
DSCAML1	0.637382	0.0186415	0.437968	0.927592	Extratelencephalic L5 Neurons	0.669835
ATP5F1E	1.41425	0.0732674	0.967857	2.06652	Extratelencephalic L5 Neurons	0.669835
VEGFD	0.726067	0.0326016	0.541335	0.973841	Extratelencephalic L5 Neurons	0.669835
ENPP4	1.42559	0.053136	0.99521	2.04209	Extratelencephalic L5 Neurons	0.669835
TRAF3	0.696837	0.034009	0.498998	0.973113	Extratelencephalic L5 Neurons	0.669835
PDE9A	0.580171	0.00409293	0.400068	0.841354	Extratelencephalic L5 Neurons	0.669835
NCOA6	0.713157	0.0573978	0.503217	1.01068	Extratelencephalic L5 Neurons	0.669835
PCYOX1	1.69927	0.00502981	1.1732	2.46124	Extratelencephalic L5 Neurons	0.669835
OAZ1	1.71655	0.00909292	1.14378	2.57616	Extratelencephalic L5 Neurons	0.669835
AC025159.1	0.621787	0.0097936	0.433569	0.891715	Extratelencephalic L5 Neurons	0.669835
NELFA	0.716424	0.058742	0.506974	1.01241	Extratelencephalic L5 Neurons	0.669835
CS	1.54865	0.00424227	1.14751	2.09002	Extratelencephalic L5 Neurons	0.669835
UBE2B	1.55168	0.0356684	1.02986	2.3379	Extratelencephalic L5 Neurons	0.669835
DAB1	0.674466	0.066208	0.443067	1.02672	Extratelencephalic L5 Neurons	0.669835
VCP	1.5812	0.0247372	1.05998	2.3587	Extratelencephalic L5 Neurons	0.669835
CDK5R1	1.55233	0.0219174	1.06574	2.26109	Extratelencephalic L5 Neurons	0.669835
KCND2	0.662681	0.0200216	0.468515	0.937315	Extratelencephalic L5 Neurons	0.669835
HLCS	0.699257	0.0619569	0.480286	1.01806	Extratelencephalic L5 Neurons	0.669835
SACM1L	1.44559	0.0769888	0.960866	2.17485	Extratelencephalic L5 Neurons	0.669835
PTCHD4	0.705049	0.0488858	0.49794	0.9983	Extratelencephalic L5 Neurons	0.669835
FRA10AC1	1.40008	0.0436403	1.00964	1.94149	Extratelencephalic L5 Neurons	0.669835
CNST	1.49768	0.0446701	1.00965	2.22159	Extratelencephalic L5 Neurons	0.669835
ACSL3	1.69317	0.00848325	1.14394	2.50609	Extratelencephalic L5 Neurons	0.669835
NCOA4	1.62577	0.00861662	1.13131	2.33635	Extratelencephalic L5 Neurons	0.669835
MAPK6	1.70005	0.00312669	1.19564	2.41727	Extratelencephalic L5 Neurons	0.669835
PSMB7	1.38366	0.0406628	1.01389	1.8883	Extratelencephalic L5 Neurons	0.669835
SPOCK1	0.678248	0.0395882	0.468606	0.981679	Extratelencephalic L5 Neurons	0.669835
AC005100.1	0.736052	0.0557969	0.537675	1.00762	Extratelencephalic L5 Neurons	0.669835
PTPRF	1.49662	0.0375257	1.02353	2.18836	Extratelencephalic L5 Neurons	0.669835
BEX4	1.51684	0.044217	1.01083	2.27614	Extratelencephalic L5 Neurons	0.669835
SERP1	1.61392	0.0223413	1.07036	2.43353	Extratelencephalic L5 Neurons	0.669835
CALM3	1.45559	0.0721235	0.966815	2.19148	Extratelencephalic L5 Neurons	0.669835
ST6GALNAC3	0.702264	0.0451695	0.496937	0.992429	Extratelencephalic L5 Neurons	0.669835
DDX10	0.705176	0.0672354	0.485096	1.0251	Extratelencephalic L5 Neurons	0.669835
SRRM3	0.7185	0.079144	0.496758	1.03922	Extratelencephalic L5 Neurons	0.669835
PINX1	0.647039	0.0140794	0.457085	0.915933	Extratelencephalic L5 Neurons	0.669835
GRIK3	0.711209	0.0847797	0.48272	1.04785	Extratelencephalic L5 Neurons	0.669835
KCTD3	0.719536	0.0572065	0.512537	1.01014	Extratelencephalic L5 Neurons	0.669835
SLF2	0.744227	0.0654862	0.543484	1.01912	Extratelencephalic L5 Neurons	0.669835
GNA13	1.49797	0.0330495	1.03305	2.17214	Extratelencephalic L5 Neurons	0.669835
CASC2	0.667549	0.0407618	0.453252	0.983166	Extratelencephalic L5 Neurons	0.669835
PPP1R16B	0.678342	0.0384022	0.469781	0.979494	Extratelencephalic L5 Neurons	0.669835
ARPC2	1.76525	0.00337359	1.20723	2.58121	Extratelencephalic L5 Neurons	0.669835
CNTNAP2	0.667745	0.0131917	0.485194	0.918979	Extratelencephalic L5 Neurons	0.669835
TMEM131L	0.690105	0.0699873	0.462033	1.03076	Extratelencephalic L5 Neurons	0.669835
SNX29	0.631233	0.0350919	0.411477	0.968353	Extratelencephalic L5 Neurons	0.669835
MTERF1	0.711231	0.0815456	0.484709	1.04361	Extratelencephalic L5 Neurons	0.669835
CHRM3	0.686704	0.0443212	0.476083	0.990506	Extratelencephalic L5 Neurons	0.669835
RPL15	1.3898	0.0809138	0.960339	2.01131	Extratelencephalic L5 Neurons	0.669835
KCNQ1OT1	0.614147	0.0239976	0.402179	0.937832	Extratelencephalic L5 Neurons	0.669835
PCBP1	1.61781	0.015613	1.09537	2.38942	Extratelencephalic L5 Neurons	0.669835
PSD3	1.65952	0.0183029	1.08954	2.5277	Extratelencephalic L5 Neurons	0.669835
SUPT16H	1.69172	0.0118257	1.12344	2.54746	Extratelencephalic L5 Neurons	0.669835
PGAM1	1.50702	0.0321276	1.03561	2.19302	Extratelencephalic L5 Neurons	0.669835
AC079447.1	0.64131	0.0184694	0.443169	0.92804	Extratelencephalic L5 Neurons	0.669835
SYT4	1.46779	0.051311	0.997811	2.15914	Extratelencephalic L5 Neurons	0.669835
FAM131A	1.61479	0.0276515	1.05412	2.47368	Extratelencephalic L5 Neurons	0.669835
NAP1L2	1.46951	0.0482763	1.00291	2.15317	Extratelencephalic L5 Neurons	0.669835
PHACTR4	0.572117	0.00524556	0.386555	0.846758	Extratelencephalic L5 Neurons	0.669835
TCERG1L	0.752357	0.0502451	0.565866	1.00031	Extratelencephalic L5 Neurons	0.669835
NFASC	0.723511	0.05776	0.517919	1.01071	Extratelencephalic L5 Neurons	0.669835
GUCY1B1	1.60119	0.0307067	1.04473	2.45403	Extratelencephalic L5 Neurons	0.669835
SPOCK2	1.42855	0.0651399	0.977873	2.08694	Extratelencephalic L5 Neurons	0.669835
PTPRN2	0.678908	0.0152516	0.496532	0.928269	Extratelencephalic L5 Neurons	0.669835
TRPS1	1.33549	0.0823855	0.963543	1.85101	Extratelencephalic L5 Neurons	0.669835
CHCHD2	1.59721	0.012904	1.10422	2.31031	Extratelencephalic L5 Neurons	0.669835
CPLANE1	0.674223	0.0454683	0.4582	0.99209	Extratelencephalic L5 Neurons	0.669835
ZFX	0.626633	0.0718129	0.376722	1.04233	Extratelencephalic L5 Neurons	0.669835
ATXN7L3B	1.39358	0.0681703	0.975536	1.99077	Extratelencephalic L5 Neurons	0.669835
NCEH1	1.54922	0.0363336	1.02824	2.33416	Extratelencephalic L5 Neurons	0.669835
COX7A2L	1.54206	0.0233421	1.06055	2.24218	Extratelencephalic L5 Neurons	0.669835
KCNH1	0.674397	0.0242009	0.478786	0.949926	Extratelencephalic L5 Neurons	0.669835
ZMYM4	0.688349	0.0358302	0.485677	0.975597	Extratelencephalic L5 Neurons	0.669835
SYNJ2BP	1.3928	0.0443472	1.0084	1.92372	Extratelencephalic L5 Neurons	0.669835
CTSB	1.45436	0.0442764	1.00963	2.095	Extratelencephalic L5 Neurons	0.669835
FAM49A	1.73913	0.0118178	1.13038	2.67572	Extratelencephalic L5 Neurons	0.669835
BEX1	1.41079	0.0650538	0.978756	2.03352	Extratelencephalic L5 Neurons	0.669835
AGGF1	1.47043	0.0407869	1.01628	2.12753	Extratelencephalic L5 Neurons	0.669835
SLC22A17	1.61125	0.0338358	1.03709	2.50328	Extratelencephalic L5 Neurons	0.669835
CRTC3	0.703873	0.0630951	0.486029	1.01936	Extratelencephalic L5 Neurons	0.669835
KIF5A	1.49025	0.0575386	0.987309	2.24939	Extratelencephalic L5 Neurons	0.669835
PRKAG2	0.64331	0.012326	0.455388	0.908779	Extratelencephalic L5 Neurons	0.669835
CPEB4	1.44471	0.0336867	1.02878	2.02879	Extratelencephalic L5 Neurons	0.669835
RNF180	0.472455	0.000520334	0.309335	0.721592	Extratelencephalic L5 Neurons	0.669835
DENND4A	0.700564	0.0452005	0.494535	0.992427	Extratelencephalic L5 Neurons	0.669835
KCNH7	0.709846	0.0583383	0.49782	1.01218	Extratelencephalic L5 Neurons	0.669835
SRSF4	0.732069	0.0373424	0.545809	0.981891	Extratelencephalic L5 Neurons	0.669835
ARL1	1.47599	0.0469407	1.00527	2.16713	Extratelencephalic L5 Neurons	0.669835
ZNF431	0.678244	0.0243029	0.483788	0.950861	Extratelencephalic L5 Neurons	0.669835
PCSK6	0.754093	0.0856467	0.546576	1.0404	Extratelencephalic L5 Neurons	0.669835
AASDHPPT	1.42403	0.0527408	0.995818	2.03637	Extratelencephalic L5 Neurons	0.669835
CDH13	0.685043	0.0420807	0.475678	0.986558	Extratelencephalic L5 Neurons	0.669835
ZBTB7C	0.664847	0.0269126	0.463122	0.954439	Extratelencephalic L5 Neurons	0.669835
STMN3	1.49393	0.0776046	0.956562	2.33316	Extratelencephalic L5 Neurons	0.669835
HEATR3	0.683976	0.0241017	0.491693	0.951454	Extratelencephalic L5 Neurons	0.669835
LINC00551	1.37516	0.0664804	0.978564	1.93248	Extratelencephalic L5 Neurons	0.669835
AC239809.3	0.585929	0.00428784	0.406006	0.845585	Extratelencephalic L5 Neurons	0.669835
ENSA	1.40387	0.0514469	0.997866	1.97507	Extratelencephalic L5 Neurons	0.669835
MED31	1.75257	0.0182938	1.09968	2.79308	Extratelencephalic L5 Neurons	0.669835
MLLT11	1.43184	0.0679508	0.973865	2.10518	Extratelencephalic L5 Neurons	0.669835
RUNDC3A	1.50941	0.0516949	0.996971	2.28523	Extratelencephalic L5 Neurons	0.669835
ZNF248	0.719171	0.0543133	0.514056	1.00613	Extratelencephalic L5 Neurons	0.669835
DANT2	0.764662	0.0644425	0.575375	1.01622	Extratelencephalic L5 Neurons	0.669835
JKAMP	1.50748	0.0507037	0.998736	2.27537	Extratelencephalic L5 Neurons	0.669835
DNAJC5	1.58943	0.0110607	1.11173	2.27238	Extratelencephalic L5 Neurons	0.669835
KIF1A	1.50799	0.0466329	1.00613	2.26018	Extratelencephalic L5 Neurons	0.669835
AL008633.1	0.677831	0.0478555	0.461141	0.996342	Extratelencephalic L5 Neurons	0.669835
KDSR	1.43858	0.0416594	1.01383	2.0413	Extratelencephalic L5 Neurons	0.669835
SRP9	1.40047	0.0622811	0.982857	1.99552	Extratelencephalic L5 Neurons	0.669835
MTCH1	1.8379	0.00762924	1.17529	2.87408	Extratelencephalic L5 Neurons	0.669835
SLC1A4	1.56046	0.0211484	1.06893	2.27803	Extratelencephalic L5 Neurons	0.669835
SKP1	1.50633	0.0377548	1.02344	2.21706	Extratelencephalic L5 Neurons	0.669835
RAB4A	1.38258	0.0758475	0.966859	1.97706	Extratelencephalic L5 Neurons	0.669835
TTC21B	0.744285	0.0841884	0.53231	1.04067	Extratelencephalic L5 Neurons	0.669835
TRAPPC10	0.736338	0.0563558	0.537714	1.00833	Extratelencephalic L5 Neurons	0.669835
TOMM20	1.50256	0.0400598	1.01864	2.21638	Extratelencephalic L5 Neurons	0.669835
ZNF10	0.682825	0.0459353	0.469468	0.993145	Extratelencephalic L5 Neurons	0.669835
GLUD1	1.56857	0.0213626	1.06908	2.30142	Extratelencephalic L5 Neurons	0.669835
SMIM7	1.41852	0.0610265	0.98395	2.04502	Extratelencephalic L5 Neurons	0.669835
LINGO2	0.695673	0.0417424	0.490567	0.986532	Extratelencephalic L5 Neurons	0.669835
NLGN4Y	0.037928	0.000706984	0.00570943	0.251957	Extratelencephalic L5 Neurons	0.669835
STMN1	1.5081	0.0311046	1.03801	2.1911	Extratelencephalic L5 Neurons	0.669835
FAM153CP	0.642903	0.0271316	0.434475	0.951319	Extratelencephalic L5 Neurons	0.669835
MYO19	1.35841	0.0836953	0.960024	1.92213	Extratelencephalic L5 Neurons	0.669835
BASP1	1.66965	0.0525845	0.994282	2.80377	Extratelencephalic L5 Neurons	0.669835
MIR2052HG	0.698884	0.039475	0.496942	0.982889	Extratelencephalic L5 Neurons	0.669835
EIF1	1.43479	0.0675186	0.97431	2.11289	Extratelencephalic L5 Neurons	0.669835
R3HDM2	0.68368	0.0453284	0.471127	0.992129	Extratelencephalic L5 Neurons	0.669835
LINC02175	0.731722	0.0549747	0.531862	1.00668	Extratelencephalic L5 Neurons	0.669835
SH3PXD2A	0.716141	0.0642185	0.502841	1.01992	Extratelencephalic L5 Neurons	0.669835
RALYL	0.733412	0.0687539	0.52522	1.02413	Extratelencephalic L5 Neurons	0.669835
FEM1B	1.54428	0.0160657	1.08411	2.19977	Extratelencephalic L5 Neurons	0.669835
MRFAP1	1.62253	0.00429478	1.16393	2.26182	Extratelencephalic L5 Neurons	0.669835
TMSB4X	1.42878	0.0573226	0.988956	2.06422	Extratelencephalic L5 Neurons	0.669835
HERPUD1	1.66431	0.0172985	1.09412	2.53164	Extratelencephalic L5 Neurons	0.669835
DGKB	0.722739	0.0776731	0.503878	1.03666	Extratelencephalic L5 Neurons	0.669835
AL590705.1	0.606455	0.00411466	0.430949	0.853435	Extratelencephalic L5 Neurons	0.669835
FGF1	1.50747	0.0318686	1.03622	2.19302	Extratelencephalic L5 Neurons	0.669835
MADD	1.50679	0.0372139	1.02458	2.21596	Extratelencephalic L5 Neurons	0.669835
AL136317.2	0.744953	0.0637741	0.545669	1.01702	Extratelencephalic L5 Neurons	0.669835
SYAP1	1.78265	0.00100797	1.26304	2.51603	Extratelencephalic L5 Neurons	0.669835
KRAS	1.4581	0.0339928	1.0289	2.06633	Extratelencephalic L5 Neurons	0.669835
TMEM230	1.81054	0.00418662	1.20603	2.71805	Extratelencephalic L5 Neurons	0.669835
EPB41	0.669069	0.0248909	0.470942	0.950547	Extratelencephalic L5 Neurons	0.669835
GPX4	1.38004	0.0809561	0.961123	1.98154	Extratelencephalic L5 Neurons	0.669835
NIPA1	1.5984	0.00552605	1.14763	2.22623	Extratelencephalic L5 Neurons	0.669835
HCN1	0.739573	0.073732	0.53135	1.02939	Extratelencephalic L5 Neurons	0.669835
ZNF385D	0.745191	0.0808111	0.535648	1.03671	Extratelencephalic L5 Neurons	0.669835
PKNOX2	0.64868	0.0295708	0.439242	0.957982	Extratelencephalic L5 Neurons	0.669835
RTL8C	1.44044	0.0746367	0.964352	2.15157	Extratelencephalic L5 Neurons	0.669835
TENM3	0.645258	0.0267283	0.437931	0.950737	Extratelencephalic L5 Neurons	0.669835
RDH11	1.49414	0.0495434	1.00079	2.23067	Extratelencephalic L5 Neurons	0.669835
AFF3	0.578204	0.00229948	0.406552	0.82233	Extratelencephalic L5 Neurons	0.669835
ABAT	1.66911	0.00930493	1.13451	2.45562	Extratelencephalic L5 Neurons	0.669835
PIP4P2	1.47293	0.0272787	1.04438	2.07734	Extratelencephalic L5 Neurons	0.669835
TMEM268	1.9332	0.000554032	1.3298	2.81038	Extratelencephalic L5 Neurons	0.669835
YWHAB	1.42011	0.0653161	0.977998	2.06207	Extratelencephalic L5 Neurons	0.669835
PDIA6	1.46924	0.0486954	1.0022	2.15393	Extratelencephalic L5 Neurons	0.669835
INA	1.39242	0.066227	0.978056	1.98233	Extratelencephalic L5 Neurons	0.669835
RAC1	1.52854	0.0216339	1.06419	2.19552	Extratelencephalic L5 Neurons	0.669835
SPIDR	0.634252	0.0228299	0.428547	0.938698	Extratelencephalic L5 Neurons	0.669835
ATP5F1D	1.38749	0.0765932	0.965615	1.99368	Extratelencephalic L5 Neurons	0.669835
TUBB4A	1.37849	0.0821834	0.95986	1.97969	Extratelencephalic L5 Neurons	0.669835
CDK8	0.719729	0.0313205	0.533508	0.970952	Extratelencephalic L5 Neurons	0.669835
PTP4A2	1.67161	0.00847786	1.14024	2.4506	Extratelencephalic L5 Neurons	0.669835
TRPM2	0.746556	0.085635	0.534957	1.04185	Extratelencephalic L5 Neurons	0.669835
MRPS27	0.709705	0.0664737	0.492073	1.02359	Extratelencephalic L5 Neurons	0.669835
CEP63	0.686034	0.0435521	0.475801	0.989161	Extratelencephalic L5 Neurons	0.669835
MORF4L1	1.46984	0.0642206	0.977498	2.21015	Extratelencephalic L5 Neurons	0.669835
AP3D1	1.35902	0.0842736	0.959344	1.9252	Extratelencephalic L5 Neurons	0.669835
TSC22D3	1.42381	0.0482823	1.00266	2.02186	Extratelencephalic L5 Neurons	0.669835
SCOC	1.51535	0.0342738	1.03127	2.22664	Extratelencephalic L5 Neurons	0.669835
ADGRB2	1.56669	0.0637631	0.974616	2.51844	Extratelencephalic L5 Neurons	0.669835
AC106791.1	1.34363	0.0828515	0.962304	1.87605	Extratelencephalic L5 Neurons	0.669835
CCT5	1.63014	0.0200021	1.07999	2.46056	Extratelencephalic L5 Neurons	0.669835
HNRNPK	1.65617	0.0106197	1.12466	2.43886	Extratelencephalic L5 Neurons	0.669835
MT3	1.36978	0.0750125	0.968755	1.93681	Extratelencephalic L5 Neurons	0.669835
ZCCHC2	1.50419	0.0552867	0.990802	2.2836	Extratelencephalic L5 Neurons	0.669835
SRSF9	1.40713	0.0509937	0.998519	1.98295	Extratelencephalic L5 Neurons	0.669835
KLHDC2	1.57206	0.0538228	0.992581	2.48986	Extratelencephalic L5 Neurons	0.669835
NCL	1.35971	0.0673888	0.978245	1.88994	Extratelencephalic L5 Neurons	0.669835
HS6ST2	0.720786	0.0628768	0.510473	1.01775	Extratelencephalic L5 Neurons	0.669835
PPT1	1.40849	0.0774972	0.962947	2.06019	Extratelencephalic L5 Neurons	0.669835
AKAP1	1.63772	0.0076802	1.13952	2.35374	Extratelencephalic L5 Neurons	0.669835
CYSTM1	1.70273	0.014253	1.11248	2.60615	Extratelencephalic L5 Neurons	0.669835
ARMCX4	0.687573	0.0321169	0.48812	0.968526	Extratelencephalic L5 Neurons	0.669835
FAU	1.40003	0.0657606	0.978304	2.00354	Extratelencephalic L5 Neurons	0.669835
SULT4A1	1.46969	0.0682669	0.971531	2.22329	Extratelencephalic L5 Neurons	0.669835
AARS	1.50204	0.0337884	1.03165	2.18689	Extratelencephalic L5 Neurons	0.669835
AL731769.2	0.669901	0.0165824	0.482694	0.929713	Extratelencephalic L5 Neurons	0.669835
UQCR10	1.4584	0.0719409	0.966903	2.19973	Extratelencephalic L5 Neurons	0.669835
DNAJB6	1.7886	0.00342242	1.21178	2.64	Extratelencephalic L5 Neurons	0.669835
GABRB3	0.729861	0.0689819	0.519807	1.0248	Extratelencephalic L5 Neurons	0.669835
SLK	1.37259	0.0654277	0.979975	1.92249	Extratelencephalic L5 Neurons	0.669835
IKBKB	0.721967	0.0367042	0.531831	0.980078	Extratelencephalic L5 Neurons	0.669835
GBF1	0.625183	0.00865412	0.440268	0.887763	Extratelencephalic L5 Neurons	0.669835
ARMH4	1.49796	0.017129	1.0745	2.08828	Extratelencephalic L5 Neurons	0.669835
FKBP5	0.676085	0.0697114	0.442892	1.03206	Extratelencephalic L5 Neurons	0.669835
ANGPT1	0.731302	0.0407277	0.541907	0.986891	Extratelencephalic L5 Neurons	0.669835
USP12	0.628451	0.0144223	0.433174	0.91176	Extratelencephalic L5 Neurons	0.669835
FKBP15	0.693293	0.0502506	0.48046	1.00041	Extratelencephalic L5 Neurons	0.669835
CNTN6	0.69737	0.0452651	0.490033	0.992435	Extratelencephalic L5 Neurons	0.669835
OGFRL1	1.66872	0.00367018	1.18128	2.3573	Extratelencephalic L5 Neurons	0.669835
PLXNA4	0.684721	0.0272512	0.48921	0.958367	Extratelencephalic L5 Neurons	0.669835
ISCA1	1.48374	0.059149	0.98487	2.23532	Extratelencephalic L5 Neurons	0.669835
USP22	1.41065	0.079576	0.96022	2.07237	Extratelencephalic L5 Neurons	0.669835
GALNT17	0.709517	0.0835351	0.48102	1.04656	Extratelencephalic L5 Neurons	0.669835
ZNF568	0.664069	0.0174342	0.47385	0.930646	Extratelencephalic L5 Neurons	0.669835
UHMK1	1.53015	0.026534	1.05078	2.22822	Extratelencephalic L5 Neurons	0.669835
SOD1	1.39464	0.0779523	0.963451	2.0188	Extratelencephalic L5 Neurons	0.669835
RAP1GAP2	0.625381	0.0208421	0.41999	0.931216	Extratelencephalic L5 Neurons	0.669835
IGIP	1.64751	0.0047597	1.16487	2.33013	Extratelencephalic L5 Neurons	0.669835
MARCH6	1.45789	0.0423826	1.01304	2.0981	Extratelencephalic L5 Neurons	0.669835
MTX3	1.39872	0.0532002	0.995375	1.9655	Extratelencephalic L5 Neurons	0.669835
CDIP1	1.46078	0.0588811	0.985874	2.16444	Extratelencephalic L5 Neurons	0.669835
ID2	1.52145	0.030877	1.03938	2.22711	Extratelencephalic L5 Neurons	0.669835
CCDC6	1.35613	0.0780334	0.966386	1.90306	Extratelencephalic L5 Neurons	0.669835
PRDX2	1.43062	0.0573458	0.988883	2.06969	Extratelencephalic L5 Neurons	0.669835
ALG5	0.691418	0.0454425	0.481647	0.992551	Extratelencephalic L5 Neurons	0.669835
AC009126.1	0.666201	0.0452858	0.447621	0.991517	Extratelencephalic L5 Neurons	0.669835
PHF24	1.56048	0.0135999	1.09587	2.22208	Extratelencephalic L5 Neurons	0.669835
ZNF236	0.643941	0.0299132	0.432802	0.958082	Extratelencephalic L5 Neurons	0.669835
CSGALNACT1	1.49607	0.0227082	1.0579	2.11573	Extratelencephalic L5 Neurons	0.669835
SNU13	1.43751	0.0582627	0.987378	2.09286	Extratelencephalic L5 Neurons	0.669835
CLCN4	1.44564	0.0695313	0.970976	2.15234	Extratelencephalic L5 Neurons	0.669835
ZNF770	1.51556	0.0281234	1.04562	2.19671	Extratelencephalic L5 Neurons	0.669835
SMARCA1	1.53282	0.03922	1.02133	2.30048	Extratelencephalic L5 Neurons	0.669835
MGMT	0.691224	0.0819852	0.455916	1.04798	Extratelencephalic L5 Neurons	0.669835
IRS1	0.68989	0.0620287	0.467139	1.01886	Extratelencephalic L5 Neurons	0.669835
HTR1E	0.7183	0.0690713	0.502788	1.02619	Extratelencephalic L5 Neurons	0.669835
TMEM50B	1.43261	0.0834209	0.953593	2.15226	Extratelencephalic L5 Neurons	0.669835
PARL	1.38909	0.0553748	0.992468	1.94422	Extratelencephalic L5 Neurons	0.669835
CRYZL1	0.727426	0.0715835	0.514564	1.02834	Extratelencephalic L5 Neurons	0.669835
TMEM248	1.42246	0.0563654	0.99048	2.04283	Extratelencephalic L5 Neurons	0.669835
PCBP2	1.64235	0.0104407	1.12346	2.40091	Extratelencephalic L5 Neurons	0.669835
RAP1GAP	1.58608	0.0254272	1.05837	2.37692	Extratelencephalic L5 Neurons	0.669835
NMNAT3	0.701626	0.0435086	0.497385	0.989733	Extratelencephalic L5 Neurons	0.669835
VPS4B	1.55047	0.0265151	1.05244	2.28417	Extratelencephalic L5 Neurons	0.669835
PIN1	1.38407	0.0790239	0.963019	1.98923	Extratelencephalic L5 Neurons	0.669835
SCAMP5	1.48891	0.0574404	0.987497	2.24493	Extratelencephalic L5 Neurons	0.669835
DNMT3A	0.668977	0.0432371	0.45303	0.987861	Extratelencephalic L5 Neurons	0.669835
DYNLT3	1.51086	0.0313567	1.0376	2.19998	Extratelencephalic L5 Neurons	0.669835
TMBIM6	1.47976	0.0523426	0.99603	2.19841	Extratelencephalic L5 Neurons	0.669835
ZNF133	0.614479	0.00865742	0.427179	0.883902	Extratelencephalic L5 Neurons	0.669835
ANXA4	0.696675	0.0549065	0.481679	1.00763	Extratelencephalic L5 Neurons	0.669835
MYLIP	1.52156	0.0128982	1.09295	2.11824	Extratelencephalic L5 Neurons	0.669835
SREK1	1.48662	0.0322676	1.0341	2.13715	Extratelencephalic L5 Neurons	0.669835
DYNLL1	1.56811	0.0343464	1.03372	2.37875	Extratelencephalic L5 Neurons	0.669835
HSPD1	1.53286	0.0282097	1.04667	2.24489	Extratelencephalic L5 Neurons	0.669835
PIP4K2B	1.4718	0.0584883	0.98621	2.19647	Extratelencephalic L5 Neurons	0.669835
NDUFB1	1.38548	0.0792599	0.96263	1.99408	Extratelencephalic L5 Neurons	0.669835
SELENOT	1.80884	0.00362941	1.21326	2.69679	Extratelencephalic L5 Neurons	0.669835
TMSB10	1.41449	0.0789737	0.960658	2.08271	Extratelencephalic L5 Neurons	0.669835
ARMC1	1.53071	0.0240753	1.05744	2.21581	Extratelencephalic L5 Neurons	0.669835
LONP1	1.63295	0.0119654	1.11398	2.39371	Extratelencephalic L5 Neurons	0.669835
DCTN1	1.45418	0.052241	0.996369	2.12236	Extratelencephalic L5 Neurons	0.669835
RBSN	1.55304	0.0373152	1.02619	2.35037	Extratelencephalic L5 Neurons	0.669835
TM2D3	1.42486	0.077635	0.961546	2.11143	Extratelencephalic L5 Neurons	0.669835
GAK	0.593943	0.00758188	0.405194	0.870614	Extratelencephalic L5 Neurons	0.669835
PDK3	1.50367	0.0369612	1.02498	2.20591	Extratelencephalic L5 Neurons	0.669835
CNTN4	0.673141	0.0399282	0.461442	0.981961	Extratelencephalic L5 Neurons	0.669835
SRSF2	1.42248	0.0705262	0.970914	2.08408	Extratelencephalic L5 Neurons	0.669835
LARGE1	0.632838	0.013262	0.440592	0.908966	Extratelencephalic L5 Neurons	0.669835
DLGAP2	0.699617	0.0301193	0.506569	0.966234	Extratelencephalic L5 Neurons	0.669835
DPP8	1.51257	0.0223829	1.06043	2.15751	Extratelencephalic L5 Neurons	0.669835
ADARB1	0.744464	0.0789753	0.535616	1.03475	Extratelencephalic L5 Neurons	0.669835
CABIN1	0.618749	0.0130012	0.423634	0.903727	Extratelencephalic L5 Neurons	0.669835
ABLIM3	0.70052	0.0663625	0.479068	1.02434	Extratelencephalic L5 Neurons	0.669835
NDFIP1	1.48913	0.0560188	0.989818	2.24032	Extratelencephalic L5 Neurons	0.669835
ACTR3	1.38177	0.0756072	0.967202	1.97402	Extratelencephalic L5 Neurons	0.669835
GYG2	0.708229	0.0355745	0.513397	0.977	Extratelencephalic L5 Neurons	0.669835
RAD21	1.40598	0.0839532	0.955325	2.06923	Extratelencephalic L5 Neurons	0.669835
SEL1L	1.39221	0.0800491	0.961153	2.01658	Extratelencephalic L5 Neurons	0.669835
SETX	0.683957	0.0668932	0.455585	1.02681	Extratelencephalic L5 Neurons	0.669835
TMEM246	1.59066	0.0222655	1.0684	2.36823	Extratelencephalic L5 Neurons	0.669835
SRGAP2B	0.637032	0.0342663	0.419604	0.967125	Extratelencephalic L5 Neurons	0.669835
SSH2	0.530099	0.00209585	0.353783	0.794286	Extratelencephalic L5 Neurons	0.669835
RNF214	0.658223	0.0323499	0.448774	0.965424	Extratelencephalic L5 Neurons	0.669835
PPID	1.38775	0.0815383	0.959787	2.00654	Extratelencephalic L5 Neurons	0.669835
ZNF718	1.36392	0.0474177	1.00354	1.85372	Extratelencephalic L5 Neurons	0.669835
CADM3	1.3968	0.0672729	0.97651	1.99799	Extratelencephalic L5 Neurons	0.669835
AP1AR	1.75194	0.0093225	1.148	2.6736	Extratelencephalic L5 Neurons	0.669835
ZHX1	1.37797	0.0562245	0.991521	1.91503	Extratelencephalic L5 Neurons	0.669835
HNRNPA3	1.60781	0.0253507	1.06037	2.43788	Extratelencephalic L5 Neurons	0.669835
SLC66A2	1.58157	0.0144871	1.09519	2.28397	Extratelencephalic L5 Neurons	0.669835
INPP5F	1.44534	0.0836091	0.952237	2.19378	Extratelencephalic L5 Neurons	0.669835
TMEM59	1.47078	0.0447675	1.00904	2.1438	Extratelencephalic L5 Neurons	0.669835
LRFN2	0.58062	0.00840555	0.387516	0.869951	Extratelencephalic L5 Neurons	0.669835
AHCYL1	1.54119	0.0196305	1.07166	2.21644	Extratelencephalic L5 Neurons	0.669835
DPYSL2	1.44274	0.052395	0.996204	2.08943	Extratelencephalic L5 Neurons	0.669835
SNX3	1.39646	0.0768759	0.964608	2.02165	Extratelencephalic L5 Neurons	0.669835
CYCS	1.52248	0.027498	1.0477	2.21242	Extratelencephalic L5 Neurons	0.669835
MORC3	0.718405	0.0404155	0.523611	0.985665	Extratelencephalic L5 Neurons	0.669835
AC074032.1	1.65519	0.025071	1.06508	2.57224	Extratelencephalic L5 Neurons	0.669835
GRIN3A	0.695425	0.0392565	0.492342	0.982277	Extratelencephalic L5 Neurons	0.669835
CNOT7	1.41498	0.0779535	0.961889	2.08151	Extratelencephalic L5 Neurons	0.669835
POLD3	0.545968	0.00176733	0.373605	0.797852	Extratelencephalic L5 Neurons	0.669835
RGS4	1.50982	0.0362903	1.02665	2.22038	Extratelencephalic L5 Neurons	0.669835
SDCBP	1.64778	0.00939791	1.13036	2.40206	Extratelencephalic L5 Neurons	0.669835
CKB	1.49182	0.0731774	0.96313	2.31071	Extratelencephalic L5 Neurons	0.669835
CLK4	0.53471	0.00469669	0.34644	0.825294	Extratelencephalic L5 Neurons	0.669835
TPGS2	1.42811	0.0504577	0.999283	2.04096	Extratelencephalic L5 Neurons	0.669835
DYNLL2	1.57037	0.0164438	1.08608	2.27062	Extratelencephalic L5 Neurons	0.669835
KLC1	1.47514	0.0371868	1.02335	2.12639	Extratelencephalic L5 Neurons	0.669835
CACYBP	1.58249	0.0107037	1.11239	2.25127	Extratelencephalic L5 Neurons	0.669835
GARS	1.41389	0.0406026	1.01492	1.96969	Extratelencephalic L5 Neurons	0.669835
ATMIN	1.38528	0.0760612	0.966409	1.9857	Extratelencephalic L5 Neurons	0.669835
ULK2	0.721339	0.0688556	0.507356	1.02557	Extratelencephalic L5 Neurons	0.669835
WDR70	0.707352	0.03616	0.511645	0.977918	Extratelencephalic L5 Neurons	0.669835
CSMD2	0.623696	0.017018	0.423228	0.919119	Extratelencephalic L5 Neurons	0.669835
NNT-AS1	1.69961	0.00985845	1.13607	2.54269	Extratelencephalic L5 Neurons	0.669835
SLC9A6	1.5294	0.0347362	1.03094	2.26887	Extratelencephalic L5 Neurons	0.669835
JADE1	1.36915	0.0573581	0.990224	1.89309	Extratelencephalic L5 Neurons	0.669835
COX6B1	1.38408	0.0816664	0.959958	1.99558	Extratelencephalic L5 Neurons	0.669835
GABRG3	0.74213	0.0681828	0.538626	1.02252	Extratelencephalic L5 Neurons	0.669835
ZZEF1	0.699544	0.0541909	0.486221	1.00646	Extratelencephalic L5 Neurons	0.669835
GNG3	1.42576	0.0440632	1.00947	2.01373	Extratelencephalic L5 Neurons	0.669835
CTSD	1.71102	0.0101604	1.13602	2.57706	Extratelencephalic L5 Neurons	0.669835
MCU	0.654155	0.0375441	0.438509	0.97585	Extratelencephalic L5 Neurons	0.669835
ELMOD3	1.61651	0.0119904	1.11138	2.35123	Extratelencephalic L5 Neurons	0.669835
KBTBD11	1.69757	0.00865259	1.14355	2.51999	Extratelencephalic L5 Neurons	0.669835
STAC2	1.41689	0.0641363	0.979734	2.04911	Extratelencephalic L5 Neurons	0.669835
CCDC171	0.688791	0.0372267	0.485016	0.978182	Extratelencephalic L5 Neurons	0.669835
MICAL2	0.7018	0.0416402	0.499168	0.986688	Extratelencephalic L5 Neurons	0.669835
PIBF1	0.734262	0.0781753	0.520684	1.03545	Extratelencephalic L5 Neurons	0.669835
ABCB9	0.674398	0.0805585	0.433535	1.04908	Extratelencephalic L5 Neurons	0.669835
CYFIP2	1.47977	0.0277469	1.04382	2.0978	Extratelencephalic L5 Neurons	0.669835
PGK1	1.73333	0.00318099	1.20268	2.49812	Extratelencephalic L5 Neurons	0.669835
EIF4H	1.5104	0.0367541	1.02569	2.22416	Extratelencephalic L5 Neurons	0.669835
MICU1	0.628965	0.0224896	0.422345	0.936668	Extratelencephalic L5 Neurons	0.669835
ADAMTSL3	0.612075	0.0218374	0.402333	0.93116	Extratelencephalic L5 Neurons	0.669835
BHLHE40	1.46576	0.0715092	0.96708	2.22158	Extratelencephalic L5 Neurons	0.669835
AKIRIN1	1.48504	0.0449719	1.0089	2.1859	Extratelencephalic L5 Neurons	0.669835
UBR4	0.685282	0.0449639	0.473611	0.991555	Extratelencephalic L5 Neurons	0.669835
PTMA	1.55217	0.0286552	1.04692	2.30126	Extratelencephalic L5 Neurons	0.669835
PTPN11	1.39568	0.0825565	0.957903	2.03354	Extratelencephalic L5 Neurons	0.669835
CTBP1	1.45553	0.0528488	0.995388	2.12839	Extratelencephalic L5 Neurons	0.669835
PCSK7	0.746026	0.0719291	0.542206	1.02646	Extratelencephalic L5 Neurons	0.669835
DLC1	0.682709	0.0375448	0.476452	0.978256	Extratelencephalic L5 Neurons	0.669835
GABARAP	1.45792	0.0323729	1.03218	2.05926	Extratelencephalic L5 Neurons	0.669835
ATP5MPL	1.48288	0.0544822	0.992445	2.21567	Extratelencephalic L5 Neurons	0.669835
ANKRD16	0.680352	0.0286308	0.481874	0.96058	Extratelencephalic L5 Neurons	0.669835
FLYWCH1	1.36361	0.0838182	0.959402	1.93812	Extratelencephalic L5 Neurons	0.669835
STX1A	1.72075	0.0379048	1.03076	2.8726	Extratelencephalic L5 Neurons	0.669835
SCN2B	1.48998	0.0587791	0.985306	2.25314	Extratelencephalic L5 Neurons	0.669835
FOXG1	1.56259	0.0411641	1.01806	2.39837	Extratelencephalic L5 Neurons	0.669835
ST6GALNAC5	0.735918	0.0735867	0.52595	1.02971	Extratelencephalic L5 Neurons	0.669835
PEBP1	1.49872	0.043566	1.01174	2.22009	Extratelencephalic L5 Neurons	0.669835
PFDN2	1.47774	0.0443798	1.00985	2.1624	Extratelencephalic L5 Neurons	0.669835
EMB	0.762036	0.0808093	0.561676	1.03387	Extratelencephalic L5 Neurons	0.669835
LRRC8C	1.49835	0.0252073	1.05155	2.13499	Extratelencephalic L5 Neurons	0.669835
SV2A	1.43818	0.0589356	0.98637	2.09696	Extratelencephalic L5 Neurons	0.669835
VEGFA	1.58782	0.0436768	1.01319	2.48836	Extratelencephalic L5 Neurons	0.669835
BRF1	1.42786	0.0226835	1.05108	1.93972	Extratelencephalic L5 Neurons	0.669835
PCF11	1.37699	0.0682162	0.976352	1.94203	Extratelencephalic L5 Neurons	0.669835
MAP1LC3B	1.48891	0.0380513	1.02218	2.16877	Extratelencephalic L5 Neurons	0.669835
SYT17	1.37501	0.0658461	0.979349	1.93051	Extratelencephalic L5 Neurons	0.669835
POU3F3	1.42505	0.0365894	1.02233	1.98642	Extratelencephalic L5 Neurons	0.669835
ZNF83	0.680712	0.0273928	0.483665	0.958035	Extratelencephalic L5 Neurons	0.669835
GCFC2	0.613189	0.00697035	0.429837	0.874751	Extratelencephalic L5 Neurons	0.669835
DIP2B	0.729188	0.074473	0.515373	1.03171	Extratelencephalic L5 Neurons	0.669835
ATP6AP1	1.61741	0.00997743	1.12195	2.33167	Extratelencephalic L5 Neurons	0.669835
PHTF1	0.735466	0.0701239	0.527418	1.02558	Extratelencephalic L5 Neurons	0.669835
SRP14	1.55986	0.0302463	1.04336	2.33206	Extratelencephalic L5 Neurons	0.669835
EIF4G2	1.48467	0.0591402	0.98486	2.23813	Extratelencephalic L5 Neurons	0.669835
FDFT1	1.66703	0.0191303	1.08712	2.55628	Extratelencephalic L5 Neurons	0.669835
MFN2	1.61207	0.0161658	1.0924	2.37895	Extratelencephalic L5 Neurons	0.669835
DNER	1.41903	0.0428952	1.01125	1.99125	Extratelencephalic L5 Neurons	0.669835
HSPE1	1.52191	0.0205476	1.06672	2.17135	Extratelencephalic L5 Neurons	0.669835
GPR137B	1.58508	0.0191506	1.07813	2.3304	Extratelencephalic L5 Neurons	0.669835
TM6SF1	1.48484	0.0637059	0.977703	2.25504	Extratelencephalic L5 Neurons	0.669835
RAB7A	1.65718	0.00421822	1.17248	2.34227	Extratelencephalic L5 Neurons	0.669835
CLPTM1	1.45132	0.0394501	1.01815	2.06878	Extratelencephalic L5 Neurons	0.669835
CCND2	1.40076	0.0787713	0.961987	2.03967	Extratelencephalic L5 Neurons	0.669835
GOLGA2	1.48492	0.0388063	1.02054	2.16061	Extratelencephalic L5 Neurons	0.669835
CHSY1	0.605319	0.022662	0.393091	0.93213	Extratelencephalic L5 Neurons	0.669835
CAPN1	1.43335	0.0721456	0.968125	2.12214	Extratelencephalic L5 Neurons	0.669835
SNCA	1.37274	0.085217	0.956995	1.96909	Extratelencephalic L5 Neurons	0.669835
GNB1	1.45451	0.056754	0.989281	2.13851	Extratelencephalic L5 Neurons	0.669835
TBR1	1.57502	0.0249616	1.0588	2.34292	Extratelencephalic L5 Neurons	0.669835
GOLM1	1.47814	0.0254283	1.04923	2.08239	Extratelencephalic L5 Neurons	0.669835
CEND1	1.6131	0.0173109	1.08805	2.39152	Extratelencephalic L5 Neurons	0.669835
MIPEP	0.710909	0.0838555	0.482842	1.0467	Extratelencephalic L5 Neurons	0.669835
MTUS2	0.679923	0.0411241	0.469536	0.984579	Extratelencephalic L5 Neurons	0.669835
KLHDC3	1.48242	0.0203322	1.06302	2.0673	Extratelencephalic L5 Neurons	0.669835
LHFPL4	0.640618	0.0317977	0.426618	0.961966	Extratelencephalic L5 Neurons	0.669835
KCNMB4	0.575281	0.00299179	0.399339	0.828741	Extratelencephalic L5 Neurons	0.669835
NECAP1	1.78202	0.00365215	1.20704	2.63087	Extratelencephalic L5 Neurons	0.669835
SELENOH	1.40007	0.0773225	0.963796	2.03382	Extratelencephalic L5 Neurons	0.669835
ST3GAL1	0.742002	0.0670702	0.539131	1.02121	Extratelencephalic L5 Neurons	0.669835
RPS19	1.42001	0.0723863	0.968627	2.08174	Extratelencephalic L5 Neurons	0.669835
LGALS1	1.38798	0.0822404	0.958954	2.00894	Extratelencephalic L5 Neurons	0.669835
CBFA2T2	0.750158	0.0649667	0.552789	1.018	Extratelencephalic L5 Neurons	0.669835
RNF187	1.46799	0.0501974	0.999662	2.15572	Extratelencephalic L5 Neurons	0.669835
PPP2CB	1.91969	0.00214451	1.26583	2.91131	Extratelencephalic L5 Neurons	0.669835
ENO1	1.42397	0.0577917	0.988383	2.05151	Extratelencephalic L5 Neurons	0.669835
SNTG1	0.568978	0.0104507	0.369514	0.876113	Extratelencephalic L5 Neurons	0.669835
DMGDH	1.54944	0.0405388	1.01904	2.35591	Extratelencephalic L5 Neurons	0.669835
ARL6IP1	1.43862	0.0694842	0.971418	2.13053	Extratelencephalic L5 Neurons	0.669835
AL354740.1	0.688461	0.0575211	0.468361	1.012	Extratelencephalic L5 Neurons	0.669835
CCDC85A	0.750339	0.0792658	0.544428	1.03413	Extratelencephalic L5 Neurons	0.669835
TMEM33	1.42735	0.0765412	0.962764	2.11611	Extratelencephalic L5 Neurons	0.669835
KYAT3	0.667751	0.0312807	0.462367	0.964367	Extratelencephalic L5 Neurons	0.669835
OCA2	0.683337	0.0515351	0.465763	1.00255	Extratelencephalic L5 Neurons	0.669835
CDHR3	0.707222	0.0218187	0.526002	0.950875	Extratelencephalic L5 Neurons	0.669835
PDE4B	1.43077	0.0755636	0.963789	2.124	Extratelencephalic L5 Neurons	0.669835
SERINC3	1.61132	0.0260562	1.05854	2.45278	Extratelencephalic L5 Neurons	0.669835
SLC35F3	0.687816	0.0418988	0.479621	0.986385	Extratelencephalic L5 Neurons	0.669835
AC107398.3	1.51425	0.0176071	1.07501	2.13298	Extratelencephalic L5 Neurons	0.669835
RANBP6	1.56428	0.0169149	1.08359	2.2582	Extratelencephalic L5 Neurons	0.669835
NAT8L	1.62934	0.0254161	1.06191	2.49998	Extratelencephalic L5 Neurons	0.669835
UQCR11	1.49102	0.0509279	0.998382	2.22674	Extratelencephalic L5 Neurons	0.669835
MYO9A	0.666234	0.0308112	0.460837	0.963177	Extratelencephalic L5 Neurons	0.669835
NUDT3	1.52904	0.0235688	1.05869	2.20834	Extratelencephalic L5 Neurons	0.669835
ATP6V1B2	1.51786	0.0601555	0.98232	2.34536	Extratelencephalic L5 Neurons	0.669835
MYL6	1.43101	0.0482845	1.0027	2.04227	Extratelencephalic L5 Neurons	0.669835
NOS1AP	0.725477	0.0724803	0.511126	1.02972	Extratelencephalic L5 Neurons	0.669835
WSCD2	0.757793	0.0577143	0.569059	1.00912	Extratelencephalic L5 Neurons	0.669835
FARS2	0.590016	0.00810324	0.399249	0.871932	Extratelencephalic L5 Neurons	0.669835
DENND10	1.52726	0.0467489	1.0061	2.31838	Extratelencephalic L5 Neurons	0.669835
DNAJA2	1.36282	0.0652279	0.980662	1.89389	Extratelencephalic L5 Neurons	0.669835
MYL12B	1.52345	0.028097	1.04627	2.21826	Extratelencephalic L5 Neurons	0.669835
RHOQ	1.42017	0.0350457	1.02491	1.96788	Extratelencephalic L5 Neurons	0.669835
RIMS1	0.633654	0.0130806	0.441927	0.908561	Extratelencephalic L5 Neurons	0.669835
RNF10	1.40293	0.0657246	0.978219	2.01204	Extratelencephalic L5 Neurons	0.669835
TGOLN2	1.49929	0.0412223	1.01626	2.21192	Extratelencephalic L5 Neurons	0.669835
AHNAK2	1.43337	0.0383173	1.01956	2.01513	Extratelencephalic L5 Neurons	0.669835
GABARAPL1	1.39096	0.0859168	0.954443	2.02711	Extratelencephalic L5 Neurons	0.669835
KIF3C	1.38462	0.053241	0.995458	1.92591	Extratelencephalic L5 Neurons	0.669835
TCP1	1.71008	0.00450237	1.18097	2.47625	Extratelencephalic L5 Neurons	0.669835
DNAJA1	1.66336	0.0158026	1.10032	2.5145	Extratelencephalic L5 Neurons	0.669835
ATP5MF	1.38894	0.0838874	0.956965	2.01592	Extratelencephalic L5 Neurons	0.669835
DNMBP	0.696131	0.0378011	0.494588	0.979802	Extratelencephalic L5 Neurons	0.669835
MAPK8IP2	1.62412	0.0325236	1.04118	2.53343	Extratelencephalic L5 Neurons	0.669835
CMAS	1.40641	0.0757695	0.965238	2.04924	Extratelencephalic L5 Neurons	0.669835
WIPI2	1.37409	0.0711277	0.973016	1.94048	Extratelencephalic L5 Neurons	0.669835
EFCAB5	0.610143	0.00361708	0.437421	0.851067	Extratelencephalic L5 Neurons	0.669835
HSPA9	1.46845	0.0407271	1.01634	2.1217	Extratelencephalic L5 Neurons	0.669835
GATAD2B	0.603344	0.0119369	0.406898	0.894631	Extratelencephalic L5 Neurons	0.669835
NCDN	1.40077	0.0746204	0.967055	2.02901	Extratelencephalic L5 Neurons	0.669835
HS6ST3	0.72007	0.0678074	0.506182	1.02434	Extratelencephalic L5 Neurons	0.669835
UGCG	1.56689	0.0218068	1.06752	2.29985	Extratelencephalic L5 Neurons	0.669835
BLCAP	1.45586	0.0480678	1.00319	2.11277	Extratelencephalic L5 Neurons	0.669835
VAPA	1.55347	0.0183986	1.0771	2.24052	Extratelencephalic L5 Neurons	0.669835
PDE1A	0.71002	0.0551782	0.500314	1.00762	Extratelencephalic L5 Neurons	0.669835
CBX6	1.62039	0.0226951	1.0698	2.45434	Extratelencephalic L5 Neurons	0.669835
PPP1CB	1.41456	0.0591508	0.986686	2.02797	Extratelencephalic L5 Neurons	0.669835
TAGLN3	1.48446	0.0592741	0.984652	2.23798	Extratelencephalic L5 Neurons	0.669835
SELENOW	1.4837	0.0415127	1.01528	2.16822	Extratelencephalic L5 Neurons	0.669835
AP3B1	0.643773	0.0363952	0.426162	0.972501	Extratelencephalic L5 Neurons	0.669835
SEZ6L	0.715653	0.0651054	0.501545	1.02116	Extratelencephalic L5 Neurons	0.669835
NAPB	1.39843	0.0737294	0.968313	2.01959	Extratelencephalic L5 Neurons	0.669835
MEST	1.42241	0.0792032	0.959749	2.10809	Extratelencephalic L5 Neurons	0.669835
CREBRF	1.79198	0.00108766	1.26281	2.54287	Extratelencephalic L5 Neurons	0.669835
FBXL5	0.744582	0.0633264	0.545397	1.01651	Extratelencephalic L5 Neurons	0.669835
GSTO2	1.59724	0.00603339	1.14343	2.23117	Extratelencephalic L5 Neurons	0.669835
KLF9	1.38204	0.0755088	0.967298	1.9746	Extratelencephalic L5 Neurons	0.669835
RRM2B	1.38107	0.0834093	0.958236	1.99047	Extratelencephalic L5 Neurons	0.669835
GMDS-DT	0.664665	0.0153561	0.4777	0.924806	Extratelencephalic L5 Neurons	0.669835
CANX	1.39461	0.0648364	0.979741	1.98516	Extratelencephalic L5 Neurons	0.669835
LINC02822	0.682694	0.0338623	0.47983	0.971327	Extratelencephalic L5 Neurons	0.669835
PAIP2	1.50028	0.0132702	1.08828	2.06827	Extratelencephalic L5 Neurons	0.669835
BZW1	1.52689	0.0365259	1.02687	2.27037	Extratelencephalic L5 Neurons	0.669835
C3orf14	1.42353	0.0840994	0.953557	2.12514	Extratelencephalic L5 Neurons	0.669835
ZMAT3	1.44724	0.0502328	0.999618	2.09529	Extratelencephalic L5 Neurons	0.669835
EIF1AX	1.52156	0.0350816	1.0298	2.24817	Extratelencephalic L5 Neurons	0.669835
MCM3AP	0.746172	0.0855357	0.534425	1.04182	Extratelencephalic L5 Neurons	0.669835
GAPDH	1.36903	0.0819223	0.960994	1.95032	Extratelencephalic L5 Neurons	0.669835
ELOB	1.47358	0.0603447	0.983271	2.20839	Extratelencephalic L5 Neurons	0.669835
EIF2S2	1.43685	0.0491276	1.00138	2.0617	Extratelencephalic L5 Neurons	0.669835
SNRNP70	1.83399	0.0483753	1.00433	3.34903	Extratelencephalic L5 Neurons	0.669835
EXOC6B	0.682744	0.0693125	0.452283	1.03064	Extratelencephalic L5 Neurons	0.669835
FBXL16	1.484	0.0290034	1.04122	2.11506	Extratelencephalic L5 Neurons	0.669835
COX7A2	1.43348	0.0449949	1.00806	2.03843	Extratelencephalic L5 Neurons	0.669835
MOB4	1.56592	0.0155657	1.08881	2.25209	Extratelencephalic L5 Neurons	0.669835
B4GAT1	1.41692	0.0658871	0.97737	2.05414	Extratelencephalic L5 Neurons	0.669835
ETF1	1.35502	0.0636653	0.982868	1.86809	Extratelencephalic L5 Neurons	0.669835
NCOA5	0.709424	0.061466	0.495047	1.01663	Extratelencephalic L5 Neurons	0.669835
ETS2	1.37676	0.052815	0.996116	1.90286	Extratelencephalic L5 Neurons	0.669835
MRPS30-DT	0.652609	0.0320877	0.441732	0.964156	Extratelencephalic L5 Neurons	0.669835
IQCJ-SCHIP1	0.742442	0.0718488	0.536827	1.02681	Extratelencephalic L5 Neurons	0.669835
WDR59	1.42523	0.0667469	0.975824	2.08161	Extratelencephalic L5 Neurons	0.669835
WWOX	0.678524	0.0649898	0.449431	1.02439	Extratelencephalic L5 Neurons	0.669835
BAALC-AS1	1.43326	0.0847432	0.951876	2.15808	Extratelencephalic L5 Neurons	0.669835
CALM2	1.45556	0.0797417	0.956455	2.2151	Extratelencephalic L5 Neurons	0.669835
SGPP1	0.622821	0.0112089	0.431956	0.898021	Extratelencephalic L5 Neurons	0.669835
TMF1	1.45432	0.0482178	1.00293	2.10887	Extratelencephalic L5 Neurons	0.669835
ABL2	0.721851	0.0566326	0.516292	1.00925	Extratelencephalic L5 Neurons	0.669835
C9orf85	0.724811	0.0689658	0.512372	1.02533	Extratelencephalic L5 Neurons	0.669835
ZNF708	0.791434	0.083859	0.60707	1.03179	Extratelencephalic L5 Neurons	0.669835
RBM39	1.61042	0.0104598	1.11819	2.31932	Extratelencephalic L5 Neurons	0.669835
COX16	1.43184	0.061375	0.983027	2.08555	Extratelencephalic L5 Neurons	0.669835
DKK3	1.47284	0.0477391	1.00386	2.16091	Extratelencephalic L5 Neurons	0.669835
NSMCE2	0.644969	0.0168558	0.450126	0.924152	Extratelencephalic L5 Neurons	0.669835
POU2F1	0.679767	0.0741207	0.445015	1.03835	Extratelencephalic L5 Neurons	0.669835
CUL5	1.58803	0.0418069	1.01729	2.47898	Extratelencephalic L5 Neurons	0.669835
TNIK	1.48579	0.017747	1.07102	2.06119	Extratelencephalic L5 Neurons	0.669835
SMG6	0.650814	0.0253412	0.446634	0.948336	Extratelencephalic L5 Neurons	0.669835
IMMP2L	0.737666	0.0700715	0.530741	1.02527	Extratelencephalic L5 Neurons	0.669835
SEC23A	1.45432	0.0824925	0.952915	2.21957	Extratelencephalic L5 Neurons	0.669835
BEX2	1.42854	0.0642587	0.979093	2.08431	Extratelencephalic L5 Neurons	0.669835
MAP9	1.40881	0.0775708	0.962832	2.06137	Extratelencephalic L5 Neurons	0.669835
ZNF652	0.634748	0.0246034	0.427031	0.943503	Extratelencephalic L5 Neurons	0.669835
MSMO1	1.70461	0.012276	1.12287	2.58773	Extratelencephalic L5 Neurons	0.669835
WDR27	0.544176	0.00324288	0.362901	0.816	Extratelencephalic L5 Neurons	0.669835
CFAP61	0.695632	0.0856283	0.459889	1.05222	Extratelencephalic L5 Neurons	0.669835
KCNN2	0.70047	0.0539172	0.487721	1.00602	Extratelencephalic L5 Neurons	0.669835
ARHGAP5	1.52668	0.0467028	1.00618	2.31642	Extratelencephalic L5 Neurons	0.669835
DUSP3	1.56536	0.00973153	1.11447	2.19868	Extratelencephalic L5 Neurons	0.669835
COPS8	1.73357	0.00859413	1.15006	2.61313	Extratelencephalic L5 Neurons	0.669835
GABBR1	1.41176	0.0695131	0.972841	2.0487	Extratelencephalic L5 Neurons	0.669835
CLSTN1	1.46154	0.049355	1.00106	2.13383	Extratelencephalic L5 Neurons	0.669835
ALDOC	1.55892	0.0180264	1.07901	2.25228	Extratelencephalic L5 Neurons	0.669835
ASPHD1	1.41697	0.0756002	0.964704	2.08127	Extratelencephalic L5 Neurons	0.669835
DHX30	1.43706	0.0382149	1.01988	2.02486	Extratelencephalic L5 Neurons	0.669835
SCN4B	1.42115	0.0739494	0.966531	2.08961	Extratelencephalic L5 Neurons	0.669835
ARL8B	1.61378	0.0108093	1.1169	2.33171	Extratelencephalic L5 Neurons	0.669835
SCLY	0.75402	0.0643888	0.559034	1.01702	Extratelencephalic L5 Neurons	0.669835
SPCS3	1.43862	0.0504742	0.999242	2.07119	Extratelencephalic L5 Neurons	0.669835
C6orf62	1.57014	0.0169657	1.08413	2.27402	Extratelencephalic L5 Neurons	0.669835
KHDRBS2-OT	0.705389	0.0763738	0.479499	1.03769	Extratelencephalic L5 Neurons	0.669835
MPZL1	0.673438	0.0276575	0.473667	0.957463	Extratelencephalic L5 Neurons	0.669835
MAP4	1.55365	0.0298785	1.04389	2.31234	Extratelencephalic L5 Neurons	0.669835
MTCL1	0.748626	0.0767722	0.543264	1.03162	Extratelencephalic L5 Neurons	0.669835
NUMA1	1.40544	0.0782556	0.962248	2.05275	Extratelencephalic L5 Neurons	0.669835
RBFOX3	0.584571	0.00492384	0.402085	0.849877	Extratelencephalic L5 Neurons	0.669835
PRUNE2	0.67142	0.0267039	0.472022	0.95505	Extratelencephalic L5 Neurons	0.669835
KIAA1841	0.689235	0.0550158	0.471259	1.00803	Extratelencephalic L5 Neurons	0.669835
ITM2C	1.72227	0.00624395	1.1665	2.54284	Extratelencephalic L5 Neurons	0.669835
AC105180.2	0.63049	0.0155512	0.433896	0.916158	Extratelencephalic L5 Neurons	0.669835
SIRPA	1.65324	0.0135982	1.10897	2.46463	Extratelencephalic L5 Neurons	0.669835
TCERG1	1.4736	0.0799675	0.954748	2.27441	Extratelencephalic L5 Neurons	0.669835
CCBE1	0.708568	0.0526476	0.500091	1.00395	Extratelencephalic L5 Neurons	0.669835
NDUFB4	1.42474	0.0623366	0.981913	2.06728	Extratelencephalic L5 Neurons	0.669835
CEMIP2	0.714245	0.0598174	0.503093	1.01402	Extratelencephalic L5 Neurons	0.669835
FAAH2	0.606219	0.0195472	0.398256	0.922775	Extratelencephalic L5 Neurons	0.669835
PFN2	1.50203	0.044278	1.01046	2.23273	Extratelencephalic L5 Neurons	0.669835
CISD1	1.49179	0.0298345	1.03986	2.14013	Extratelencephalic L5 Neurons	0.669835
LINC00632	0.725661	0.0444423	0.530792	0.992071	Extratelencephalic L5 Neurons	0.669835
AP3B2	0.739663	0.0358333	0.558123	0.980253	Extratelencephalic L5 Neurons	0.669835
RFK	1.38693	0.0840189	0.957	2.00999	Extratelencephalic L5 Neurons	0.669835
DLAT	1.43214	0.0542828	0.99341	2.06462	Extratelencephalic L5 Neurons	0.669835
CNIH1	1.40335	0.0423793	1.01172	1.94659	Extratelencephalic L5 Neurons	0.669835
EPHB2	0.671844	0.0510266	0.450571	1.00178	Extratelencephalic L5 Neurons	0.669835
SERF2	1.64228	0.013268	1.10901	2.432	Extratelencephalic L5 Neurons	0.669835
RALGPS2	0.700783	0.0606462	0.483346	1.01603	Extratelencephalic L5 Neurons	0.669835
MTPN	1.46931	0.044515	1.00947	2.13863	Extratelencephalic L5 Neurons	0.669835
RAB3A	1.38609	0.0759049	0.966536	1.98776	Extratelencephalic L5 Neurons	0.669835
OLA1	0.734143	0.0752173	0.522297	1.03192	Extratelencephalic L5 Neurons	0.669835
TNFRSF19	0.665387	0.0389531	0.45198	0.979557	Extratelencephalic L5 Neurons	0.669835
CMYA5	1.39682	0.0516989	0.997535	1.95593	Extratelencephalic L5 Neurons	0.669835
JOSD1	1.52286	0.0259136	1.05181	2.20487	Extratelencephalic L5 Neurons	0.669835
STX18	0.653732	0.0732623	0.410584	1.04087	Extratelencephalic L5 Neurons	0.669835
COPB2	1.45599	0.0763802	0.960945	2.20606	Extratelencephalic L5 Neurons	0.669835
PPIA	1.43719	0.0461144	1.00627	2.05266	Extratelencephalic L5 Neurons	0.669835
ARL4C	1.43914	0.0366641	1.02282	2.02493	Extratelencephalic L5 Neurons	0.669835
USP7	1.44219	0.0455819	1.00721	2.06502	Extratelencephalic L5 Neurons	0.669835
HDX	0.53794	0.00779968	0.340701	0.849365	Extratelencephalic L5 Neurons	0.669835
AP2A1	1.83921	0.00109663	1.27569	2.65164	Extratelencephalic L5 Neurons	0.669835
NYAP2	0.620218	0.0173077	0.41851	0.919142	Extratelencephalic L5 Neurons	0.669835
KMT5B	0.74422	0.0806412	0.534266	1.03668	Extratelencephalic L5 Neurons	0.669835
LONRF2	1.58712	0.0474348	1.00523	2.50585	Extratelencephalic L5 Neurons	0.669835
MTERF4	0.747905	0.0852002	0.537275	1.04111	Extratelencephalic L5 Neurons	0.669835
KSR2	0.640306	0.0135331	0.449485	0.912135	Extratelencephalic L5 Neurons	0.669835
PITHD1	1.54618	0.030372	1.04217	2.29394	Extratelencephalic L5 Neurons	0.669835
HERC2	0.729042	0.0565566	0.52683	1.00887	Extratelencephalic L5 Neurons	0.669835
ARPP19	1.45939	0.0666828	0.974322	2.18594	Extratelencephalic L5 Neurons	0.669835
AC110023.1	0.719283	0.0514545	0.51629	1.00209	Extratelencephalic L5 Neurons	0.669835
PLEKHA2	1.32792	0.078338	0.968357	1.82099	Extratelencephalic L5 Neurons	0.669835
HIVEP3	0.623796	0.0267922	0.410811	0.947202	Extratelencephalic L5 Neurons	0.669835
RETREG2	1.64059	0.0163723	1.0951	2.45779	Extratelencephalic L5 Neurons	0.669835
FAM192A	1.81599	0.0097496	1.15509	2.85502	Extratelencephalic L5 Neurons	0.669835
CLDND1	1.57963	0.021112	1.071	2.3298	Extratelencephalic L5 Neurons	0.669835
LMBRD2	1.48183	0.0486495	1.00233	2.19074	Extratelencephalic L5 Neurons	0.669835
ENOX1	0.660515	0.0189789	0.467087	0.934045	Extratelencephalic L5 Neurons	0.669835
MSANTD4	1.41231	0.0403746	1.01525	1.96466	Extratelencephalic L5 Neurons	0.669835
SERP2	1.45153	0.0704171	0.969423	2.17341	Extratelencephalic L5 Neurons	0.669835
PSAP	1.40791	0.0754741	0.965499	2.05305	Extratelencephalic L5 Neurons	0.669835
HSD17B12	1.44987	0.0297356	1.03718	2.02678	Extratelencephalic L5 Neurons	0.669835
OTUB1	1.43837	0.063875	0.979238	2.11279	Extratelencephalic L5 Neurons	0.669835
COLGALT2	0.751197	0.08157	0.544415	1.03652	Extratelencephalic L5 Neurons	0.669835
TMEM59L	1.67554	0.0228569	1.07425	2.61339	Extratelencephalic L5 Neurons	0.669835
WBP11	1.51108	0.0646248	0.975255	2.3413	Extratelencephalic L5 Neurons	0.669835
ERVMER61-1	0.765042	0.0820159	0.565714	1.0346	Extratelencephalic L5 Neurons	0.669835
VTA1	1.31245	0.070952	0.977048	1.76298	Extratelencephalic L5 Neurons	0.669835
PLEKHB2	1.38089	0.0752618	0.967672	1.97056	Extratelencephalic L5 Neurons	0.669835
KIF16B	0.663649	0.0497329	0.440638	0.999529	Extratelencephalic L5 Neurons	0.669835
DCTN2	1.42007	0.0654189	0.97786	2.06227	Extratelencephalic L5 Neurons	0.669835
RAD23A	1.36804	0.0723117	0.972003	1.92543	Extratelencephalic L5 Neurons	0.669835
AC012291.3	0.714493	0.0775087	0.491922	1.03777	Extratelencephalic L5 Neurons	0.669835
WWC2	1.50435	0.0144496	1.0845	2.08673	Extratelencephalic L5 Neurons	0.669835
GNA14	1.49786	0.0168963	1.07524	2.08658	Extratelencephalic L5 Neurons	0.669835
BNIP3	1.62713	0.0204702	1.07801	2.45596	Extratelencephalic L5 Neurons	0.669835
SLITRK4	1.48359	0.0554392	0.990861	2.22135	Extratelencephalic L5 Neurons	0.669835
DHCR24	1.7251	0.00563297	1.17261	2.53791	Extratelencephalic L5 Neurons	0.669835
ANXA7	1.7095	0.0172065	1.09971	2.65744	Extratelencephalic L5 Neurons	0.669835
KCNH3	1.61932	0.0520216	0.99578	2.63332	Extratelencephalic L5 Neurons	0.669835
PRNP	1.60372	0.0331996	1.03835	2.47693	Extratelencephalic L5 Neurons	0.669835
LGI1	1.43124	0.0221269	1.05277	1.94578	Extratelencephalic L5 Neurons	0.669835
PRDX3	1.61814	0.0105326	1.11906	2.3398	Extratelencephalic L5 Neurons	0.669835
MTM1	1.37734	0.0644384	0.980988	1.93383	Extratelencephalic L5 Neurons	0.669835
FGF14	0.733179	0.067555	0.525635	1.02267	Extratelencephalic L5 Neurons	0.669835
EIF2B3	0.70556	0.0413439	0.504676	0.986406	Extratelencephalic L5 Neurons	0.669835
RPL22	1.47067	0.0426161	1.01292	2.1353	Extratelencephalic L5 Neurons	0.669835
COX10	0.738042	0.0746069	0.528514	1.03064	Extratelencephalic L5 Neurons	0.669835
DGCR2	1.45602	0.0528067	0.995451	2.12969	Extratelencephalic L5 Neurons	0.669835
ZBTB7A	1.72287	0.00544793	1.17393	2.52849	Extratelencephalic L5 Neurons	0.669835
THUMPD1	1.74927	0.00550477	1.17864	2.59616	Extratelencephalic L5 Neurons	0.669835
PRRC2C	0.672343	0.0648546	0.441123	1.02476	Extratelencephalic L5 Neurons	0.669835
AZIN1	1.57038	0.0296806	1.04549	2.35878	Extratelencephalic L5 Neurons	0.669835
CALN1	0.76244	0.075834	0.565149	1.02861	Extratelencephalic L5 Neurons	0.669835
SLC22A15	0.668136	0.0385168	0.456018	0.978923	Extratelencephalic L5 Neurons	0.669835
PAFAH1B2	1.42842	0.0599515	0.985165	2.07112	Extratelencephalic L5 Neurons	0.669835
CAPZA2	1.37398	0.0683187	0.976388	1.93346	Extratelencephalic L5 Neurons	0.669835
PAIP1	1.62121	0.0124317	1.10995	2.36798	Extratelencephalic L5 Neurons	0.669835
LINC01278	0.765061	0.0837449	0.564783	1.03636	Extratelencephalic L5 Neurons	0.669835
AC034111.2	0.516325	0.00058356	0.354255	0.752542	Extratelencephalic L5 Neurons	0.669835
PNMA8A	1.54203	0.0318304	1.03835	2.29004	Extratelencephalic L5 Neurons	0.669835
NETO2	0.725326	0.058843	0.51982	1.01208	Extratelencephalic L5 Neurons	0.669835
SIN3B	1.7384	0.0378608	1.03147	2.92983	Extratelencephalic L5 Neurons	0.669835
IMPAD1	1.39598	0.0816952	0.958892	2.0323	Extratelencephalic L5 Neurons	0.669835
SUMO2	1.47089	0.0438578	1.01067	2.14069	Extratelencephalic L5 Neurons	0.669835
PCMT1	1.45363	0.0429799	1.01188	2.08822	Extratelencephalic L5 Neurons	0.669835
ARHGEF10	1.36468	0.0801778	0.963311	1.93327	Extratelencephalic L5 Neurons	0.669835
PNMA2	1.58367	0.0177188	1.08303	2.31574	Extratelencephalic L5 Neurons	0.669835
ATF7IP2	0.566543	0.00378066	0.38567	0.832241	Extratelencephalic L5 Neurons	0.669835
RFXAP	0.678465	0.0502284	0.460134	1.00039	Extratelencephalic L5 Neurons	0.669835
KCNJ6	0.651667	0.0181593	0.4568	0.929662	Extratelencephalic L5 Neurons	0.669835
TTTY14	0.0606244	0.055623	0.00343577	1.06972	Extratelencephalic L5 Neurons	0.669835
EIF1B	1.58069	0.0286475	1.04893	2.38204	Extratelencephalic L5 Neurons	0.669835
CBX5	1.62953	0.00734639	1.14028	2.32868	Extratelencephalic L5 Neurons	0.669835
GRIK4	0.739809	0.0752369	0.530792	1.03113	Extratelencephalic L5 Neurons	0.669835
CCSER1	0.747383	0.0756662	0.542022	1.03055	Extratelencephalic L5 Neurons	0.669835
TOX2	0.635962	0.00790694	0.45538	0.888154	Extratelencephalic L5 Neurons	0.669835
FAM153A	0.712186	0.0795919	0.487289	1.04088	Extratelencephalic L5 Neurons	0.669835
HEATR5A	0.663143	0.0721919	0.42377	1.03773	Extratelencephalic L5 Neurons	0.669835
PRKACA	1.469	0.047673	1.00394	2.14947	Extratelencephalic L5 Neurons	0.669835
KLHL29	0.616152	0.0184231	0.411907	0.921671	Extratelencephalic L5 Neurons	0.669835
EIF4E	1.41075	0.0844626	0.954279	2.08558	Extratelencephalic L5 Neurons	0.669835
NUP93	0.719384	0.056052	0.513128	1.00855	Extratelencephalic L5 Neurons	0.669835
FEZ1	1.40199	0.0850058	0.954448	2.05938	Extratelencephalic L5 Neurons	0.669835
MTMR9	1.41345	0.0631174	0.981253	2.036	Extratelencephalic L5 Neurons	0.669835
ATP6V0D1	1.55991	0.0177682	1.08002	2.25302	Extratelencephalic L5 Neurons	0.669835
C11orf54	1.38486	0.0687761	0.975244	1.96651	Extratelencephalic L5 Neurons	0.669835
METTL14	1.58033	0.00602529	1.14001	2.19072	Extratelencephalic L5 Neurons	0.669835
ATP5MC3	1.50909	0.0374237	1.02424	2.22346	Extratelencephalic L5 Neurons	0.669835
ATP8A2	0.684586	0.0251193	0.49136	0.953798	Extratelencephalic L5 Neurons	0.669835
PTK2	0.771031	0.0569477	0.589936	1.00772	Extratelencephalic L5 Neurons	0.669835
RMND5A	1.49186	0.0535558	0.993888	2.23934	Extratelencephalic L5 Neurons	0.669835
IGSF21	0.723967	0.0328814	0.538081	0.974071	Extratelencephalic L5 Neurons	0.669835
TOR1AIP2	0.780235	0.0754569	0.593467	1.02578	Extratelencephalic L5 Neurons	0.669835
EEF2	1.52032	0.0442705	1.01079	2.2867	Extratelencephalic L5 Neurons	0.669835
TMEM106B	1.43568	0.0720735	0.96808	2.12913	Extratelencephalic L5 Neurons	0.669835
DNAJC8	1.55177	0.0146075	1.09059	2.20795	Extratelencephalic L5 Neurons	0.669835
ITSN2	1.42257	0.051028	0.99842	2.0269	Extratelencephalic L5 Neurons	0.669835
CAP1	1.39358	0.0726345	0.969978	2.00217	Extratelencephalic L5 Neurons	0.669835
ASIC2	0.732328	0.0617266	0.528162	1.01542	Extratelencephalic L5 Neurons	0.669835
TANK	0.59467	0.0127776	0.394995	0.895284	Extratelencephalic L5 Neurons	0.669835
CCNI	1.54725	0.0188369	1.07492	2.22714	Extratelencephalic L5 Neurons	0.669835
LINC00923	0.568758	0.00243905	0.394858	0.819246	Extratelencephalic L5 Neurons	0.669835
RNF145	1.57856	0.00704284	1.13256	2.2002	Extratelencephalic L5 Neurons	0.669835
ATF1	0.608375	0.0409799	0.377733	0.979845	Extratelencephalic L5 Neurons	0.669835
XRCC6	1.41677	0.0821177	0.95659	2.09833	Extratelencephalic L5 Neurons	0.669835
PCNP	1.40722	0.0313494	1.03104	1.92064	Extratelencephalic L5 Neurons	0.669835
VTI1B	1.39847	0.0572208	0.989757	1.97597	Extratelencephalic L5 Neurons	0.669835
CTNNA1	1.30126	0.0814485	0.967639	1.74989	Extratelencephalic L5 Neurons	0.669835
TEX2	1.37797	0.066623	0.978252	1.941	Extratelencephalic L5 Neurons	0.669835
FAM161A	1.51729	0.0361911	1.02719	2.24125	Extratelencephalic L5 Neurons	0.669835
GRINA	1.76743	0.00438121	1.19454	2.61509	Extratelencephalic L5 Neurons	0.669835
RPS2	1.45259	0.0422768	1.0131	2.08275	Extratelencephalic L5 Neurons	0.669835
PRKAR1A	1.39024	0.0611581	0.984695	1.96281	Extratelencephalic L5 Neurons	0.669835
AL359436.1	0.724908	0.0729753	0.509977	1.03042	Extratelencephalic L5 Neurons	0.669835
CTCF	0.670224	0.0714358	0.433786	1.03553	Extratelencephalic L5 Neurons	0.669835
CPE	1.40538	0.0611838	0.984161	2.00687	Extratelencephalic L5 Neurons	0.669835
GLIS1	0.558354	0.0121265	0.354123	0.880369	Extratelencephalic L5 Neurons	0.669835
SLC3A2	1.42635	0.0428314	1.01152	2.01129	Extratelencephalic L5 Neurons	0.669835
HMGCS1	1.97076	0.000992416	1.31598	2.95133	Extratelencephalic L5 Neurons	0.669835
GABPA	0.683777	0.0744728	0.45031	1.03829	Extratelencephalic L5 Neurons	0.669835
SF3B1	1.72389	0.0132125	1.12057	2.65204	Extratelencephalic L5 Neurons	0.669835
GRSF1	1.47091	0.0421854	1.01371	2.13431	Extratelencephalic L5 Neurons	0.669835
TOGARAM1	0.721168	0.0600369	0.512948	1.01391	Extratelencephalic L5 Neurons	0.669835
CNBP	1.51549	0.0129842	1.09169	2.10381	Extratelencephalic L5 Neurons	0.669835
NUDT21	1.48798	0.035305	1.02773	2.15436	Extratelencephalic L5 Neurons	0.669835
FAF1	0.569539	0.00895352	0.373423	0.868653	Extratelencephalic L5 Neurons	0.669835
TLE5	1.48179	0.0400208	1.01807	2.15672	Extratelencephalic L5 Neurons	0.669835
ILRUN	1.42322	0.0271792	1.04057	1.94658	Extratelencephalic L5 Neurons	0.669835
SIPA1L3	0.63089	0.0336228	0.41248	0.96495	Extratelencephalic L5 Neurons	0.669835
OPN3	1.47155	0.0262016	1.0468	2.06864	Extratelencephalic L5 Neurons	0.669835
SRP19	1.5333	0.0304622	1.04112	2.25815	Extratelencephalic L5 Neurons	0.669835
CMPK1	1.4545	0.0436381	1.01074	2.09309	Extratelencephalic L5 Neurons	0.669835
WBP2	1.59469	0.0152367	1.0939	2.32473	Extratelencephalic L5 Neurons	0.669835
FBXO7	0.675116	0.06213	0.446788	1.02013	Extratelencephalic L5 Neurons	0.669835
TSBP1-AS1	1.40291	0.0365509	1.0214	1.92691	Extratelencephalic L5 Neurons	0.669835
HINT3	1.48676	0.0403936	1.01751	2.17243	Extratelencephalic L5 Neurons	0.669835
N4BP1	0.638751	0.0137146	0.447222	0.912306	Extratelencephalic L5 Neurons	0.669835
NDUFB2	1.38758	0.0846265	0.956244	2.01347	Extratelencephalic L5 Neurons	0.669835
SPRYD7	1.46593	0.0635403	0.978666	2.19578	Extratelencephalic L5 Neurons	0.669835
ZFAND5	1.72454	0.00600812	1.16903	2.54402	Extratelencephalic L5 Neurons	0.669835
ZFPM2	0.642705	0.0165748	0.447672	0.922706	Extratelencephalic L5 Neurons	0.669835
ACTB	1.48839	0.0365548	1.02517	2.16091	Extratelencephalic L5 Neurons	0.669835
AFF2	0.599426	0.0226581	0.386007	0.930842	Extratelencephalic L5 Neurons	0.669835
NGRN	1.47184	0.0538797	0.993565	2.18033	Extratelencephalic L5 Neurons	0.669835
TMEM163	0.738162	0.0836942	0.523292	1.04126	Extratelencephalic L5 Neurons	0.669835
MICALL2	0.735781	0.0915936	0.515156	1.05089	Astrocytes	0.669932
HNRNPL	0.786772	0.0914072	0.595547	1.0394	Astrocytes	0.669932
CACNB4	0.754127	0.0916811	0.543279	1.04681	Astrocytes	0.669932
EZH1	0.762473	0.0916409	0.556384	1.0449	Astrocytes	0.669932
UBASH3B	1.28814	0.0917894	0.959692	1.72901	Astrocytes	0.670014
PPAT	1.33263	0.0860492	0.960104	1.84971	Extratelencephalic L5 Neurons	0.670045
DLST	1.36742	0.0865151	0.956097	1.95569	Extratelencephalic L5 Neurons	0.670386
LAMC1	0.730938	0.0862235	0.510947	1.04565	Extratelencephalic L5 Neurons	0.670386
RAD9A	0.706706	0.0864027	0.475235	1.05092	Extratelencephalic L5 Neurons	0.670386
CLCN3	1.41286	0.0864517	0.951699	2.09747	Extratelencephalic L5 Neurons	0.670386
AC068587.4	1.26991	0.0920796	0.961679	1.67692	Astrocytes	0.670713
WBP1L	1.2796	0.0919888	0.960561	1.70461	Astrocytes	0.670713
TRDMT1	0.805009	0.0922801	0.625359	1.03627	Astrocytes	0.670835
MAP3K14	1.27651	0.0922909	0.960686	1.69616	Astrocytes	0.670835
PTPN12	1.24075	0.092398	0.965101	1.59514	Astrocytes	0.670906
CYP4F11	1.28388	0.092627	0.95949	1.71794	Astrocytes	0.671404
RELL1	1.26997	0.0927199	0.961145	1.67803	Astrocytes	0.671404
OFD1	0.786318	0.0928558	0.594066	1.04079	Astrocytes	0.671404
DNAJC17	0.797997	0.0927827	0.613381	1.03818	Astrocytes	0.671404
YPEL3	1.40086	0.0867707	0.95249	2.06028	Extratelencephalic L5 Neurons	0.671548
TGFBR3	1.23852	0.100287	0.959636	1.59846	Astrocytes	0.672235
CPNE1	0.767581	0.098004	0.561106	1.05003	Astrocytes	0.672235
ZNF883	0.780772	0.100897	0.580923	1.04937	Astrocytes	0.672235
ST6GAL2	0.748363	0.094712	0.532668	1.0514	Astrocytes	0.672235
PROS1	1.28155	0.0964086	0.956583	1.71692	Astrocytes	0.672235
TMX2	1.26751	0.0976304	0.957489	1.67792	Astrocytes	0.672235
MYH10	0.79516	0.0960398	0.607054	1.04155	Astrocytes	0.672235
TCF7L2	1.2523	0.0941176	0.962301	1.6297	Astrocytes	0.672235
CENPP	0.767234	0.0953252	0.561963	1.04749	Astrocytes	0.672235
RNPS1	1.27272	0.0976569	0.956748	1.69304	Astrocytes	0.672235
NFE2L2	1.25532	0.0959344	0.960495	1.64065	Astrocytes	0.672235
KIF1BP	1.29911	0.101254	0.950005	1.7765	Astrocytes	0.672235
FAF1	0.772645	0.0952484	0.570659	1.04612	Astrocytes	0.672235
METTL25	0.78279	0.0977913	0.585789	1.04604	Astrocytes	0.672235
PRTFDC1	0.795505	0.0979975	0.606666	1.04312	Astrocytes	0.672235
AC008014.1	0.790508	0.0953937	0.599669	1.04208	Astrocytes	0.672235
LINC01138	1.28641	0.0994409	0.953363	1.7358	Astrocytes	0.672235
ZFP82	0.801568	0.101247	0.615257	1.0443	Astrocytes	0.672235
CTXND1	0.760699	0.0965523	0.550948	1.0503	Astrocytes	0.672235
ZNF235	0.780688	0.0958743	0.583337	1.04481	Astrocytes	0.672235
INPP4A	0.742232	0.0974652	0.521713	1.05596	Astrocytes	0.672235
DCP1B	0.771525	0.0983615	0.567239	1.04938	Astrocytes	0.672235
SMARCA4	0.750954	0.0944448	0.53683	1.05049	Astrocytes	0.672235
ZMYM5	0.788022	0.0958463	0.595346	1.04305	Astrocytes	0.672235
HDAC9	0.801821	0.0992566	0.616634	1.04262	Astrocytes	0.672235
BMPR2	1.29676	0.0994302	0.951924	1.76652	Astrocytes	0.672235
LANCL2	0.781429	0.100003	0.582446	1.04839	Astrocytes	0.672235
PUS7	0.804925	0.0963902	0.623238	1.03958	Astrocytes	0.672235
NCBP3	0.760105	0.0944885	0.551116	1.04834	Astrocytes	0.672235
C5orf30	0.799365	0.0953584	0.614399	1.04002	Astrocytes	0.672235
BAALC	1.28566	0.0982632	0.954463	1.73177	Astrocytes	0.672235
MTURN	1.25028	0.095618	0.961421	1.62593	Astrocytes	0.672235
BDP1	0.80266	0.0974345	0.61892	1.04095	Astrocytes	0.672235
DNAH9	1.2474	0.0976398	0.960292	1.62035	Astrocytes	0.672235
PTPRJ	0.756556	0.0998191	0.542683	1.05472	Astrocytes	0.672235
INTS8	0.79596	0.0997427	0.606573	1.04448	Astrocytes	0.672235
SRSF5	0.768207	0.100464	0.560826	1.05227	Astrocytes	0.672235
DTNB	0.807766	0.100881	0.625923	1.04244	Astrocytes	0.672235
YIPF4	0.795658	0.0932686	0.609251	1.0391	Astrocytes	0.672235
PRDM10	0.796676	0.0959591	0.609616	1.04113	Astrocytes	0.672235
EYA3	0.771421	0.100951	0.565733	1.05189	Astrocytes	0.672235
ZNF146	0.817002	0.0992243	0.642493	1.03891	Astrocytes	0.672235
AP1B1	0.744978	0.0994882	0.524831	1.05747	Astrocytes	0.672235
CAPZB	1.28268	0.101164	0.952452	1.72741	Astrocytes	0.672235
SHC2	1.27193	0.0990305	0.955743	1.69273	Astrocytes	0.672235
SGCD	0.795479	0.0996173	0.605831	1.04449	Astrocytes	0.672235
PPARD	1.28346	0.0983231	0.954716	1.7254	Astrocytes	0.672235
JPX	0.645898	0.0938227	0.38735	1.07702	Astrocytes	0.672235
NDRG3	0.793481	0.100842	0.601905	1.04603	Astrocytes	0.672235
YOD1	1.26297	0.0940174	0.960988	1.65984	Astrocytes	0.672235
GAN	1.28126	0.0955742	0.957322	1.71482	Astrocytes	0.672235
PPP1R3E	0.753429	0.100541	0.537394	1.05631	Astrocytes	0.672235
D2HGDH	0.748165	0.0942684	0.532605	1.05097	Astrocytes	0.672235
YARS2	0.768586	0.0933478	0.565164	1.04523	Astrocytes	0.672235
SPON1	0.792003	0.096873	0.601404	1.04301	Astrocytes	0.672235
ATF1	0.732691	0.0948724	0.508637	1.05544	Astrocytes	0.672235
SLC38A10	0.794368	0.0973204	0.605107	1.04283	Astrocytes	0.672235
GABBR1	0.745505	0.0973936	0.526786	1.05504	Astrocytes	0.672235
FRMD4A	0.785202	0.101224	0.588018	1.04851	Astrocytes	0.672235
FAM149B1	0.799332	0.0956215	0.614214	1.04024	Astrocytes	0.672235
THSD1	0.782564	0.100454	0.584075	1.04851	Astrocytes	0.672235
PON2	0.764233	0.0992515	0.555118	1.05212	Astrocytes	0.672235
B4GALT5	1.26353	0.100417	0.955845	1.67027	Astrocytes	0.672235
USP36	0.792483	0.0953278	0.602966	1.04157	Astrocytes	0.672235
SELENOP	1.32465	0.0938302	0.953388	1.84049	Astrocytes	0.672235
METTL8	0.797265	0.100523	0.608377	1.0448	Astrocytes	0.672235
DPY19L4	0.721246	0.0947142	0.491617	1.05813	Astrocytes	0.672235
DGKB	0.791286	0.0970753	0.600117	1.04335	Astrocytes	0.672235
RESF1	0.787518	0.0998703	0.592505	1.04672	Astrocytes	0.672235
EML1	0.757132	0.0957432	0.545768	1.05035	Astrocytes	0.672235
SLC9B2	1.30355	0.0958198	0.954201	1.78081	Astrocytes	0.672235
TOX4	0.767597	0.0965194	0.561911	1.04857	Astrocytes	0.672235
AC090825.1	1.24274	0.0980545	0.960646	1.60767	Astrocytes	0.672235
VPS51	0.765029	0.100546	0.555706	1.0532	Astrocytes	0.672235
RGL1	1.26515	0.0941774	0.960577	1.66629	Astrocytes	0.672235
TXNL4B	0.781407	0.0986113	0.583114	1.04713	Astrocytes	0.672235
MYO15B	0.774595	0.101119	0.57077	1.05121	Astrocytes	0.672235
AIMP1	0.770458	0.0961312	0.566689	1.0475	Astrocytes	0.672235
FAM204A	0.768118	0.0984843	0.561714	1.05037	Astrocytes	0.672235
ZXDC	0.762239	0.096315	0.553507	1.04968	Astrocytes	0.672235
CMTM4	1.23533	0.099385	0.960756	1.58837	Astrocytes	0.672235
DPP8	0.804797	0.100117	0.621247	1.04258	Astrocytes	0.672235
FRMPD3	1.26541	0.0994491	0.956336	1.67438	Astrocytes	0.672235
KNOP1	0.751732	0.0957026	0.537354	1.05164	Astrocytes	0.672235
ARPC1A	1.24164	0.0946738	0.963295	1.60042	Astrocytes	0.672235
TUB	1.29677	0.101377	0.950235	1.76968	Astrocytes	0.672402
MAML2	0.679384	0.0869964	0.436366	1.05774	Extratelencephalic L5 Neurons	0.672476
SHANK2	0.792235	0.101601	0.599462	1.047	Astrocytes	0.672709
PRKACB	0.780184	0.101618	0.579599	1.05019	Astrocytes	0.672709
ATG10	0.793456	0.101841	0.601376	1.04689	Astrocytes	0.673535
TTLL5	1.25472	0.101965	0.955961	1.64685	Astrocytes	0.673712
AC090204.1	0.795159	0.102267	0.604011	1.0468	Astrocytes	0.674413
CLDN10	0.790835	0.102241	0.596822	1.04792	Astrocytes	0.674413
NAP1L5	1.35935	0.0874044	0.955961	1.93296	Extratelencephalic L5 Neurons	0.674574
GALNT13	0.756551	0.0875393	0.549342	1.04192	Extratelencephalic L5 Neurons	0.674574
MRPL19	1.40032	0.0878768	0.951258	2.06136	Extratelencephalic L5 Neurons	0.674574
ARL6IP5	1.36837	0.0879048	0.954492	1.9617	Extratelencephalic L5 Neurons	0.674574
GALNT8	1.29111	0.0877279	0.962923	1.73115	Extratelencephalic L5 Neurons	0.674574
SARAF	1.39971	0.0877573	0.951458	2.05915	Extratelencephalic L5 Neurons	0.674574
GNPDA2	1.39375	0.0908003	0.948598	2.0478	Extratelencephalic L5 Neurons	0.674592
HEATR5B	0.73974	0.0897789	0.522192	1.04792	Extratelencephalic L5 Neurons	0.674592
MAPK1	1.40843	0.0909469	0.946849	2.09504	Extratelencephalic L5 Neurons	0.674592
ZNF605	0.790299	0.0887277	0.602698	1.03629	Extratelencephalic L5 Neurons	0.674592
CACNA1B	0.758986	0.0910624	0.551212	1.04508	Extratelencephalic L5 Neurons	0.674592
PTPRN	1.56897	0.0913372	0.930103	2.64665	Extratelencephalic L5 Neurons	0.674592
CFAP46	0.736958	0.09005	0.517813	1.04885	Extratelencephalic L5 Neurons	0.674592
SLC25A32	1.36101	0.0916743	0.95127	1.94723	Extratelencephalic L5 Neurons	0.674592
TNRC6A	0.750107	0.0885565	0.538773	1.04434	Extratelencephalic L5 Neurons	0.674592
WTAP	1.33864	0.0910542	0.954448	1.87747	Extratelencephalic L5 Neurons	0.674592
NDUFB6	1.36187	0.0897216	0.953234	1.94569	Extratelencephalic L5 Neurons	0.674592
NCKAP1	1.40528	0.0884894	0.950042	2.07866	Extratelencephalic L5 Neurons	0.674592
FLOT1	1.42519	0.0905617	0.945528	2.14817	Extratelencephalic L5 Neurons	0.674592
GOSR2	1.35808	0.0906326	0.95269	1.93598	Extratelencephalic L5 Neurons	0.674592
ASCC3	0.765798	0.0905217	0.562244	1.04305	Extratelencephalic L5 Neurons	0.674592
C11orf87	1.42117	0.0918902	0.944367	2.13872	Extratelencephalic L5 Neurons	0.674592
SECISBP2L	1.34846	0.0906675	0.953728	1.90657	Extratelencephalic L5 Neurons	0.674592
TBC1D31	1.33945	0.0919415	0.953469	1.88168	Extratelencephalic L5 Neurons	0.674592
PTMS	1.38699	0.0914855	0.948569	2.02803	Extratelencephalic L5 Neurons	0.674592
INTS2	0.705597	0.0894232	0.471837	1.05517	Extratelencephalic L5 Neurons	0.674592
ATP6V0C	1.41248	0.0916715	0.945567	2.10995	Extratelencephalic L5 Neurons	0.674592
CDK6	0.737912	0.0912065	0.518604	1.04996	Extratelencephalic L5 Neurons	0.674592
MEGF11	0.764396	0.0882019	0.561284	1.04101	Extratelencephalic L5 Neurons	0.674592
TUBA1B	1.44447	0.0907552	0.943281	2.21195	Extratelencephalic L5 Neurons	0.674592
PNMA8B	1.38568	0.0896902	0.950711	2.01966	Extratelencephalic L5 Neurons	0.674592
XPOT	1.40821	0.0893469	0.94874	2.09019	Extratelencephalic L5 Neurons	0.674592
KIAA1549	0.742911	0.0881004	0.527976	1.04534	Extratelencephalic L5 Neurons	0.674592
AC027018.1	1.46051	0.0891367	0.943707	2.26034	Extratelencephalic L5 Neurons	0.674592
ZC3H12C	1.35725	0.0917442	0.951623	1.93579	Extratelencephalic L5 Neurons	0.674592
TXNDC15	1.297	0.0885133	0.961565	1.74945	Extratelencephalic L5 Neurons	0.674592
WSB2	1.37897	0.0907772	0.950232	2.00116	Extratelencephalic L5 Neurons	0.674592
PPP2R2C	0.712464	0.0916881	0.480457	1.0565	Extratelencephalic L5 Neurons	0.674592
ANAPC10	0.736414	0.0903018	0.516847	1.04926	Extratelencephalic L5 Neurons	0.674592
SIMC1	0.718541	0.0896571	0.490542	1.05251	Extratelencephalic L5 Neurons	0.674592
MIR34AHG	0.713408	0.0912493	0.48209	1.05572	Extratelencephalic L5 Neurons	0.674592
ARL5A	1.37989	0.0912179	0.949648	2.00506	Extratelencephalic L5 Neurons	0.674592
EFL1	0.772458	0.0887216	0.573808	1.03988	Extratelencephalic L5 Neurons	0.674592
KLHL42	1.37353	0.0898402	0.951846	1.98204	Extratelencephalic L5 Neurons	0.674592
TUBB	1.45698	0.0930076	0.939136	2.26036	Extratelencephalic L5 Neurons	0.675328
SGCB	1.34016	0.0923588	0.952969	1.88467	Extratelencephalic L5 Neurons	0.675328
PDE7B	1.33713	0.0921874	0.953495	1.87512	Extratelencephalic L5 Neurons	0.675328
SLC47A1	0.739198	0.0931047	0.519492	1.05182	Extratelencephalic L5 Neurons	0.675328
PACSIN1	1.41989	0.0928783	0.943338	2.13719	Extratelencephalic L5 Neurons	0.675328
TAF1D	0.663862	0.0927727	0.411736	1.07038	Extratelencephalic L5 Neurons	0.675328
TSPOAP1	0.684384	0.0929644	0.43969	1.06526	Extratelencephalic L5 Neurons	0.675328
MPC2	1.36988	0.092757	0.949111	1.97719	Extratelencephalic L5 Neurons	0.675328
LARP1	1.38173	0.0927817	0.947729	2.01447	Extratelencephalic L5 Neurons	0.675328
PC	0.723988	0.0924539	0.496978	1.05469	Extratelencephalic L5 Neurons	0.675328
ZNF569	0.815401	0.102666	0.638167	1.04186	Astrocytes	0.675751
DTWD2	0.777606	0.102574	0.574917	1.05176	Astrocytes	0.675751
MTMR14	0.786558	0.103131	0.589307	1.04983	Astrocytes	0.677858
BTBD2	0.790521	0.103182	0.595841	1.04881	Astrocytes	0.677858
LRRC49	0.785558	0.09366	0.592411	1.04168	Extratelencephalic L5 Neurons	0.678576
PPP2CA	1.35736	0.093766	0.949514	1.9404	Extratelencephalic L5 Neurons	0.678576
SLC15A4	1.24058	0.103449	0.957043	1.60813	Astrocytes	0.678965
LDLRAD4	1.35965	0.105748	0.937039	1.97286	Astrocytes	0.67939
AC090115.1	0.810179	0.109957	0.625864	1.04878	Astrocytes	0.67939
SRSF3	1.25577	0.108972	0.950516	1.65905	Astrocytes	0.67939
MDFIC	1.26245	0.111389	0.94755	1.68201	Astrocytes	0.67939
MVB12B	0.796396	0.107396	0.603622	1.05073	Astrocytes	0.67939
KMT5B	0.797625	0.106634	0.606051	1.04976	Astrocytes	0.67939
CPLANE1	0.838971	0.110364	0.676295	1.04078	Astrocytes	0.67939
POU3F2	0.778239	0.104747	0.574852	1.05358	Astrocytes	0.67939
ANKRD28	1.27161	0.107202	0.949259	1.70343	Astrocytes	0.67939
ERICH1	0.776352	0.109986	0.569159	1.05897	Astrocytes	0.67939
PHACTR4	0.773703	0.104034	0.567842	1.05419	Astrocytes	0.67939
ZNF398	0.781026	0.10972	0.576947	1.05729	Astrocytes	0.67939
CLDND1	1.35687	0.10374	0.939446	1.95977	Astrocytes	0.67939
ST7	0.773877	0.106818	0.566717	1.05676	Astrocytes	0.67939
RNF170	0.752427	0.10427	0.533845	1.06051	Astrocytes	0.67939
ZNF451	0.785774	0.108708	0.585274	1.05496	Astrocytes	0.67939
TMEM184B	0.776256	0.110726	0.568635	1.05968	Astrocytes	0.67939
LINC-PINT	1.2552	0.105472	0.953235	1.65283	Astrocytes	0.67939
DHX57	0.771709	0.108344	0.562435	1.05885	Astrocytes	0.67939
LPP	1.25561	0.10897	0.950544	1.6586	Astrocytes	0.67939
ETFA	0.799274	0.109315	0.607565	1.05147	Astrocytes	0.67939
DCHS2	0.817133	0.108028	0.638744	1.04534	Astrocytes	0.67939
TGFB2	1.23328	0.103836	0.957923	1.5878	Astrocytes	0.67939
CPD	1.24188	0.1067	0.954499	1.61578	Astrocytes	0.67939
TBL1X	1.27178	0.105823	0.950326	1.70196	Astrocytes	0.67939
VAPA	1.26724	0.108735	0.948775	1.69261	Astrocytes	0.67939
BAZ1B	0.816997	0.111207	0.637094	1.0477	Astrocytes	0.67939
PURB	1.28101	0.105614	0.94904	1.72911	Astrocytes	0.67939
KHDRBS3	0.808692	0.106458	0.624913	1.04652	Astrocytes	0.67939
MDGA2	0.82003	0.108505	0.643572	1.04487	Astrocytes	0.67939
GLCCI1	0.792225	0.105773	0.597417	1.05056	Astrocytes	0.67939
EIF2B3	0.802869	0.109243	0.613693	1.05036	Astrocytes	0.67939
KIAA0586	1.28033	0.106312	0.948578	1.72811	Astrocytes	0.67939
CCDC102B	0.801333	0.106642	0.612305	1.04872	Astrocytes	0.67939
SORBS1	1.25856	0.108106	0.9507	1.66612	Astrocytes	0.67939
CAMSAP2	1.32463	0.107324	0.940782	1.86508	Astrocytes	0.67939
MAGI2-AS3	0.789319	0.104802	0.593055	1.05054	Astrocytes	0.67939
GNG12-AS1	1.3994	0.104782	0.932393	2.10031	Astrocytes	0.67939
ADH5	0.771177	0.106429	0.562542	1.05719	Astrocytes	0.67939
CHST12	0.802759	0.104577	0.615691	1.04667	Astrocytes	0.67939
ACSS3	1.24635	0.106368	0.954005	1.62827	Astrocytes	0.67939
MTSS1	0.813878	0.111138	0.631713	1.04857	Astrocytes	0.67939
CDR2	0.760593	0.110828	0.543326	1.06474	Astrocytes	0.67939
ANKRD6	1.25258	0.110301	0.950073	1.6514	Astrocytes	0.67939
LINC00963	1.28224	0.110578	0.944806	1.74018	Astrocytes	0.67939
B3GAT1	0.802066	0.110447	0.61177	1.05156	Astrocytes	0.67939
TP53BP1	0.781657	0.111215	0.577252	1.05844	Astrocytes	0.67939
TK2	0.7972	0.111176	0.603188	1.05362	Astrocytes	0.67939
GAS2	0.807861	0.109542	0.622074	1.04913	Astrocytes	0.67939
[truncated: 128,087 more rows]

## Sheet: Supplementary Table 5
Supplementary Table 5: Gene Ontology (GO) categories enriched within genes upregulated across all cell-types.
GO Term	Overlapping genes in GO term	Total number of genes in GO term	Number of upregulated genes across all cell types	All expressed genes	Fold Enrichment	Gene Ratio	P-value	Adjusted P-value	GO Term - Clean version
Cytoplasmic Translation (GO:0002181)	13	87	251	23122	13.765	0.0517928	1.06886e-11	5.98563e-09	Cytoplasmic Translation
Macromolecule Biosynthetic Process (GO:0009059)	16	165	251	23122	8.9328	0.063745	3.72241e-11	6.94849e-09	Macromolecule Biosynthetic Process
Peptide Biosynthetic Process (GO:0043043)	15	137	251	23122	10.0861	0.059761	2.69569e-11	6.94849e-09	Peptide Biosynthetic Process
Translation (GO:0006412)	17	207	251	23122	7.56537	0.0677291	1.26293e-10	1.7681e-08	Translation
Gene Expression (GO:0010467)	18	266	251	23122	6.23365	0.0717131	8.39462e-10	9.40198e-08	Gene Expression
Ubiquitin-Dependent Protein Catabolic Process (GO:0006511)	14	337	251	23122	3.82692	0.0557769	2.09252e-05	0.00168286	Ubiquitin-Dependent Protein Catabolic Process
Proteasome-Mediated Ubiquitin-Dependent Protein Catabolic Process (GO:0043161)	13	297	251	23122	4.03217	0.0517928	2.40408e-05	0.00168286	Proteasome-Mediated Ubiquitin-Dependent Protein Catabolic Process
Mitotic Cytokinesis (GO:0000281)	6	53	251	23122	10.4286	0.0239044	2.30862e-05	0.00168286	Mitotic Cytokinesis
Regulation Of GTPase Activity (GO:0043087)	10	185	251	23122	4.97943	0.0398406	3.64789e-05	0.0022698	Regulation Of GTPase Activity
Proline Transport (GO:0015824)	3	8	251	23122	34.5448	0.0119522	6.79921e-05	0.00346141	Proline Transport
Regulation Of RNA Splicing (GO:0043484)	7	92	251	23122	7.00909	0.0278884	6.53066e-05	0.00346141	Regulation Of RNA Splicing
Proteasomal Protein Catabolic Process (GO:0010498)	10	206	251	23122	4.47182	0.0398406	8.99724e-05	0.00419871	Proteasomal Protein Catabolic Process
Cytoskeleton-Dependent Cytokinesis (GO:0061640)	6	75	251	23122	7.36956	0.0239044	0.00016597	0.00714948	Cytoskeleton-Dependent Cytokinesis
Positive Regulation Of Hydrolase Activity (GO:0051345)	8	147	251	23122	5.01331	0.0318725	0.000210054	0.00840218	Positive Regulation Of Hydrolase Activity
Positive Regulation Of GTPase Activity (GO:0043547)	9	196	251	23122	4.22998	0.0358566	0.000304789	0.0113788	Positive Regulation Of GTPase Activity
Regulation Of Autophagosome Assembly (GO:2000785)	4	33	251	23122	11.166	0.0159363	0.000433111	0.0127654	Regulation Of Autophagosome Assembly
Positive Regulation Of Autophagosome Assembly (GO:2000786)	3	14	251	23122	19.7399	0.0119522	0.000421118	0.0127654	Positive Regulation Of Autophagosome Assembly
Positive Regulation Of Membrane Protein Ectodomain Proteolysis (GO:0051044)	3	14	251	23122	19.7399	0.0119522	0.000421118	0.0127654	Positive Regulation Of Membrane Protein Ectodomain Proteolysis
Positive Regulation Of Organelle Organization (GO:0010638)	4	32	251	23122	11.5149	0.0159363	0.000383863	0.0127654	Positive Regulation Of Organelle Organization
Intracellular Protein Transport (GO:0006886)	11	309	251	23122	3.27934	0.0438247	0.000597022	0.0167166	Intracellular Protein Transport
Membrane Fission (GO:0090148)	4	38	251	23122	9.69679	0.0159363	0.000748793	0.0193303	Membrane Fission
protein-RNA Complex Assembly (GO:0022618)	7	137	251	23122	4.70684	0.0278884	0.000759405	0.0193303	protein-RNA Complex Assembly
Regulation Of Protein Neddylation (GO:2000434)	3	18	251	23122	15.3533	0.0119522	0.000914218	0.0222592	Regulation Of Protein Neddylation
Ribosome Biogenesis (GO:0042254)	7	147	251	23122	4.38664	0.0278884	0.00114742	0.0234623	Ribosome Biogenesis
Regulation Of Endoplasmic Reticulum Tubular Network Organization (GO:1903371)	2	5	251	23122	36.8478	0.00796813	0.00114869	0.0234623	Regulation Of Endoplasmic Reticulum Tubular Network Organization
Positive Regulation Of Vacuole Organization (GO:0044090)	3	19	251	23122	14.5452	0.0119522	0.00107697	0.0234623	Positive Regulation Of Vacuole Organization
Ribosome Assembly (GO:0042255)	4	43	251	23122	8.56926	0.0159363	0.00119992	0.0234623	Ribosome Assembly
Regulation Of Fibroblast Migration (GO:0010762)	3	19	251	23122	14.5452	0.0119522	0.00107697	0.0234623	Regulation Of Fibroblast Migration
Regulation Of Membrane Protein Ectodomain Proteolysis (GO:0051043)	3	20	251	23122	13.8179	0.0119522	0.00125691	0.0234623	Regulation Of Membrane Protein Ectodomain Proteolysis
Protein K48-linked Deubiquitination (GO:0071108)	3	20	251	23122	13.8179	0.0119522	0.00125691	0.0234623	Protein K48-linked Deubiquitination
Insulin Receptor Signaling Pathway (GO:0008286)	4	44	251	23122	8.3745	0.0159363	0.00130878	0.0236425	Insulin Receptor Signaling Pathway
Protein Neddylation (GO:0045116)	3	21	251	23122	13.1599	0.0119522	0.0014547	0.0246858	Protein Neddylation
Regulation Of Nucleic Acid-Templated Transcription (GO:1903506)	12	397	251	23122	2.78447	0.0478088	0.00141378	0.0246858	Regulation Of Nucleic Acid-Templated Transcription
Synaptic Vesicle Budding From Presynaptic Endocytic Zone Membrane (GO:0016185)	2	6	251	23122	30.7065	0.00796813	0.00171069	0.0281761	Synaptic Vesicle Budding From Presynaptic Endocytic Zone Membrane
protein-DNA Complex Organization (GO:0071824)	4	50	251	23122	7.36956	0.0159363	0.00211044	0.0290096	protein-DNA Complex Organization
Golgi Organization (GO:0007030)	6	119	251	23122	4.64468	0.0239044	0.00192625	0.0290096	Golgi Organization
Ribosomal Large Subunit Biogenesis (GO:0042273)	4	49	251	23122	7.51996	0.0159363	0.00195809	0.0290096	Ribosomal Large Subunit Biogenesis
Regulation Of I-kappaB kinase/NF-kappaB Signaling (GO:0043122)	8	211	251	23122	3.49268	0.0318725	0.0022249	0.0290096	Regulation Of I-kappaB kinase/NF-kappaB Signaling
Protein Localization To Chromatin (GO:0071168)	3	24	251	23122	11.5149	0.0119522	0.00216128	0.0290096	Protein Localization To Chromatin
Regulation Of RNA Metabolic Process (GO:0051252)	5	82	251	23122	5.61704	0.0199203	0.00200315	0.0290096	Regulation Of RNA Metabolic Process
Protein Modification By Small Protein Conjugation (GO:0032446)	10	311	251	23122	2.96204	0.0398406	0.00222752	0.0290096	Protein Modification By Small Protein Conjugation
Positive Regulation Of Protein Catabolic Process (GO:0045732)	5	83	251	23122	5.54937	0.0199203	0.002113	0.0290096	Positive Regulation Of Protein Catabolic Process
T Cell Receptor Signaling Pathway (GO:0050852)	5	81	251	23122	5.68639	0.0199203	0.00189753	0.0290096	T Cell Receptor Signaling Pathway
Regulation Of mRNA Splicing, Via Spliceosome (GO:0048024)	5	86	251	23122	5.35579	0.0199203	0.00246893	0.0314227	Regulation Of mRNA Splicing, Via Spliceosome
Regulation Of Protein Lipidation (GO:1903059)	2	8	251	23122	23.0299	0.00796813	0.00314778	0.0338992	Regulation Of Protein Lipidation
Positive Regulation Of Cytokinesis (GO:0032467)	3	27	251	23122	10.2355	0.0119522	0.00304946	0.0338992	Positive Regulation Of Cytokinesis
succinyl-CoA Metabolic Process (GO:0006104)	2	8	251	23122	23.0299	0.00796813	0.00314778	0.0338992	succinyl-CoA Metabolic Process
Regulation Of Attachment Of Spindle Microtubules To Kinetochore (GO:0051988)	2	8	251	23122	23.0299	0.00796813	0.00314778	0.0338992	Regulation Of Attachment Of Spindle Microtubules To Kinetochore
Positive Regulation Of Macroautophagy (GO:0016239)	4	55	251	23122	6.6996	0.0159363	0.00299619	0.0338992	Positive Regulation Of Macroautophagy
DNA Metabolic Process (GO:0006259)	9	271	251	23122	3.05932	0.0358566	0.00295113	0.0338992	DNA Metabolic Process
Negative Regulation Of Ubiquitin Protein Ligase Activity (GO:1904667)	2	8	251	23122	23.0299	0.00796813	0.00314778	0.0338992	Negative Regulation Of Ubiquitin Protein Ligase Activity
Regulation Of T-helper 17 Cell Differentiation (GO:2000319)	2	8	251	23122	23.0299	0.00796813	0.00314778	0.0338992	Regulation Of T-helper 17 Cell Differentiation
RNA Splicing (GO:0008380)	5	94	251	23122	4.89997	0.0199203	0.003629	0.0383441	RNA Splicing
Regulation Of Translation (GO:0006417)	7	181	251	23122	3.56263	0.0278884	0.00371585	0.0385347	Regulation Of Translation
Regulation Of Neurogenesis (GO:0050767)	4	59	251	23122	6.24539	0.0159363	0.00386575	0.0393603	Regulation Of Neurogenesis
Establishment Of Protein Localization To Membrane (GO:0090150)	4	61	251	23122	6.04062	0.0159363	0.00435851	0.0428205	Establishment Of Protein Localization To Membrane
Cellular Response To Cytokine Stimulus (GO:0071345)	8	235	251	23122	3.13598	0.0318725	0.00428482	0.0428205	Cellular Response To Cytokine Stimulus
Negative Regulation Of JUN Kinase Activity (GO:0043508)	2	10	251	23122	18.4239	0.00796813	0.00498696	0.0436359	Negative Regulation Of JUN Kinase Activity
Alanine Transport (GO:0032328)	2	10	251	23122	18.4239	0.00796813	0.00498696	0.0436359	Alanine Transport
Transforming Growth Factor Beta Receptor Signaling Pathway (GO:0007179)	4	63	251	23122	5.84886	0.0159363	0.00489196	0.0436359	Transforming Growth Factor Beta Receptor Signaling Pathway
Positive Regulation Of T-helper 17 Type Immune Response (GO:2000318)	2	10	251	23122	18.4239	0.00796813	0.00498696	0.0436359	Positive Regulation Of T-helper 17 Type Immune Response
Positive Regulation Of Cell Division (GO:0051781)	3	32	251	23122	8.63621	0.0119522	0.00496907	0.0436359	Positive Regulation Of Cell Division
Neutral Amino Acid Transport (GO:0015804)	3	31	251	23122	8.91479	0.0119522	0.00453921	0.0436359	Neutral Amino Acid Transport
Regulation Of Leukocyte Adhesion To Vascular Endothelial Cell (GO:1904994)	2	10	251	23122	18.4239	0.00796813	0.00498696	0.0436359	Regulation Of Leukocyte Adhesion To Vascular Endothelial Cell
Regulation Of Cytokinesis (GO:0032465)	4	64	251	23122	5.75747	0.0159363	0.00517439	0.0439039	Regulation Of Cytokinesis
Antigen Receptor-Mediated Signaling Pathway (GO:0050851)	5	102	251	23122	4.51566	0.0199203	0.00513614	0.0439039	Antigen Receptor-Mediated Signaling Pathway
Negative Regulation Of Protein Binding (GO:0032091)	4	65	251	23122	5.66889	0.0159363	0.00546754	0.0456989	Negative Regulation Of Protein Binding
Positive Regulation Of Intracellular Signal Transduction (GO:1902533)	12	473	251	23122	2.33707	0.0478088	0.005802	0.0470689	Positive Regulation Of Intracellular Signal Transduction
Positive Regulation Of T-helper Cell Differentiation (GO:0045624)	2	11	251	23122	16.749	0.00796813	0.00605171	0.0470689	Positive Regulation Of T-helper Cell Differentiation
Negative Regulation Of Ubiquitin-Dependent Protein Catabolic Process (GO:2000059)	3	34	251	23122	8.12819	0.0119522	0.00590034	0.0470689	Negative Regulation Of Ubiquitin-Dependent Protein Catabolic Process
Regulation Of Amyloid Precursor Protein Catabolic Process (GO:1902991)	2	11	251	23122	16.749	0.00796813	0.00605171	0.0470689	Regulation Of Amyloid Precursor Protein Catabolic Process
Peptidyl-Serine Phosphorylation (GO:0018105)	6	150	251	23122	3.68478	0.0239044	0.0060195	0.0470689	Peptidyl-Serine Phosphorylation
Membrane Organization (GO:0061024)	6	151	251	23122	3.66038	0.0239044	0.00621312	0.0476623	Membrane Organization
Positive Regulation Of I-kappaB kinase/NF-kappaB Signaling (GO:0043123)	6	154	251	23122	3.58907	0.0239044	0.00682119	0.0516198	Positive Regulation Of I-kappaB kinase/NF-kappaB Signaling
DNA Replication (GO:0006260)	4	70	251	23122	5.26397	0.0159363	0.00710012	0.0530142	DNA Replication
Response To Iron Ion (GO:0010039)	2	12	251	23122	15.3533	0.00796813	0.00721033	0.0531287	Response To Iron Ion
Organelle Organization (GO:0006996)	10	369	251	23122	2.49646	0.0398406	0.00734075	0.0533873	Organelle Organization
Negative Regulation Of mRNA Splicing, Via Spliceosome (GO:0048025)	2	13	251	23122	14.1722	0.00796813	0.00846065	0.0557463	Negative Regulation Of mRNA Splicing, Via Spliceosome
Regulation Of JUN Kinase Activity (GO:0043506)	3	39	251	23122	7.08612	0.0119522	0.00866059	0.0557463	Regulation Of JUN Kinase Activity
Protein Import Into Nucleus (GO:0006606)	4	74	251	23122	4.97943	0.0159363	0.00861628	0.0557463	Protein Import Into Nucleus
Amino Acid Transport (GO:0006865)	3	39	251	23122	7.08612	0.0119522	0.00866059	0.0557463	Amino Acid Transport
Positive Regulation Of Protein Modification By Small Protein Conjugation Or Removal (GO:1903322)	4	73	251	23122	5.04765	0.0159363	0.0082191	0.0557463	Positive Regulation Of Protein Modification By Small Protein Conjugation Or Removal
Ribonucleoprotein Complex Biogenesis (GO:0022613)	5	114	251	23122	4.04033	0.0199203	0.00815687	0.0557463	Ribonucleoprotein Complex Biogenesis
Positive Regulation Of Cell Adhesion (GO:0045785)	4	74	251	23122	4.97943	0.0159363	0.00861628	0.0557463	Positive Regulation Of Cell Adhesion
Activation Of Protein Kinase Activity (GO:0032147)	4	73	251	23122	5.04765	0.0159363	0.0082191	0.0557463	Activation Of Protein Kinase Activity
Positive Regulation Of Transcription From RNA Polymerase II Promoter Involved In Cellular Response To Chemical Stimulus (GO:1901522)	2	13	251	23122	14.1722	0.00796813	0.00846065	0.0557463	Positive Regulation Of Transcription From RNA Polymerase II Promoter Involved In Cellular Response To Chemical Stimulus
DNA Repair (GO:0006281)	8	265	251	23122	2.78097	0.0318725	0.00863334	0.0557463	DNA Repair
Regulation Of Vesicle Size (GO:0097494)	2	14	251	23122	13.1599	0.00796813	0.00980057	0.05717	Regulation Of Vesicle Size
Activation Of NF-kappaB-inducing Kinase Activity (GO:0007250)	2	14	251	23122	13.1599	0.00796813	0.00980057	0.05717	Activation Of NF-kappaB-inducing Kinase Activity
Regulation Of T Cell Cytokine Production (GO:0002724)	2	14	251	23122	13.1599	0.00796813	0.00980057	0.05717	Regulation Of T Cell Cytokine Production
Regulation Of Ubiquitin-Dependent Protein Catabolic Process (GO:2000058)	3	40	251	23122	6.90896	0.0119522	0.0092889	0.05717	Regulation Of Ubiquitin-Dependent Protein Catabolic Process
Positive Regulation Of Amide Metabolic Process (GO:0034250)	4	76	251	23122	4.8484	0.0159363	0.00944783	0.05717	Positive Regulation Of Amide Metabolic Process
Negative Regulation Of Anoikis (GO:2000811)	2	14	251	23122	13.1599	0.00796813	0.00980057	0.05717	Negative Regulation Of Anoikis
Positive Regulation Of Protein Ubiquitination (GO:0031398)	4	75	251	23122	4.91304	0.0159363	0.00902581	0.05717	Positive Regulation Of Protein Ubiquitination
Negative Regulation Of mRNA Processing (GO:0050686)	2	14	251	23122	13.1599	0.00796813	0.00980057	0.05717	Negative Regulation Of mRNA Processing
Extrinsic Apoptotic Signaling Pathway In Absence Of Ligand (GO:0097192)	2	14	251	23122	13.1599	0.00796813	0.00980057	0.05717	Extrinsic Apoptotic Signaling Pathway In Absence Of Ligand
Regulation Of Ubiquitin Protein Ligase Activity (GO:1904666)	2	15	251	23122	12.2826	0.00796813	0.011228	0.059506	Regulation Of Ubiquitin Protein Ligase Activity
Regulation Of Synaptic Vesicle Exocytosis (GO:2000300)	2	15	251	23122	12.2826	0.00796813	0.011228	0.059506	Regulation Of Synaptic Vesicle Exocytosis
Positive Regulation Of Protein Metabolic Process (GO:0051247)	6	171	251	23122	3.23226	0.0239044	0.0111065	0.059506	Positive Regulation Of Protein Metabolic Process
Regulation Of Transforming Growth Factor Beta Production (GO:0071634)	2	15	251	23122	12.2826	0.00796813	0.011228	0.059506	Regulation Of Transforming Growth Factor Beta Production
Folic Acid-Containing Compound Metabolic Process (GO:0006760)	2	15	251	23122	12.2826	0.00796813	0.011228	0.059506	Folic Acid-Containing Compound Metabolic Process
Negative Regulation Of Nervous System Development (GO:0051961)	2	15	251	23122	12.2826	0.00796813	0.011228	0.059506	Negative Regulation Of Nervous System Development
Integrin-Mediated Signaling Pathway (GO:0007229)	4	80	251	23122	4.60598	0.0159363	0.0112636	0.059506	Integrin-Mediated Signaling Pathway
Mitotic Sister Chromatid Cohesion (GO:0007064)	2	15	251	23122	12.2826	0.00796813	0.011228	0.059506	Mitotic Sister Chromatid Cohesion
DNA Replication Checkpoint Signaling (GO:0000076)	2	15	251	23122	12.2826	0.00796813	0.011228	0.059506	DNA Replication Checkpoint Signaling
Negative Regulation Of Phagocytosis (GO:0050765)	2	15	251	23122	12.2826	0.00796813	0.011228	0.059506	Negative Regulation Of Phagocytosis
Modification-Dependent Protein Catabolic Process (GO:0019941)	6	176	251	23122	3.14044	0.0239044	0.0126644	0.0631409	Modification-Dependent Protein Catabolic Process
Protein Deubiquitination (GO:0016579)	4	82	251	23122	4.49364	0.0159363	0.01225	0.0631409	Protein Deubiquitination
Establishment Of Protein Localization To Endoplasmic Reticulum (GO:0072599)	2	16	251	23122	11.5149	0.00796813	0.0127409	0.0631409	Establishment Of Protein Localization To Endoplasmic Reticulum
RNA Processing (GO:0006396)	6	175	251	23122	3.15838	0.0239044	0.0123412	0.0631409	RNA Processing
Protein Stabilization (GO:0050821)	6	175	251	23122	3.15838	0.0239044	0.0123412	0.0631409	Protein Stabilization
Negative Regulation Of Ubiquitin-Protein Transferase Activity (GO:0051444)	2	16	251	23122	11.5149	0.00796813	0.0127409	0.0631409	Negative Regulation Of Ubiquitin-Protein Transferase Activity
Regulation Of DNA Methylation-Dependent Heterochromatin Formation (GO:0090308)	2	16	251	23122	11.5149	0.00796813	0.0127409	0.0631409	Regulation Of DNA Methylation-Dependent Heterochromatin Formation
Regulation Of Macromolecule Metabolic Process (GO:0060255)	5	128	251	23122	3.59842	0.0199203	0.0130236	0.0639755	Regulation Of Macromolecule Metabolic Process
rRNA Metabolic Process (GO:0016072)	4	85	251	23122	4.33504	0.0159363	0.0138306	0.0645426	rRNA Metabolic Process
Endocytosis (GO:0006897)	6	179	251	23122	3.08781	0.0239044	0.0136695	0.0645426	Endocytosis
Protein Modification By Small Protein Removal (GO:0070646)	4	85	251	23122	4.33504	0.0159363	0.0138306	0.0645426	Protein Modification By Small Protein Removal
Cellular Response To Transforming Growth Factor Beta Stimulus (GO:0071560)	4	85	251	23122	4.33504	0.0159363	0.0138306	0.0645426	Cellular Response To Transforming Growth Factor Beta Stimulus
Cellular Response To Type II Interferon (GO:0071346)	3	46	251	23122	6.00779	0.0119522	0.0136104	0.0645426	Cellular Response To Type II Interferon
Regulation Of Proteasomal Protein Catabolic Process (GO:0061136)	3	46	251	23122	6.00779	0.0119522	0.0136104	0.0645426	Regulation Of Proteasomal Protein Catabolic Process
Endomembrane System Organization (GO:0010256)	6	181	251	23122	3.05369	0.0239044	0.0143697	0.0651408	Endomembrane System Organization
Receptor Internalization (GO:0031623)	3	47	251	23122	5.87997	0.0119522	0.014424	0.0651408	Receptor Internalization
Negative Regulation Of Lipid Storage (GO:0010888)	2	17	251	23122	10.8376	0.00796813	0.0143373	0.0651408	Negative Regulation Of Lipid Storage
Leukocyte Tethering Or Rolling (GO:0050901)	2	17	251	23122	10.8376	0.00796813	0.0143373	0.0651408	Leukocyte Tethering Or Rolling
Positive Regulation Of Cellular Catabolic Process (GO:0031331)	5	132	251	23122	3.48938	0.0199203	0.0147101	0.0654622	Positive Regulation Of Cellular Catabolic Process
Golgi Vesicle Transport (GO:0048193)	6	182	251	23122	3.03691	0.0239044	0.014729	0.0654622	Golgi Vesicle Transport
Negative Regulation Of RNA Splicing (GO:0033119)	2	18	251	23122	10.2355	0.00796813	0.0160152	0.0689886	Negative Regulation Of RNA Splicing
Negative Regulation Of Stem Cell Population Maintenance (GO:1902455)	2	18	251	23122	10.2355	0.00796813	0.0160152	0.0689886	Negative Regulation Of Stem Cell Population Maintenance
Antigen Processing And Presentation Of Peptide Antigen Via MHC Class I (GO:0002474)	2	18	251	23122	10.2355	0.00796813	0.0160152	0.0689886	Antigen Processing And Presentation Of Peptide Antigen Via MHC Class I
Positive Regulation Of T Cell Cytokine Production (GO:0002726)	2	18	251	23122	10.2355	0.00796813	0.0160152	0.0689886	Positive Regulation Of T Cell Cytokine Production
Regulation Of Intracellular Steroid Hormone Receptor Signaling Pathway (GO:0033143)	2	19	251	23122	9.69679	0.00796813	0.0177727	0.0702933	Regulation Of Intracellular Steroid Hormone Receptor Signaling Pathway
Leukocyte Adhesion To Vascular Endothelial Cell (GO:0061756)	2	19	251	23122	9.69679	0.00796813	0.0177727	0.0702933	Leukocyte Adhesion To Vascular Endothelial Cell
Glycoprotein Metabolic Process (GO:0009100)	3	51	251	23122	5.4188	0.0119522	0.0179499	0.0702933	Glycoprotein Metabolic Process
Regulation Of Anoikis (GO:2000209)	2	19	251	23122	9.69679	0.00796813	0.0177727	0.0702933	Regulation Of Anoikis
Nucleotide-Excision Repair (GO:0006289)	3	51	251	23122	5.4188	0.0119522	0.0179499	0.0702933	Nucleotide-Excision Repair
Cellular Response To Insulin Stimulus (GO:0032869)	4	90	251	23122	4.0942	0.0159363	0.0167415	0.0702933	Cellular Response To Insulin Stimulus
Cellular Response To Ionizing Radiation (GO:0071479)	3	51	251	23122	5.4188	0.0119522	0.0179499	0.0702933	Cellular Response To Ionizing Radiation
Sodium Ion Homeostasis (GO:0055078)	2	19	251	23122	9.69679	0.00796813	0.0177727	0.0702933	Sodium Ion Homeostasis
Ribosomal Large Subunit Assembly (GO:0000027)	2	19	251	23122	9.69679	0.00796813	0.0177727	0.0702933	Ribosomal Large Subunit Assembly
DNA Damage Response (GO:0006974)	9	357	251	23122	2.32234	0.0358566	0.0164825	0.0702933	DNA Damage Response
Vesicle Cargo Loading (GO:0035459)	2	19	251	23122	9.69679	0.00796813	0.0177727	0.0702933	Vesicle Cargo Loading
Response To Light Stimulus (GO:0009416)	3	51	251	23122	5.4188	0.0119522	0.0179499	0.0702933	Response To Light Stimulus
Regulation Of Cardiac Conduction (GO:1903779)	2	19	251	23122	9.69679	0.00796813	0.0177727	0.0702933	Regulation Of Cardiac Conduction
Negative Regulation Of Cell Development (GO:0010721)	2	20	251	23122	9.21195	0.00796813	0.0196077	0.0717669	Negative Regulation Of Cell Development
Positive Regulation Of Translation (GO:0045727)	4	93	251	23122	3.96213	0.0159363	0.0186585	0.0717669	Positive Regulation Of Translation
Regulation Of Transcription Regulatory Region DNA Binding (GO:2000677)	2	20	251	23122	9.21195	0.00796813	0.0196077	0.0717669	Regulation Of Transcription Regulatory Region DNA Binding
Positive Regulation Of Amyloid Precursor Protein Catabolic Process (GO:1902993)	2	20	251	23122	9.21195	0.00796813	0.0196077	0.0717669	Positive Regulation Of Amyloid Precursor Protein Catabolic Process
Peptide Catabolic Process (GO:0043171)	2	20	251	23122	9.21195	0.00796813	0.0196077	0.0717669	Peptide Catabolic Process
Regulation Of Neural Precursor Cell Proliferation (GO:2000177)	2	20	251	23122	9.21195	0.00796813	0.0196077	0.0717669	Regulation Of Neural Precursor Cell Proliferation
mRNA Splicing, Via Spliceosome (GO:0000398)	6	192	251	23122	2.87874	0.0239044	0.0186715	0.0717669	mRNA Splicing, Via Spliceosome
Negative Regulation Of Proteolysis Involved In Protein Catabolic Process (GO:1903051)	2	20	251	23122	9.21195	0.00796813	0.0196077	0.0717669	Negative Regulation Of Proteolysis Involved In Protein Catabolic Process
Positive Regulation Of Proteolysis (GO:0045862)	3	52	251	23122	5.31459	0.0119522	0.0188995	0.0717669	Positive Regulation Of Proteolysis
Positive Regulation Of Protein Binding (GO:0032092)	3	52	251	23122	5.31459	0.0119522	0.0188995	0.0717669	Positive Regulation Of Protein Binding
mRNA Processing (GO:0006397)	6	196	251	23122	2.81999	0.0239044	0.0204328	0.0743012	mRNA Processing
Sulfur Compound Transport (GO:0072348)	2	21	251	23122	8.77329	0.00796813	0.0215186	0.0772462	Sulfur Compound Transport
Negative Regulation Of Protein Depolymerization (GO:1901880)	2	21	251	23122	8.77329	0.00796813	0.0215186	0.0772462	Negative Regulation Of Protein Depolymerization
Proteolysis (GO:0006508)	7	256	251	23122	2.51889	0.0278884	0.0221758	0.0790983	Proteolysis
Glycerophospholipid Biosynthetic Process (GO:0046474)	4	99	251	23122	3.722	0.0159363	0.0228872	0.0809075	Glycerophospholipid Biosynthetic Process
Response To Type II Interferon (GO:0034341)	3	56	251	23122	4.93497	0.0119522	0.022972	0.0809075	Response To Type II Interferon
Regulation Of Nitric-Oxide Synthase Activity (GO:0050999)	2	22	251	23122	8.3745	0.00796813	0.0235034	0.0817508	Regulation Of Nitric-Oxide Synthase Activity
Secondary Alcohol Biosynthetic Process (GO:1902653)	2	22	251	23122	8.3745	0.00796813	0.0235034	0.0817508	Secondary Alcohol Biosynthetic Process
Spliceosomal Complex Assembly (GO:0000245)	3	57	251	23122	4.8484	0.0119522	0.0240586	0.0826553	Spliceosomal Complex Assembly
Positive Regulation Of Organelle Assembly (GO:1902117)	3	57	251	23122	4.8484	0.0119522	0.0240586	0.0826553	Positive Regulation Of Organelle Assembly
Negative Regulation Of Transmembrane Receptor Protein Serine/Threonine Kinase Signaling Pathway (GO:0090101)	4	101	251	23122	3.6483	0.0159363	0.0244158	0.0833711	Negative Regulation Of Transmembrane Receptor Protein Serine/Threonine Kinase Signaling Pathway
Oxidative Phosphorylation (GO:0006119)	3	58	251	23122	4.7648	0.0119522	0.0251727	0.0841984	Oxidative Phosphorylation
Positive Regulation Of Interleukin-2 Production (GO:0032743)	2	23	251	23122	8.01039	0.00796813	0.0255602	0.0841984	Positive Regulation Of Interleukin-2 Production
Cholesterol Biosynthetic Process (GO:0006695)	2	23	251	23122	8.01039	0.00796813	0.0255602	0.0841984	Cholesterol Biosynthetic Process
Cellular Response To Interleukin-1 (GO:0071347)	3	58	251	23122	4.7648	0.0119522	0.0251727	0.0841984	Cellular Response To Interleukin-1
Negative Regulation Of Neurogenesis (GO:0050768)	2	23	251	23122	8.01039	0.00796813	0.0255602	0.0841984	Negative Regulation Of Neurogenesis
Positive Regulation Of Cell Cycle Process (GO:0090068)	4	102	251	23122	3.61253	0.0159363	0.0252028	0.0841984	Positive Regulation Of Cell Cycle Process
RNA Metabolic Process (GO:0016070)	4	103	251	23122	3.57746	0.0159363	0.0260048	0.085162	RNA Metabolic Process
Regulation Of Cellular Response To Stress (GO:0080135)	4	104	251	23122	3.54306	0.0159363	0.0268221	0.0856627	Regulation Of Cellular Response To Stress
Response To Interleukin-1 (GO:0070555)	3	60	251	23122	4.60598	0.0119522	0.0274829	0.0856627	Response To Interleukin-1
Phospholipid Biosynthetic Process (GO:0008654)	2	24	251	23122	7.67663	0.00796813	0.0276874	0.0856627	Phospholipid Biosynthetic Process
Negative Regulation Of Receptor-Mediated Endocytosis (GO:0048261)	2	24	251	23122	7.67663	0.00796813	0.0276874	0.0856627	Negative Regulation Of Receptor-Mediated Endocytosis
Regulation Of Cellular Catabolic Process (GO:0031329)	3	59	251	23122	4.68404	0.0119522	0.0263141	0.0856627	Regulation Of Cellular Catabolic Process
L-amino Acid Transport (GO:0015807)	2	24	251	23122	7.67663	0.00796813	0.0276874	0.0856627	L-amino Acid Transport
Negative Regulation Of Cell-Matrix Adhesion (GO:0001953)	2	24	251	23122	7.67663	0.00796813	0.0276874	0.0856627	Negative Regulation Of Cell-Matrix Adhesion
Positive Regulation Of Cellular Biosynthetic Process (GO:0031328)	5	155	251	23122	2.9716	0.0199203	0.0272629	0.0856627	Positive Regulation Of Cellular Biosynthetic Process
Lamellipodium Assembly (GO:0030032)	2	24	251	23122	7.67663	0.00796813	0.0276874	0.0856627	Lamellipodium Assembly
Lipid Droplet Organization (GO:0034389)	2	24	251	23122	7.67663	0.00796813	0.0276874	0.0856627	Lipid Droplet Organization
Regulation Of Protein Binding (GO:0043393)	4	106	251	23122	3.47621	0.0159363	0.0285024	0.0875142	Regulation Of Protein Binding
Peptidyl-Serine Modification (GO:0018209)	5	157	251	23122	2.93374	0.0199203	0.0285984	0.0875142	Peptidyl-Serine Modification
Establishment Of Endothelial Barrier (GO:0061028)	2	25	251	23122	7.36956	0.00796813	0.0298831	0.0890136	Establishment Of Endothelial Barrier
Response To Nutrient Levels (GO:0031667)	2	25	251	23122	7.36956	0.00796813	0.0298831	0.0890136	Response To Nutrient Levels
Positive Regulation Of Erythrocyte Differentiation (GO:0045648)	2	25	251	23122	7.36956	0.00796813	0.0298831	0.0890136	Positive Regulation Of Erythrocyte Differentiation
Regulation Of Potassium Ion Transmembrane Transporter Activity (GO:1901016)	2	25	251	23122	7.36956	0.00796813	0.0298831	0.0890136	Regulation Of Potassium Ion Transmembrane Transporter Activity
Mitotic G1 DNA Damage Checkpoint Signaling (GO:0031571)	2	25	251	23122	7.36956	0.00796813	0.0298831	0.0890136	Mitotic G1 DNA Damage Checkpoint Signaling
Regulation Of Small GTPase Mediated Signal Transduction (GO:0051056)	4	108	251	23122	3.41183	0.0159363	0.0302441	0.089612	Regulation Of Small GTPase Mediated Signal Transduction
Phagocytosis (GO:0006909)	3	63	251	23122	4.38664	0.0119522	0.0311528	0.0918189	Phagocytosis
Double-Strand Break Repair (GO:0006302)	5	161	251	23122	2.86085	0.0199203	0.0313921	0.0920396	Double-Strand Break Repair
Protein-Containing Complex Organization (GO:0043933)	4	110	251	23122	3.3498	0.0159363	0.0320473	0.0927917	Protein-Containing Complex Organization
Positive Regulation Of Cytokine Production Involved In Immune Response (GO:0002720)	2	26	251	23122	7.08612	0.00796813	0.0321457	0.0927917	Positive Regulation Of Cytokine Production Involved In Immune Response
Sterol Biosynthetic Process (GO:0016126)	2	26	251	23122	7.08612	0.00796813	0.0321457	0.0927917	Sterol Biosynthetic Process
Transmembrane Receptor Protein Serine/Threonine Kinase Signaling Pathway (GO:0007178)	4	111	251	23122	3.31962	0.0159363	0.0329721	0.0946891	Transmembrane Receptor Protein Serine/Threonine Kinase Signaling Pathway
Chromatin Organization (GO:0006325)	6	221	251	23122	2.50098	0.0239044	0.034024	0.0955698	Chromatin Organization
Protein Tetramerization (GO:0051262)	3	65	251	23122	4.25167	0.0119522	0.0337351	0.0955698	Protein Tetramerization
Response To Cytokine (GO:0034097)	4	112	251	23122	3.28998	0.0159363	0.0339124	0.0955698	Response To Cytokine
Negative Regulation Of DNA Binding (GO:0043392)	2	27	251	23122	6.82367	0.00796813	0.0344734	0.0955698	Negative Regulation Of DNA Binding
RNA Splicing, Via Transesterification Reactions With Bulged Adenosine As Nucleophile (GO:0000377)	5	164	251	23122	2.80852	0.0199203	0.0335958	0.0955698	RNA Splicing, Via Transesterification Reactions With Bulged Adenosine As Nucleophile
DNA Geometric Change (GO:0032392)	2	27	251	23122	6.82367	0.00796813	0.0344734	0.0955698	DNA Geometric Change
Heterotypic Cell-Cell Adhesion (GO:0034113)	2	27	251	23122	6.82367	0.00796813	0.0344734	0.0955698	Heterotypic Cell-Cell Adhesion
Cellular Response To Nutrient Levels (GO:0031669)	3	67	251	23122	4.12475	0.0119522	0.0364252	0.0980678	Cellular Response To Nutrient Levels
Negative Regulation Of Apoptotic Process (GO:0043066)	9	410	251	23122	2.02214	0.0358566	0.0357677	0.0980678	Negative Regulation Of Apoptotic Process
DNA-templated DNA Replication (GO:0006261)	3	67	251	23122	4.12475	0.0119522	0.0364252	0.0980678	DNA-templated DNA Replication
Monoatomic Cation Homeostasis (GO:0055080)	3	67	251	23122	4.12475	0.0119522	0.0364252	0.0980678	Monoatomic Cation Homeostasis
Endosomal Transport (GO:0016197)	5	167	251	23122	2.75807	0.0199203	0.0358935	0.0980678	Endosomal Transport
Proteolysis Involved In Protein Catabolic Process (GO:0051603)	3	67	251	23122	4.12475	0.0119522	0.0364252	0.0980678	Proteolysis Involved In Protein Catabolic Process
Establishment Of Mitotic Spindle Orientation (GO:0000132)	2	28	251	23122	6.57997	0.00796813	0.0368646	0.0987758	Establishment Of Mitotic Spindle Orientation
Receptor-Mediated Endocytosis (GO:0006898)	4	116	251	23122	3.17654	0.0159363	0.0378288	0.100877	Receptor-Mediated Endocytosis
Protein K63-linked Deubiquitination (GO:0070536)	2	29	251	23122	6.35307	0.00796813	0.0393175	0.100999	Protein K63-linked Deubiquitination
Positive Regulation Of Neurogenesis (GO:0050769)	3	69	251	23122	4.0052	0.0119522	0.0392221	0.100999	Positive Regulation Of Neurogenesis
Positive Regulation Of Lamellipodium Organization (GO:1902745)	2	29	251	23122	6.35307	0.00796813	0.0393175	0.100999	Positive Regulation Of Lamellipodium Organization
Protein Localization To Nucleus (GO:0034504)	4	117	251	23122	3.14939	0.0159363	0.0388468	0.100999	Protein Localization To Nucleus
Positive Regulation Of Neural Precursor Cell Proliferation (GO:2000179)	2	29	251	23122	6.35307	0.00796813	0.0393175	0.100999	Positive Regulation Of Neural Precursor Cell Proliferation
Lamellipodium Organization (GO:0097581)	2	29	251	23122	6.35307	0.00796813	0.0393175	0.100999	Lamellipodium Organization
Regulation Of Protein Modification By Small Protein Conjugation Or Removal (GO:1903320)	2	29	251	23122	6.35307	0.00796813	0.0393175	0.100999	Regulation Of Protein Modification By Small Protein Conjugation Or Removal
Import Into Nucleus (GO:0051170)	3	69	251	23122	4.0052	0.0119522	0.0392221	0.100999	Import Into Nucleus
Protein Transport (GO:0015031)	7	290	251	23122	2.22357	0.0278884	0.039602	0.101265	Protein Transport
Regulation Of Cell Cycle Process (GO:0010564)	4	118	251	23122	3.1227	0.0159363	0.0398803	0.101514	Regulation Of Cell Cycle Process
Positive Regulation Of RNA Splicing (GO:0033120)	2	30	251	23122	6.1413	0.00796813	0.0418307	0.103921	Positive Regulation Of RNA Splicing
Vesicle Budding From Membrane (GO:0006900)	2	30	251	23122	6.1413	0.00796813	0.0418307	0.103921	Vesicle Budding From Membrane
Positive Regulation Of Signaling Receptor Activity (GO:2000273)	2	30	251	23122	6.1413	0.00796813	0.0418307	0.103921	Positive Regulation Of Signaling Receptor Activity
NIK/NF-kappaB Signaling (GO:0038061)	2	30	251	23122	6.1413	0.00796813	0.0418307	0.103921	NIK/NF-kappaB Signaling
Negative Regulation Of Transforming Growth Factor Beta Receptor Signaling Pathway (GO:0030512)	3	71	251	23122	3.89237	0.0119522	0.0421251	0.103921	Negative Regulation Of Transforming Growth Factor Beta Receptor Signaling Pathway
Positive Regulation Of T Cell Mediated Immunity (GO:0002711)	2	30	251	23122	6.1413	0.00796813	0.0418307	0.103921	Positive Regulation Of T Cell Mediated Immunity
Response To Ionizing Radiation (GO:0010212)	3	71	251	23122	3.89237	0.0119522	0.0421251	0.103921	Response To Ionizing Radiation
Positive Regulation Of Nucleic Acid-Templated Transcription (GO:1903508)	10	492	251	23122	1.87235	0.0398406	0.0431985	0.105638	Positive Regulation Of Nucleic Acid-Templated Transcription
Regulation Of Cold-Induced Thermogenesis (GO:0120161)	4	121	251	23122	3.04527	0.0159363	0.0430744	0.105638	Regulation Of Cold-Induced Thermogenesis
Regulation Of DNA Recombination (GO:0000018)	2	31	251	23122	5.94319	0.00796813	0.0444026	0.10581	Regulation Of DNA Recombination
Vitamin Transport (GO:0051180)	2	31	251	23122	5.94319	0.00796813	0.0444026	0.10581	Vitamin Transport
Negative Regulation Of Cell-Substrate Adhesion (GO:0010812)	2	31	251	23122	5.94319	0.00796813	0.0444026	0.10581	Negative Regulation Of Cell-Substrate Adhesion
Regulation Of Receptor-Mediated Endocytosis (GO:0048259)	2	31	251	23122	5.94319	0.00796813	0.0444026	0.10581	Regulation Of Receptor-Mediated Endocytosis
ncRNA Catabolic Process (GO:0034661)	2	31	251	23122	5.94319	0.00796813	0.0444026	0.10581	ncRNA Catabolic Process
Keratinocyte Differentiation (GO:0030216)	2	31	251	23122	5.94319	0.00796813	0.0444026	0.10581	Keratinocyte Differentiation
Negative Regulation Of Mitotic Cell Cycle (GO:0045930)	2	32	251	23122	5.75747	0.00796813	0.0470315	0.108833	Negative Regulation Of Mitotic Cell Cycle
Sodium Ion Transport (GO:0006814)	3	74	251	23122	3.73458	0.0119522	0.046676	0.108833	Sodium Ion Transport
Regulation Of Metal Ion Transport (GO:0010959)	2	32	251	23122	5.75747	0.00796813	0.0470315	0.108833	Regulation Of Metal Ion Transport
Establishment Of Mitotic Spindle Localization (GO:0040001)	2	32	251	23122	5.75747	0.00796813	0.0470315	0.108833	Establishment Of Mitotic Spindle Localization
Negative Regulation Of JNK Cascade (GO:0046329)	2	32	251	23122	5.75747	0.00796813	0.0470315	0.108833	Negative Regulation Of JNK Cascade
ATP Metabolic Process (GO:0046034)	2	32	251	23122	5.75747	0.00796813	0.0470315	0.108833	ATP Metabolic Process
Regulation Of Osteoclast Differentiation (GO:0045670)	2	32	251	23122	5.75747	0.00796813	0.0470315	0.108833	Regulation Of Osteoclast Differentiation
Regulation Of Protein Localization To Plasma Membrane (GO:1903076)	3	75	251	23122	3.68478	0.0119522	0.0482448	0.111181	Regulation Of Protein Localization To Plasma Membrane
Establishment Of Spindle Orientation (GO:0051294)	2	33	251	23122	5.583	0.00796813	0.0497159	0.111915	Establishment Of Spindle Orientation
Ubiquitin-Dependent Protein Catabolic Process Via The Multivesicular Body Sorting Pathway (GO:0043162)	2	33	251	23122	5.583	0.00796813	0.0497159	0.111915	Ubiquitin-Dependent Protein Catabolic Process Via The Multivesicular Body Sorting Pathway
DNA Damage Response, Signal Transduction By P53 Class Mediator (GO:0030330)	2	33	251	23122	5.583	0.00796813	0.0497159	0.111915	DNA Damage Response, Signal Transduction By P53 Class Mediator
Cytokine-Mediated Signaling Pathway (GO:0019221)	5	183	251	23122	2.51693	0.0199203	0.0497621	0.111915	Cytokine-Mediated Signaling Pathway
Regulation Of mRNA Processing (GO:0050684)	2	33	251	23122	5.583	0.00796813	0.0497159	0.111915	Regulation Of mRNA Processing
Positive Regulation Of RNA Metabolic Process (GO:0051254)	2	33	251	23122	5.583	0.00796813	0.0497159	0.111915	Positive Regulation Of RNA Metabolic Process
Response To Lipopolysaccharide (GO:0032496)	4	128	251	23122	2.87874	0.0159363	0.0510717	0.114401	Response To Lipopolysaccharide
Macromolecule Catabolic Process (GO:0009057)	3	77	251	23122	3.58907	0.0119522	0.051459	0.114642	Macromolecule Catabolic Process
Plasma Membrane Bounded Cell Projection Assembly (GO:0120031)	6	245	251	23122	2.25599	0.0239044	0.0515889	0.114642	Plasma Membrane Bounded Cell Projection Assembly
Positive Regulation Of Myeloid Cell Differentiation (GO:0045639)	2	34	251	23122	5.4188	0.00796813	0.0524544	0.114744	Positive Regulation Of Myeloid Cell Differentiation
Regulation Of Erythrocyte Differentiation (GO:0045646)	2	34	251	23122	5.4188	0.00796813	0.0524544	0.114744	Regulation Of Erythrocyte Differentiation
Melanosome Organization (GO:0032438)	2	34	251	23122	5.4188	0.00796813	0.0524544	0.114744	Melanosome Organization
Negative Regulation Of Immune System Process (GO:0002683)	2	34	251	23122	5.4188	0.00796813	0.0524544	0.114744	Negative Regulation Of Immune System Process
Positive Regulation Of Protein Kinase Activity (GO:0045860)	4	130	251	23122	2.83445	0.0159363	0.053496	0.116567	Positive Regulation Of Protein Kinase Activity
Establishment Of Protein Localization To Organelle (GO:0072594)	3	79	251	23122	3.49821	0.0119522	0.0547745	0.11889	Establishment Of Protein Localization To Organelle
Response To cAMP (GO:0051591)	2	35	251	23122	5.26397	0.00796813	0.0552454	0.11945	Response To cAMP
Response To Tumor Necrosis Factor (GO:0034612)	3	80	251	23122	3.45448	0.0119522	0.0564697	0.119784	Response To Tumor Necrosis Factor
Ribosomal Small Subunit Biogenesis (GO:0042274)	3	80	251	23122	3.45448	0.0119522	0.0564697	0.119784	Ribosomal Small Subunit Biogenesis
Regulation Of Cell Migration (GO:0030334)	8	379	251	23122	1.94448	0.0318725	0.0556791	0.119784	Regulation Of Cell Migration
mRNA Metabolic Process (GO:0016071)	3	80	251	23122	3.45448	0.0119522	0.0564697	0.119784	mRNA Metabolic Process
Cellular Respiration (GO:0045333)	3	80	251	23122	3.45448	0.0119522	0.0564697	0.119784	Cellular Respiration
Regulation Of Protein Targeting To Mitochondrion (GO:1903214)	2	36	251	23122	5.11775	0.00796813	0.0580875	0.12069	Regulation Of Protein Targeting To Mitochondrion
L-alpha-amino Acid Transmembrane Transport (GO:1902475)	2	36	251	23122	5.11775	0.00796813	0.0580875	0.12069	L-alpha-amino Acid Transmembrane Transport
Endothelial Cell Migration (GO:0043542)	2	36	251	23122	5.11775	0.00796813	0.0580875	0.12069	Endothelial Cell Migration
Positive Regulation Of Binding (GO:0051099)	3	81	251	23122	3.41183	0.0119522	0.0581897	0.12069	Positive Regulation Of Binding
Carboxylic Acid Transmembrane Transport (GO:1905039)	2	36	251	23122	5.11775	0.00796813	0.0580875	0.12069	Carboxylic Acid Transmembrane Transport
Tumor Necrosis Factor-Mediated Signaling Pathway (GO:0033209)	2	36	251	23122	5.11775	0.00796813	0.0580875	0.12069	Tumor Necrosis Factor-Mediated Signaling Pathway
Axonal Transport (GO:0098930)	2	37	251	23122	4.97943	0.00796813	0.0609794	0.123726	Axonal Transport
Regulation Of Small Molecule Metabolic Process (GO:0062012)	2	37	251	23122	4.97943	0.00796813	0.0609794	0.123726	Regulation Of Small Molecule Metabolic Process
Amino Acid Transmembrane Transport (GO:0003333)	2	37	251	23122	4.97943	0.00796813	0.0609794	0.123726	Amino Acid Transmembrane Transport
Cellular Response To Glucose Starvation (GO:0042149)	2	37	251	23122	4.97943	0.00796813	0.0609794	0.123726	Cellular Response To Glucose Starvation
Negative Regulation Of Protein Localization (GO:1903828)	2	37	251	23122	4.97943	0.00796813	0.0609794	0.123726	Negative Regulation Of Protein Localization
Organelle Transport Along Microtubule (GO:0072384)	2	37	251	23122	4.97943	0.00796813	0.0609794	0.123726	Organelle Transport Along Microtubule
Mitochondrial Respiratory Chain Complex Assembly (GO:0033108)	3	83	251	23122	3.32962	0.0119522	0.0617031	0.124743	Mitochondrial Respiratory Chain Complex Assembly
Negative Regulation Of Multicellular Organismal Process (GO:0051241)	5	195	251	23122	2.36204	0.0199203	0.0619699	0.124831	Negative Regulation Of Multicellular Organismal Process
Regulation Of Amide Metabolic Process (GO:0034248)	2	38	251	23122	4.8484	0.00796813	0.0639194	0.125157	Regulation Of Amide Metabolic Process
Response To Amino Acid Starvation (GO:1990928)	2	38	251	23122	4.8484	0.00796813	0.0639194	0.125157	Response To Amino Acid Starvation
Protein Localization To Chromosome (GO:0034502)	2	38	251	23122	4.8484	0.00796813	0.0639194	0.125157	Protein Localization To Chromosome
Positive Regulation Of Stem Cell Population Maintenance (GO:1902459)	2	38	251	23122	4.8484	0.00796813	0.0639194	0.125157	Positive Regulation Of Stem Cell Population Maintenance
DNA Integrity Checkpoint Signaling (GO:0031570)	2	38	251	23122	4.8484	0.00796813	0.0639194	0.125157	DNA Integrity Checkpoint Signaling
Positive Regulation Of Leukocyte Cell-Cell Adhesion (GO:1903039)	2	38	251	23122	4.8484	0.00796813	0.0639194	0.125157	Positive Regulation Of Leukocyte Cell-Cell Adhesion
Retrograde Transport, Endosome To Golgi (GO:0042147)	3	84	251	23122	3.28998	0.0119522	0.0634962	0.125157	Retrograde Transport, Endosome To Golgi
Regulation Of Macroautophagy (GO:0016241)	3	84	251	23122	3.28998	0.0119522	0.0634962	0.125157	Regulation Of Macroautophagy
Energy Derivation By Oxidation Of Organic Compounds (GO:0015980)	2	39	251	23122	4.72408	0.00796813	0.0669064	0.128755	Energy Derivation By Oxidation Of Organic Compounds
I-kappaB kinase/NF-kappaB Signaling (GO:0007249)	2	39	251	23122	4.72408	0.00796813	0.0669064	0.128755	I-kappaB kinase/NF-kappaB Signaling
Water-Soluble Vitamin Metabolic Process (GO:0006767)	2	39	251	23122	4.72408	0.00796813	0.0669064	0.128755	Water-Soluble Vitamin Metabolic Process
mRNA 3'-End Processing (GO:0031124)	2	39	251	23122	4.72408	0.00796813	0.0669064	0.128755	mRNA 3'-End Processing
Cellular Response To Amino Acid Starvation (GO:0034198)	2	39	251	23122	4.72408	0.00796813	0.0669064	0.128755	Cellular Response To Amino Acid Starvation
mRNA Transcription (GO:0009299)	2	40	251	23122	4.60598	0.00796813	0.0699389	0.130553	mRNA Transcription
Regulation Of Interleukin-2 Production (GO:0032663)	2	40	251	23122	4.60598	0.00796813	0.0699389	0.130553	Regulation Of Interleukin-2 Production
Apoptotic Process (GO:0006915)	5	202	251	23122	2.28019	0.0199203	0.0698065	0.130553	Apoptotic Process
Nitrogen Compound Transport (GO:0071705)	4	142	251	23122	2.59492	0.0159363	0.0693253	0.130553	Nitrogen Compound Transport
Epidermal Cell Differentiation (GO:0009913)	2	40	251	23122	4.60598	0.00796813	0.0699389	0.130553	Epidermal Cell Differentiation
Erythrocyte Differentiation (GO:0030218)	2	40	251	23122	4.60598	0.00796813	0.0699389	0.130553	Erythrocyte Differentiation
Epithelial Cell Migration (GO:0010631)	2	40	251	23122	4.60598	0.00796813	0.0699389	0.130553	Epithelial Cell Migration
Regulation Of Protein Secretion (GO:0050708)	3	87	251	23122	3.17654	0.0119522	0.0690184	0.130553	Regulation Of Protein Secretion
Positive Regulation Of TOR Signaling (GO:0032008)	2	40	251	23122	4.60598	0.00796813	0.0699389	0.130553	Positive Regulation Of TOR Signaling
Protein Catabolic Process (GO:0030163)	3	88	251	23122	3.14044	0.0119522	0.070906	0.130956	Protein Catabolic Process
Negative Regulation Of Programmed Cell Death (GO:0043069)	7	332	251	23122	1.94228	0.0278884	0.0710903	0.130956	Negative Regulation Of Programmed Cell Death
Activation Of GTPase Activity (GO:0090630)	3	88	251	23122	3.14044	0.0119522	0.070906	0.130956	Activation Of GTPase Activity
Phosphatidylinositol Biosynthetic Process (GO:0006661)	3	88	251	23122	3.14044	0.0119522	0.070906	0.130956	Phosphatidylinositol Biosynthetic Process
Positive Regulation Of Protein-Containing Complex Assembly (GO:0031334)	3	89	251	23122	3.10515	0.0119522	0.0728168	0.131475	Positive Regulation Of Protein-Containing Complex Assembly
Regulation Of Cytokine Production Involved In Inflammatory Response (GO:1900015)	2	41	251	23122	4.49364	0.00796813	0.0730156	0.131475	Regulation Of Cytokine Production Involved In Inflammatory Response
Regulation Of Cellular Component Size (GO:0032535)	2	41	251	23122	4.49364	0.00796813	0.0730156	0.131475	Regulation Of Cellular Component Size
Response To Hydrogen Peroxide (GO:0042542)	2	41	251	23122	4.49364	0.00796813	0.0730156	0.131475	Response To Hydrogen Peroxide
Positive Regulation Of Nucleocytoplasmic Transport (GO:0046824)	2	41	251	23122	4.49364	0.00796813	0.0730156	0.131475	Positive Regulation Of Nucleocytoplasmic Transport
Negative Regulation Of I-kappaB kinase/NF-kappaB Signaling (GO:0043124)	2	41	251	23122	4.49364	0.00796813	0.0730156	0.131475	Negative Regulation Of I-kappaB kinase/NF-kappaB Signaling
Negative Regulation Of Cold-Induced Thermogenesis (GO:0120163)	2	41	251	23122	4.49364	0.00796813	0.0730156	0.131475	Negative Regulation Of Cold-Induced Thermogenesis
Positive Regulation Of Gene Expression (GO:0010628)	8	404	251	23122	1.82415	0.0318725	0.0745916	0.133882	Positive Regulation Of Gene Expression
Cellular Response To Radiation (GO:0071478)	2	42	251	23122	4.38664	0.00796813	0.0761352	0.135351	Cellular Response To Radiation
Positive Regulation Of Nervous System Development (GO:0051962)	2	42	251	23122	4.38664	0.00796813	0.0761352	0.135351	Positive Regulation Of Nervous System Development
Eye Development (GO:0001654)	2	42	251	23122	4.38664	0.00796813	0.0761352	0.135351	Eye Development
Cellular Response To Tumor Necrosis Factor (GO:0071356)	3	91	251	23122	3.03691	0.0119522	0.0767067	0.135936	Cellular Response To Tumor Necrosis Factor
Regulation Of Intracellular Signal Transduction (GO:1902531)	6	273	251	23122	2.0246	0.0239044	0.0780028	0.137797	Regulation Of Intracellular Signal Transduction
Cellular Response To Molecule Of Bacterial Origin (GO:0071219)	3	92	251	23122	3.0039	0.0119522	0.0786854	0.138131	Cellular Response To Molecule Of Bacterial Origin
Response To UV (GO:0009411)	3	92	251	23122	3.0039	0.0119522	0.0786854	0.138131	Response To UV
Intracellular Iron Ion Homeostasis (GO:0006879)	2	43	251	23122	4.28463	0.00796813	0.0792964	0.138769	Intracellular Iron Ion Homeostasis
Regulation Of Epithelial Cell Migration (GO:0010632)	2	44	251	23122	4.18725	0.00796813	0.082498	0.142589	Regulation Of Epithelial Cell Migration
Regulation Of Signal Transduction By P53 Class Mediator (GO:1901796)	2	44	251	23122	4.18725	0.00796813	0.082498	0.142589	Regulation Of Signal Transduction By P53 Class Mediator
Mitotic G2/M Transition Checkpoint (GO:0044818)	2	44	251	23122	4.18725	0.00796813	0.082498	0.142589	Mitotic G2/M Transition Checkpoint
Protein Sumoylation (GO:0016925)	2	44	251	23122	4.18725	0.00796813	0.082498	0.142589	Protein Sumoylation
Positive Regulation Of Vasculature Development (GO:1904018)	3	95	251	23122	2.90904	0.0119522	0.0847537	0.145056	Positive Regulation Of Vasculature Development
Negative Regulation Of MAP Kinase Activity (GO:0043407)	2	45	251	23122	4.0942	0.00796813	0.0857386	0.145056	Negative Regulation Of MAP Kinase Activity
Golgi To Plasma Membrane Transport (GO:0006893)	2	45	251	23122	4.0942	0.00796813	0.0857386	0.145056	Golgi To Plasma Membrane Transport
Carboxylic Acid Transport (GO:0046942)	2	45	251	23122	4.0942	0.00796813	0.0857386	0.145056	Carboxylic Acid Transport
Regulation Of Cell Communication (GO:0010646)	2	45	251	23122	4.0942	0.00796813	0.0857386	0.145056	Regulation Of Cell Communication
Regulation Of Cell Development (GO:0060284)	2	45	251	23122	4.0942	0.00796813	0.0857386	0.145056	Regulation Of Cell Development
Epithelial To Mesenchymal Transition (GO:0001837)	2	45	251	23122	4.0942	0.00796813	0.0857386	0.145056	Epithelial To Mesenchymal Transition
Regulation Of Organelle Organization (GO:0033043)	3	96	251	23122	2.87874	0.0119522	0.0868197	0.145566	Regulation Of Organelle Organization
Mitochondrial Translation (GO:0032543)	3	96	251	23122	2.87874	0.0119522	0.0868197	0.145566	Mitochondrial Translation
ncRNA Processing (GO:0034470)	3	96	251	23122	2.87874	0.0119522	0.0868197	0.145566	ncRNA Processing
rRNA Processing (GO:0006364)	3	97	251	23122	2.84906	0.0119522	0.088907	0.146187	rRNA Processing
Positive Regulation Of Transcription Initiation By RNA Polymerase II (GO:0060261)	2	46	251	23122	4.0052	0.00796813	0.0890172	0.146187	Positive Regulation Of Transcription Initiation By RNA Polymerase II
Positive Regulation Of Wnt Signaling Pathway (GO:0030177)	3	97	251	23122	2.84906	0.0119522	0.088907	0.146187	Positive Regulation Of Wnt Signaling Pathway
Myeloid Cell Differentiation (GO:0030099)	2	46	251	23122	4.0052	0.00796813	0.0890172	0.146187	Myeloid Cell Differentiation
Cell-Matrix Adhesion (GO:0007160)	3	97	251	23122	2.84906	0.0119522	0.088907	0.146187	Cell-Matrix Adhesion
Response To Calcium Ion (GO:0051592)	3	97	251	23122	2.84906	0.0119522	0.088907	0.146187	Response To Calcium Ion
Negative Regulation Of Cytokine-Mediated Signaling Pathway (GO:0001960)	2	46	251	23122	4.0052	0.00796813	0.0890172	0.146187	Negative Regulation Of Cytokine-Mediated Signaling Pathway
Regulation Of Endopeptidase Activity (GO:0052548)	2	47	251	23122	3.91998	0.00796813	0.0923324	0.148581	Regulation Of Endopeptidase Activity
Intrinsic Apoptotic Signaling Pathway In Response To DNA Damage (GO:0008630)	2	47	251	23122	3.91998	0.00796813	0.0923324	0.148581	Intrinsic Apoptotic Signaling Pathway In Response To DNA Damage
Nuclear Export (GO:0051168)	2	47	251	23122	3.91998	0.00796813	0.0923324	0.148581	Nuclear Export
Negative Regulation Of Metabolic Process (GO:0009892)	2	47	251	23122	3.91998	0.00796813	0.0923324	0.148581	Negative Regulation Of Metabolic Process
Neurotransmitter Transport (GO:0006836)	2	47	251	23122	3.91998	0.00796813	0.0923324	0.148581	Neurotransmitter Transport
Post-Translational Protein Modification (GO:0043687)	2	47	251	23122	3.91998	0.00796813	0.0923324	0.148581	Post-Translational Protein Modification
Protein Homotetramerization (GO:0051289)	2	47	251	23122	3.91998	0.00796813	0.0923324	0.148581	Protein Homotetramerization
Cellular Response To Lipopolysaccharide (GO:0071222)	3	99	251	23122	2.7915	0.0119522	0.0931443	0.149458	Cellular Response To Lipopolysaccharide
Regulation Of Proteasomal Ubiquitin-Dependent Protein Catabolic Process (GO:0032434)	3	100	251	23122	2.76359	0.0119522	0.0952938	0.150937	Regulation Of Proteasomal Ubiquitin-Dependent Protein Catabolic Process
Positive Regulation Of Cysteine-Type Endopeptidase Activity Involved In Apoptotic Process (GO:0043280)	3	100	251	23122	2.76359	0.0119522	0.0952938	0.150937	Positive Regulation Of Cysteine-Type Endopeptidase Activity Involved In Apoptotic Process
Negative Regulation Of Viral Genome Replication (GO:0045071)	2	48	251	23122	3.83831	0.00796813	0.0956832	0.150937	Negative Regulation Of Viral Genome Replication
Positive Regulation Of DNA Metabolic Process (GO:0051054)	3	100	251	23122	2.76359	0.0119522	0.0952938	0.150937	Positive Regulation Of DNA Metabolic Process
Dicarboxylic Acid Metabolic Process (GO:0043648)	2	48	251	23122	3.83831	0.00796813	0.0956832	0.150937	Dicarboxylic Acid Metabolic Process
Macroautophagy (GO:0016236)	3	100	251	23122	2.76359	0.0119522	0.0952938	0.150937	Macroautophagy
Mitochondrial Gene Expression (GO:0140053)	3	101	251	23122	2.73622	0.0119522	0.0974635	0.152884	Mitochondrial Gene Expression
Regulation Of Transforming Growth Factor Beta Receptor Signaling Pathway (GO:0017015)	3	101	251	23122	2.73622	0.0119522	0.0974635	0.152884	Regulation Of Transforming Growth Factor Beta Receptor Signaling Pathway
Negative Regulation Of Protein-Containing Complex Assembly (GO:0031333)	2	49	251	23122	3.75998	0.00796813	0.0990683	0.154536	Negative Regulation Of Protein-Containing Complex Assembly
Peptide Metabolic Process (GO:0006518)	2	49	251	23122	3.75998	0.00796813	0.0990683	0.154536	Peptide Metabolic Process
Regulation Of Protein Ubiquitination (GO:0031396)	3	102	251	23122	2.7094	0.0119522	0.0996532	0.155016	Regulation Of Protein Ubiquitination
Cellular Component Assembly (GO:0022607)	5	226	251	23122	2.03804	0.0199203	0.100585	0.156032	Cellular Component Assembly
Regulation Of Alternative mRNA Splicing, Via Spliceosome (GO:0000381)	2	50	251	23122	3.68478	0.00796813	0.102487	0.157672	Regulation Of Alternative mRNA Splicing, Via Spliceosome
Regulation Of Phagocytosis (GO:0050764)	2	50	251	23122	3.68478	0.00796813	0.102487	0.157672	Regulation Of Phagocytosis
Proton Motive Force-Driven Mitochondrial ATP Synthesis (GO:0042776)	2	50	251	23122	3.68478	0.00796813	0.102487	0.157672	Proton Motive Force-Driven Mitochondrial ATP Synthesis
Organelle Disassembly (GO:1903008)	2	51	251	23122	3.61253	0.00796813	0.105937	0.16209	Organelle Disassembly
Regulation Of Transcription Initiation By RNA Polymerase II (GO:0060260)	2	51	251	23122	3.61253	0.00796813	0.105937	0.16209	Regulation Of Transcription Initiation By RNA Polymerase II
Endoplasmic Reticulum To Golgi Vesicle-Mediated Transport (GO:0006888)	3	105	251	23122	2.63199	0.0119522	0.10634	0.162262	Endoplasmic Reticulum To Golgi Vesicle-Mediated Transport
Positive Regulation Of Macromolecule Biosynthetic Process (GO:0010557)	3	106	251	23122	2.60716	0.0119522	0.108607	0.164823	Positive Regulation Of Macromolecule Biosynthetic Process
Double-Strand Break Repair Via Homologous Recombination (GO:0000724)	3	106	251	23122	2.60716	0.0119522	0.108607	0.164823	Double-Strand Break Repair Via Homologous Recombination
Regulation Of T Cell Activation (GO:0050863)	2	52	251	23122	3.54306	0.00796813	0.109419	0.16528	Regulation Of T Cell Activation
Negative Regulation Of Gene Expression (GO:0010629)	6	300	251	23122	1.84239	0.0239044	0.109498	0.16528	Negative Regulation Of Gene Expression
Vesicle-Mediated Transport (GO:0016192)	7	371	251	23122	1.7381	0.0278884	0.110712	0.166664	Vesicle-Mediated Transport
Negative Regulation Of Viral Process (GO:0048525)	2	53	251	23122	3.47621	0.00796813	0.11293	0.169093	Negative Regulation Of Viral Process
Cholesterol Metabolic Process (GO:0008203)	2	53	251	23122	3.47621	0.00796813	0.11293	0.169093	Cholesterol Metabolic Process
Positive Regulation Of Angiogenesis (GO:0045766)	3	109	251	23122	2.5354	0.0119522	0.115519	0.17119	Positive Regulation Of Angiogenesis
Cellular Response To Starvation (GO:0009267)	3	109	251	23122	2.5354	0.0119522	0.115519	0.17119	Cellular Response To Starvation
RNA Catabolic Process (GO:0006401)	2	54	251	23122	3.41183	0.00796813	0.116471	0.17119	RNA Catabolic Process
Regulation Of Multicellular Organismal Development (GO:2000026)	2	54	251	23122	3.41183	0.00796813	0.116471	0.17119	Regulation Of Multicellular Organismal Development
Protein Lipidation (GO:0006497)	2	54	251	23122	3.41183	0.00796813	0.116471	0.17119	Protein Lipidation
Regulation Of Stem Cell Population Maintenance (GO:2000036)	2	54	251	23122	3.41183	0.00796813	0.116471	0.17119	Regulation Of Stem Cell Population Maintenance
Phospholipid Metabolic Process (GO:0006644)	2	54	251	23122	3.41183	0.00796813	0.116471	0.17119	Phospholipid Metabolic Process
Regulation Of Angiogenesis (GO:0045765)	4	173	251	23122	2.12993	0.0159363	0.119803	0.173699	Regulation Of Angiogenesis
Proton Motive Force-Driven ATP Synthesis (GO:0015986)	2	55	251	23122	3.3498	0.00796813	0.120039	0.173699	Proton Motive Force-Driven ATP Synthesis
Aerobic Respiration (GO:0009060)	2	55	251	23122	3.3498	0.00796813	0.120039	0.173699	Aerobic Respiration
Peptidyl-Threonine Phosphorylation (GO:0018107)	2	55	251	23122	3.3498	0.00796813	0.120039	0.173699	Peptidyl-Threonine Phosphorylation
Regulation Of Cell-Matrix Adhesion (GO:0001952)	2	55	251	23122	3.3498	0.00796813	0.120039	0.173699	Regulation Of Cell-Matrix Adhesion
Skin Development (GO:0043588)	2	55	251	23122	3.3498	0.00796813	0.120039	0.173699	Skin Development
DNA-templated Transcription Initiation (GO:0006352)	2	56	251	23122	3.28998	0.00796813	0.123634	0.177071	DNA-templated Transcription Initiation
Regulation Of Actin Filament Polymerization (GO:0030833)	2	56	251	23122	3.28998	0.00796813	0.123634	0.177071	Regulation Of Actin Filament Polymerization
Transcription By RNA Polymerase II (GO:0006366)	4	175	251	23122	2.10559	0.0159363	0.123494	0.177071	Transcription By RNA Polymerase II
Regulation Of Neuron Death (GO:1901214)	2	56	251	23122	3.28998	0.00796813	0.123634	0.177071	Regulation Of Neuron Death
Response To Metal Ion (GO:0010038)	2	57	251	23122	3.23226	0.00796813	0.127255	0.180412	Response To Metal Ion
Phosphatidylinositol Metabolic Process (GO:0046488)	2	57	251	23122	3.23226	0.00796813	0.127255	0.180412	Phosphatidylinositol Metabolic Process
Telomere Organization (GO:0032200)	2	57	251	23122	3.23226	0.00796813	0.127255	0.180412	Telomere Organization
Regulation Of Embryonic Development (GO:0045995)	2	57	251	23122	3.23226	0.00796813	0.127255	0.180412	Regulation Of Embryonic Development
Protein Homooligomerization (GO:0051260)	3	115	251	23122	2.40312	0.0119522	0.129821	0.183585	Protein Homooligomerization
Positive Regulation Of Apoptotic Process (GO:0043065)	5	246	251	23122	1.87235	0.0199203	0.130603	0.184226	Positive Regulation Of Apoptotic Process
Regulation Of Heart Contraction (GO:0008016)	2	59	251	23122	3.1227	0.00796813	0.13457	0.189345	Regulation Of Heart Contraction
Regulation Of Immune Response (GO:0050776)	2	60	251	23122	3.07065	0.00796813	0.138263	0.194053	Regulation Of Immune Response
Phosphorylation (GO:0016310)	7	394	251	23122	1.63664	0.0278884	0.138611	0.194055	Phosphorylation
RNA Methylation (GO:0001510)	2	61	251	23122	3.02031	0.00796813	0.141978	0.196315	RNA Methylation
Protein Localization (GO:0008104)	6	323	251	23122	1.7112	0.0239044	0.140731	0.196315	Protein Localization
Negative Regulation Of Catabolic Process (GO:0009895)	2	61	251	23122	3.02031	0.00796813	0.141978	0.196315	Negative Regulation Of Catabolic Process
Regulation Of Endocytosis (GO:0030100)	2	61	251	23122	3.02031	0.00796813	0.141978	0.196315	Regulation Of Endocytosis
Activation Of Cysteine-Type Endopeptidase Activity Involved In Apoptotic Process (GO:0006919)	2	61	251	23122	3.02031	0.00796813	0.141978	0.196315	Activation Of Cysteine-Type Endopeptidase Activity Involved In Apoptotic Process
Extrinsic Apoptotic Signaling Pathway (GO:0097191)	2	62	251	23122	2.9716	0.00796813	0.145713	0.199023	Extrinsic Apoptotic Signaling Pathway
Positive Regulation Of Protein Transport (GO:0051222)	2	62	251	23122	2.9716	0.00796813	0.145713	0.199023	Positive Regulation Of Protein Transport
Regulation Of Protein Kinase B Signaling (GO:0051896)	3	121	251	23122	2.28396	0.0119522	0.14471	0.199023	Regulation Of Protein Kinase B Signaling
Transmembrane Receptor Protein Tyrosine Kinase Signaling Pathway (GO:0007169)	5	255	251	23122	1.80627	0.0199203	0.145298	0.199023	Transmembrane Receptor Protein Tyrosine Kinase Signaling Pathway
Negative Regulation Of Epithelial Cell Proliferation (GO:0050680)	2	62	251	23122	2.9716	0.00796813	0.145713	0.199023	Negative Regulation Of Epithelial Cell Proliferation
Telomere Maintenance (GO:0000723)	2	63	251	23122	2.92443	0.00796813	0.149469	0.200246	Telomere Maintenance
Regulation Of G Protein-Coupled Receptor Signaling Pathway (GO:0008277)	2	63	251	23122	2.92443	0.00796813	0.149469	0.200246	Regulation Of G Protein-Coupled Receptor Signaling Pathway
Positive Regulation Of Cytokine Production (GO:0001819)	5	257	251	23122	1.79221	0.0199203	0.148657	0.200246	Positive Regulation Of Cytokine Production
Regulation Of Cellular Localization (GO:0060341)	2	63	251	23122	2.92443	0.00796813	0.149469	0.200246	Regulation Of Cellular Localization
Peptidyl-Threonine Modification (GO:0018210)	2	63	251	23122	2.92443	0.00796813	0.149469	0.200246	Peptidyl-Threonine Modification
Transcription Initiation At RNA Polymerase II Promoter (GO:0006367)	2	63	251	23122	2.92443	0.00796813	0.149469	0.200246	Transcription Initiation At RNA Polymerase II Promoter
Aerobic Electron Transport Chain (GO:0019646)	2	63	251	23122	2.92443	0.00796813	0.149469	0.200246	Aerobic Electron Transport Chain
Negative Regulation Of Protein Metabolic Process (GO:0051248)	3	122	251	23122	2.26523	0.0119522	0.147245	0.200246	Negative Regulation Of Protein Metabolic Process
Positive Regulation Of Protein Secretion (GO:0050714)	2	64	251	23122	2.87874	0.00796813	0.153245	0.201923	Positive Regulation Of Protein Secretion
Protein Targeting To Membrane (GO:0006612)	2	64	251	23122	2.87874	0.00796813	0.153245	0.201923	Protein Targeting To Membrane
B Cell Activation (GO:0042113)	2	64	251	23122	2.87874	0.00796813	0.153245	0.201923	B Cell Activation
Positive Regulation Of Secretion By Cell (GO:1903532)	2	64	251	23122	2.87874	0.00796813	0.153245	0.201923	Positive Regulation Of Secretion By Cell
Regulation Of Double-Strand Break Repair Via Homologous Recombination (GO:0010569)	2	64	251	23122	2.87874	0.00796813	0.153245	0.201923	Regulation Of Double-Strand Break Repair Via Homologous Recombination
Regulation Of Cellular Biosynthetic Process (GO:0031326)	2	64	251	23122	2.87874	0.00796813	0.153245	0.201923	Regulation Of Cellular Biosynthetic Process
Mitochondrial ATP Synthesis Coupled Electron Transport (GO:0042775)	2	64	251	23122	2.87874	0.00796813	0.153245	0.201923	Mitochondrial ATP Synthesis Coupled Electron Transport
Regulation Of DNA Repair (GO:0006282)	3	125	251	23122	2.21087	0.0119522	0.154934	0.203669	Regulation Of DNA Repair
Positive Regulation Of Endocytosis (GO:0045807)	2	65	251	23122	2.83445	0.00796813	0.157039	0.204516	Positive Regulation Of Endocytosis
Negative Regulation Of Neuron Apoptotic Process (GO:0043524)	2	65	251	23122	2.83445	0.00796813	0.157039	0.204516	Negative Regulation Of Neuron Apoptotic Process
Positive Regulation Of Cytoskeleton Organization (GO:0051495)	2	65	251	23122	2.83445	0.00796813	0.157039	0.204516	Positive Regulation Of Cytoskeleton Organization
Regulation Of Hydrolase Activity (GO:0051336)	2	65	251	23122	2.83445	0.00796813	0.157039	0.204516	Regulation Of Hydrolase Activity
Regulation Of NIK/NF-kappaB Signaling (GO:1901222)	2	66	251	23122	2.7915	0.00796813	0.160851	0.206597	Regulation Of NIK/NF-kappaB Signaling
Cellular Response To Organic Substance (GO:0071310)	2	66	251	23122	2.7915	0.00796813	0.160851	0.206597	Cellular Response To Organic Substance
Positive Regulation Of Cell Population Proliferation (GO:0008284)	7	410	251	23122	1.57277	0.0278884	0.159854	0.206597	Positive Regulation Of Cell Population Proliferation
Regulation Of Cell Adhesion (GO:0030155)	3	127	251	23122	2.17605	0.0119522	0.160129	0.206597	Regulation Of Cell Adhesion
Regulation Of Organelle Assembly (GO:1902115)	2	66	251	23122	2.7915	0.00796813	0.160851	0.206597	Regulation Of Organelle Assembly
Negative Regulation Of Supramolecular Fiber Organization (GO:1902904)	2	66	251	23122	2.7915	0.00796813	0.160851	0.206597	Negative Regulation Of Supramolecular Fiber Organization
Negative Regulation Of Cell Population Proliferation (GO:0008285)	6	337	251	23122	1.64011	0.0239044	0.161558	0.20703	Negative Regulation Of Cell Population Proliferation
Regulation Of TOR Signaling (GO:0032006)	2	67	251	23122	2.74984	0.00796813	0.164679	0.210548	Regulation Of TOR Signaling
Positive Regulation Of Cellular Process (GO:0048522)	8	492	251	23122	1.49788	0.0318725	0.16811	0.213514	Positive Regulation Of Cellular Process
Plasma Membrane Organization (GO:0007009)	2	68	251	23122	2.7094	0.00796813	0.168524	0.213514	Plasma Membrane Organization
Organonitrogen Compound Catabolic Process (GO:1901565)	2	68	251	23122	2.7094	0.00796813	0.168524	0.213514	Organonitrogen Compound Catabolic Process
Regulation Of DNA Replication (GO:0006275)	2	68	251	23122	2.7094	0.00796813	0.168524	0.213514	Regulation Of DNA Replication
Neuron Development (GO:0048666)	3	131	251	23122	2.10961	0.0119522	0.170675	0.215752	Neuron Development
Cell Morphogenesis Involved In Neuron Differentiation (GO:0048667)	2	69	251	23122	2.67013	0.00796813	0.172383	0.216932	Cell Morphogenesis Involved In Neuron Differentiation
Ubiquitin-Dependent ERAD Pathway (GO:0030433)	2	69	251	23122	2.67013	0.00796813	0.172383	0.216932	Ubiquitin-Dependent ERAD Pathway
Positive Regulation Of NF-kappaB Transcription Factor Activity (GO:0051092)	3	133	251	23122	2.07788	0.0119522	0.176021	0.220322	Positive Regulation Of NF-kappaB Transcription Factor Activity
Sodium Ion Transmembrane Transport (GO:0035725)	2	70	251	23122	2.63199	0.00796813	0.176257	0.220322	Sodium Ion Transmembrane Transport
Ras Protein Signal Transduction (GO:0007265)	3	133	251	23122	2.07788	0.0119522	0.176021	0.220322	Ras Protein Signal Transduction
Chromatin Remodeling (GO:0006338)	4	205	251	23122	1.79745	0.0159363	0.184117	0.229124	Chromatin Remodeling
Negative Regulation Of Protein Modification Process (GO:0031400)	2	72	251	23122	2.55888	0.00796813	0.184046	0.229124	Negative Regulation Of Protein Modification Process
Negative Regulation Of Phosphorylation (GO:0042326)	2	73	251	23122	2.52382	0.00796813	0.187959	0.233386	Negative Regulation Of Phosphorylation
Positive Regulation Of Developmental Process (GO:0051094)	4	208	251	23122	1.77153	0.0159363	0.190653	0.236165	Positive Regulation Of Developmental Process
Macromolecule Modification (GO:0043412)	2	74	251	23122	2.48972	0.00796813	0.191884	0.236165	Macromolecule Modification
Glycoprotein Biosynthetic Process (GO:0009101)	2	74	251	23122	2.48972	0.00796813	0.191884	0.236165	Glycoprotein Biosynthetic Process
Regulation Of Cell Division (GO:0051302)	2	74	251	23122	2.48972	0.00796813	0.191884	0.236165	Regulation Of Cell Division
Regulation Of Cellular Component Organization (GO:0051128)	3	140	251	23122	1.97399	0.0119522	0.195084	0.239429	Regulation Of Cellular Component Organization
Vesicle-Mediated Transport To The Plasma Membrane (GO:0098876)	2	75	251	23122	2.45652	0.00796813	0.195819	0.239429	Vesicle-Mediated Transport To The Plasma Membrane
Positive Regulation Of Canonical Wnt Signaling Pathway (GO:0090263)	2	75	251	23122	2.45652	0.00796813	0.195819	0.239429	Positive Regulation Of Canonical Wnt Signaling Pathway
Vesicle Fusion (GO:0006906)	2	76	251	23122	2.4242	0.00796813	0.199764	0.243721	Vesicle Fusion
Negative Regulation Of Binding (GO:0051100)	2	77	251	23122	2.39271	0.00796813	0.203719	0.248006	Negative Regulation Of Binding
Organelle Assembly (GO:0070925)	5	288	251	23122	1.5993	0.0199203	0.204587	0.248522	Organelle Assembly
Negative Regulation Of Cell Migration (GO:0030336)	3	144	251	23122	1.91916	0.0119522	0.206198	0.249397	Negative Regulation Of Cell Migration
Positive Regulation Of DNA-binding Transcription Factor Activity (GO:0051091)	4	215	251	23122	1.71385	0.0159363	0.20618	0.249397	Positive Regulation Of DNA-binding Transcription Factor Activity
Protein Ubiquitination (GO:0016567)	6	365	251	23122	1.51429	0.0239044	0.206813	0.249602	Protein Ubiquitination
Positive Regulation Of Cold-Induced Thermogenesis (GO:0120162)	2	78	251	23122	2.36204	0.00796813	0.207683	0.250113	Positive Regulation Of Cold-Induced Thermogenesis
Regulation Of Autophagy (GO:0010506)	4	220	251	23122	1.6749	0.0159363	0.217489	0.260801	Regulation Of Autophagy
Positive Regulation Of Programmed Cell Death (GO:0043068)	4	220	251	23122	1.6749	0.0159363	0.217489	0.260801	Positive Regulation Of Programmed Cell Death
Positive Regulation Of Macromolecule Metabolic Process (GO:0010604)	5	296	251	23122	1.55607	0.0199203	0.220047	0.261073	Positive Regulation Of Macromolecule Metabolic Process
Nuclear-Transcribed mRNA Catabolic Process (GO:0000956)	2	81	251	23122	2.27456	0.00796813	0.21962	0.261073	Nuclear-Transcribed mRNA Catabolic Process
Positive Regulation Of Protein Kinase B Signaling (GO:0051897)	2	81	251	23122	2.27456	0.00796813	0.21962	0.261073	Positive Regulation Of Protein Kinase B Signaling
Positive Regulation Of Cellular Component Biogenesis (GO:0044089)	2	81	251	23122	2.27456	0.00796813	0.21962	0.261073	Positive Regulation Of Cellular Component Biogenesis
Axon Development (GO:0061564)	2	81	251	23122	2.27456	0.00796813	0.21962	0.261073	Axon Development
Negative Regulation Of Amide Metabolic Process (GO:0034249)	2	83	251	23122	2.21975	0.00796813	0.227609	0.267776	Negative Regulation Of Amide Metabolic Process
Protein Phosphorylation (GO:0006468)	7	455	251	23122	1.41722	0.0278884	0.226593	0.267776	Protein Phosphorylation
Positive Regulation Of MAP Kinase Activity (GO:0043406)	2	83	251	23122	2.21975	0.00796813	0.227609	0.267776	Positive Regulation Of MAP Kinase Activity
Regulation Of Endothelial Cell Proliferation (GO:0001936)	2	83	251	23122	2.21975	0.00796813	0.227609	0.267776	Regulation Of Endothelial Cell Proliferation
Regulation Of Double-Strand Break Repair (GO:2000779)	2	84	251	23122	2.19332	0.00796813	0.231612	0.270778	Regulation Of Double-Strand Break Repair
Positive Regulation Of Metabolic Process (GO:0009893)	2	84	251	23122	2.19332	0.00796813	0.231612	0.270778	Positive Regulation Of Metabolic Process
Positive Regulation Of Proteasomal Protein Catabolic Process (GO:1901800)	2	84	251	23122	2.19332	0.00796813	0.231612	0.270778	Positive Regulation Of Proteasomal Protein Catabolic Process
Positive Regulation Of Inflammatory Response (GO:0050729)	2	85	251	23122	2.16752	0.00796813	0.235619	0.273749	Positive Regulation Of Inflammatory Response
Negative Regulation Of Macromolecule Biosynthetic Process (GO:0010558)	2	85	251	23122	2.16752	0.00796813	0.235619	0.273749	Negative Regulation Of Macromolecule Biosynthetic Process
ERAD Pathway (GO:0036503)	2	85	251	23122	2.16752	0.00796813	0.235619	0.273749	ERAD Pathway
Negative Regulation Of Cellular Process (GO:0048523)	7	463	251	23122	1.39274	0.0278884	0.239374	0.277258	Negative Regulation Of Cellular Process
Vesicle Organization (GO:0016050)	2	86	251	23122	2.14231	0.00796813	0.23963	0.277258	Vesicle Organization
Peptidyl-Lysine Modification (GO:0018205)	2	87	251	23122	2.11769	0.00796813	0.243645	0.280743	Peptidyl-Lysine Modification
Regulation Of Protein Localization (GO:0032880)	2	87	251	23122	2.11769	0.00796813	0.243645	0.280743	Regulation Of Protein Localization
Intracellular Monoatomic Cation Homeostasis (GO:0030003)	3	158	251	23122	1.7491	0.0119522	0.246098	0.282987	Intracellular Monoatomic Cation Homeostasis
Positive Regulation Of Epithelial Cell Migration (GO:0010634)	2	88	251	23122	2.09363	0.00796813	0.247662	0.284202	Positive Regulation Of Epithelial Cell Migration
Regulation Of Programmed Cell Death (GO:0043067)	3	160	251	23122	1.72724	0.0119522	0.2519	0.288475	Regulation Of Programmed Cell Death
Positive Regulation Of T Cell Activation (GO:0050870)	2	90	251	23122	2.0471	0.00796813	0.255703	0.292232	Positive Regulation Of T Cell Activation
Negative Regulation Of Signal Transduction (GO:0009968)	4	237	251	23122	1.55476	0.0159363	0.257078	0.293205	Negative Regulation Of Signal Transduction
Regulation Of Cell Motility (GO:2000145)	2	91	251	23122	2.0246	0.00796813	0.259725	0.295622	Regulation Of Cell Motility
Regulation Of Protein Phosphorylation (GO:0001932)	4	239	251	23122	1.54175	0.0159363	0.261832	0.297416	Regulation Of Protein Phosphorylation
Negative Regulation Of Macromolecule Metabolic Process (GO:0010605)	3	164	251	23122	1.68511	0.0119522	0.263562	0.29778	Negative Regulation Of Macromolecule Metabolic Process
Recombinational Repair (GO:0000725)	2	92	251	23122	2.0026	0.00796813	0.263748	0.29778	Recombinational Repair
Protein Complex Oligomerization (GO:0051259)	2	92	251	23122	2.0026	0.00796813	0.263748	0.29778	Protein Complex Oligomerization
Positive Regulation Of Autophagy (GO:0010508)	2	93	251	23122	1.98106	0.00796813	0.267771	0.301714	Positive Regulation Of Autophagy
Positive Regulation Of Signal Transduction (GO:0009967)	4	242	251	23122	1.52264	0.0159363	0.268995	0.302484	Positive Regulation Of Signal Transduction
[truncated: 62 more rows]

## Sheet: Supplementary Table 6
Supplementary Table 6: Astrocyte secreted protein chaperones correlated with WDR49 iA phenotypes.
[truncated: 36 more rows]
